# Supplementary material for: Loss-of-function of ALDH3B2 transdifferentiates human pancreatic duct cells into beta-like cells
Source: bioRxiv preprint, doi:10.1101/2024.05.13.593941, version 1 (2024-05-15)
Supplement: Supplemental Table 1 [file 593941_file03.xlsx]

## Sheet: Supplemental Table 1
X	gene	sgRNA	gRNASeq	Control_1	Control_2	GFP+_1	GFP+_2		FC1	FC2	LOG2_FC1	LOG2_FC2	p-value	K	FDR	FC	LOG2_FC	-LOG10FDR
1	A1BG	HGLibA_00001	GTCGCTGAGCTCCGATTCGA	5.23356	2.25056	0.164157	0.0476165		0.0090983	0.0211576	-6.78019	-5.56268	0.135168	78966	0.211246	0.015128	-6.17143	0.675212
2	A1BG	HGLibA_00002	ACCTGTAGTTGCCGGCGTGC	4.24947	4.5547	0.0820784	0.0952331		0.0224106	0.0209087	-5.47968	-5.57975	0.0012518	7884	0.0195949	0.0216596	-5.52971	1.70786
3	A1BG	HGLibA_00003	CGTCAGCGTCACATTGGCCA	10.7355	18.326	0.246235	0.428549		0.0399188	0.0233848	-4.64679	-5.41829	0.064678	57348	0.139185	0.0316518	-5.03254	0.856408
4	A1CF	HGLibA_00004	CGCGCACTGGTCCAGCGCAC	15.7902	9.00224	0.123118	0.14285		0.00904675	0.0158682	-6.78838	-5.97771	0.0687869	58973	0.143948	0.0124575	-6.38305	0.841794
5	A1CF	HGLibA_00005	CCAAGCTATATCCTGTGCGC	10.3777	2.03622	0.205196	0.14285		0.0137651	0.0701543	-6.18284	-3.83333	0.28497	103528	0.339699	0.0419597	-5.00808	0.468905
6	A1CF	HGLibA_00006	AAGTTGCTTGATTGCATTCT	9.08046	6.48376	0.164157	0.190466		0.0209754	0.0293759	-5.57516	-5.08922	0.0279353	38419	0.0897347	0.0251756	-5.33219	1.04704
7	A2M	HGLibA_00007	CGCTTCTTAAATTCTTGGGT	0.849895	0.214339	0.0410392	0.0952331		0.112053	0.44431	-3.15775	-1.17036	0.282962	103291	0.33808	0.278182	-2.16405	0.47098
8	A2M	HGLibA_00008	TCACAGCGAAGGCGACACAG	2.2813	4.34037	0.0410392	0.0476165		0.0208726	0.0109706	-5.58225	-6.51021	0.0866258	65451	0.163337	0.0159216	-6.04623	0.786915
9	A2M	HGLibA_00009	CAAACTCCTTCATCCAAGTC	7.15701	12.1102	0.205196	0.0952331		0.0133063	0.0078639	-6.23175	-6.99054	0.0619586	56206	0.136042	0.0105851	-6.61114	0.866327
10	A2ML1	HGLibA_00010	AAATTTCCCCTCCGTTCAGA	1.34194	1.71471	0.0410392	0.0952331		0.0709667	0.0555388	-3.81671	-4.17036	0.0162337	29432	0.0680692	0.0632528	-3.99354	1.16705
11	A2ML1	HGLibA_00011	GCTTACCTGTAGTTCCACCA	15.8349	18.969	0.205196	0.238083		0.0150353	0.0125511	-6.0555	-6.31604	0.00821822	20591	0.0492554	0.0137932	-6.18577	1.30755
12	A2ML1	HGLibA_00012	TATTTCCAACTCCCGACACC	1.65506	4.01886	0.0410392	0.0476165		0.0287703	0.0118483	-5.11928	-6.39918	0.14195	80660	0.217186	0.0203093	-5.75923	0.663169
13	A3GALT2	HGLibA_00013	CGAATGCGCGTCGCGTTCGA	1.07355	5.41206	0.0410392	0.0952331		0.0887084	0.0175965	-3.49478	-5.82857	0.280919	103102	0.336254	0.0531524	-4.66168	0.473332
14	A3GALT2	HGLibA_00014	CTTCGAACGCGACGCGCATT	13.9114	18.1652	0.369353	0.238083		0.0171142	0.0131065	-5.86867	-6.25357	0.0178022	30863	0.0711853	0.0151103	-6.06112	1.14761
15	A3GALT2	HGLibA_00015	CGGCAGATCCTACTTACACT	0.0894626	0.482263	0.0410392	0.0476165		0.532251	0.0987357	-0.909822	-3.34028	0.343856	108585	0.390805	0.315493	-2.12505	0.40804
16	A4GALT	HGLibA_00016	CAGTCCCGCTACGTCCTCAA	21.7842	23.095	0.410392	0.380932		0.0174867	0.0164941	-5.8376	-5.9219	0.000883348	6476	0.0168337	0.0169904	-5.87975	1.77382
17	A4GALT	HGLibA_00017	CTACTGCCCCACGACGCACG	22.5893	22.452	0.410392	0.619015		0.027403	0.0275706	-5.18952	-5.18073	3.21994e-05	601	0.00661192	0.0274868	-5.18512	2.17967
18	A4GALT	HGLibA_00018	CTTTGAGGACATCAACCCCG	11.6749	7.12677	0.164157	0.14285		0.0122356	0.0200441	-6.35277	-5.64068	0.0554895	53497	0.128008	0.0161399	-5.99672	0.892764
19	A4GNT	HGLibA_00019	CAGCTCGGATGCATCCCGCC	4.47313	6.43017	0.0820784	0.0952331		0.02129	0.0148103	-5.55368	-6.07725	0.0317169	41028	0.0954036	0.0180502	-5.81546	1.02044
20	A4GNT	HGLibA_00020	GTAGCGCCTCCACTCTCGAT	3.17592	1.55396	0.0820784	0.0476165		0.014993	0.0306421	-6.05957	-5.02834	0.105124	71103	0.182461	0.0228175	-5.54396	0.738831
21	A4GNT	HGLibA_00021	GAAACACAATGCCACGTCTG	13.5983	10.7705	0.287275	0.190466		0.0140066	0.017684	-6.15775	-5.82141	0.0137375	27118	0.0625177	0.0158453	-5.98958	1.204
22	AAAS	HGLibA_00022	TCCCTTATCAGGCGTGATGT	9.5725	14.8966	0.246235	0.238083		0.0248715	0.0159824	-5.32936	-5.96737	0.0459074	48960	0.115716	0.020427	-5.64837	0.936605
23	AAAS	HGLibA_00023	CCCAGACGGCAGCAAAATCC	8.58841	1.44679	0.0410392	0.0476165		0.00554428	0.0329119	-7.49478	-4.92525	0.298319	104820	0.351229	0.0192281	-6.21002	0.454409
24	AAAS	HGLibA_00024	GTGGGGTGACCAACCTGCTC	0.805164	1.92905	0.0820784	0.0952331		0.118278	0.0493678	-3.07975	-4.34028	0.150729	82570	0.225284	0.0838229	-3.71002	0.64727
25	AACS	HGLibA_00025	CCCCGGTCGGGAGGAGATCC	3.53377	5.67998	0.0820784	0.238083		0.0673735	0.0419161	-3.89168	-4.57635	0.0538576	52778	0.125935	0.0546448	-4.23401	0.899852
26	AACS	HGLibA_00026	CTTCTCACGTGTGTATGATG	15.1639	18.8083	0.369353	0.571398		0.0376815	0.0303802	-4.73	-5.04072	0.0119908	25238	0.0586337	0.0340308	-4.88536	1.23185
27	AACS	HGLibA_00027	GTTATGATGACTTGTACCAT	5.68088	7.71621	0.164157	0.190466		0.0335276	0.0246839	-4.89851	-5.34028	0.0235017	35287	0.0821936	0.0291058	-5.1194	1.08516
28	AADAC	HGLibA_00028	GTCACCCGACTTCGCAACAC	18.8319	9.16299	0.287275	0.333316		0.0176995	0.0363763	-5.82014	-4.78086	0.105401	71207	0.182674	0.0270379	-5.3005	0.738322
29	AADAC	HGLibA_00029	GAACCCCAGTGTTGCGAAGT	7.38067	1.82188	0.0820784	0.0476165		0.00645152	0.0261359	-7.27614	-5.25782	0.244242	98534	0.305906	0.0162937	-6.26698	0.514412
30	AADAC	HGLibA_00030	AAAGCTCCCGACAACCTTAA	2.19183	2.89358	0.0820784	0.0476165		0.0217245	0.0164559	-5.52453	-5.92525	0.0195133	32340	0.0744636	0.0190902	-5.72489	1.12806
31	AADACL2	HGLibA_00031	AATATATCACAGCTCGCCTT	13.7772	4.2332	0.205196	0.238083		0.0172809	0.0562418	-5.85468	-4.15221	0.207032	93192	0.274165	0.0367613	-5.00345	0.561988
32	AADACL2	HGLibA_00032	TGTTTGCCGTCCATCTATTC	10.3777	19.8799	0.246235	0.428549		0.0412953	0.0215568	-4.59788	-5.53571	0.0895638	66462	0.166308	0.0314261	-5.06679	0.779087
33	AADACL2	HGLibA_00033	TTTGGCAAGTACAATCGTAC	17.1321	12.1102	0.492471	0.428549		0.0250144	0.0353876	-5.3211	-4.82061	0.030038	39870	0.0929776	0.030201	-5.07086	1.03162
34	AADACL3	HGLibA_00034	ATCGTGTACTACCACGGTGG	21.65	10.8241	0.246235	0.476165		0.0219938	0.0439911	-5.50676	-4.50664	0.0992829	69434	0.176464	0.0329925	-5.0067	0.753344
35	AADACL3	HGLibA_00035	AAATCCGTGACCACAACATC	4.83098	8.94865	0.205196	0.14285		0.0295695	0.0159633	-5.07975	-5.9691	0.0825336	63993	0.159167	0.0227664	-5.52442	0.798148
36	AADACL3	HGLibA_00036	GATCCACTCCATATGCATCC	2.68388	5.25131	0.123118	0.0476165		0.0177417	0.00906756	-5.81671	-6.78507	0.0942218	67870	0.171328	0.0134046	-6.30089	0.766172
37	AADACL4	HGLibA_00037	CGGGTATCGTCCCAAAACGC	8.09637	9.37733	0.328314	0.14285		0.0176437	0.0152335	-5.82471	-6.03661	0.00574515	17350	0.0408654	0.0164386	-5.93066	1.38864
38	AADACL4	HGLibA_00038	TCGTACTTCCTCCAGACGTC	6.7097	3.42942	0.0820784	0.190466		0.0283867	0.0555388	-5.13864	-4.17036	0.0951263	68169	0.172214	0.0419628	-4.6545	0.763933
39	AADACL4	HGLibA_00039	ACCATGTCACGCGGACCCCC	20.4869	14.2	0.205196	0.333316		0.0162697	0.023473	-5.94167	-5.41285	0.0322769	41369	0.0962878	0.0198713	-5.67726	1.01643
40	AADAT	HGLibA_00040	ACCAAAATCGATGATCTCCT	19.3687	8.35922	0.328314	0.14285		0.0073753	0.0170889	-7.08308	-5.8708	0.131711	78172	0.207933	0.0122321	-6.47694	0.682076
41	AADAT	HGLibA_00041	CTTCAGTATTCTCCGAGTGC	4.60733	4.17961	0.164157	0.0476165		0.010335	0.0113926	-6.59632	-6.45576	0.00266188	11743	0.0279745	0.0108638	-6.52604	1.55324
42	AADAT	HGLibA_00042	ATTAACCAGTGAACGCAAAA	3.13119	0.535848	0.0410392	0.0952331		0.0304143	0.177724	-5.03911	-2.49229	0.30681	105577	0.358636	0.104069	-3.7657	0.445346
43	AAED1	HGLibA_00043	ATGACTGTCCAATCACTATA	2.90754	2.41131	0.0820784	0.0952331		0.0327539	0.0394943	-4.93219	-4.66221	0.00919282	22000	0.051568	0.0361241	-4.7972	1.28762
44	AAED1	HGLibA_00044	AATGTCACCCTTATAGTGAT	9.79616	4.01886	0.164157	0.238083		0.0243037	0.0592414	-5.36268	-4.07725	0.145991	81552	0.220926	0.0417725	-4.71997	0.655754
45	AAED1	HGLibA_00045	GCTTACCTGGACCTAAAATG	0.178925	1.82188	0.0820784	0.0476165		0.266125	0.0261359	-1.90982	-5.25782	0.372874	110798	0.415321	0.146131	-3.58382	0.381616
46	AAGAB	HGLibA_00046	ACCATTCTTCATCACTACAT	11.6301	7.23394	0.164157	0.238083		0.0204712	0.0329119	-5.61026	-4.92525	0.0523084	52036	0.124057	0.0266915	-5.26775	0.906379
47	AAGAB	HGLibA_00047	GCCTTGATAGTGTCTCCTCA	8.49895	15.6467	0.410392	0.380932		0.0448211	0.0243458	-4.47968	-5.36018	0.0822778	63902	0.158899	0.0345834	-4.91993	0.798878
48	AAGAB	HGLibA_00048	AGCAGACATCAATCTATGTG	3.48904	5.84074	0.164157	0.0952331		0.0272949	0.016305	-5.19522	-5.93854	0.0611711	55894	0.135063	0.0217999	-5.56688	0.869465
49	AAK1	HGLibA_00049	GACCATTTCTGGTGCTCGAT	2.01291	2.89358	0.0820784	0.0952331		0.0473112	0.0329119	-4.40168	-4.92525	0.0329794	41821	0.0973201	0.0401115	-4.66346	1.0118
50	AAK1	HGLibA_00050	GTCCTATCGAGCACCAGAAA	1.16301	2.94716	0.0410392	0.0476165		0.0409424	0.0161567	-4.61026	-5.95172	0.152924	83100	0.227106	0.0285495	-5.28099	0.643771
51	AAK1	HGLibA_00051	GTTGACAAACATGCGTTTCA	7.91744	10.6634	0.164157	0.285699		0.0360848	0.0267926	-4.79247	-5.22202	0.0222188	34404	0.0797014	0.0314387	-5.00724	1.09853
52	AAMDC	HGLibA_00052	AGGCTCTAATACAACCTATA	0.626238	0.0535848	0.0410392	0.0476165		0.0760358	0.888621	-3.71718	-0.17036	0.410431	113264	0.4472	0.482328	-1.94377	0.349498
53	AAMDC	HGLibA_00053	TCCCAAGTCCGACTACCCCC	5.00991	3.80452	0.0410392	0.0476165		0.00950447	0.0125158	-6.71718	-6.32011	0.0185541	31504	0.0726823	0.0110101	-6.51864	1.13857
54	AAMDC	HGLibA_00054	GGTGTACAGACTCTTGTGAT	0.178925	1.17886	0.0410392	0.0476165		0.266125	0.0403919	-1.90982	-4.62979	0.332085	107685	0.380582	0.153259	-3.26981	0.419552
55	AAMP	HGLibA_00055	ATCGCTGAGCCGCCATACGA	4.65206	2.73282	0.0820784	0.0476165		0.0102356	0.0174239	-6.61026	-5.84279	0.0634143	56809	0.13776	0.0138298	-6.22652	0.860876
56	AAMP	HGLibA_00056	GGAGGGCCCCGACGATAGCG	0.178925	0.267924	0.0410392	0.0476165		0.266125	0.177724	-1.90982	-2.49229	0.0568321	54045	0.129775	0.221925	-2.20106	0.886808
57	AAMP	HGLibA_00057	CTCCAGGTCTCCCGCTTCAA	5.41249	3.32226	0.123118	0.0952331		0.0175951	0.0286652	-5.82869	-5.12456	0.0552995	53397	0.127808	0.0231301	-5.47662	0.893442
58	AANAT	HGLibA_00058	CGCGTCCTCGCACATGAGCG	16.8637	17.2543	0.369353	0.190466		0.0112944	0.0110388	-6.46824	-6.50128	0.000163844	2144	0.00943103	0.0111666	-6.48476	2.02544
59	AANAT	HGLibA_00059	ACCTTCACGCTCGATCTCAA	8.67788	3.8581	0.0820784	0.14285		0.0164614	0.0370259	-5.92477	-4.75532	0.125158	76619	0.201592	0.0267436	-5.34005	0.695526
60	AANAT	HGLibA_00060	CCTTCATCATCGGCTCGCTC	3.26539	3.05433	0.123118	0.0476165		0.0145822	0.0155898	-6.09965	-6.00325	0.00132623	8141	0.0201045	0.015086	-6.05145	1.69671
61	AAR2	HGLibA_00061	GAGGTCGGGCCCAAGTTCCG	2.1471	0.535848	0.0820784	0.0476165		0.0221771	0.0888621	-5.49478	-3.49229	0.253988	99893	0.313785	0.0555196	-4.49354	0.503368
62	AAR2	HGLibA_00062	GGCACAGATCTGTCGATTCT	10.2882	3.59018	0.123118	0.0952331		0.00925653	0.026526	-6.75531	-5.23645	0.178247	88195	0.24942	0.0178913	-5.99588	0.603069
63	AAR2	HGLibA_00063	AAAGTCCCACCGGAACTTCT	0.402582	0.0535848	0.0410392	0.0476165		0.118278	0.888621	-3.07975	-0.17036	0.402835	112719	0.441046	0.503449	-1.62505	0.355516
64	AARD	HGLibA_00064	CGTCCCGCGTGCGACTTCTT	4.96518	3.32226	0.0410392	0.14285		0.0287703	0.0429978	-5.11928	-4.53959	0.0388718	45205	0.106121	0.035884	-4.82943	0.974198
65	AARD	HGLibA_00065	GTCCCCGAAGAAGTCGCACG	2.90754	1.60754	0.123118	0.0952331		0.0327539	0.0592414	-4.93219	-4.07725	0.0806564	63372	0.157071	0.0459976	-4.50472	0.803905
66	AARD	HGLibA_00066	AAAAGATGATGCTGCGAATC	8.76734	2.78641	0.287275	0.190466		0.0217245	0.0683555	-5.52453	-3.8708	0.20528	92923	0.272632	0.04504	-4.69767	0.564423
67	AARS	HGLibA_00067	CCACGCTCGGACCATCACTG	11.5407	4.60829	0.205196	0.333316		0.0288818	0.0723296	-5.11369	-3.78927	0.153199	83144	0.227394	0.0506057	-4.45148	0.643221
68	AARS	HGLibA_00068	TGGGGGCAAACATAATGACC	0.178925	0.321509	0.0410392	0.0476165		0.266125	0.148103	-1.90982	-2.75532	0.102084	70281	0.179256	0.207114	-2.33257	0.746526
69	AARS	HGLibA_00069	TCACACCTTCTTCGAGATGC	17.4005	18.2724	0.369353	0.380932		0.0218921	0.0208474	-5.51345	-5.58399	0.000622891	5312	0.0144713	0.0213697	-5.54872	1.83949
70	AARS2	HGLibA_00070	CCATTCGAAGGTCGCCCGCA	15.9243	13.5034	0.410392	0.333316		0.0209312	0.0246839	-5.5782	-5.34028	0.00705555	19279	0.0451648	0.0228076	-5.45924	1.3452
71	AARS2	HGLibA_00071	GCCGCGGGGCCGCACGGAAG	1.02882	0.750187	0.0410392	0.0476165		0.0462827	0.0634729	-4.43338	-3.97771	0.0261259	37132	0.0868314	0.0548778	-4.20555	1.06132
72	AARS2	HGLibA_00072	AAGCCTGCCATCTCGCTTCG	11.988	5.51923	0.123118	0.0952331		0.00794404	0.0172548	-6.97591	-5.85686	0.116114	74261	0.192965	0.0125994	-6.41639	0.714522
73	AARSD1	HGLibA_00073	GTGCTGAGAGTGACTCGCCG	1.5656	2.25056	0.0410392	0.14285		0.091243	0.0634729	-3.45414	-3.97771	0.0344783	42676	0.0997049	0.0773579	-3.71593	1.00128
74	AARSD1	HGLibA_00074	TTCATTGACGCTCTGCTCAA	11.1381	14.843	0.164157	0.380932		0.0342008	0.0256641	-4.86982	-5.2841	0.0206315	33187	0.0767215	0.0299325	-5.07696	1.11508
75	AARSD1	HGLibA_00075	AGATGTCATTGATTGTACCA	16.1927	12.4852	0.164157	0.285699		0.0176437	0.0228829	-5.82471	-5.44958	0.016834	29972	0.0693146	0.0202633	-5.63714	1.15918
76	AASDH	HGLibA_00076	GACCTTCGATCCTTCTGTTG	8.90153	9.05582	0.205196	0.0476165		0.00534925	0.00525811	-7.54645	-7.57124	0.000155132	2078	0.00921317	0.00530368	-7.55884	2.03559
77	AASDH	HGLibA_00077	TAAGGCTGCCTCCTGTTATA	4.92044	6.96602	0.0820784	0.14285		0.0290319	0.0205066	-5.10622	-5.60777	0.0294432	39452	0.0921022	0.0247692	-5.35699	1.03573
78	AASDH	HGLibA_00078	TCGATAGGTACATAAGCAGC	8.32002	8.41281	0.123118	0.238083		0.0286156	0.0283	-5.12705	-5.14305	8.14194e-05	1301	0.00772333	0.0284578	-5.13505	2.1122
79	AASDHPPT	HGLibA_00079	ACCCGATGGATCTAGACATC	12.5248	23.5237	0.328314	0.285699		0.0228107	0.0121452	-5.45414	-6.36347	0.0843405	64656	0.160983	0.017478	-5.90881	0.793219
80	AASDHPPT	HGLibA_00080	AGGCTGGTCGTCTGATGATA	12.4353	9.43092	0.205196	0.238083		0.0191457	0.0252449	-5.70684	-5.30786	0.0191081	31989	0.0737175	0.0221953	-5.50735	1.13243
81	AASDHPPT	HGLibA_00081	ATCCTGATGTCTAGATCCAT	4.51786	13.289	0.123118	0.190466		0.0421585	0.0143326	-4.56803	-6.12456	0.184274	89239	0.254838	0.0282455	-5.3463	0.593737
82	AASS	HGLibA_00082	TCTGGATCACATGTTAGCAA	2.2813	0.589432	0.123118	0.14285		0.0626177	0.242351	-3.99729	-2.04483	0.263568	100991	0.32208	0.152484	-3.02106	0.492037
83	AASS	HGLibA_00083	GTTAACTTTGTTTGTGATGC	2.41549	3.00075	0.0820784	0.0952331		0.039426	0.0317365	-4.66471	-4.97771	0.012257	25564	0.0591709	0.0355812	-4.82121	1.22789
84	AASS	HGLibA_00084	TAGGCAGTGATTACATCCAA	4.33894	4.66187	0.0820784	0.238083		0.0548712	0.0510702	-4.18781	-4.29138	0.0017026	9379	0.0224031	0.0529707	-4.23959	1.64969
85	AATF	HGLibA_00085	GTTGAACCCGCGACCAAGCG	0.0447313	0.428678	0.0410392	0.0476165		1.0645	0.111078	0.0901775	-3.17036	0.421898	115137	0.452217	0.587789	-1.54009	0.344653
86	AATF	HGLibA_00086	CGCTCTGTCTATCGAGTTCT	1.02882	2.51848	0.123118	0.0476165		0.0462827	0.0189068	-4.43338	-5.72495	0.151894	82808	0.226372	0.0325947	-5.07917	0.645176
87	AATF	HGLibA_00087	GTCTACTCACCAGACGATCC	1.47613	5.09055	0.123118	0.14285		0.0967728	0.0280617	-3.36925	-5.15525	0.223422	95751	0.287963	0.0624173	-4.26225	0.540664
88	AATK	HGLibA_00088	GCGCTGGATCGCGCCAGAGC	1.74452	1.01811	0.0410392	0.0952331		0.0545898	0.093539	-4.19522	-3.41829	0.0690521	59087	0.144224	0.0740644	-3.80676	0.840961
89	AATK	HGLibA_00089	CCGTGAGCAGGCAGTTCCGC	3.44431	6.64451	0.123118	0.0476165		0.0138247	0.0071663	-6.17661	-7.12456	0.0902843	66678	0.167103	0.0104955	-6.65058	0.777016
90	AATK	HGLibA_00090	TCGTGACTGCCGACCAGCTG	33.0117	23.7916	0.328314	0.571398		0.017309	0.0240168	-5.85234	-5.37981	0.0261569	37161	0.0868666	0.0206629	-5.61608	1.06115
91	ABAT	HGLibA_00091	TGCAATTACGAAGAGAGCCG	3.44431	4.50112	0.0820784	0.0952331		0.0276494	0.0211576	-5.17661	-5.56268	0.0180123	31070	0.0715454	0.0244035	-5.36964	1.14542
92	ABAT	HGLibA_00092	CATGTTGCTCGCCCAGCGCC	0.402582	6.53734	0.0410392	0.0952331		0.236556	0.0145676	-2.07975	-6.1011	0.382928	111363	0.424356	0.125562	-4.09042	0.37227
93	ABAT	HGLibA_00093	CCAGCACAGCTACCGCCTGC	4.87571	6.37659	0.246235	0.190466		0.0390643	0.0298696	-4.67801	-5.06518	0.0187431	31709	0.0729478	0.0344669	-4.87159	1.13699
94	ABCA1	HGLibA_00094	GCCTCCGAGCATCTGAGAAC	9.7067	4.44753	0.0820784	0.190466		0.0196221	0.0428251	-5.67137	-4.5454	0.118587	74933	0.195307	0.0312236	-5.10839	0.709282
95	ABCA1	HGLibA_00095	TGTTTCCGTTACCCGACTCC	15.2981	12.9139	0.205196	0.14285		0.00933773	0.0110617	-6.74271	-6.49829	0.00724684	19523	0.0458095	0.0101997	-6.6205	1.33904
96	ABCA1	HGLibA_00096	CCTCCCCAGGAGTCGGGTAA	0.536776	0.267924	0.0410392	0.0476165		0.0887084	0.177724	-3.49478	-2.49229	0.116848	74441	0.193715	0.133216	-2.99354	0.712836
97	ABCA10	HGLibA_00097	TCAGAGTGCTCCTTTATAAC	11.0486	7.98413	0.123118	0.190466		0.0172389	0.0238556	-5.85819	-5.38953	0.0257813	36894	0.0862388	0.0205472	-5.62386	1.0643
98	ABCA10	HGLibA_00098	CATATCGCCTGAAGTTTAAT	6.39658	5.51923	0.123118	0.190466		0.0297763	0.0345096	-5.06969	-4.85686	0.00570276	17287	0.0407117	0.0321429	-4.96328	1.39028
99	ABCA10	HGLibA_00099	CTTCCTTAAAGAACACTGTT	16.0138	7.44828	0.246235	0.571398		0.0356816	0.0767155	-4.80868	-3.70434	0.118378	74876	0.195112	0.0561985	-4.25651	0.709717
100	ABCA12	HGLibA_00100	CAAGTGCTCGCACGAATTCT	3.57851	3.48301	0.164157	0.0476165		0.0133063	0.0136711	-6.23175	-6.19273	0.000483486	4552	0.013108	0.0134887	-6.21224	1.88246
101	ABCA12	HGLibA_00101	CCTCGAAACCTTCCTAGTAC	10.8697	5.78715	0.0410392	0.14285		0.013142	0.0246839	-6.24967	-5.34028	0.0834821	64338	0.160133	0.018913	-5.79498	0.79552
102	ABCA12	HGLibA_00102	CCCGGAACATATACTTTCAA	0.536776	0.535848	0.0410392	0.0952331		0.177417	0.177724	-2.49478	-2.49229	0.00333406	13196	0.0311807	0.177571	-2.49354	1.50611
103	ABCA13	HGLibA_00103	AGACCAAATCACCGCCCTGC	3.22065	5.46565	0.0820784	0.14285		0.0443542	0.0261359	-4.49478	-5.25782	0.0637816	56962	0.138186	0.0352451	-4.8763	0.859536
104	ABCA13	HGLibA_00104	ACCCACACTCTTCCAATATG	14.6719	7.71621	0.164157	0.0476165		0.00324543	0.00617098	-8.26737	-7.34028	0.085914	65215	0.162581	0.0047082	-7.80383	0.78893
105	ABCA13	HGLibA_00105	TACTTGAGCAACTTGATTCC	1.47613	8.03771	0.123118	0.0476165		0.0322576	0.00592414	-4.95422	-7.39918	0.290504	104084	0.344447	0.0190909	-6.1767	0.462877
106	ABCA2	HGLibA_00106	GAGTGCTTGGGCCGTGCTAT	3.39958	2.57207	0.123118	0.14285		0.0420198	0.0555388	-4.57279	-4.17036	0.0204046	33029	0.0762405	0.0487793	-4.37157	1.11781
107	ABCA2	HGLibA_00107	CTCGGTGGCCAGAAACCCGC	1.38667	0.857356	0.0410392	0.0952331		0.0686775	0.111078	-3.86402	-3.17036	0.0582167	54717	0.131304	0.0898776	-3.51719	0.881721
108	ABCA2	HGLibA_00108	GAAGCCCACCATCTCCGTGA	0.402582	1.12528	0.0410392	0.0476165		0.118278	0.0423153	-3.07975	-4.56268	0.184685	89310	0.255203	0.0802966	-3.82121	0.593114
109	ABCA3	HGLibA_00109	TCCGTGTGTAACTGAACCGT	32.3407	24.9705	0.410392	0.380932		0.0117787	0.0152553	-6.40767	-6.03455	0.0165828	29779	0.0687231	0.013517	-6.22111	1.1629
110	ABCA3	HGLibA_00110	GCGCGGCTTTCCCTCCGAGA	0.760432	0.321509	0.0410392	0.0476165		0.0626177	0.148103	-3.99729	-2.75532	0.152001	82827	0.226479	0.105361	-3.3763	0.644971
111	ABCA3	HGLibA_00111	TCATGAAGGAGGCGGCGATG	7.38067	4.71546	0.123118	0.0952331		0.012903	0.0201959	-6.27614	-5.62979	0.0468447	49401	0.117025	0.0165495	-5.95297	0.931722
112	ABCA4	HGLibA_00112	CACCTCGAAGCCGGGCATAA	5.81507	3.69735	0.0410392	0.14285		0.0245654	0.0386357	-5.34723	-4.69392	0.0479689	50013	0.118367	0.0316006	-5.02057	0.926769
113	ABCA4	HGLibA_00113	ATGCCACCGTAGCAGGCAAG	9.5725	7.23394	0.0820784	0.14285		0.0149229	0.0197471	-6.06633	-5.66221	0.0193288	32160	0.0741726	0.017335	-5.86427	1.12976
114	ABCA4	HGLibA_00114	GCAATTGATGAGCTGCTCAC	4.02582	7.18036	0.164157	0.0952331		0.0236556	0.013263	-5.40168	-6.23645	0.0739802	60920	0.149868	0.0184593	-5.81906	0.82429
115	ABCA5	HGLibA_00115	TCTAAGCCGAGCAACTTTGT	4.83098	9.53809	0.205196	0.285699		0.059139	0.0299535	-4.07975	-5.06113	0.0983832	69146	0.175593	0.0445462	-4.57044	0.755492
116	ABCA5	HGLibA_00116	GAAATAGATACCTTTCCCCG	0.0894626	0.321509	0.0410392	0.0476165		0.532251	0.148103	-0.909822	-2.75532	0.299421	104903	0.352248	0.340177	-1.83257	0.453152
117	ABCA5	HGLibA_00117	TCTACTGATCATCTACCTGA	4.16001	5.03697	0.0410392	0.14285		0.0343387	0.0283602	-4.86402	-5.13999	0.00945857	22313	0.0523144	0.0313495	-5.002	1.28138
118	ABCA6	HGLibA_00118	TGGGGCCTCTCAATACTTCT	3.08646	2.25056	0.164157	0.0476165		0.0154276	0.0211576	-6.01835	-5.56268	0.0260615	37084	0.0867296	0.0182926	-5.79051	1.06183
119	ABCA6	HGLibA_00119	GTACACCTACCTTTCAAAAG	4.56259	4.66187	0.0820784	0.190466		0.0417451	0.0408561	-4.58225	-4.6133	0.000269484	3153	0.0105478	0.0413006	-4.59778	1.97684
120	ABCA6	HGLibA_00120	AAGATGATTCCCATAGCATA	3.62324	10.1811	0.0820784	0.14285		0.039426	0.0140309	-4.66471	-6.15525	0.174224	87440	0.245896	0.0267284	-5.40998	0.609249
121	ABCA7	HGLibA_00121	GCTCTCCAAAGACGCGCGCC	0.492044	2.89358	0.0410392	0.0476165		0.0967728	0.0164559	-3.36925	-5.92525	0.303463	105276	0.355738	0.0566144	-4.64725	0.448869
122	ABCA7	HGLibA_00122	ACTCACTGCAGATTCGCGGC	4.02582	4.12603	0.0820784	0.190466		0.0473112	0.0461621	-4.40168	-4.43715	0.000350788	3755	0.0115289	0.0467366	-4.41941	1.93821
123	ABCA7	HGLibA_00123	GAGGCCACAGCAATTCGACC	1.78925	8.41281	0.123118	0.0952331		0.0532251	0.01132	-4.23175	-6.46498	0.270735	101767	0.328316	0.0322725	-5.34837	0.483708
124	ABCA8	HGLibA_00124	TAAATGTATCTACCCGTCCC	5.50195	9.59167	0.164157	0.0952331		0.017309	0.00992873	-5.85234	-6.65418	0.0683286	58815	0.143373	0.0136188	-6.25326	0.843532
125	ABCA8	HGLibA_00125	TCATTTACTTGATGACTATG	7.55959	3.91169	0.0820784	0.285699		0.0377929	0.0730373	-4.72574	-3.77522	0.0933578	67628	0.170364	0.0554151	-4.25048	0.768622
126	ABCA8	HGLibA_00126	TCTTTAATACTTTCCTCATC	5.45722	5.84074	0.0820784	0.14285		0.0261763	0.0244575	-5.2556	-5.35358	0.00122746	7806	0.0194059	0.0253169	-5.30459	1.71207
127	ABCA9	HGLibA_00127	AATCAGTTGCAACTCCTCCT	12.2116	6.323	0.0820784	0.14285		0.0116978	0.0225921	-6.41762	-5.46804	0.0897393	66518	0.166494	0.0171449	-5.94283	0.778603
128	ABCA9	HGLibA_00128	TACGTCATTGATGACAATGA	4.33894	3.32226	0.205196	0.14285		0.0329227	0.0429978	-4.92477	-4.53959	0.0188527	31784	0.0732014	0.0379603	-4.73218	1.13548
129	ABCA9	HGLibA_00129	AAAGAGCACAGAGACCATTC	0.178925	4.50112	0.0410392	0.0476165		0.266125	0.0105788	-1.90982	-6.56268	0.399414	112462	0.4383	0.138352	-4.23625	0.358229
130	ABCB1	HGLibA_00130	TTGGACTGTCAGCTGCTGTC	2.37076	12.646	0.164157	0.0952331		0.0401699	0.00753069	-4.63774	-7.053	0.287466	103767	0.341886	0.0238503	-5.84537	0.466118
131	ABCB1	HGLibA_00131	GAAGCTAACCCTTGTGATTT	13.0168	5.35848	0.0820784	0.0952331		0.00731616	0.0177724	-7.0947	-5.81422	0.140674	80331	0.216115	0.0125443	-6.45446	0.665315
132	ABCB1	HGLibA_00132	CCAAACACCAGCATCATGAG	3.35485	1.12528	0.0410392	0.0476165		0.0141933	0.0423153	-6.13864	-4.56268	0.187698	89856	0.25779	0.0282543	-5.35066	0.588734
133	ABCB10	HGLibA_00133	CAGCTAGCTGAGGAACGTAT	12.659	19.0226	0.164157	0.333316		0.0263304	0.0175221	-5.24713	-5.83468	0.0392363	45427	0.106593	0.0219263	-5.5409	0.972272
134	ABCB10	HGLibA_00134	TACCATCATACTGATGCCTA	8.94626	23.738	0.246235	0.428549		0.0479026	0.0180532	-4.38375	-5.7916	0.162923	85153	0.236122	0.0329779	-5.08768	0.626864
135	ABCB10	HGLibA_00135	TTCTTTGACAAGACTCGCAC	7.51486	11.6279	0.164157	0.238083		0.0316816	0.0204751	-4.98021	-5.60998	0.0449593	48460	0.114496	0.0260784	-5.2951	0.94121
136	ABCB11	HGLibA_00136	GGAACTGTTAGTCCATACAA	1.5656	0.857356	0.0410392	0.0476165		0.0304143	0.0555388	-5.03911	-4.17036	0.0810308	63500	0.157482	0.0429766	-4.60473	0.80277
137	ABCB11	HGLibA_00137	CCAAAAATGAGTAGCACGCC	5.8598	2.14339	0.164157	0.0476165		0.00812596	0.0222155	-6.94325	-5.49229	0.171111	86767	0.243375	0.0151707	-6.21777	0.613724
138	ABCB11	HGLibA_00138	AAGAATTACTGAGTCAGACA	1.74452	1.23245	0.0820784	0.0476165		0.0272949	0.0386357	-5.19522	-4.69392	0.0309888	40527	0.0943657	0.0329653	-4.94457	1.02519
139	ABCB4	HGLibA_00139	AAAGTCGCCCTCCGCGCTCG	8.00691	2.94716	0.123118	0.0476165		0.00594693	0.0161567	-7.39364	-5.95172	0.166791	85976	0.239414	0.0110518	-6.67268	0.62085
140	ABCB4	HGLibA_00140	GAGACCTGATCCGTGAGCTA	2.63915	0.696602	0.0410392	0.14285		0.0541272	0.205066	-4.2075	-2.28584	0.246603	98879	0.307785	0.129597	-3.24667	0.511753
141	ABCB4	HGLibA_00141	TTTAGTTTCGATACTCCGAT	15.1639	19.0762	0.369353	0.14285		0.00942036	0.00748838	-6.73	-7.06113	0.0132325	26541	0.0615289	0.00845437	-6.89557	1.21092
142	ABCB5	HGLibA_00142	CTGCAGCACGACAGACCAAG	14.8061	28.4535	0.205196	0.285699		0.0192961	0.0100409	-5.69555	-6.63797	0.0885163	66046	0.165398	0.0146685	-6.16676	0.781469
143	ABCB5	HGLibA_00143	GGACATCACACTCATGATCC	9.52777	6.75168	0.164157	0.285699		0.0299859	0.0423153	-5.05957	-4.56268	0.0294599	39458	0.0921404	0.0361506	-4.81112	1.03555
144	ABCB5	HGLibA_00144	AGGTTGACCCTGTATTATGT	8.76734	17.4686	0.0820784	0.238083		0.0271556	0.0136292	-5.2026	-6.19716	0.0966881	68639	0.173843	0.0203924	-5.69988	0.759844
145	ABCB6	HGLibA_00145	CTTCCTGCCAAAATCTCGCC	11.0039	6.16225	0.0820784	0.190466		0.017309	0.0309086	-5.85234	-5.01585	0.0732625	60641	0.149097	0.0241088	-5.43409	0.826531
146	ABCB6	HGLibA_00146	GGAACGGGCACTCAATGTGT	3.22065	3.32226	0.0410392	0.14285		0.0443542	0.0429978	-4.49478	-4.53959	0.000511216	4711	0.013392	0.043676	-4.51719	1.87315
147	ABCB6	HGLibA_00147	TCCCCAGTCCTATACATTGC	13.5983	15.0037	0.246235	0.333316		0.0245115	0.0222155	-5.3504	-5.49229	0.00251546	11405	0.0272192	0.0233635	-5.42134	1.56512
148	ABCB7	HGLibA_00148	TCAGCATGTTTCCCGACATC	33.5485	24.9169	0.492471	0.619015		0.0184514	0.0248432	-5.76013	-5.33101	0.0219123	34171	0.0791377	0.0216473	-5.54557	1.10162
149	ABCB7	HGLibA_00149	TTACTAGATCTCCAACAGTA	0.223657	0.857356	0.0820784	0.0952331		0.4258	0.111078	-1.23175	-3.17036	0.290023	104011	0.344118	0.268439	-2.20106	0.463293
150	ABCB7	HGLibA_00150	CTGTATTTGGTGCATCACTC	48.5782	12.7532	0.738706	0.571398		0.0117624	0.0448044	-6.40967	-4.48022	0.235846	97486	0.298565	0.0282834	-5.44494	0.524961
151	ABCB8	HGLibA_00151	CCGCTTGACAACTGACGTGC	3.57851	4.07244	0.123118	0.14285		0.0399188	0.0350771	-4.64679	-4.83333	0.00445071	15298	0.0359045	0.037498	-4.74006	1.44485
152	ABCB8	HGLibA_00152	CAGTCATGAAACTCCCTACG	8.63314	14.2	0.246235	0.14285		0.0165467	0.0100599	-5.91732	-6.63525	0.056386	53877	0.129158	0.0133033	-6.27628	0.888878
153	ABCB8	HGLibA_00153	TAAAGCGAGACCCCACGACA	1.61033	1.7683	0.0410392	0.14285		0.0887084	0.0807837	-3.49478	-3.62979	0.00344271	13392	0.0317256	0.0847461	-3.56229	1.49859
154	ABCB9	HGLibA_00154	TGACGATGCCATCAATGGCG	3.04173	17.0935	0.164157	0.0952331		0.0313089	0.00557129	-4.99729	-7.48777	0.292833	104326	0.346403	0.0184401	-6.24253	0.460419
155	ABCB9	HGLibA_00155	GCAATTAGCTCATTTGCCGC	11.2276	16.129	0.246235	0.190466		0.0169642	0.0118089	-5.88137	-6.40398	0.031593	40894	0.0953422	0.0143865	-6.14267	1.02071
156	ABCB9	HGLibA_00156	AGCGGAAGAGACAGTTTCGA	6.53077	2.25056	0.0820784	0.190466		0.0291644	0.0846306	-5.09965	-3.56268	0.185243	89428	0.255636	0.0568975	-4.33116	0.592378
157	ABCC1	HGLibA_00157	CCGATGGCTCCGACCCGCTC	6.35185	7.12677	0.164157	0.14285		0.0224895	0.0200441	-5.47461	-5.64068	0.00344605	13402	0.0317326	0.0212668	-5.55764	1.49849
158	ABCC1	HGLibA_00158	CGGAAAACATCATCAGGTCG	2.997	4.28678	0.0410392	0.190466		0.0635523	0.044431	-3.97591	-4.49229	0.0322657	41365	0.0962635	0.0539917	-4.2341	1.01654
159	ABCC1	HGLibA_00159	CAAGTTCGTGAATGACACGA	6.44131	9.4845	0.164157	0.14285		0.0221771	0.0150614	-5.49478	-6.053	0.0359314	43567	0.101782	0.0186192	-5.77389	0.99233
160	ABCC10	HGLibA_00160	TGCACGTGTACCAAGCTTAC	12.1222	20.2015	0.205196	0.190466		0.0157122	0.00942834	-5.99197	-6.72878	0.0584729	54820	0.131634	0.0125703	-6.36038	0.88063
161	ABCC10	HGLibA_00161	GTAAGCTTGGTACACGTGCA	5.994	1.12528	0.0820784	0.0952331		0.0158881	0.0846306	-5.97591	-3.56268	0.290008	104009	0.344107	0.0502593	-4.76929	0.463307
162	ABCC10	HGLibA_00162	ATCCGAGACAACATCCTCTT	12.2564	9.64526	0.287275	0.238083		0.0194252	0.0246839	-5.68593	-5.34028	0.0146	27940	0.0644881	0.0220546	-5.51311	1.19052
163	ABCC11	HGLibA_00163	TGTCGATGCCACGATTCACG	19.4581	41.0459	0.369353	0.380932		0.019577	0.00928064	-5.67469	-6.75156	0.109499	72356	0.186762	0.0144288	-6.21313	0.728712
164	ABCC11	HGLibA_00164	GTGAATCGTGGCATCGACAT	11.5407	9.27016	0.205196	0.285699		0.0247558	0.0308192	-5.33609	-5.02003	0.0122715	25579	0.0592063	0.0277875	-5.17806	1.22763
165	ABCC11	HGLibA_00165	CTAAGCGACTCCGTAAGCTT	3.17592	6.64451	0.0820784	0.190466		0.0599719	0.0286652	-4.05957	-5.12456	0.110613	72648	0.187904	0.0443185	-4.59206	0.726065
166	ABCC12	HGLibA_00166	CGTGCGGTAGTTGATGGCCC	16.4611	15.3788	0.205196	0.428549		0.026034	0.0278662	-5.26346	-5.16534	0.00125172	7883	0.0195962	0.0269501	-5.2144	1.70783
167	ABCC12	HGLibA_00167	CTGGGCCATCAACTACCGCA	3.84689	5.67998	0.164157	0.190466		0.0495117	0.0335329	-4.33609	-4.89828	0.0377041	44589	0.104355	0.0415223	-4.61718	0.981486
168	ABCC12	HGLibA_00168	TGCCGCACTCACCGGCCCTA	16.3269	13.4498	0.164157	0.238083		0.0145822	0.0177016	-6.09965	-5.81998	0.00946398	22319	0.0523303	0.0161419	-5.95981	1.28125
169	ABCC2	HGLibA_00169	GGATTGGTATATCGAACAGC	2.50495	0.696602	0.0410392	0.0476165		0.0190089	0.0683555	-5.71718	-3.8708	0.227321	96254	0.291457	0.0436822	-4.79399	0.535425
170	ABCC2	HGLibA_00170	GTATCGAGAGAATCCAGAAT	0.67097	0.964526	0.0410392	0.0476165		0.0709667	0.0493678	-3.81671	-4.34028	0.0341961	42524	0.0992422	0.0601673	-4.0785	1.0033
171	ABCC2	HGLibA_00171	TCCTTACCTGTAAGAGTGTC	20.1738	30.5969	0.410392	0.380932		0.0188825	0.01245	-5.72681	-6.32771	0.0408461	46319	0.108829	0.0156663	-6.02726	0.963254
172	ABCC3	HGLibA_00172	GCCGCTCATACTGTATCAGC	0.357851	0.910941	0.0410392	0.0476165		0.133063	0.0522718	-2.90982	-4.25782	0.166481	85888	0.239214	0.0926672	-3.58382	0.621213
173	ABCC3	HGLibA_00173	GGATGATGTAGCCACGACAA	7.38067	10.2883	0.123118	0.285699		0.0387091	0.0277694	-4.69118	-5.17036	0.0273062	37971	0.088749	0.0332393	-4.93077	1.05184
174	ABCC3	HGLibA_00174	GGCGACCCACAGGTAGATGC	6.66497	9.32375	0.164157	0.238083		0.0357215	0.0255351	-4.80706	-5.29138	0.0279076	38402	0.0896857	0.0306283	-5.04922	1.04728
175	ABCC4	HGLibA_00175	GGCACTTCGTCTTAGTAACA	1.61033	2.89358	0.0410392	0.14285		0.0887084	0.0493678	-3.49478	-4.34028	0.078482	62588	0.154751	0.0690381	-3.91753	0.810367
176	ABCC4	HGLibA_00176	CTTCCTCTAATCTCCGTTTA	3.31012	2.73282	0.0410392	0.0476165		0.0143852	0.0174239	-6.11928	-5.84279	0.00927086	22097	0.0517774	0.0159045	-5.98103	1.28586
177	ABCC4	HGLibA_00177	TGATGTGAACAAGTTTGATC	8.58841	10.9849	0.205196	0.238083		0.0277214	0.0216737	-5.17286	-5.52791	0.015336	28605	0.0661643	0.0246975	-5.35038	1.17938
178	ABCC5	HGLibA_00178	AGATCCACACAACCCTTCGC	1.20775	0.10717	0.0410392	0.0476165		0.039426	0.44431	-4.66471	-1.17036	0.381145	111258	0.422779	0.241868	-2.91753	0.373887
179	ABCC5	HGLibA_00179	GTGCCTGATGATCACGCAGC	8.76734	3.59018	0.164157	0.0476165		0.00543113	0.013263	-7.52453	-6.23645	0.143629	81033	0.218744	0.00934706	-6.88049	0.660064
180	ABCC5	HGLibA_00180	AAACATTCTCTGCCCATCGT	8.90153	3.37584	0.0410392	0.14285		0.0160478	0.0423153	-5.96148	-4.56268	0.160133	84581	0.233649	0.0291815	-5.26208	0.631437
181	ABCC6	HGLibA_00181	AGTCCTGTGTACCTCCAGCG	1.29721	4.50112	0.0410392	0.0476165		0.0367069	0.0105788	-4.7678	-6.56268	0.21668	94641	0.282549	0.0236429	-5.66524	0.548906
182	ABCC6	HGLibA_00182	ATCGTGGTGAGCCACACAGT	13.3747	16.2898	0.0410392	0.380932		0.0284816	0.0233848	-5.13382	-5.41829	0.00992299	22876	0.0535324	0.0259332	-5.27606	1.27138
183	ABCC6	HGLibA_00183	TGTTCCTGATTCACACCGAG	4.29421	5.78715	0.0820784	0.0952331		0.0221771	0.0164559	-5.49478	-5.92525	0.0219783	34215	0.079274	0.0193165	-5.71002	1.10087
184	ABCC8	HGLibA_00184	GCGTAGCTGCGAGAAGCCGA	0.447313	1.33962	0.0410392	0.0476165		0.10645	0.0355448	-3.23175	-4.81422	0.19734	91631	0.265782	0.0709975	-4.02298	0.575474
185	ABCC8	HGLibA_00185	TGATGACATTGACCTCCACG	42.1369	37.6701	0.779745	0.904714		0.0214708	0.0240168	-5.54148	-5.37981	0.0032558	13028	0.0308414	0.0227438	-5.46065	1.51087
186	ABCC8	HGLibA_00186	GATGTTGTGATAGTAGACCA	3.53377	8.03771	0.205196	0.285699		0.0808482	0.0355448	-3.62864	-4.81422	0.133067	78476	0.209261	0.0581965	-4.22143	0.679313
187	ABCC9	HGLibA_00187	CCTCTTTATGCCAGCCGTGA	8.23056	7.34111	0.205196	0.285699		0.034712	0.0389177	-4.84842	-4.68343	0.00348868	13503	0.0318849	0.0368148	-4.76593	1.49641
188	ABCC9	HGLibA_00188	TTTCTAGGCGGCGGGAATCA	0.313119	3.64376	0.0410392	0.0476165		0.152072	0.013068	-2.71718	-6.25782	0.36535	110202	0.409141	0.0825698	-4.4875	0.388127
189	ABCC9	HGLibA_00189	TCTTCATATAATATCAACGA	0.894626	0.589432	0.0410392	0.0476165		0.0532251	0.0807837	-4.23175	-3.62979	0.0446753	48319	0.114105	0.0670044	-3.93077	0.942697
190	ABCD1	HGLibA_00190	CCTGTCGTTCCGCAGCCGTC	8.40949	23.2558	0.369353	0.14285		0.0169867	0.00614254	-5.87945	-7.34695	0.170781	86686	0.243133	0.0115646	-6.6132	0.614156
191	ABCD1	HGLibA_00191	CGACGACATGATCCGCTCAA	11.5407	8.19847	0.123118	0.190466		0.0165039	0.0232319	-5.92105	-5.42775	0.0283602	38708	0.0904197	0.0198679	-5.6744	1.04374
192	ABCD1	HGLibA_00192	GCGGATCATGTCGTCGTACA	9.66196	7.23394	0.287275	0.285699		0.0295695	0.0394943	-5.07975	-4.66221	0.021418	33776	0.0782573	0.0345319	-4.87098	1.10648
193	ABCD2	HGLibA_00193	CCTTATTGCACTGTTGACGA	11.1828	14.5751	0.205196	0.333316		0.029806	0.0228689	-5.06825	-5.45047	0.0176404	30732	0.0708389	0.0263375	-5.25936	1.14973
194	ABCD2	HGLibA_00194	TTTCATAGGCGTGGTCTACT	8.58841	10.2883	0.287275	0.285699		0.0332657	0.0277694	-4.90982	-5.17036	0.0085148	21025	0.0499795	0.0305175	-5.04009	1.30121
195	ABCD2	HGLibA_00195	CAGCAGTGGACTAATTATGG	0.849895	0.643017	0.0410392	0.0476165		0.0560264	0.0740517	-4.15775	-3.75532	0.0210424	33491	0.0775392	0.0650391	-3.95654	1.11048
196	ABCD3	HGLibA_00196	CTCGAACATATTGTGATGTT	11.988	7.82337	0.205196	0.190466		0.0158881	0.0243458	-5.97591	-5.36018	0.0430597	47472	0.111941	0.0201169	-5.66805	0.951012
197	ABCD3	HGLibA_00197	GTGGTTTGCAGTGGTATCAT	4.4284	8.0913	0.0820784	0.190466		0.0430101	0.0235396	-4.53918	-5.40876	0.079057	62797	0.155366	0.0332749	-4.97397	0.808645
198	ABCD3	HGLibA_00198	ACCACCATTACAGAACAATG	1.34194	3.10792	0.0410392	0.14285		0.10645	0.0459632	-3.23175	-4.44338	0.137379	79495	0.213273	0.0762066	-3.83756	0.671065
199	ABCD4	HGLibA_00199	TACCTGCAGCCGAAGTACGC	10.6908	3.59018	0.123118	0.0952331		0.00890796	0.026526	-6.81069	-5.23645	0.186188	89599	0.25645	0.017717	-6.02357	0.590998
200	ABCD4	HGLibA_00200	GAGACCTCACCTGCGTACTT	6.30712	4.12603	0.0410392	0.14285		0.022649	0.0346216	-5.46441	-4.85218	0.0425114	47152	0.111265	0.0286353	-5.1583	0.953641
201	ABCD4	HGLibA_00201	GTCTCAGGTCATGGCGGTCG	3.66797	0.750187	0.0410392	0.14285		0.0389452	0.190419	-4.68241	-2.39275	0.284039	103421	0.338941	0.114682	-3.53758	0.469876
202	ABCE1	HGLibA_00202	TAATAACTCACAGTTGATTT	15.5218	6.43017	0.164157	0.14285		0.00920318	0.0222155	-6.76365	-5.49229	0.140247	80221	0.215754	0.0157094	-6.12797	0.666042
203	ABCE1	HGLibA_00203	ACAAATGTACCTCCTTCATC	13.7772	10.1275	0.164157	0.190466		0.0138247	0.0188068	-6.17661	-5.7326	0.0231869	35075	0.081583	0.0163157	-5.95461	1.0884
204	ABCE1	HGLibA_00204	AGACTTAAACCTGATGAAGG	0.805164	2.03622	0.123118	0.0476165		0.059139	0.0233848	-4.07975	-5.41829	0.162751	85104	0.236009	0.0412619	-4.74902	0.627072
205	ABCF1	HGLibA_00205	AAAAAGCGAGATACCCGAAA	0.0447313	1.0717	0.0410392	0.0476165		1.0645	0.044431	0.0901775	-4.49229	0.422355	115979	0.44942	0.554466	-2.20106	0.347348
206	ABCF1	HGLibA_00206	GTACCCGCCCCAAAACCCCG	0.894626	0.214339	0.0410392	0.0476165		0.0532251	0.222155	-4.23175	-2.17036	0.27245	102024	0.329563	0.13769	-3.20106	0.482062
207	ABCF1	HGLibA_00207	CTCAGTGCCAACCAGTGATG	13.8667	14.7894	0.328314	0.333316		0.0240371	0.0225375	-5.37859	-5.47153	0.0010846	7277	0.0183937	0.0232873	-5.42506	1.73533
208	ABCF2	HGLibA_00208	ATGATCAGTACGTGAAGACG	17.982	18.4867	0.0820784	0.190466		0.0105921	0.0103029	-6.56087	-6.60081	0.000203366	2575	0.00974662	0.0104475	-6.58084	2.01115
209	ABCF2	HGLibA_00209	CCTAGATGCTTGCGTGTGGT	13.3299	15.1645	0.205196	0.333316		0.0250051	0.02198	-5.32164	-5.50766	0.00429951	15013	0.0353432	0.0234925	-5.41465	1.45169
210	ABCF2	HGLibA_00210	AGATCAGATTGCACACATGA	8.45422	2.83999	0.164157	0.14285		0.0168968	0.0502993	-5.8871	-4.31332	0.189481	90267	0.259054	0.0335981	-5.10021	0.58661
211	ABCF3	HGLibA_00211	TCCGCCCCACCAGCCCGTAA	12.0327	9.4845	0.246235	0.238083		0.0197863	0.0251023	-5.65936	-5.31604	0.014363	27720	0.0639448	0.0224443	-5.4877	1.1942
212	ABCF3	HGLibA_00212	TAGGGGCGTCCAGTAGCACC	5.09937	13.5034	0.164157	0.238083		0.0466886	0.0176314	-4.42078	-5.82571	0.162718	85097	0.23598	0.03216	-5.12325	0.627124
213	ABCF3	HGLibA_00213	GCCGCCGTTACGGGCTGGTG	5.2783	6.26942	0.0820784	0.0476165		0.0090212	0.00759505	-6.79247	-7.04072	0.00745962	19808	0.0464761	0.00830812	-6.9166	1.33277
214	ABCG1	HGLibA_00214	GTCCACGCTGATGAACATCC	11.4512	15.7539	0.287275	0.333316		0.0291075	0.0211576	-5.10247	-5.56268	0.0252118	36512	0.0852162	0.0251325	-5.33257	1.06948
215	ABCG1	HGLibA_00215	ACTGAGACGGACCTGCTGAA	1.92345	2.89358	0.0410392	0.0952331		0.0495117	0.0329119	-4.33609	-4.92525	0.0404914	46140	0.108303	0.0412118	-4.63067	0.965361
216	ABCG1	HGLibA_00216	ATTTCCGGGAAGTTCAATAG	0.939358	0.696602	0.0410392	0.0476165		0.0506905	0.0683555	-4.30214	-3.8708	0.0237581	35482	0.0826337	0.059523	-4.08647	1.08284
217	ABCG2	HGLibA_00217	ACATCTCCAGATAATCCACT	2.01291	1.82188	0.123118	0.0476165		0.0236556	0.0261359	-5.40168	-5.25782	0.00312797	12776	0.030215	0.0248957	-5.32975	1.51978
218	ABCG2	HGLibA_00218	GACAGCTTCCAATGACCTGA	7.24647	3.69735	0.123118	0.14285		0.019713	0.0386357	-5.66471	-4.69392	0.0949993	68137	0.172065	0.0291743	-5.17932	0.764309
219	ABCG2	HGLibA_00219	CGAAGATTTGCCTCCACCTG	6.84389	3.64376	0.0410392	0.0476165		0.00695752	0.013068	-7.16721	-6.25782	0.0830709	64197	0.159694	0.0100127	-6.71252	0.796712
220	ABCG4	HGLibA_00220	TGATGTCGTGCTCCCACACG	43.7472	41.3674	0.656627	0.952331		0.0217689	0.0230213	-5.52159	-5.44089	0.000823689	6222	0.0163376	0.0223951	-5.48124	1.78681
221	ABCG4	HGLibA_00221	TCGTGTGGGAGCACGACATC	12.2116	8.73432	0.164157	0.14285		0.0116978	0.016355	-6.41762	-5.93413	0.0272336	37919	0.0886343	0.0140264	-6.17587	1.0524
222	ABCG4	HGLibA_00222	TCATGGCTTCCAACACCGTG	18.653	13.0747	0.205196	0.285699		0.0153166	0.0218513	-6.02876	-5.51613	0.0304483	40154	0.0935812	0.0185839	-5.77245	1.02881
223	ABCG5	HGLibA_00223	TCCTTTAAAGCCACCGCGTG	1.61033	3.91169	0.0410392	0.0952331		0.059139	0.0243458	-4.07975	-5.36018	0.144199	81183	0.219206	0.0417424	-4.71997	0.659148
224	ABCG5	HGLibA_00224	GCCGGGATTGCCGCGGCGGA	0.178925	0.160754	0.0410392	0.0476165		0.266125	0.296207	-1.90982	-1.75532	0.00587432	17563	0.0412775	0.281166	-1.83257	1.38429
225	ABCG5	HGLibA_00225	GTAGTGCAGCGTCTCGCGCA	5.994	7.12677	0.0820784	0.0476165		0.00794404	0.00668136	-6.97591	-7.22564	0.00752449	19885	0.0466987	0.0073127	-7.10078	1.33069
226	ABCG8	HGLibA_00226	CACGGCGGCAAGATCAAGTC	3.53377	4.28678	0.205196	0.0952331		0.0269494	0.0222155	-5.2136	-5.49229	0.0100856	23073	0.0539451	0.0245825	-5.35295	1.26805
227	ABCG8	HGLibA_00227	GCTGCCCATTGATCCAGATC	4.07055	4.82263	0.0820784	0.0952331		0.0233956	0.0197471	-5.41762	-5.66221	0.00736579	19673	0.0462064	0.0215714	-5.53992	1.3353
228	ABCG8	HGLibA_00228	GGTACCTGAGCTCCCTATGA	1.34194	3.05433	0.123118	0.0476165		0.0354834	0.0155898	-4.81671	-6.00325	0.132594	78362	0.208819	0.0255366	-5.40998	0.680229
229	ABHD1	HGLibA_00229	GACCCTACCGTTCCACAAGT	0.313119	0.535848	0.0410392	0.0476165		0.152072	0.0888621	-2.71718	-3.49229	0.0762028	61721	0.152367	0.120467	-3.10473	0.817108
230	ABHD1	HGLibA_00230	GGTGCAAGACGTATGTATCC	13.5089	12.4317	0.205196	0.285699		0.021149	0.0229816	-5.56326	-5.44338	0.00179668	9656	0.022963	0.0220653	-5.50332	1.63897
231	ABHD1	HGLibA_00231	GTAGAAAGTCTCGGTGGTGA	5.45722	1.0717	0.123118	0.0476165		0.00872542	0.044431	-6.84056	-4.49229	0.284212	103434	0.339104	0.0265782	-5.66642	0.469668
232	ABHD10	HGLibA_00232	TTGGAAGGTCTGGTCGATTA	0.0894626	0.589432	0.0410392	0.0952331		1.0645	0.161567	0.0901775	-2.62979	0.393425	112093	0.433149	0.613034	-1.26981	0.363362
233	ABHD10	HGLibA_00233	TGCAATTGCACGACCAGAGA	3.08646	1.01811	0.0410392	0.0476165		0.0154276	0.0467695	-6.01835	-4.41829	0.191689	90654	0.260954	0.0310985	-5.21832	0.583436
234	ABHD10	HGLibA_00234	TACAAAAGCGTTGGCGATTG	4.78625	9.10941	0.0820784	0.238083		0.049743	0.0261359	-4.32936	-5.25782	0.0883016	65973	0.16518	0.0379395	-4.79359	0.782044
235	ABHD11	HGLibA_00235	CCGCTCCCGTGCCCGAAAAC	2.54968	3.59018	0.0410392	0.0952331		0.0373509	0.026526	-4.74271	-5.23645	0.0288227	38997	0.0912131	0.0319385	-4.98958	1.03994
236	ABHD11	HGLibA_00236	GGCTAGCTTACTGCACGAAC	2.68388	11.4671	0.0820784	0.0952331		0.0354834	0.00830487	-4.81671	-6.91183	0.2526	99715	0.312627	0.0218941	-5.86427	0.504973
237	ABHD11	HGLibA_00237	GAGCCCGTGCAAAAAGACGA	4.07055	1.0717	0.0410392	0.14285		0.0350934	0.133293	-4.83265	-2.90733	0.240247	98071	0.302323	0.0841933	-3.86999	0.519528
238	ABHD12	HGLibA_00238	TGGTACCTGCGTTCCCATGC	10.2435	14.0392	0.287275	0.0952331		0.00929695	0.00678337	-6.74903	-7.20378	0.0243667	35939	0.0836729	0.00804016	-6.9764	1.07742
239	ABHD12	HGLibA_00239	GCGTTCTTCCACCAGACTGC	13.6878	13.1283	0.246235	0.238083		0.0173938	0.0181351	-5.84528	-5.78507	0.0004513	4385	0.0127013	0.0177645	-5.81518	1.89615
240	ABHD12	HGLibA_00240	TGATTCAAACCTTGATCCTG	8.00691	12.9139	0.123118	0.14285		0.0178408	0.0110617	-5.80868	-6.49829	0.0520722	51921	0.12377	0.0144512	-6.15348	0.907383
241	ABHD12B	HGLibA_00241	ACATGGTCGACCGCAACCTG	13.3747	10.449	0.246235	0.0476165		0.0035602	0.00455703	-8.13382	-7.77769	0.0151783	28464	0.0658084	0.00405862	-7.95576	1.18172
242	ABHD12B	HGLibA_00242	GCCGCATCGCCCGAGCCGCC	19.2792	7.76979	0.205196	0.285699		0.014819	0.0367705	-6.0764	-4.76531	0.147393	81863	0.2222	0.0257948	-5.42086	0.653256
243	ABHD12B	HGLibA_00243	TATGAAGCAGCCCTTCGTGA	1.61033	2.30414	0.0820784	0.0476165		0.0295695	0.0206656	-5.07975	-5.59662	0.0320763	41229	0.0960141	0.0251175	-5.33819	1.01767
244	ABHD13	HGLibA_00244	GTGTCATTGTGAGTCCCATC	4.07055	6.43017	0.123118	0.0952331		0.0233956	0.0148103	-5.41762	-6.07725	0.0488429	50407	0.119582	0.019103	-5.74743	0.922336
245	ABHD13	HGLibA_00245	GCTAATCTCTTAGTCCGAGA	0.581507	0.696602	0.0410392	0.0476165		0.0818847	0.0683555	-3.61026	-3.8708	0.00926329	22075	0.0517867	0.0751201	-3.74053	1.28578
246	ABHD13	HGLibA_00246	CGATGCGTTACCTTCCTTTA	36.1876	20.9516	0.574549	0.904714		0.0250006	0.0431811	-5.32189	-4.53346	0.0674669	58442	0.142469	0.0340909	-4.92767	0.846281
247	ABHD14A	HGLibA_00247	GAGCACCTCGCGGTAAAAGA	0.0447313	0.0535848	0.0410392	0.0476165		1.0645	0.888621	0.0901775	-0.17036	0.473465	117269	0.498263	0.976561	-0.0400912	0.302542
248	ABHD14A	HGLibA_00248	ACTCCAACCCTTATCCTGTA	16.7295	6.16225	0.205196	0.238083		0.0142313	0.0386357	-6.13479	-4.69392	0.167587	86140	0.240098	0.0264335	-5.41436	0.619611
249	ABHD14A	HGLibA_00249	CTCCCACGTGTGAGAGTTAA	0.626238	3.26867	0.0410392	0.0952331		0.152072	0.0291351	-2.71718	-5.1011	0.290926	104123	0.344818	0.0906034	-3.90914	0.462411
250	ABHD14B	HGLibA_00250	TACCTTCACACTGGCATAGT	10.6461	17.04	0.164157	0.190466		0.0178908	0.0111776	-5.80464	-6.48324	0.05061	51232	0.121913	0.0145342	-6.14394	0.913951
251	ABHD14B	HGLibA_00251	TTCGCTTCTCCTCCGAGACC	9.93035	14.3607	0.164157	0.14285		0.0143852	0.00994725	-6.11928	-6.65149	0.0324699	41483	0.0965972	0.0121662	-6.38538	1.01504
252	ABHD14B	HGLibA_00252	GTGATCAGTCCATCACTGAG	12.7484	3.69735	0.123118	0.190466		0.0149404	0.0515143	-6.06464	-4.27888	0.216645	94637	0.282514	0.0332273	-5.17176	0.548959
253	ABHD15	HGLibA_00253	TTCGTCCTGCCCGTAGCGCC	5.54668	16.129	0.205196	0.0952331		0.0171694	0.00590446	-5.86402	-7.40398	0.180836	88651	0.251742	0.0115369	-6.634	0.599044
254	ABHD15	HGLibA_00254	CCGCTGTTCGCGGTGAGCGA	5.09937	3.69735	0.123118	0.0952331		0.0186755	0.0257571	-5.74271	-5.27888	0.0256966	36846	0.0860676	0.0222163	-5.5108	1.06516
255	ABHD15	HGLibA_00255	CGGGTCGTTGCGGTCCCAGT	5.50195	7.12677	0.0820784	0.0476165		0.00865448	0.00668136	-6.85234	-7.22564	0.0164895	29696	0.0685272	0.00766792	-7.03899	1.16414
256	ABHD16A	HGLibA_00256	AGGGGAGGACCGACGGATAC	0.357851	3.1615	0.0820784	0.0476165		0.133063	0.0150614	-2.90982	-6.053	0.350219	109193	0.395821	0.074062	-4.48141	0.402501
257	ABHD16A	HGLibA_00257	GTACTATCAGCCCCGTGCCC	3.44431	1.23245	0.0410392	0.0952331		0.0276494	0.0772714	-5.17661	-3.69392	0.176585	87864	0.248026	0.0524604	-4.43527	0.605504
258	ABHD16A	HGLibA_00258	TTTACAGATCCTGTATCCGT	12.3458	7.66262	0.287275	0.190466		0.0154276	0.0248565	-6.01835	-5.33023	0.0529917	52388	0.124833	0.020142	-5.67429	0.90367
259	ABHD16B	HGLibA_00259	CGCCTCGTGGAGCGCTACCA	30.0594	8.7879	0.287275	0.190466		0.00633632	0.0216737	-7.30214	-5.52791	0.213037	94106	0.279378	0.014005	-6.41503	0.553808
260	ABHD16B	HGLibA_00260	CTTCGACGACCTTGTGCCGC	17.0426	48.7621	0.492471	0.523782		0.0307336	0.0107416	-5.02404	-6.54065	0.177835	88122	0.24905	0.0207376	-5.78234	0.603713
261	ABHD16B	HGLibA_00261	GCACCGCTACCCCGTCGTGA	7.20174	6.96602	0.123118	0.0952331		0.0132236	0.0136711	-6.24074	-6.19273	0.000289427	3310	0.0107911	0.0134474	-6.21673	1.96693
262	ABHD17A	HGLibA_00262	GACTCCAACAACCCAGCGCC	0.134194	0.643017	0.0410392	0.0476165		0.354834	0.0740517	-1.49478	-3.75532	0.308673	105725	0.360309	0.214443	-2.62505	0.443325
263	ABHD17A	HGLibA_00263	CAGAACCCCACCTGGCGAGA	0.134194	0.160754	0.0410392	0.0476165		0.354834	0.296207	-1.49478	-1.75532	0.0171423	30269	0.0698914	0.32552	-1.62505	1.15558
264	ABHD17A	HGLibA_00264	TACACGGTCCTCTTCTCGCA	9.16992	9.53809	0.205196	0.333316		0.0363488	0.0349458	-4.78195	-4.83874	0.000459991	4424	0.0128318	0.0356473	-4.81034	1.89171
265	ABHD17B	HGLibA_00265	GGCAACGTTCAAACAATGCG	3.93636	1.3932	0.0820784	0.0476165		0.0120966	0.0341777	-6.36925	-4.8708	0.177585	88075	0.248832	0.0231372	-5.62003	0.604093
266	ABHD17B	HGLibA_00266	GAGTAAAGTGTATTTCGCAT	2.05764	1.98264	0.0820784	0.0952331		0.0462827	0.0480336	-4.43338	-4.37981	0.000388362	4018	0.0119284	0.0471581	-4.4066	1.92342
267	ABHD17B	HGLibA_00267	ATCTGTCTGAACGAGCAGAC	5.2783	6.323	0.0820784	0.14285		0.0270636	0.0225921	-5.2075	-5.46804	0.00835561	20771	0.0496449	0.0248278	-5.33777	1.30413
268	ABHD17C	HGLibA_00268	CGCTGCGCATTCATACCTCG	1.25248	4.87621	0.0820784	0.0476165		0.0380179	0.00976507	-4.71718	-6.67815	0.239678	97990	0.301856	0.0238915	-5.69767	0.5202
269	ABHD17C	HGLibA_00269	GACAGCGCTCGTACATCGCT	9.30411	17.0935	0.164157	0.190466		0.0204712	0.0111426	-5.61026	-6.48777	0.0790044	62775	0.155317	0.0158069	-6.04902	0.808781
270	ABHD17C	HGLibA_00270	ACCTCAGCGAGCGCGCCGAC	6.93335	3.42942	0.123118	0.190466		0.027471	0.0555388	-5.18595	-4.17036	0.103145	70594	0.180316	0.0415049	-4.67815	0.743965
271	ABHD2	HGLibA_00271	TTACCATAGGTGAACATGCG	12.3458	3.59018	0.164157	0.0476165		0.00385689	0.013263	-8.01835	-6.23645	0.214379	94316	0.280512	0.00855994	-7.1274	0.552049
272	ABHD2	HGLibA_00272	TCGCCACGCATGTTCACCTA	12.9274	34.2942	0.574549	0.285699		0.0221004	0.00833082	-5.49979	-6.90733	0.162261	85010	0.235558	0.0152156	-6.20356	0.627902
273	ABHD2	HGLibA_00273	GATACATTCCACCGTTGATC	3.22065	5.41206	0.0820784	0.285699		0.0887084	0.0527894	-3.49478	-4.24361	0.0641599	57125	0.138609	0.0707489	-3.8692	0.858209
274	ABHD3	HGLibA_00274	TACAGAAACGTACTACCCGA	9.93035	5.03697	0.205196	0.333316		0.0335654	0.0661739	-4.89688	-3.91759	0.0983998	69152	0.175608	0.0498696	-4.40724	0.755457
275	ABHD3	HGLibA_00275	TGGACCTGCGGATGTTGTCC	12.659	15.6467	0.205196	0.285699		0.0225689	0.0182593	-5.46952	-5.77522	0.0113506	24608	0.0569241	0.0204141	-5.62237	1.2447
276	ABHD3	HGLibA_00276	CCGAGCCGAAGAACCCCACC	8.40949	4.44753	0.0410392	0.0952331		0.0113245	0.0214126	-6.46441	-5.5454	0.0848559	64847	0.16149	0.0163685	-6.00491	0.791854
277	ABHD4	HGLibA_00277	GCAAAACGACCGCACCCCCT	8.54368	8.0913	0.205196	0.14285		0.0167199	0.0176547	-5.90229	-5.8238	0.000785223	6055	0.0160042	0.0171873	-5.86305	1.79577
278	ABHD4	HGLibA_00278	CGGAATCGCTGCACCAGACC	20.9343	5.51923	0.164157	0.14285		0.00682373	0.0258822	-7.19522	-5.2719	0.231944	96976	0.29517	0.0163529	-6.23356	0.529928
279	ABHD4	HGLibA_00279	TTGGCTGTTCTTCGAGTAGC	11.9433	2.94716	0.164157	0.333316		0.0279083	0.113097	-5.16316	-3.14436	0.250808	99463	0.311196	0.0705027	-4.15376	0.506966
280	ABHD5	HGLibA_00280	ACTCGCTGAAGTACCCATCA	9.08046	4.98338	0.246235	0.0952331		0.0104877	0.0191101	-6.57516	-5.70952	0.0788511	62712	0.155171	0.0147989	-6.14234	0.809189
281	ABHD5	HGLibA_00281	GCACAACCTAGGTGGATTCT	7.51486	4.98338	0.0410392	0.0476165		0.00633632	0.00955506	-7.30214	-6.70952	0.0391841	45403	0.106507	0.00794569	-7.00583	0.97262
282	ABHD5	HGLibA_00282	TAAGTCTAGTGCAGCGTTTA	6.79916	7.12677	0.0820784	0.190466		0.0280132	0.0267254	-5.15775	-5.22564	0.000638169	5404	0.0145738	0.0273693	-5.1917	1.83643
283	ABHD6	HGLibA_00283	CCCCTTCCAGGTACTGGCGG	2.10237	3.91169	0.0410392	0.0952331		0.0452979	0.0243458	-4.46441	-5.36018	0.083178	64241	0.15979	0.0348219	-4.9123	0.79645
284	ABHD6	HGLibA_00284	GCAAGTTAAGAGGATACACC	0.805164	4.60829	0.0410392	0.14285		0.177417	0.0309984	-2.49478	-5.01166	0.303013	105243	0.355322	0.104208	-3.75322	0.449377
285	ABHD6	HGLibA_00285	AACATGTTTGTGATTGCGGG	1.11828	3.10792	0.0820784	0.0952331		0.0851601	0.0306421	-3.55368	-5.02834	0.17883	88291	0.249964	0.0579011	-4.29101	0.602123
286	ABHD8	HGLibA_00286	TGCCCTCGTCGATGAGCTTC	52.1567	42.8678	0.779745	0.857098		0.0164331	0.019994	-5.92725	-5.64429	0.00974973	22676	0.0530615	0.0182135	-5.78577	1.27522
287	ABHD8	HGLibA_00287	CCATGATGAGCGGCCAGTAC	6.44131	4.39395	0.0820784	0.14285		0.0221771	0.0325105	-5.49478	-4.94295	0.0353043	43203	0.100848	0.0273438	-5.21887	0.996332
288	ABHD8	HGLibA_00288	CAAACTTATCGTGCATGCCG	6.26238	8.03771	0.123118	0.0476165		0.00760358	0.00592414	-7.03911	-7.39918	0.0154504	28707	0.0664212	0.00676386	-7.21914	1.17769
289	ABI1	HGLibA_00289	ACAGGGCGCTCCATATTCGC	8.00691	2.51848	0.0410392	0.0476165		0.00594693	0.0189068	-7.39364	-5.72495	0.19758	91678	0.26597	0.0124269	-6.55929	0.575168
290	ABI1	HGLibA_00290	AGTAGTCTGCCACCCGAGTC	4.47313	2.62565	0.0820784	0.0476165		0.010645	0.0181351	-6.55368	-5.78507	0.0636609	56905	0.138063	0.0143901	-6.16937	0.859924
291	ABI1	HGLibA_00291	AGCGCCCTGTAAGGTATATT	5.32303	4.17961	0.0820784	0.0952331		0.0178908	0.0227852	-5.80464	-5.45576	0.0147053	28048	0.0647033	0.020338	-5.6302	1.18907
292	ABI2	HGLibA_00292	GCACTCCCCCTATCGCACAC	18.6082	3.21509	0.123118	0.333316		0.0179123	0.103672	-5.80291	-3.2699	0.299552	104967	0.352187	0.0607924	-4.5364	0.453227
293	ABI2	HGLibA_00293	GGGCTAGGTACGTAATCATT	3.80216	8.19847	0.0820784	0.14285		0.0375706	0.0174239	-4.73425	-5.84279	0.115707	74093	0.192724	0.0274973	-5.28852	0.715064
294	ABI2	HGLibA_00294	TATAACGAACTGGTCGTTCA	11.317	7.23394	0.164157	0.190466		0.0168301	0.0263295	-5.89282	-5.24718	0.0468433	49398	0.117029	0.0215798	-5.57	0.931708
295	ABI3	HGLibA_00295	AGTAGTCAGCGACCCGCAGC	0.447313	0.0535848	0.0410392	0.0476165		0.10645	0.888621	-3.23175	-0.17036	0.405026	112875	0.442832	0.497536	-1.70106	0.353761
296	ABI3	HGLibA_00296	CCTTGATGCTCTTTCGAGAC	3.22065	6.85885	0.123118	0.190466		0.059139	0.0277694	-4.07975	-5.17036	0.11531	73991	0.192328	0.0434542	-4.62505	0.715958
297	ABI3	HGLibA_00297	CGACATTGGCCATGGGATCA	9.39358	14.4143	0.164157	0.190466		0.0202762	0.0132137	-5.62407	-6.24182	0.0429012	47380	0.111745	0.016745	-5.93295	0.951772
298	ABI3BP	HGLibA_00298	GTTGCATTTGCCACCTCGCA	9.66196	4.71546	0.0820784	0.0952331		0.00985649	0.0201959	-6.66471	-5.62979	0.102945	70548	0.180084	0.0150262	-6.14725	0.744526
299	ABI3BP	HGLibA_00299	TGGCACTCTGACACCGAGCT	1.5656	1.3932	0.0410392	0.0476165		0.0304143	0.0341777	-5.03911	-4.8708	0.00359347	13704	0.0323609	0.032296	-4.95495	1.48998
300	ABI3BP	HGLibA_00300	CAAGTCACTGTCCCAATGAC	18.653	28.8286	0.328314	0.619015		0.0331859	0.0214723	-4.91329	-5.54138	0.0446732	48317	0.114104	0.0273291	-5.22733	0.942699
301	ABL1	HGLibA_00301	TGTCCCCCAACTACGACAAG	8.27529	18.3796	0.246235	0.380932		0.0460325	0.0207259	-4.4412	-5.59242	0.123438	76202	0.199911	0.0333792	-5.01681	0.699164
302	ABL1	HGLibA_00302	CCTCGTACACCTCCCCGTAC	23.7076	28.775	0.779745	0.380932		0.0160679	0.0132383	-5.95967	-6.23914	0.00966753	22575	0.0528496	0.0146531	-6.0994	1.27696
303	ABL1	HGLibA_00303	CCGGCAGGAGGTGAACGCCG	3.75743	5.57281	0.123118	0.0476165		0.0126726	0.00854443	-6.30214	-6.8708	0.0371698	44283	0.103587	0.0106085	-6.58647	0.984693
304	ABL2	HGLibA_00304	GTCCATCTCGCTCAGGTACG	18.5188	21.6482	0.328314	0.333316		0.0179988	0.0153969	-5.79595	-6.02122	0.00621681	18144	0.0422852	0.0166979	-5.90859	1.37381
305	ABL2	HGLibA_00305	TCCCTCGTACCTGAGCGAGA	7.33594	17.7366	0.205196	0.380932		0.0519269	0.0214772	-4.26737	-5.54105	0.1428	80835	0.218014	0.0367021	-4.90421	0.661516
306	ABL2	HGLibA_00306	TCTCTGTGGTGCGCCCCGCC	51.5305	58.4074	1.02598	0.904714		0.0175569	0.0154897	-5.83182	-6.01254	0.00403074	14525	0.034247	0.0165233	-5.92218	1.46538
307	ABLIM1	HGLibA_00307	CTTGATATCTCTTCCGCAGC	0.849895	2.03622	0.0410392	0.0476165		0.0560264	0.0233848	-4.15775	-5.41829	0.142408	80753	0.217636	0.0397056	-4.78802	0.66227
308	ABLIM1	HGLibA_00308	CGAAGCACTTCACCCTTGCA	7.82798	7.76979	0.0410392	0.14285		0.0182486	0.0183853	-5.77607	-5.76531	5.78744e-05	999	0.00714949	0.0183169	-5.77069	2.14572
309	ABLIM1	HGLibA_00309	CATTTATGGCAGTGAATGAC	27.8676	32.5259	0.779745	0.666632		0.0239214	0.0204954	-5.38556	-5.60856	0.00619077	18118	0.0421685	0.0222084	-5.49706	1.37501
310	ABLIM2	HGLibA_00310	CGCGCTGCTGCCCACCGATA	13.0168	5.14414	0.164157	0.0952331		0.00731616	0.0185129	-7.0947	-5.75532	0.150844	82603	0.225365	0.0129145	-6.42501	0.647114
311	ABLIM2	HGLibA_00311	CCGAGTGACCTTCAACGGGA	5.05464	2.83999	0.0410392	0.14285		0.0282611	0.0502993	-5.14504	-4.31332	0.0736508	60784	0.149535	0.0392802	-4.72918	0.825258
312	ABLIM2	HGLibA_00312	GTGATAGTCAGCTTCGCAGT	2.72861	4.17961	0.0410392	0.0476165		0.0174508	0.0113926	-5.84056	-6.45576	0.0424128	47084	0.111167	0.0144217	-6.14816	0.954023
313	ABLIM3	HGLibA_00313	GTCATCCAGTGCTACCGCTG	4.11528	1.66113	0.0410392	0.190466		0.0462827	0.114661	-4.43338	-3.12456	0.152796	83056	0.227037	0.0804717	-3.77897	0.643904
314	ABLIM3	HGLibA_00314	CTTCGCCTGTGATGAAGTCC	2.41549	2.30414	0.0820784	0.0952331		0.039426	0.0413312	-4.66471	-4.59662	0.000608722	5243	0.0143283	0.0403786	-4.63067	1.84381
315	ABLIM3	HGLibA_00315	CCACTTACTGCTAGTGTTCA	13.2852	8.89507	0.0820784	0.285699		0.0215051	0.0321188	-5.53918	-4.96044	0.0382797	44885	0.10525	0.026812	-5.24981	0.977779
316	ABO	HGLibA_00316	GATGGTCTACCCCCAGTCAA	3.89162	3.05433	0.164157	0.14285		0.0367069	0.0467695	-4.7678	-4.41829	0.015546	28770	0.0666855	0.0417382	-4.59305	1.17597
317	ABO	HGLibA_00317	GGATCATAGGTCGAAGTGCG	3.39958	5.94791	0.0820784	0.14285		0.0420198	0.0240168	-4.57279	-5.37981	0.0699804	59395	0.145405	0.0330183	-4.9763	0.837419
318	ABO	HGLibA_00318	AGCCCCAGAAGTCTAATGCC	15.0297	3.10792	0.0410392	0.190466		0.0126726	0.0612842	-6.30214	-4.02834	0.271972	101921	0.329317	0.0369784	-5.16524	0.482386
319	ABP1	HGLibA_00319	GATCCAGCGCTGGACGTAGT	19.8607	7.98413	0.164157	0.333316		0.0167827	0.0417473	-5.89688	-4.58217	0.147905	82001	0.222596	0.029265	-5.23953	0.652483
320	ABP1	HGLibA_00320	GGTGCACTACCGCGTAGACC	10.8697	14.1464	0.205196	0.238083		0.0219033	0.0168299	-5.51271	-5.89283	0.017322	30491	0.0701102	0.0193666	-5.70277	1.15422
321	ABP1	HGLibA_00321	CGGAGAGCGCATTGCCTATG	31.0435	20.8981	0.451431	0.380932		0.0122709	0.0182281	-6.34861	-5.77769	0.0372203	44326	0.103627	0.0152495	-6.06315	0.984525
322	ABR	HGLibA_00322	CGATAACTATAAAGTCGCTC	5.36776	2.51848	0.123118	0.14285		0.0266125	0.0567205	-5.23175	-4.13999	0.115987	74178	0.19297	0.0416665	-4.68587	0.71451
323	ABR	HGLibA_00323	CGACTCATCGATGTACGGCA	13.2405	18.969	0.328314	0.190466		0.0143852	0.0100409	-6.11928	-6.63797	0.0311738	40645	0.0946534	0.012213	-6.37862	1.02386
324	ABR	HGLibA_00324	ACGCTTTGTACACACCGAGC	3.35485	0.696602	0.0410392	0.0476165		0.0141933	0.0683555	-6.13864	-3.8708	0.274515	102434	0.330732	0.0412744	-5.00472	0.480524
325	ABRA	HGLibA_00325	ATGTCCACCCGCCTACACAA	2.41549	1.33962	0.0410392	0.0476165		0.019713	0.0355448	-5.66471	-4.81422	0.0763742	61794	0.15253	0.0276289	-5.23946	0.816646
326	ABRA	HGLibA_00326	CAGCATGGCTCCGGGCGAAA	3.7127	1.7683	0.0820784	0.0952331		0.0256506	0.0538558	-5.28486	-4.21475	0.112232	73178	0.189274	0.0397532	-4.74981	0.72291
327	ABRA	HGLibA_00327	GATGTGCTCCTCAGCACGCT	15.0297	27.2211	0.451431	0.333316		0.0221771	0.0122448	-5.49478	-6.35169	0.0766423	61890	0.152828	0.0172109	-5.92324	0.815798
328	ABRACL	HGLibA_00328	CTCTTAAAGCTGCAAAACGA	0.984089	1.66113	0.0410392	0.0476165		0.0483864	0.0286652	-4.36925	-5.12456	0.0635278	56849	0.13791	0.0385258	-4.74691	0.860405
329	ABRACL	HGLibA_00329	AGTGGAGGAAATTCATCGTT	0.223657	0.375093	0.0410392	0.0476165		0.2129	0.126946	-2.23175	-2.97771	0.0780994	62432	0.154381	0.169923	-2.60473	0.811406
330	ABRACL	HGLibA_00330	TGCCAACCTCTTTGAAGCAT	4.74152	5.41206	0.123118	0.14285		0.0301274	0.0263947	-5.05278	-5.24361	0.00457149	15497	0.0364053	0.028261	-5.14819	1.43884
331	ABT1	HGLibA_00331	CGAGCCCGTTCACGTCCCCC	25.4521	30.9184	0.205196	0.619015		0.0243208	0.0200209	-5.36167	-5.64235	0.00959991	22487	0.0526853	0.0221708	-5.50201	1.27831
332	ABT1	HGLibA_00332	TAGACTGGCCGCCACGCGCT	10.3329	8.84149	0.246235	0.238083		0.0230412	0.0269279	-5.43964	-5.21475	0.00630786	18269	0.0426109	0.0249845	-5.3272	1.37048
333	ABT1	HGLibA_00333	GGTCGGACGCGTCTTCTTTC	7.24647	1.82188	0.123118	0.14285		0.019713	0.0784077	-5.66471	-3.67286	0.24613	98803	0.307431	0.0490604	-4.66879	0.512252
334	ABTB1	HGLibA_00334	GCGCTCACCATCGAAGGTGT	5.54668	6.16225	0.0820784	0.285699		0.0515081	0.0463628	-4.27906	-4.43089	0.00325241	13019	0.0308306	0.0489355	-4.35497	1.51102
335	ABTB1	HGLibA_00335	ATAGTAATCCCGCCTCCTGC	4.11528	2.51848	0.0820784	0.0476165		0.0115707	0.0189068	-6.43338	-5.72495	0.0553435	53417	0.127862	0.0152387	-6.07917	0.893259
336	ABTB1	HGLibA_00336	CTGCTGCAGTACCTGTACAC	24.468	14.4679	0.410392	0.476165		0.0194607	0.0329119	-5.68329	-4.92525	0.0626554	56485	0.136892	0.0261863	-5.30427	0.863621
337	ABTB2	HGLibA_00337	TGCGTACTCGTGGATGCGCA	30.0147	11.1456	0.287275	0.0952331		0.00317288	0.00854443	-8.29999	-6.8708	0.163255	85223	0.236408	0.00585866	-7.5854	0.626337
338	ABTB2	HGLibA_00338	CGGCTCGCTCGTCATGGCCC	11.6749	20.0407	0.451431	0.380932		0.0326284	0.0190079	-4.93773	-5.71725	0.0661824	57942	0.140962	0.0258182	-5.32749	0.850897
339	ABTB2	HGLibA_00339	CGCCGGCGCTCATGCTGTAC	24.1549	3.21509	0.246235	0.0952331		0.0039426	0.0296207	-7.98664	-5.07725	0.325873	107225	0.375065	0.0167816	-6.53194	0.425893
340	ACAA1	HGLibA_00340	GATTCGGGCCATGATTGCCC	2.2813	3.96527	0.164157	0.0476165		0.0208726	0.0120084	-5.58225	-6.37981	0.0701103	59442	0.14556	0.0164405	-5.98103	0.836958
341	ACAA1	HGLibA_00341	ATTCACGTCCTTGAGAACCG	8.18583	9.91318	0.123118	0.285699		0.0349017	0.0288201	-4.84056	-5.11678	0.00948231	22342	0.0523777	0.0318609	-4.97867	1.28085
342	ACAA1	HGLibA_00342	CACCCCCGACGAGCTTCTCT	0.626238	1.55396	0.0820784	0.0952331		0.152072	0.0612842	-2.71718	-4.02834	0.163518	85276	0.236642	0.106678	-3.37276	0.625908
343	ACAA2	HGLibA_00343	CAAGCTTGGATCAGATATCA	0.0447313	0.267924	0.0410392	0.0476165		1.0645	0.177724	0.0901775	-2.49229	0.421428	114665	0.453572	0.621113	-1.20106	0.343354
344	ACAA2	HGLibA_00344	CTTACCAATACCCATGATAG	5.23356	7.34111	0.0820784	0.190466		0.0363932	0.0259451	-4.78019	-5.26839	0.0281884	38598	0.0901279	0.0311692	-5.02429	1.04514
345	ACAA2	HGLibA_00345	ATTGTGGGCTACTTTGTATC	1.61033	1.60754	0.0410392	0.0952331		0.059139	0.0592414	-4.07975	-4.07725	0.00030995	3451	0.0110841	0.0591902	-4.0785	1.9553
346	ACACA	HGLibA_00346	TGCAATTAGATTCGTTGTCA	11.988	9.96677	0.164157	0.0952331		0.00794404	0.00955506	-6.97591	-6.70952	0.00857798	21152	0.0500481	0.00874955	-6.84272	1.30061
347	ACACA	HGLibA_00347	GCAGAATTTGTTACTCGCTT	5.59141	0.482263	0.0410392	0.14285		0.025548	0.296207	-5.29064	-1.75532	0.368248	110399	0.411651	0.160878	-3.52298	0.385471
348	ACACA	HGLibA_00348	TGGCTTGCACCTAGTAAAGC	1.96818	1.60754	0.0820784	0.0476165		0.0241932	0.0296207	-5.36925	-5.07725	0.0108722	24029	0.0558389	0.026907	-5.22325	1.25306
349	ACACB	HGLibA_00349	GATCATTACGTCCCCGTCCC	33.7274	35.9554	0.410392	0.714248		0.0211771	0.0198648	-5.56135	-5.65364	0.00107399	7234	0.0183221	0.020521	-5.6075	1.73702
350	ACACB	HGLibA_00350	GGGTTGGGACCTGTAGCGTC	1.07355	0.321509	0.0410392	0.0952331		0.0887084	0.296207	-3.49478	-1.75532	0.236966	97619	0.299575	0.192458	-2.62505	0.523494
351	ACACB	HGLibA_00351	CGTTGTCGCCCAGACGCTAC	45.7154	48.8693	0.615588	0.761865		0.0166654	0.0155898	-5.907	-6.00325	0.00114546	7487	0.0188811	0.0161276	-5.95513	1.72397
352	ACAD10	HGLibA_00352	GTACAGAATCGTATCCCTTC	2.77334	2.83999	0.0820784	0.14285		0.0515081	0.0502993	-4.27906	-4.31332	0.000280078	3245	0.0106517	0.0509037	-4.29619	1.97258
353	ACAD10	HGLibA_00353	GTTAAAGACCTCCGTGCCTG	0.849895	0.589432	0.0410392	0.0476165		0.0560264	0.0807837	-4.15775	-3.62979	0.0352547	43164	0.100797	0.068405	-3.89377	0.996551
354	ACAD10	HGLibA_00354	ATAACTCAAATTCGGGCAAA	1.65506	0.482263	0.123118	0.0476165		0.0287703	0.0987357	-5.11928	-3.34028	0.236227	97522	0.298938	0.063753	-4.22978	0.524419
355	ACAD11	HGLibA_00355	CCACTCCGATAGCTGTTGCA	5.94926	10.8777	0.0820784	0.190466		0.0320151	0.0175098	-4.9651	-5.8357	0.0783899	62558	0.154643	0.0247624	-5.4004	0.810669
356	ACAD11	HGLibA_00356	CTAACTGTACCTCTTTAGGG	4.16001	1.71471	0.0410392	0.0952331		0.0228925	0.0555388	-5.44898	-4.17036	0.143559	81009	0.218702	0.0392157	-4.80967	0.660148
357	ACAD11	HGLibA_00357	CTGAGCCAATGTTTCTACCG	10.825	3.05433	0.164157	0.0952331		0.00879753	0.0311797	-6.82869	-5.00325	0.221754	95478	0.28663	0.0199886	-5.91597	0.542678
358	ACAD8	HGLibA_00358	AGACCCCTCCGAAGCCTAGC	12.1222	2.67924	0.287275	0.0952331		0.0078561	0.0355448	-6.99197	-4.81422	0.266398	101249	0.324709	0.0217005	-5.90309	0.488506
359	ACAD8	HGLibA_00359	TCTGACCTCCGCTAAGAAAC	1.29721	7.50187	0.0410392	0.0476165		0.0367069	0.00634729	-4.7678	-7.29964	0.295498	104535	0.348857	0.0215271	-6.03372	0.457353
360	ACAD8	HGLibA_00360	TCCGAAGCTATCAATCATCC	15.0297	4.9298	0.164157	0.285699		0.0190089	0.0579535	-5.71718	-4.10896	0.193149	90902	0.262225	0.0384812	-4.91307	0.581326
361	ACAD9	HGLibA_00361	CGCCAGTTTAGGCAAGTATT	24.1996	16.772	0.328314	0.238083		0.00983827	0.0141952	-6.66738	-6.13845	0.0321754	41298	0.0961498	0.0120167	-6.40291	1.01705
362	ACAD9	HGLibA_00362	CTCCCCTAGTCTTGAGTACA	5.18883	3.42942	0.0820784	0.0476165		0.00917673	0.0138847	-6.7678	-6.17036	0.0403907	46087	0.108157	0.0115307	-6.46908	0.965944
363	ACAD9	HGLibA_00363	TGACCTTGAGGCCAATAGCC	1.11828	3.21509	0.0410392	0.0476165		0.04258	0.0148103	-4.55368	-6.07725	0.180228	88538	0.251215	0.0286952	-5.31546	0.599954
364	ACADL	HGLibA_00364	TGTACTCCGCAGCTATTGTC	7.20174	12.5924	0.123118	0.238083		0.033059	0.0189068	-4.91881	-5.72495	0.0691006	59113	0.144262	0.0259829	-5.32188	0.840847
365	ACADL	HGLibA_00365	CGCGTAGGGACCCTCGGAGA	3.22065	1.23245	0.0410392	0.0476165		0.0147847	0.0386357	-6.07975	-4.69392	0.159352	84417	0.232959	0.0267102	-5.38683	0.63272
366	ACADL	HGLibA_00366	CTCACCGCGCGGCGGGCAGC	2.8628	6.10866	0.164157	0.14285		0.0498985	0.0233848	-4.32486	-5.41829	0.116354	74323	0.193202	0.0366416	-4.87157	0.713987
367	ACADM	HGLibA_00367	GCCAATCGACAACGTGAACC	9.93035	9.64526	0.0820784	0.190466		0.0191802	0.0197471	-5.70424	-5.66221	0.000249572	2995	0.0102838	0.0194637	-5.68323	1.98785
368	ACADM	HGLibA_00368	TCCCCCTAATTAGAAGAGCC	2.72861	0.696602	0.0410392	0.0476165		0.0174508	0.0683555	-5.84056	-3.8708	0.242294	98305	0.304174	0.0429031	-4.85568	0.516878
369	ACADM	HGLibA_00369	TGCTCGTAAATTTGCCAGAG	0.581507	1.7683	0.0410392	0.0476165		0.0818847	0.0269279	-3.61026	-5.21475	0.197034	91583	0.265509	0.0544063	-4.41251	0.575921
370	ACADS	HGLibA_00370	TGGCGTAGGCCAGGTAATCG	9.08046	4.28678	0.205196	0.190466		0.0209754	0.044431	-5.57516	-4.49229	0.113739	73582	0.190761	0.0327032	-5.03372	0.71951
371	ACADS	HGLibA_00371	CAGAACCCATGAGTCGCCCT	6.7097	2.78641	0.0820784	0.0952331		0.0141933	0.0341777	-6.13864	-4.8708	0.140768	80352	0.216203	0.0241855	-5.50472	0.665139
372	ACADS	HGLibA_00372	GGCAGGTACCTGGTTCGCTG	11.4959	9.43092	0.328314	0.190466		0.0165681	0.0201959	-5.91545	-5.62979	0.0101284	23124	0.0540546	0.018382	-5.77262	1.26717
373	ACADSB	HGLibA_00373	ATCCACTGTGCTCGTGATAG	2.32603	7.71621	0.123118	0.238083		0.102356	0.0308549	-3.28833	-5.01836	0.214394	94318	0.280526	0.0666054	-4.15335	0.552027
374	ACADSB	HGLibA_00374	TTCCTCTATCACGAGCACAG	2.77334	6.96602	0.123118	0.14285		0.0515081	0.0205066	-4.27906	-5.60777	0.152345	82921	0.226735	0.0360074	-4.94341	0.644482
375	ACADSB	HGLibA_00375	TATTGAGTAGAGCTTCTGAC	2.05764	2.78641	0.0820784	0.14285		0.069424	0.0512666	-3.84842	-4.28584	0.0241604	35821	0.0832376	0.0603453	-4.06713	1.07968
376	ACADVL	HGLibA_00376	TGTCTAACCGAGCCCTCAAG	2.01291	1.7683	0.123118	0.0952331		0.0473112	0.0538558	-4.40168	-4.21475	0.004741	15780	0.037078	0.0505835	-4.30821	1.43088
377	ACADVL	HGLibA_00377	GCTGGCAGGAACCCGGATAA	1.20775	0.643017	0.0410392	0.0952331		0.0788519	0.148103	-3.66471	-2.75532	0.0942668	67886	0.171369	0.113478	-3.21002	0.766068
378	ACADVL	HGLibA_00378	CGATGACAGCAAAGACGATG	8.58841	1.66113	0.0820784	0.190466		0.0221771	0.114661	-5.49478	-3.12456	0.286517	103679	0.341046	0.0684189	-4.30967	0.467187
379	ACAN	HGLibA_00379	GCTACACCCTCGACTTTGAC	13.8667	16.5577	0.246235	0.523782		0.0377726	0.0316338	-4.72652	-4.98239	0.00821976	20592	0.0492623	0.0347032	-4.85445	1.30749
380	ACAN	HGLibA_00380	GCGGGTCAACAGTGCCTATC	1.74452	7.82337	0.0410392	0.0476165		0.0272949	0.00608644	-5.19522	-7.36018	0.259256	100507	0.318336	0.0166907	-6.2777	0.497114
381	ACAN	HGLibA_00381	CCCCAGAGTCATTGGAGCGC	5.05464	7.12677	0.123118	0.0476165		0.00942036	0.00668136	-6.73	-7.22564	0.0285346	38826	0.0906992	0.00805086	-6.97782	1.0424
382	ACAP1	HGLibA_00382	GCCAGCCGCGCCTTCGTTGT	12.9721	6.85885	0.205196	0.190466		0.0146828	0.0277694	-6.08973	-5.17036	0.0863201	65361	0.162985	0.0212261	-5.63005	0.787853
383	ACAP1	HGLibA_00383	AAATGCCGACAACGAAGGCG	3.22065	8.14488	0.0410392	0.14285		0.0443542	0.0175386	-4.49478	-5.83333	0.151213	82688	0.225685	0.0309464	-5.16405	0.646498
384	ACAP1	HGLibA_00384	GGCTTCCACCAGCTCAATAG	1.47613	0.857356	0.0410392	0.0952331		0.0645152	0.111078	-3.95422	-3.17036	0.0714572	59992	0.146996	0.0877964	-3.56229	0.832694
385	ACAP2	HGLibA_00385	AGCCCTCGATTATGTGCTTC	17.1768	25.292	152.173	1.61896		0.0942527	0.0640108	-3.40732	-3.96554	0.537187	123146	0.538343	0.0791318	-3.68643	0.268941
386	ACAP2	HGLibA_00386	CATTACTAGAATACTGAGCC	0.134194	1.23245	0.0410392	0.0952331		0.709667	0.0772714	-0.494785	-3.69392	0.379519	111172	0.421301	0.393469	-2.09435	0.375408
387	ACAP2	HGLibA_00387	TAGTAATGATGCTGTCGTTG	9.97508	14.5215	0.0820784	0.238083		0.0238677	0.0163952	-5.38879	-5.93058	0.0336289	42239	0.0982547	0.0201315	-5.65969	1.00765
388	ACAP3	HGLibA_00388	TTTGACGTGGACGCGCCCAG	4.69679	12.9675	0.0820784	0.14285		0.0304143	0.011016	-5.03911	-6.50426	0.169506	86484	0.241881	0.0207151	-5.77168	0.616398
389	ACAP3	HGLibA_00389	GTCCACGTCAAACTCCACTT	13.2852	26.4173	0.328314	0.380932		0.0286734	0.0144198	-5.12414	-6.1158	0.0971711	68782	0.174348	0.0215466	-5.61997	0.758584
390	ACAP3	HGLibA_00390	GGTAGTTCACCACCTCCTGT	5.18883	6.69809	0.205196	0.0952331		0.0183535	0.0142179	-5.7678	-6.13614	0.0166334	29821	0.0688357	0.0162857	-5.95197	1.16219
391	ACAT1	HGLibA_00391	TGCTCCATCATTCAGTGTAC	26.9283	24.649	0.53351	0.476165		0.0176827	0.0193178	-5.82151	-5.69392	0.00202674	10252	0.0243974	0.0185003	-5.75772	1.61266
392	ACAT1	HGLibA_00392	AATGCCAGTACACTGAATGA	10.6908	7.76979	0.246235	0.14285		0.0133619	0.0183853	-6.22573	-5.76531	0.0251751	36489	0.0851459	0.0158736	-5.99552	1.06984
393	ACAT1	HGLibA_00393	TCCTACAAGGCAGGCAGTAT	17.3558	38.3667	0.492471	0.285699		0.0164614	0.00744654	-5.92477	-7.06921	0.120399	75445	0.196946	0.011954	-6.49699	0.705653
394	ACAT2	HGLibA_00394	TCGGCGGCGCGGACCATCAT	7.02282	7.0196	0.0820784	0.14285		0.0203408	0.0203501	-5.61948	-5.61882	1.93971e-05	369	0.0064873	0.0203454	-5.61915	2.18794
395	ACAT2	HGLibA_00395	GCCGCCGAGACGATGACCAC	17.982	11.7351	0.246235	0.523782		0.0291281	0.0446339	-5.10144	-4.48572	0.0436325	47765	0.112734	0.036881	-4.79358	0.947946
396	ACAT2	HGLibA_00396	TGCCTTGCAGTCCAGTCAAT	121.714	441.967	2893.14	2769.85		22.7571	6.2671	4.50824	2.6478	0.00449825	15376	0.0361039	14.5121	3.57802	1.44245
397	ACBD3	HGLibA_00397	TATGCAGCCCAACAGTATCC	3.48904	1.33962	0.0410392	0.0476165		0.0136475	0.0355448	-6.19522	-4.81422	0.158225	84181	0.231961	0.0245961	-5.50472	0.634585
398	ACBD3	HGLibA_00398	GATAGTGTTGCTCCTGCAAC	4.4284	2.19698	0.164157	0.0476165		0.0107525	0.0216737	-6.53918	-5.52791	0.102971	70553	0.180116	0.0162131	-6.03355	0.744449
399	ACBD3	HGLibA_00399	AAGGCTTCGACGGGAGGAAG	2.10237	1.44679	0.123118	0.0476165		0.022649	0.0329119	-5.46441	-4.92525	0.0361013	43648	0.102073	0.0277804	-5.19483	0.991088
400	ACBD4	HGLibA_00400	TCACCACTTATATCGTCCAA	8.18583	8.30564	0.246235	0.14285		0.0174508	0.0171991	-5.84056	-5.86152	9.65675e-05	1474	0.00808514	0.017325	-5.85104	2.09231
401	ACBD4	HGLibA_00401	ATTCTACAGTTACTACAAGC	1.07355	1.33962	0.0410392	0.0476165		0.0443542	0.0355448	-4.49478	-4.81422	0.0128572	26163	0.0606473	0.0399495	-4.6545	1.21719
402	ACBD4	HGLibA_00402	CAGCCTCACCGTTCTTGGGC	7.02282	13.6641	0.205196	0.14285		0.0203408	0.0104544	-5.61948	-6.57975	0.0921332	67233	0.169117	0.0153976	-6.09962	0.771813
403	ACBD5	HGLibA_00403	GAAGAATTGCTGCGTGTCAT	6.79916	3.96527	0.0410392	0.0952331		0.0140066	0.0240168	-6.15775	-5.37981	0.0643352	57209	0.138784	0.0190117	-5.76878	0.857662
404	ACBD5	HGLibA_00404	TAGGGATGCTTGGAGTTCAC	20.6659	16.5041	0.328314	0.285699		0.0138247	0.0173108	-6.17661	-5.85218	0.0127156	26033	0.0602792	0.0155677	-6.0144	1.21983
405	ACBD5	HGLibA_00405	AGGAGTTCTGATATAACCTC	8.58841	4.60829	0.0410392	0.0952331		0.0110886	0.0206656	-6.49478	-5.59662	0.0816701	63713	0.158194	0.0158771	-6.0457	0.800811
406	ACBD6	HGLibA_00406	GCCATCACCGGCGACAGCGG	1.69979	0.428678	0.0410392	0.0952331		0.0560264	0.222155	-4.15775	-2.17036	0.25787	100364	0.317086	0.139091	-3.16405	0.498823
407	ACBD6	HGLibA_00407	CAGCTCTCCACCGCTGTCGC	0.939358	0.910941	0.0410392	0.0476165		0.0506905	0.0522718	-4.30214	-4.25782	0.00027403	3201	0.0105649	0.0514812	-4.27998	1.97613
408	ACBD6	HGLibA_00408	CTTACCTGAGGATTCCAACC	0.223657	1.28603	0.0410392	0.0952331		0.4258	0.0740517	-1.23175	-3.75532	0.32577	107220	0.374964	0.249926	-2.49354	0.42601
409	ACBD7	HGLibA_00409	TATCTTTCTAGGGTTGTCGA	3.84689	6.85885	0.164157	0.190466		0.0495117	0.0277694	-4.33609	-5.17036	0.0752428	61396	0.151244	0.0386405	-4.75322	0.820321
410	ACBD7	HGLibA_00410	GAGGTTCCATGCTTCCCATT	11.2276	9.64526	0.0820784	0.0476165		0.00424104	0.00493678	-7.88137	-7.66221	0.00577119	17388	0.0409609	0.00458891	-7.77179	1.38763
411	ACBD7	HGLibA_00411	CTTTACAAACAAGCAATAGT	1.5656	1.92905	0.0410392	0.0476165		0.0304143	0.0246839	-5.03911	-5.34028	0.0111999	24380	0.0566935	0.0275491	-5.1897	1.24647
412	ACCS	HGLibA_00412	CTGTGTACAGCGTGCCAAAG	7.73852	1.17886	0.0820784	0.14285		0.0184596	0.121176	-5.75949	-3.04483	0.316263	106369	0.366933	0.0698176	-4.40216	0.435413
413	ACCS	HGLibA_00413	CTGCAGGACTTCGGGATGTC	9.79616	11.0385	0.246235	0.380932		0.0388859	0.0345096	-4.68461	-4.85686	0.00380211	14086	0.0333113	0.0366977	-4.77074	1.47741
414	ACCS	HGLibA_00414	GACTTACCCGCCAGGACAGC	8.72261	8.0913	0.0820784	0.14285		0.0163769	0.0176547	-5.93219	-5.8238	0.00145847	8599	0.0209317	0.0170158	-5.878	1.6792
415	ACCSL	HGLibA_00415	ACCGGGCCACTTCTTCCCGC	1.87872	4.60829	0.123118	0.14285		0.0760358	0.0309984	-3.71718	-5.01166	0.150297	82480	0.224882	0.0535171	-4.36442	0.648045
416	ACCSL	HGLibA_00416	CTTCAGGTGGTGGTTCTAAA	2.19183	0.803771	0.0820784	0.0476165		0.0217245	0.0592414	-5.52453	-4.07725	0.17506	87579	0.246684	0.040483	-4.80089	0.607859
417	ACCSL	HGLibA_00417	GGTTCCTGACCTACTACTGC	1.16301	0.267924	0.0410392	0.0476165		0.0409424	0.177724	-4.61026	-2.49229	0.272493	102038	0.329569	0.109333	-3.55128	0.482054
418	ACD	HGLibA_00418	GACCCACAGTGTCCGATGCC	2.63915	2.51848	0.0410392	0.14285		0.0541272	0.0567205	-4.2075	-4.13999	0.00100604	6943	0.0178822	0.0554238	-4.17374	1.74758
419	ACD	HGLibA_00419	CCCCGACGTCGGACGTATCA	7.55959	3.48301	0.205196	0.0952331		0.0125976	0.0273422	-6.3107	-5.19273	0.118948	75012	0.195695	0.0199699	-5.75171	0.70842
420	ACD	HGLibA_00420	ACCAACCAGGCACCCGTAGC	0.0447313	1.92905	0.0410392	0.0476165		1.0645	0.0246839	0.0901775	-5.34028	0.422487	116258	0.448482	0.544593	-2.62505	0.348255
421	ACE	HGLibA_00421	GAGCATGGCGTAGCTTCGCG	8.05164	12.0566	0.328314	0.285699		0.0354834	0.0236966	-4.81671	-5.39918	0.0397138	45703	0.107238	0.02959	-5.10795	0.96965
422	ACE	HGLibA_00422	CCCGCTGAAACCGCTGTACG	0.492044	2.57207	0.0410392	0.0476165		0.0967728	0.0185129	-3.36925	-5.75532	0.28886	103922	0.343032	0.0576429	-4.56229	0.464666
423	ACE	HGLibA_00423	AGGAGCTGTATGAACCGATC	2.72861	4.17961	0.0820784	0.0952331		0.0349017	0.0227852	-4.84056	-5.45576	0.0434676	47703	0.112454	0.0288434	-5.14816	0.949026
424	ACE2	HGLibA_00424	CAAGTGAACTTTGATAGAAC	1.52086	0.696602	0.0410392	0.0476165		0.0313089	0.0683555	-4.99729	-3.8708	0.122894	76069	0.199378	0.0498322	-4.43404	0.700323
425	ACE2	HGLibA_00425	ATGAGCACCATCTACAGTAC	27.9571	30.061	0.451431	0.380932		0.0136256	0.012672	-6.19753	-6.30222	0.00135242	8233	0.0202725	0.0131488	-6.24988	1.69309
426	ACE2	HGLibA_00426	TGCTGCTCAGTCCACCATTG	18.2056	17.9509	0.287275	0.380932		0.0209239	0.0212208	-5.57871	-5.55838	5.84899e-05	1014	0.00711864	0.0210723	-5.56854	2.1476
427	ACER1	HGLibA_00427	CATTCTCTACATCGTGTGCC	25.3627	37.9916	0.246235	0.619015		0.0244066	0.0162935	-5.35659	-5.93956	0.0385321	45032	0.105598	0.02035	-5.64807	0.976344
428	ACER1	HGLibA_00428	GAGGGCGTAGGCGTTGACCG	28.4938	11.4136	0.287275	0.285699		0.0100267	0.0250316	-6.64001	-5.32011	0.147853	81985	0.222561	0.0175291	-5.98006	0.652552
429	ACER1	HGLibA_00429	GCACCTGATTGAGGTCTCCG	2.68388	1.92905	0.0410392	0.14285		0.0532251	0.0740517	-4.23175	-3.75532	0.0283233	38687	0.0903509	0.0636384	-3.99354	1.04407
430	ACER2	HGLibA_00430	TATCGCCGAGTTCTACAACA	11.3618	4.9298	0.246235	0.333316		0.0293366	0.0676125	-5.09115	-3.88657	0.134587	78843	0.210666	0.0484746	-4.48886	0.676405
431	ACER2	HGLibA_00431	CCGCACCGTGTTGTAGAACT	0.626238	0.428678	0.0410392	0.0476165		0.0760358	0.111078	-3.71718	-3.17036	0.0393933	45523	0.106794	0.0935567	-3.44377	0.971454
432	ACER2	HGLibA_00432	CTACTTAATCTGGACTCTTT	2.77334	4.87621	0.164157	0.0952331		0.0343387	0.0195301	-4.86402	-5.67815	0.0723671	60297	0.148115	0.0269344	-5.27109	0.8294
433	ACER3	HGLibA_00433	CTCTGAACTGCACCGAACAT	17.5794	14.6286	0.369353	0.619015		0.0352125	0.0423153	-4.82777	-4.56268	0.00887764	21561	0.0508139	0.0387639	-4.69522	1.29402
434	ACER3	HGLibA_00434	ATGATTATACCTCCAATGTT	9.21465	4.82263	0.0820784	0.0952331		0.010335	0.0197471	-6.59632	-5.66221	0.0874464	65728	0.164189	0.015041	-6.12927	0.784655
435	ACER3	HGLibA_00435	ACACAGGAACTTTCGAAAGA	2.19183	1.55396	0.0820784	0.0952331		0.043449	0.0612842	-4.52453	-4.02834	0.0305108	40204	0.0936565	0.0523666	-4.27644	1.02846
436	ACHE	HGLibA_00436	CCCAGCGACTGATGCGATAC	17.0874	16.129	0.164157	0.428549		0.0250799	0.0265701	-5.31733	-5.23405	0.000927332	6654	0.0171991	0.025825	-5.27569	1.76449
437	ACHE	HGLibA_00437	CCACAATGTCGTGTGCCCCG	27.1519	22.5592	0.451431	0.285699		0.0105223	0.0126644	-6.57041	-6.30307	0.0086913	21304	0.0503475	0.0115933	-6.43674	1.29802
438	ACHE	HGLibA_00438	GGCTCAGCAGTACGTTAGTC	3.22065	6.69809	0.0410392	0.190466		0.059139	0.0284359	-4.07975	-5.13614	0.108491	72068	0.185782	0.0437874	-4.60795	0.730995
439	ACIN1	HGLibA_00439	TTTCGATCTTCAGTCAGTCG	28.4938	5.78715	0.164157	0.333316		0.0116978	0.0575958	-6.41762	-4.11789	0.2752	102494	0.331363	0.0346468	-5.26775	0.479695
440	ACIN1	HGLibA_00440	GGTTGGCATGAGTACGTGCC	4.65206	12.003	0.0410392	0.14285		0.0307068	0.0119012	-5.0253	-6.39275	0.154371	83395	0.228444	0.021304	-5.70903	0.641221
441	ACIN1	HGLibA_00441	AAGGAGAAAGACGATCATCT	3.62324	1.28603	0.0410392	0.0476165		0.013142	0.0370259	-6.24967	-4.75532	0.175251	87612	0.246861	0.0250839	-5.5025	0.607548
442	ACKR2	HGLibA_00442	GCATCTAGACTACGCACTCC	62.4002	21.1124	0.779745	0.523782		0.00839392	0.0248092	-6.89644	-5.33298	0.184722	89322	0.25522	0.0166016	-6.11471	0.593086
443	ACKR2	HGLibA_00443	CATGCCCGCCGAAATCTGCG	26.1231	14.0928	0.246235	0.571398		0.0218733	0.0405454	-5.51468	-4.62432	0.0819948	63824	0.158546	0.0312094	-5.0695	0.799844
444	ACKR2	HGLibA_00444	TGCTCCGTTACGTGCCTCGC	69.5572	68.8028	1.35429	1.61896		0.0232753	0.0235305	-5.42506	-5.40933	3.48662e-05	639	0.00673376	0.0234029	-5.41719	2.17174
445	ACKR3	HGLibA_00445	TTTGCACGTGAGCTCGCCCA	67.8574	64.6768	1.27222	1.23803		0.0182446	0.0191418	-5.77639	-5.70713	0.000597905	5181	0.0142421	0.0186932	-5.74176	1.84643
446	ACKR3	HGLibA_00446	CATCTCGGCGTCCAGTGACC	10.3329	9.8596	0.246235	0.0476165		0.00460823	0.00482946	-7.76157	-7.69392	0.000664808	5518	0.0148686	0.00471885	-7.72775	1.82773
447	ACKR3	HGLibA_00447	ACTGGACGCCGAGATGGCTC	15.0745	19.8264	0.205196	0.428549		0.0284288	0.0216151	-5.1365	-5.53182	0.0187328	31698	0.072933	0.025022	-5.33416	1.13708
448	ACKR4	HGLibA_00448	ACTAAAGTCCCCAGCCAATC	3.26539	2.35773	0.0820784	0.0476165		0.0145822	0.0201959	-6.09965	-5.62979	0.0262667	37243	0.087039	0.0173891	-5.86472	1.06029
449	ACKR4	HGLibA_00449	CAATGACGAAAACTATTGTG	2.54968	6.91243	0.205196	0.14285		0.0560264	0.0206656	-4.15775	-5.59662	0.171931	86919	0.244115	0.038346	-4.87719	0.612406
450	ACKR4	HGLibA_00450	TGTGCTACTTTATCACAGCA	4.33894	8.30564	0.0820784	0.0952331		0.0219485	0.0114661	-5.50974	-6.44648	0.0880654	65901	0.164918	0.0167073	-5.97811	0.782733
451	ACLY	HGLibA_00451	GACCAGCTGATCAAACGTCG	4.69679	3.96527	0.164157	0.0952331		0.0202762	0.0240168	-5.62407	-5.37981	0.00755971	19935	0.0467996	0.0221465	-5.50194	1.32976
452	ACLY	HGLibA_00452	GAGAGCAATTCGAGATTACC	1.69979	3.53659	0.0820784	0.0952331		0.0560264	0.0269279	-4.15775	-5.21475	0.110419	72607	0.18768	0.0414771	-4.68625	0.726583
453	ACLY	HGLibA_00453	TTCCACGACGTTTGATCAGC	17.5794	23.0414	0.451431	0.285699		0.0162519	0.0123994	-5.94325	-6.33359	0.0182597	31274	0.0720551	0.0143256	-6.13842	1.14234
454	ACMSD	HGLibA_00454	TCAGGTCCCACTCGTTGACG	6.03873	16.2898	0.0410392	0.190466		0.0315408	0.0116924	-4.98664	-6.41829	0.16391	85355	0.23699	0.0216166	-5.70246	0.625271
455	ACMSD	HGLibA_00455	CCGCTACTCACCGCATAGAC	8.49895	5.84074	0.287275	0.0952331		0.0112053	0.016305	-6.47968	-5.93854	0.034582	42731	0.099876	0.0137551	-6.20911	1.00054
456	ACMSD	HGLibA_00456	GAGTGGTGCGAGAGAATTGC	3.62324	5.67998	0.0410392	0.0952331		0.026284	0.0167664	-5.24967	-5.89828	0.0468622	49413	0.11704	0.0215252	-5.57398	0.931665
457	ACN9	HGLibA_00457	TAAATTCGTCTTTCACGTAC	12.8379	15.5932	0.205196	0.238083		0.0185453	0.0152684	-5.7528	-6.03331	0.00955425	22446	0.0525305	0.0169069	-5.89305	1.27959
458	ACN9	HGLibA_00458	ACTCGAGAAACGTGCCGCCC	22.1867	21.9698	0.287275	0.238083		0.0107309	0.0108368	-6.54209	-6.52791	2.60017e-05	496	0.00646955	0.0107838	-6.535	2.18913
459	ACN9	HGLibA_00459	TGCAACAGCGTTATTGCAAC	15.3428	10.3954	0.410392	0.0952331		0.006207	0.00916104	-7.33189	-6.77027	0.0364997	43872	0.102673	0.00768402	-7.05108	0.988544
460	ACO1	HGLibA_00460	AATGGTGAGCACGATGTCAG	4.87571	7.50187	0.164157	0.190466		0.0390643	0.0253892	-4.67801	-5.29964	0.0445512	48265	0.113915	0.0322267	-4.98882	0.943419
461	ACO1	HGLibA_00461	ATGACACGAGCAGGCTTAAA	1.34194	2.83999	0.0410392	0.0476165		0.0354834	0.0167664	-4.81671	-5.89828	0.111904	73099	0.188925	0.0261249	-5.3575	0.723711
462	ACO1	HGLibA_00462	CGCACACCTTGCTGAGCCAT	35.293	45.4935	0.738706	0.571398		0.0161901	0.01256	-5.94874	-6.31502	0.0160807	29302	0.0677269	0.0143751	-6.13188	1.16924
463	ACO2	HGLibA_00463	CACATAGCCGTCCCGCTCAA	4.02582	4.87621	0.205196	0.0476165		0.0118278	0.00976507	-6.40168	-6.67815	0.00985132	22785	0.053358	0.0107964	-6.53992	1.2728
464	ACO2	HGLibA_00464	TCTCGGGGTTTGCGTCGTTG	3.22065	7.55545	0.123118	0.14285		0.0443542	0.0189068	-4.49478	-5.72495	0.136202	79201	0.212231	0.0316305	-5.10987	0.673192
465	ACO2	HGLibA_00465	GCGCGGATCTGCTCGGAACC	5.18883	2.62565	0.123118	0.14285		0.0275302	0.0544054	-5.18284	-4.20011	0.0985562	69203	0.175757	0.0409678	-4.69147	0.755087
466	ACOT1	HGLibA_00466	AGTAGCGCTCGTGCCGCACC	44.5971	33.0618	0.492471	1.04756		0.0234895	0.031685	-5.41184	-4.98006	0.0222532	34430	0.0797643	0.0275873	-5.19595	1.09819
467	ACOT1	HGLibA_00467	CGCTACCGCGCCGACACCCT	6.53077	12.0566	0.0820784	0.0952331		0.0145822	0.00789885	-6.09965	-6.98414	0.0794967	62974	0.155791	0.0112405	-6.54189	0.807458
468	ACOT1	HGLibA_00468	TGGGGGAACCTTACGCTACA	5.90453	2.19698	0.0410392	0.0952331		0.0161288	0.0433474	-5.95422	-4.52791	0.164754	85555	0.237654	0.0297381	-5.24106	0.624056
469	ACOT11	HGLibA_00469	ACTGTCGTTCCCCGCACGTA	18.2951	21.3803	0.0820784	0.238083		0.0130135	0.0111356	-6.26385	-6.48868	0.00610494	17976	0.0419124	0.0120745	-6.37626	1.37766
470	ACOT11	HGLibA_00470	CTTACCGGACAGGCAAGCCG	4.78625	5.41206	0.0410392	0.0476165		0.00994861	0.00879823	-6.65129	-6.82857	0.00381042	14106	0.0333367	0.00937342	-6.73993	1.47708
471	ACOT11	HGLibA_00471	CATAGACAAGGCGCATGCGC	17.4452	9.4845	0.164157	0.428549		0.0245654	0.0451841	-5.34723	-4.46804	0.0805653	63340	0.156973	0.0348748	-4.90763	0.804176
472	ACOT12	HGLibA_00472	ATGACCACCTCGCCGGGCGC	1.96818	1.33962	0.0820784	0.0952331		0.0483864	0.0710897	-4.36925	-3.81422	0.038046	44778	0.104857	0.059738	-4.09174	0.979402
473	ACOT12	HGLibA_00473	GCTCAGCTCGCCGCGCGCAG	2.997	2.89358	0.0820784	0.0952331		0.0317762	0.0329119	-4.97591	-4.92525	0.000332815	3611	0.0113744	0.032344	-4.95058	1.94407
474	ACOT12	HGLibA_00474	TAGAGCATTCAGCACAAGCA	0.894626	1.50037	0.0410392	0.0476165		0.0532251	0.0317365	-4.23175	-4.97771	0.0625832	56453	0.136812	0.0424808	-4.60473	0.863875
475	ACOT13	HGLibA_00475	TCTCTCAAAATTGCGAGCCT	0.760432	0.482263	0.0820784	0.0476165		0.0626177	0.0987357	-3.99729	-3.34028	0.0579631	54587	0.131044	0.0806767	-3.66879	0.882583
476	ACOT13	HGLibA_00476	GGTGATAAAGGCCATGACCA	6.21765	1.17886	0.0410392	0.0952331		0.0153166	0.0807837	-6.02876	-3.62979	0.286342	103663	0.340891	0.0480501	-4.82928	0.467384
477	ACOT13	HGLibA_00477	TGATATGTTATCTACTAACG	8.63314	5.94791	0.205196	0.14285		0.0165467	0.0240168	-5.91732	-5.37981	0.0338167	42331	0.0985884	0.0202817	-5.64857	1.00617
478	ACOT2	HGLibA_00478	GGTACAGCCGGGACGCTCGA	2.23657	0.0535848	0.0820784	0.0476165		0.02129	0.888621	-5.55368	-0.17036	0.42669	116434	0.452258	0.454955	-2.86202	0.344614
479	ACOT2	HGLibA_00479	GGAACTGCGCCGAACTCTTC	1.29721	1.01811	0.0820784	0.0476165		0.0367069	0.0467695	-4.7678	-4.41829	0.0161551	29369	0.067885	0.0417382	-4.59305	1.16823
480	ACOT2	HGLibA_00480	TGGGGGAACCTTACACTACA	6.5755	2.4649	0.0820784	0.0952331		0.014483	0.0386357	-6.10949	-4.69392	0.163818	85336	0.23691	0.0265594	-5.40171	0.625417
481	ACOT4	HGLibA_00481	ATAAGGAATGCTCTCGTAGG	4.24947	1.0717	0.0820784	0.0476165		0.0112053	0.044431	-6.47968	-4.49229	0.243954	98498	0.305657	0.0278182	-5.48598	0.514766
482	ACOT4	HGLibA_00482	CCGCGCACGGCAATGCGCAC	2.05764	10.3419	0.123118	0.238083		0.115707	0.0230213	-3.11146	-5.44089	0.283388	103353	0.338386	0.069364	-4.27617	0.470587
483	ACOT4	HGLibA_00483	CGCAGCGTAACCCGCTGCTC	1.07355	0.643017	0.0820784	0.0476165		0.0443542	0.0740517	-4.49478	-3.75532	0.0667488	58159	0.141638	0.059203	-4.12505	0.848819
484	ACOT6	HGLibA_00484	GGTCCTAGTATTGCGCTTCT	6.62023	6.85885	0.205196	0.238083		0.0359629	0.0347118	-4.79735	-4.84843	0.000341246	3674	0.0114626	0.0353373	-4.82289	1.94072
485	ACOT6	HGLibA_00485	AATCCAAGAAGCGCAATACT	1.47613	2.08981	0.0820784	0.0952331		0.0645152	0.0455703	-3.95422	-4.45576	0.03128	40705	0.094836	0.0550428	-4.20499	1.02303
486	ACOT6	HGLibA_00486	CTTTATGCTGCAGCATCCAA	4.74152	2.08981	0.0820784	0.0476165		0.0100425	0.0227852	-6.63774	-5.45576	0.127355	77153	0.203712	0.0164138	-6.04675	0.690983
487	ACOT7	HGLibA_00487	CGGTGCGCTCGACACGAGCC	4.78625	13.6105	0.287275	0.333316		0.0696403	0.0244896	-3.84393	-5.35169	0.181553	88780	0.252373	0.0470649	-4.59781	0.597958
488	ACOT7	HGLibA_00488	TTTCTCGCAGTATTCCCGGC	2.8628	4.01886	0.0410392	0.14285		0.0498985	0.0355448	-4.32486	-4.81422	0.0287349	38937	0.0910755	0.0427217	-4.56954	1.0406
489	ACOT7	HGLibA_00489	CCTCGAGGTGCCTCCTGTTG	27.1519	6.64451	0.820784	0.571398		0.0210445	0.0859956	-5.57041	-3.53959	0.254881	99972	0.31464	0.05352	-4.555	0.502187
490	ACOT8	HGLibA_00490	CGGTCGTGACCAAGACGCTA	2.54968	7.28753	0.123118	0.14285		0.0560264	0.0196019	-4.15775	-5.67286	0.180788	88639	0.25171	0.0378142	-4.91531	0.5991
491	ACOT8	HGLibA_00491	ACGAACAGGGTCGAGCTTCT	0.805164	0.375093	0.0410392	0.0476165		0.059139	0.126946	-4.07975	-2.97771	0.126468	76940	0.202853	0.0930424	-3.52873	0.692819
492	ACOT8	HGLibA_00492	CTGTTCGTGTCCGCTCCACT	25.2285	15.2717	0.328314	0.285699		0.0113245	0.0187078	-6.46441	-5.74022	0.0570373	54159	0.12997	0.0150161	-6.10231	0.886157
493	ACOT9	HGLibA_00493	TGACTGTTCAAAACACCGTA	5.994	10.717	0.164157	0.14285		0.0238321	0.0133293	-5.39095	-6.22925	0.0738336	60862	0.149714	0.0185807	-5.8101	0.824738
494	ACOT9	HGLibA_00494	AAATATTTCTCTCGTAATTC	0.715701	0.589432	0.0410392	0.0476165		0.0665313	0.0807837	-3.90982	-3.62979	0.0106314	23745	0.0552551	0.0736575	-3.76981	1.25763
495	ACOT9	HGLibA_00495	CTCCATCCACACTGCATTAG	6.03873	7.3947	0.0410392	0.14285		0.0236556	0.0193178	-5.40168	-5.69392	0.0103692	23449	0.0545724	0.0214867	-5.5478	1.26303
496	ACOX1	HGLibA_00496	CACTCGCAGCCAGCGTTATG	3.04173	7.76979	0.205196	0.285699		0.0939266	0.0367705	-3.41232	-4.76531	0.160779	84696	0.234272	0.0653485	-4.08881	0.63028
497	ACOX1	HGLibA_00497	ATCGTACCTATTCGTGAAAT	3.57851	4.9298	0.0410392	0.14285		0.0399188	0.0289768	-4.64679	-5.10896	0.0254913	36702	0.0857149	0.0344478	-4.87787	1.06694
498	ACOX1	HGLibA_00498	TTCACGAATAGGTACGATAA	10.3329	5.67998	0.123118	0.190466		0.0184329	0.0335329	-5.76157	-4.89828	0.0777504	62292	0.154037	0.0259829	-5.32993	0.812376
499	ACOX2	HGLibA_00499	GCCGAGCTATCAACCGGATG	1.38667	1.28603	0.0410392	0.0952331		0.0686775	0.0740517	-3.86402	-3.75532	0.00202457	10243	0.0243926	0.0713646	-3.80967	1.61274
500	ACOX2	HGLibA_00500	TGATAGCTCGGCGCCTGGGT	4.60733	2.94716	0.0820784	0.0952331		0.0206699	0.0323135	-5.59632	-4.95172	0.0470972	49526	0.117359	0.0264917	-5.27402	0.930484
501	ACOX2	HGLibA_00501	AGGCGCTCACCTTAGCAGCC	1.52086	1.44679	0.0820784	0.0476165		0.0313089	0.0329119	-4.99729	-4.92525	0.00082774	6249	0.016347	0.0321104	-4.96127	1.78656
502	ACOX3	HGLibA_00502	CGAAGATCCGCTTGCATCGA	5.50195	8.14488	0.164157	0.14285		0.0259634	0.0175386	-5.26737	-5.83333	0.0370855	44232	0.103472	0.021751	-5.55035	0.985179
503	ACOX3	HGLibA_00503	CAGCTCGCGATACTTCTCCA	9.66196	5.73357	0.123118	0.238083		0.0246412	0.0415243	-5.34278	-4.5899	0.062042	56243	0.136136	0.0330828	-4.96634	0.866028
504	ACOX3	HGLibA_00504	AGCAAACACCACCGCGTGAG	1.69979	0.482263	0.0820784	0.0476165		0.0280132	0.0987357	-5.15775	-3.34028	0.234029	97240	0.297015	0.0633744	-4.24902	0.527221
505	ACOXL	HGLibA_00505	CTGCCTCTGTTAAAACGTGC	1.96818	4.01886	0.123118	0.190466		0.0967728	0.0473931	-3.36925	-4.39918	0.109686	72397	0.186975	0.072083	-3.88422	0.728215
506	ACOXL	HGLibA_00506	GTCAGCCGAAGCCTTGTCAT	5.90453	11.4136	0.410392	0.0952331		0.0161288	0.00834386	-5.95422	-6.90507	0.0929474	67507	0.169919	0.0122363	-6.42964	0.769758
507	ACOXL	HGLibA_00507	AGAGGACTTCTCCTATGACA	3.22065	3.26867	0.0820784	0.14285		0.0443542	0.0437027	-4.49478	-4.51613	0.000152825	2051	0.00919565	0.0440284	-4.50546	2.03642
508	ACP1	HGLibA_00508	ACGGTACCTGCCGGGCAACG	6.26238	3.26867	0.123118	0.14285		0.0228107	0.0437027	-5.45414	-4.51613	0.0904652	66730	0.167307	0.0332567	-4.98514	0.776486
509	ACP1	HGLibA_00509	TGCTGTTTCTGACTGGAACG	4.38367	1.7683	0.0820784	0.190466		0.043449	0.107712	-4.52453	-3.21475	0.153768	83264	0.227909	0.0755803	-3.86964	0.642238
510	ACP1	HGLibA_00510	CAACTTCCGGGTATGAGATA	3.17592	3.10792	0.0410392	0.0476165		0.014993	0.0153211	-6.05957	-6.02834	0.00012161	1742	0.00861536	0.015157	-6.04396	2.06473
511	ACP2	HGLibA_00511	GTTGAAGCGCTGCATCCCGT	7.11228	8.03771	0.123118	0.190466		0.0267799	0.0236966	-5.22271	-5.39918	0.00388856	14276	0.0336153	0.0252382	-5.31094	1.47346
512	ACP2	HGLibA_00512	GCCCTGCGGCAGCGCTATCA	2.8628	2.19698	0.0820784	0.14285		0.0498985	0.065021	-4.32486	-3.94295	0.0185916	31566	0.0726862	0.0574598	-4.1339	1.13855
513	ACP2	HGLibA_00513	AGCCGTGATAGCGCTGCCGC	2.1471	5.25131	0.0410392	0.190466		0.0887084	0.0362702	-3.49478	-4.78507	0.14753	81901	0.222302	0.0624893	-4.13993	0.653056
514	ACP5	HGLibA_00514	TTTCCGGCTAGCACGTACCA	2.68388	5.19772	0.123118	0.190466		0.0709667	0.0366442	-3.81671	-4.77027	0.0949495	68115	0.17203	0.0538055	-4.29349	0.764396
515	ACP5	HGLibA_00515	GGTAGGCCCGTGCTCGGCTA	1.25248	2.08981	0.0820784	0.0952331		0.0760358	0.0455703	-3.71718	-4.45576	0.0634224	56812	0.13777	0.0608031	-4.08647	0.860844
516	ACP5	HGLibA_00516	CACAGTCCGAGCGATCTCCT	11.0039	4.12603	0.0820784	0.0952331		0.00865448	0.0230811	-6.85234	-5.43715	0.161751	84897	0.235131	0.0158678	-6.14474	0.628691
517	ACP6	HGLibA_00517	GGAGTCCACCCGTTGTTTGC	8.63314	4.66187	0.164157	0.190466		0.0220622	0.0408561	-5.50228	-4.6133	0.0826732	64046	0.159304	0.0314592	-5.05779	0.797773
518	ACP6	HGLibA_00518	ACGAACCTTCTTTCTGACAC	16.7295	6.323	0.0410392	0.14285		0.00853878	0.0225921	-6.87175	-5.46804	0.159097	84352	0.232767	0.0155654	-6.1699	0.633079
519	ACP6	HGLibA_00519	CTTTAGGGGGGCATGTTTGC	6.17292	7.28753	0.123118	0.190466		0.0308551	0.0261359	-5.01835	-5.25782	0.00713694	19391	0.0454219	0.0284955	-5.13808	1.34273
520	ACPL2	HGLibA_00520	GAAACCGTATCACCCAAAAC	0.492044	0.0535848	0.0820784	0.0476165		0.0967728	0.888621	-3.36925	-0.17036	0.44412	116946	0.468672	0.492697	-1.76981	0.329131
521	ACPL2	HGLibA_00521	CGTTTCAGTCCACCTGATCC	27.8229	13.8249	0.53351	0.666632		0.0239598	0.0482197	-5.38324	-4.37423	0.101815	70198	0.178994	0.0360898	-4.87874	0.747161
522	ACPL2	HGLibA_00522	GTTCAAGGGGCTTTCGAAAG	3.17592	1.87547	0.0820784	0.0952331		0.0299859	0.0507783	-5.05957	-4.29964	0.0643947	57228	0.138866	0.0403821	-4.67961	0.857405
523	ACPP	HGLibA_00523	AGACCGAAGTGTACTAGCCA	8.45422	6.05508	0.0820784	0.190466		0.0225291	0.0314556	-5.47206	-4.99054	0.0272963	37961	0.0887402	0.0269924	-5.2313	1.05188
524	ACPP	HGLibA_00524	TACTTTCAGGTGTTTCGGCA	0.760432	7.55545	0.123118	0.238083		0.313089	0.0315114	-1.67536	-4.98798	0.362396	109999	0.406582	0.1723	-3.33167	0.390852
525	ACPP	HGLibA_00525	TCCTCATGGCCACAAGGATT	4.87571	24.8097	0.205196	0.428549		0.0878946	0.0172734	-3.50808	-5.8553	0.282364	103239	0.337535	0.052584	-4.68169	0.471681
526	ACPT	HGLibA_00526	GAACTTCACGGGACTGTCGC	17.2216	6.96602	0.205196	0.333316		0.0193546	0.0478488	-5.69118	-4.38537	0.14756	81907	0.222332	0.0336017	-5.03828	0.652997
527	ACPT	HGLibA_00527	ACAGTCCCGTGAAGTTCTCC	6.5755	4.01886	0.0410392	0.190466		0.028966	0.0473931	-5.10949	-4.39918	0.0559945	53726	0.128622	0.0381796	-4.75434	0.890686
528	ACPT	HGLibA_00528	ACCCCTGGTGTTCGTGGCTC	9.08046	10.9313	0.123118	0.0952331		0.0104877	0.00871197	-6.57516	-6.84279	0.00863258	21217	0.0502123	0.00959983	-6.70897	1.29919
529	ACR	HGLibA_00529	GTGGTGTCCGCATCGTCGGC	1.38667	2.73282	0.0820784	0.0476165		0.0343387	0.0174239	-4.86402	-5.84279	0.097532	68905	0.174683	0.0258813	-5.3534	0.75775
530	ACR	HGLibA_00530	TTGCCTGAACCGTAACCCAC	21.6947	25.1848	0.492471	0.571398		0.0263382	0.0226882	-5.2467	-5.46191	0.00575599	17370	0.0408953	0.0245132	-5.35431	1.38833
531	ACR	HGLibA_00531	GGCGTTATCTTTAGCAACCA	2.50495	1.28603	0.0410392	0.0476165		0.0190089	0.0370259	-5.71718	-4.75532	0.0934496	67656	0.170461	0.0280174	-5.23625	0.768375
532	ACRBP	HGLibA_00532	TGCGAAGAAGCGTTCGTATT	10.3777	6.64451	0.123118	0.190466		0.0183535	0.0286652	-5.7678	-5.12456	0.0464819	49213	0.116562	0.0235093	-5.44618	0.933442
533	ACRBP	HGLibA_00533	CACCATCGGGCACTAAGCCG	2.68388	2.03622	0.0820784	0.14285		0.0532251	0.0701543	-4.23175	-3.83333	0.0203057	32961	0.0760278	0.0616897	-4.03254	1.11903
534	ACRBP	HGLibA_00534	GGGTGCTCACCTTCCGATTG	2.77334	0.160754	0.0820784	0.0952331		0.0343387	0.592414	-4.86402	-0.755322	0.40199	112684	0.440257	0.313376	-2.80967	0.356294
535	ACRC	HGLibA_00535	CACTGCTTGACTGAACATTA	15.4323	10.3419	0.328314	0.238083		0.0154276	0.0230213	-6.01835	-5.44089	0.0384548	44985	0.105496	0.0192244	-5.72962	0.976763
536	ACRC	HGLibA_00536	TCAAGCAGTGATGACACCAG	0.402582	2.89358	0.123118	0.0952331		0.236556	0.0329119	-2.07975	-4.92525	0.342081	108442	0.389301	0.134734	-3.5025	0.409715
537	ACRC	HGLibA_00537	ACTCACCTCGCCTGTCTCTT	12.7484	18.5403	0.328314	0.238083		0.0186755	0.0128413	-5.74271	-6.28306	0.03376	42299	0.0984977	0.0157584	-6.01289	1.00657
538	ACRV1	HGLibA_00538	TAATTTGCATCCTCGTTCCA	7.91744	10.1275	0.246235	0.285699		0.0360848	0.0282102	-4.79247	-5.14764	0.0155597	28779	0.0667236	0.0321475	-4.97005	1.17572
539	ACRV1	HGLibA_00539	CTCACCAGAAGGCTGTTCAC	8.54368	6.59093	0.205196	0.14285		0.0167199	0.0216737	-5.90229	-5.52791	0.0170141	30133	0.069682	0.0191968	-5.7151	1.15688
540	ACRV1	HGLibA_00540	CCTTTGAGTGAGCTTGAGTC	8.8568	9.00224	0.0820784	0.238083		0.0268813	0.0264471	-5.21725	-5.24075	0.000147848	1997	0.00913672	0.0266642	-5.229	2.03921
541	ACSBG1	HGLibA_00541	CTGTCCACAGGTCGTAGATC	0.581507	5.41206	0.0410392	0.190466		0.327539	0.0351929	-1.61026	-4.82857	0.355437	109539	0.40045	0.181366	-3.21942	0.397452
542	ACSBG1	HGLibA_00542	CCGCCCAGATCTACGACCTG	6.97809	4.98338	0.164157	0.0952331		0.0136475	0.0191101	-6.19522	-5.70952	0.0278795	38382	0.089642	0.0163788	-5.95237	1.04749
543	ACSBG1	HGLibA_00543	TGTGTGCTAGTCTACACTTC	35.0694	47.2082	0.738706	0.714248		0.0203667	0.0151298	-5.61764	-6.04647	0.0218207	34089	0.0789967	0.0177482	-5.83205	1.10239
544	ACSBG2	HGLibA_00544	TCCGACAAGCCTCATAGTAC	33.459	31.0792	0.410392	0.619015		0.0185007	0.0199174	-5.75628	-5.64983	0.00141202	8450	0.0206223	0.019209	-5.70305	1.68566
545	ACSBG2	HGLibA_00545	CGAGAGTCAGTCAACCGATT	8.45422	7.93054	0.205196	0.0952331		0.0112646	0.0120084	-6.47206	-6.37981	0.00110493	7367	0.0185097	0.0116365	-6.42594	1.7326
546	ACSBG2	HGLibA_00546	ATGACCTTACCCGGCTAGGA	2.997	2.03622	0.0410392	0.14285		0.0476642	0.0701543	-4.39095	-3.83333	0.0374773	44468	0.10401	0.0589093	-4.11214	0.982925
547	ACSF2	HGLibA_00547	CAAGATCGTGGGCCGCTCTA	1.83398	2.4649	0.0410392	0.0476165		0.0259634	0.0193178	-5.26737	-5.69392	0.021729	34000	0.0788706	0.0226406	-5.48065	1.10308
548	ACSF2	HGLibA_00548	CGAGCCATGGCTGTCTACGT	12.0327	15.8611	0.123118	0.428549		0.0356153	0.0270189	-4.81136	-5.20989	0.0191642	32035	0.0738279	0.0313171	-5.01062	1.13178
549	ACSF2	HGLibA_00549	TGCACCCCTGAACGTAGCTG	13.0168	1.82188	0.246235	0.285699		0.0219485	0.156815	-5.50974	-2.67286	0.329539	107510	0.378278	0.089382	-4.0913	0.422188
550	ACSF3	HGLibA_00550	GCAGCGCGTTGACCACACCA	15.7902	7.87696	0.123118	0.190466		0.0120623	0.0241802	-6.37335	-5.37003	0.0982008	69104	0.175374	0.0181212	-5.87169	0.756034
551	ACSF3	HGLibA_00551	GGACAGAGCCATGCCGATCT	14.0904	22.3448	219.067	2.71414		0.192624	0.121466	-2.37614	-3.04137	0.482158	122928	0.484052	0.157045	-2.70876	0.315108
552	ACSF3	HGLibA_00552	TCTTAAGTTCTGAAACGCCG	0.760432	0.910941	0.0820784	0.0476165		0.0626177	0.0522718	-3.99729	-4.25782	0.00988216	22817	0.0534499	0.0574448	-4.12755	1.27205
553	ACSL1	HGLibA_00553	TCTTCCGACCAACACGCTTA	18.6082	11.8422	0.246235	0.238083		0.0127945	0.0201045	-6.28833	-5.63633	0.047386	49701	0.117663	0.0164495	-5.96233	0.929361
554	ACSL1	HGLibA_00554	ACTTGACAGCGACGAGCCCT	21.6947	16.7184	0.53351	0.428549		0.0197536	0.0256333	-5.66174	-5.28584	0.0172085	30375	0.0699167	0.0226935	-5.47379	1.15542
555	ACSL1	HGLibA_00555	CTCGTCGCTGTCAAGTAGTG	20.3975	12.003	0.205196	0.571398		0.0280132	0.0476047	-5.15775	-4.39275	0.0639041	57004	0.138349	0.0378089	-4.77525	0.859023
556	ACSL3	HGLibA_00556	CAACAGTGATGATGTGCCGC	28.7622	14.0928	0.328314	0.428549		0.0148997	0.0304091	-6.06857	-5.03935	0.103006	70564	0.18015	0.0226544	-5.55396	0.744365
557	ACSL3	HGLibA_00557	CGAGTGGATGATAGCTGCAC	6.26238	9.53809	0.205196	0.14285		0.0228107	0.0149768	-5.45414	-6.06113	0.0421337	46965	0.110716	0.0188937	-5.75764	0.955791
558	ACSL3	HGLibA_00558	CTCACAGAAGATGGCGATGT	3.62324	6.26942	0.0410392	0.238083		0.0657099	0.0379753	-3.92774	-4.7188	0.0684553	58876	0.14349	0.0518426	-4.32327	0.843177
559	ACSL4	HGLibA_00559	AATCGCAGAGTGAATAACTT	3.04173	4.60829	0.0820784	0.190466		0.0626177	0.0413312	-3.99729	-4.59662	0.0424422	47103	0.1112	0.0519745	-4.29696	0.953897
560	ACSL4	HGLibA_00560	TCATGGGCTAAATGAATCTG	4.87571	4.01886	0.123118	0.14285		0.0292982	0.0355448	-5.09304	-4.81422	0.00972289	22635	0.0530113	0.0324215	-4.95363	1.27563
561	ACSL4	HGLibA_00561	GATTACCAGTGTTGAACTTC	5.23356	6.10866	0.123118	0.0476165		0.0090983	0.00779492	-6.78019	-7.00325	0.00612503	18004	0.0419849	0.00844661	-6.89172	1.37691
562	ACSL5	HGLibA_00562	CAGACACAGCGAGTCCTCTT	8.8568	5.51923	0.164157	0.190466		0.0215051	0.0345096	-5.53918	-4.85686	0.0522614	52012	0.124003	0.0280073	-5.19802	0.906569
563	ACSL5	HGLibA_00563	GTCAGGATGCAGATCAACGC	0.715701	0.696602	0.0410392	0.0476165		0.0665313	0.0683555	-3.90982	-3.8708	0.000232813	2855	0.0100636	0.0674434	-3.89031	1.99725
564	ACSL5	HGLibA_00564	TTTAGACAATGGGCCCTGCT	7.64905	2.30414	0.123118	0.14285		0.0186755	0.0619968	-5.74271	-4.01166	0.21161	93875	0.27819	0.0403361	-4.87719	0.555659
565	ACSL6	HGLibA_00565	CGGCGATCTGTGATTGGGTC	7.87271	4.98338	0.164157	0.0952331		0.0120966	0.0191101	-6.36925	-5.70952	0.0488187	50400	0.119539	0.0156034	-6.03939	0.922491
566	ACSL6	HGLibA_00566	ATGTACCAGGTGTTCCGCCG	5.45722	5.89432	0.0820784	0.0476165		0.00872542	0.00807837	-6.84056	-6.95172	0.00152313	8824	0.0213022	0.0084019	-6.89614	1.67157
567	ACSL6	HGLibA_00567	ATCCGCTACATCATCAATAC	13.6431	6.59093	0.205196	0.238083		0.0174508	0.0361228	-5.84056	-4.79095	0.106985	71606	0.184385	0.0267868	-5.31575	0.734274
568	ACSM1	HGLibA_00568	CAATCCATCCTGAGTCCGAC	23.1708	18.5403	0.451431	0.190466		0.00822009	0.0102731	-6.92663	-6.60499	0.0125137	25842	0.0597605	0.00924658	-6.76581	1.22359
569	ACSM1	HGLibA_00569	GTCGGACTCAGGATGGATTG	6.84389	3.8581	0.0820784	0.0476165		0.00695752	0.012342	-7.16721	-6.34028	0.0713388	59934	0.146895	0.00964974	-6.75375	0.832994
570	ACSM1	HGLibA_00570	AACGTCTTCACACAGACCTG	1.02882	0.160754	0.0410392	0.0476165		0.0462827	0.296207	-4.43338	-1.75532	0.33237	107725	0.380767	0.171245	-3.09435	0.419341
571	ACSM2A	HGLibA_00571	GTGCATGCTCCTAATGCCCA	13.6431	19.612	0.287275	0.14285		0.0104705	0.00728378	-6.57753	-7.1011	0.0315296	40852	0.0952487	0.00887714	-6.83931	1.02114
572	ACSM2A	HGLibA_00572	ACAGGCTCCCGAGAGGACGT	8.99099	7.87696	0.0410392	0.0952331		0.0105921	0.0120901	-6.56087	-6.37003	0.0044143	15230	0.0357697	0.0113411	-6.46545	1.44648
573	ACSM2A	HGLibA_00573	GAACATCTTGTGCTCACTTA	9.93035	13.8249	0.410392	0.380932		0.0383604	0.0275541	-4.70424	-5.18159	0.0275791	38168	0.0891732	0.0329573	-4.94291	1.04977
574	ACSM2B	HGLibA_00574	ACAGGCTCCCGAGAGGATGT	4.87571	6.96602	0.123118	0.14285		0.0292982	0.0205066	-5.09304	-5.60777	0.0310974	40595	0.0945379	0.0249024	-5.3504	1.02439
575	ACSM2B	HGLibA_00575	TGTCTGAGAAAAGCTGCGAT	5.77034	5.09055	0.123118	0.0952331		0.0165039	0.0187078	-5.92105	-5.74022	0.00406194	14581	0.0343795	0.0176059	-5.83063	1.4637
576	ACSM2B	HGLibA_00576	AACATCCTCTCGGGAGCCTG	1.92345	1.98264	0.0410392	0.0952331		0.0495117	0.0480336	-4.33609	-4.37981	0.000452873	4391	0.0127282	0.0487726	-4.35795	1.89523
577	ACSM3	HGLibA_00577	GATGCAACAGCGTCTACTGC	4.33894	4.2332	0.123118	0.190466		0.043897	0.0449935	-4.50974	-4.47414	0.000230364	2839	0.0100139	0.0444452	-4.49194	1.9994
578	ACSM3	HGLibA_00578	TGATGCTAGCTCGTGTCACC	21.9631	26.4173	0.410392	0.761865		0.0346884	0.0288396	-4.8494	-5.1158	0.00883926	21517	0.0506977	0.031764	-4.9826	1.29501
579	ACSM3	HGLibA_00579	TTACCCGATCTCCTCTTTGT	9.30411	3.80452	0.164157	0.14285		0.0153534	0.0375474	-6.0253	-4.73514	0.145368	81431	0.220309	0.0264504	-5.38022	0.656967
580	ACSM4	HGLibA_00580	AATGTAGCTTGCATACGAAC	17.3558	10.1811	0.205196	0.0476165		0.00274356	0.00467695	-8.50974	-7.74022	0.0627414	56520	0.136995	0.00371026	-8.12498	0.863294
581	ACSM4	HGLibA_00581	AATACAATGGACTCCACCGC	17.6241	12.646	0.369353	0.476165		0.0270178	0.0376534	-5.20995	-4.73107	0.0274618	38082	0.0889946	0.0323356	-4.97051	1.05064
582	ACSM4	HGLibA_00582	CCCAGGGATCATCTTCATGC	14.9403	8.03771	0.164157	0.238083		0.0159356	0.0296207	-5.9716	-5.07725	0.0821393	63860	0.158736	0.0227782	-5.52442	0.799324
583	ACSM5	HGLibA_00583	TGACCGAATCTGACATCTTC	1.92345	7.60904	0.164157	0.0952331		0.0495117	0.0125158	-4.33609	-6.32011	0.244494	98576	0.306092	0.0310137	-5.3281	0.514149
584	ACSM5	HGLibA_00584	TCTTACATTCAGGATAACTT	3.17592	3.80452	0.0820784	0.0476165		0.014993	0.0125158	-6.05957	-6.32011	0.00833892	20743	0.0496126	0.0137544	-6.18984	1.30441
585	ACSM5	HGLibA_00585	CGTACAGCTCCACACCAGTC	2.1471	2.83999	0.0820784	0.0476165		0.0221771	0.0167664	-5.49478	-5.89828	0.0197946	32572	0.0749991	0.0194718	-5.69653	1.12494
586	ACSS1	HGLibA_00586	ACGAGAGTGTCCCGCGCCAG	2.32603	3.48301	0.0410392	0.0476165		0.0204712	0.0136711	-5.61026	-6.19273	0.0385582	45039	0.105653	0.0170711	-5.90149	0.976118
587	ACSS1	HGLibA_00587	CCAGATCAAAGCAACGCTCT	3.75743	3.05433	0.0820784	0.0952331		0.0253453	0.0311797	-5.30214	-5.00325	0.0110492	24204	0.0563375	0.0282625	-5.15269	1.2492
588	ACSS1	HGLibA_00588	CCGAGAGCGTTGCTTTGATC	3.48904	4.28678	0.0410392	0.0952331		0.0272949	0.0222155	-5.19522	-5.49229	0.0107775	23932	0.0555769	0.0247552	-5.34376	1.25511
589	ACSS2	HGLibA_00589	TCACATCAAAGTTGTACCGA	6.62023	6.10866	0.0410392	0.0952331		0.0143852	0.0155898	-6.11928	-6.00325	0.00166472	9275	0.0221504	0.0149875	-6.06126	1.65462
590	ACSS2	HGLibA_00590	CCACAGTAGACATGTCCCCG	15.5665	10.1811	0.123118	0.14285		0.00917673	0.0140309	-6.7678	-6.15525	0.0418809	46827	0.110376	0.0116038	-6.46153	0.957126
591	ACSS2	HGLibA_00591	GGTGCATTCTGGATGTAGTC	0.67097	1.87547	0.0410392	0.0476165		0.0709667	0.0253892	-3.81671	-5.29964	0.178105	88166	0.249304	0.048178	-4.55818	0.60327
592	ACSS3	HGLibA_00592	CTCCCGGTCGTGACCTTGAT	11.2723	10.9313	0.246235	0.190466		0.0168968	0.0174239	-5.8871	-5.84279	0.000251894	3016	0.0103072	0.0171604	-5.86494	1.98686
593	ACSS3	HGLibA_00593	TAGTCGCATTGATCATGTAA	2.2813	3.64376	0.0820784	0.0476165		0.0208726	0.013068	-5.58225	-6.25782	0.0511031	51455	0.122567	0.0169703	-5.92004	0.911627
594	ACSS3	HGLibA_00594	TACATCGCCTGTGGGATCAT	0.402582	1.23245	0.0410392	0.0476165		0.118278	0.0386357	-3.07975	-4.69392	0.203441	92643	0.271007	0.0784568	-3.88683	0.56702
595	ACTA1	HGLibA_00595	GCCCCCCGACATGACGTTGT	43.0763	24.5954	0.53351	0.571398		0.0132648	0.0232319	-6.23625	-5.42775	0.0691757	59128	0.144382	0.0182484	-5.832	0.840486
596	ACTA1	HGLibA_00596	GGGGCACCACGATGTACCCT	14.6719	17.3079	0.246235	0.380932		0.0259634	0.0220092	-5.26737	-5.50575	0.0070128	19220	0.045029	0.0239863	-5.38656	1.34651
597	ACTA1	HGLibA_00597	CGGTGAGATCGCGGCCCGCC	7.15701	12.003	0.164157	0.14285		0.0199594	0.0119012	-5.64679	-6.39275	0.0601694	55486	0.133828	0.0159303	-6.01977	0.873454
598	ACTA2	HGLibA_00598	CCTACCAGTTGTGCGTCCAG	14.2693	12.2173	0.0820784	0.285699		0.020022	0.0233848	-5.64227	-5.41829	0.00617519	18087	0.0421345	0.0217034	-5.53028	1.37536
599	ACTA2	HGLibA_00599	GGCCTCACCAGTAGTAACGA	3.22065	2.25056	0.0410392	0.14285		0.0443542	0.0634729	-4.49478	-3.97771	0.0323896	41437	0.0964653	0.0539136	-4.23625	1.01563
600	ACTA2	HGLibA_00600	GGGACAAAAAGACAGCTACG	0.939358	0.0535848	0.0410392	0.0476165		0.0506905	0.888621	-4.30214	-0.17036	0.414699	113601	0.45051	0.469656	-2.23625	0.346295
601	ACTB	HGLibA_00601	CAACCGCGAGAAGATGACCC	3.39958	6.59093	0.0410392	0.0952331		0.0280132	0.0144491	-5.15775	-6.11287	0.0908433	66861	0.167677	0.0212312	-5.63531	0.775526
602	ACTB	HGLibA_00602	TCCTTCCCAGGGCGTGATGG	12.2564	6.53734	0.205196	0.14285		0.0116551	0.0218513	-6.42289	-5.51613	0.0841792	64614	0.16078	0.0167532	-5.96951	0.793768
603	ACTB	HGLibA_00603	AGCCATGTACGTTGCTATCC	37.3954	40.9923	0.656627	0.571398		0.0152799	0.0139392	-6.03222	-6.16471	0.00216731	10577	0.0252878	0.0146095	-6.09847	1.59709
604	ACTBL2	HGLibA_00604	TCCTCGACACCAGGGCGTTA	15.4323	18.1652	0.287275	0.380932		0.0246841	0.0209704	-5.34028	-5.5755	0.00682553	18986	0.0443667	0.0228272	-5.45789	1.35294
605	ACTBL2	HGLibA_00605	TGCCAGATCCAGGCGTAGAA	8.32002	5.94791	0.0820784	0.0476165		0.00572312	0.00800559	-7.44898	-6.96478	0.0270202	37771	0.0882843	0.00686436	-7.20688	1.05412
606	ACTBL2	HGLibA_00606	GCCTCATGCCATTCTACGCC	13.4641	16.7184	0.123118	0.380932		0.0282924	0.0227852	-5.14344	-5.45576	0.0118838	25147	0.058321	0.0255388	-5.2996	1.23418
607	ACTC1	HGLibA_00607	TCCCCGGGCAGGCATTGTTC	11.7643	6.43017	0.205196	0.190466		0.0161901	0.0296207	-5.94874	-5.07725	0.0792816	62884	0.155592	0.0229054	-5.513	0.808014
608	ACTC1	HGLibA_00608	TGCATACGATCAGCAATACC	22.0973	24.7026	0.369353	0.238083		0.0107743	0.00963797	-6.53626	-6.69705	0.00317399	12853	0.0304758	0.0102061	-6.61666	1.51605
609	ACTC1	HGLibA_00609	TGGTACGGCCAGAAGCATAC	5.36776	10.6098	0.0410392	0.238083		0.0443542	0.0224399	-4.49478	-5.47779	0.0958723	68401	0.172975	0.0333971	-4.98629	0.762016
610	ACTG1	HGLibA_00610	TCCCCTGCAGGGCGTCATGG	7.96217	16.0218	0.246235	0.190466		0.0239214	0.0118879	-5.38556	-6.39436	0.0999083	69621	0.177099	0.0179046	-5.88996	0.751785
611	ACTG1	HGLibA_00611	TCGACTCACCTTGATCTTCA	10.6013	14.843	0.328314	0.14285		0.0134747	0.00962405	-6.2136	-6.69914	0.0277081	38263	0.0893678	0.0115494	-6.45637	1.04882
612	ACTG1	HGLibA_00612	CAAGCAGGAGTACGACGAGT	1.74452	1.66113	0.0820784	0.0476165		0.0272949	0.0286652	-5.19522	-5.12456	0.000757826	5912	0.0158194	0.02798	-5.15989	1.80081
613	ACTG2	HGLibA_00613	ACCGCGCTCGTGTGTGACAA	17.1321	12.1637	0.410392	0.14285		0.00833813	0.0117439	-6.90606	-6.41195	0.0286831	38904	0.0909883	0.010041	-6.659	1.04101
614	ACTG2	HGLibA_00614	CCACTAGGCATGGAGTCCGC	9.48304	17.2007	0.164157	0.238083		0.0251062	0.0138414	-5.31581	-6.17486	0.0764784	61828	0.152654	0.0194738	-5.74534	0.816293
615	ACTG2	HGLibA_00615	GTGTGACATTGACATCCGTA	10.6461	13.0747	0.0410392	0.428549		0.0402542	0.032777	-4.63472	-4.93117	0.0110037	24157	0.0562144	0.0365156	-4.78294	1.25015
616	ACTL10	HGLibA_00616	CCCGTTACCCACGCTGAAAC	6.5755	7.07319	0.205196	0.190466		0.028966	0.0269279	-5.10949	-5.21475	0.00140845	8439	0.020597	0.027947	-5.16212	1.6862
617	ACTL10	HGLibA_00617	TGCTCCACCGGCGCGTTCAG	3.26539	0.589432	0.0820784	0.0476165		0.0145822	0.0807837	-6.09965	-3.62979	0.298523	104837	0.351413	0.047683	-4.86472	0.454182
618	ACTL10	HGLibA_00618	CATGGCTAGCACCGCGTTGC	45.7601	52.4595	0.943902	0.999947		0.0218519	0.0190613	-5.5161	-5.71321	0.00480751	15900	0.0373144	0.0204566	-5.61465	1.42812
619	ACTL6A	HGLibA_00619	GTTGAAGGACATAGCCATCG	3.04173	5.30489	0.123118	0.190466		0.0626177	0.0359039	-3.99729	-4.79972	0.0710772	59835	0.146598	0.0492608	-4.3985	0.833871
620	ACTL6A	HGLibA_00620	TGCCAAGACCTCGTAACCTG	11.2276	15.0573	0.164157	0.190466		0.0169642	0.0126494	-5.88137	-6.30479	0.0211259	33561	0.0776844	0.0148068	-6.09308	1.10967
621	ACTL6A	HGLibA_00621	TCGTTCTACTGGGCTGATTT	17.1321	16.8256	0.328314	0.380932		0.022235	0.02264	-5.49102	-5.46498	8.7462e-05	1381	0.00781591	0.0224375	-5.478	2.10702
622	ACTL6B	HGLibA_00622	ACTATGAGCGGGGGCGTCTA	1.20775	1.33962	0.0410392	0.0476165		0.039426	0.0355448	-4.66471	-4.81422	0.00287148	12197	0.0290541	0.0374854	-4.73946	1.53679
623	ACTL6B	HGLibA_00623	ATGACCTCCGCTCCATCCCG	19.5923	9.27016	0.205196	0.190466		0.00972147	0.0205461	-6.68461	-5.60499	0.110175	72547	0.18742	0.0151338	-6.1448	0.727184
624	ACTL6B	HGLibA_00624	GTCATGTCGCCCCTCAAGAA	2.05764	1.50037	0.0410392	0.0952331		0.0462827	0.0634729	-4.43338	-3.97771	0.025745	36878	0.0861548	0.0548778	-4.20555	1.06472
625	ACTL7A	HGLibA_00625	TACGATCCGCTACGTGCTGC	51.1279	70.464	0.820784	0.904714		0.0176951	0.0128394	-5.8205	-6.28328	0.0250489	36415	0.0848912	0.0152673	-6.05189	1.07114
626	ACTL7A	HGLibA_00626	GGTCCACCGCTTTGAGTACG	7.38067	8.0913	0.164157	0.285699		0.0387091	0.0353094	-4.69118	-4.8238	0.00229537	10923	0.0259337	0.0370093	-4.75749	1.58614
627	ACTL7A	HGLibA_00627	ACCCACACGGCCCGCTTCGC	1.83398	9.8596	0.205196	0.0952331		0.0519269	0.00965892	-4.26737	-6.69392	0.291584	104196	0.345355	0.0307929	-5.48065	0.461734
628	ACTL7B	HGLibA_00628	CGTAGCCGCACTTGCAGTAC	6.97809	18.2724	0.164157	0.380932		0.0545898	0.0208474	-4.19522	-5.58399	0.16027	84605	0.233781	0.0377186	-4.88961	0.631191
629	ACTL7B	HGLibA_00629	CTTGCGGGTGTCGCCAGCGT	8.63314	7.71621	0.205196	0.190466		0.0220622	0.0246839	-5.50228	-5.34028	0.00328794	13109	0.0309534	0.0233731	-5.42128	1.50929
630	ACTL7B	HGLibA_00630	ACCAGCCGCGCCGACTACGC	5.00991	9.64526	0.328314	0.190466		0.0380179	0.0197471	-4.71718	-5.66221	0.0928673	67479	0.169843	0.0288825	-5.1897	0.769952
631	ACTL8	HGLibA_00631	GAACTCCAGCGTCTTGCCGC	2.72861	2.25056	0.0820784	0.0952331		0.0349017	0.0423153	-4.84056	-4.56268	0.00977358	22701	0.0531328	0.0386085	-4.70162	1.27464
632	ACTL8	HGLibA_00632	GATAACGGTTCTTGCAGCCA	3.13119	2.57207	0.123118	0.0476165		0.0152072	0.0185129	-6.03911	-5.75532	0.0102401	23280	0.0542846	0.01686	-5.89721	1.26532
633	ACTL8	HGLibA_00633	GTGCTACGTGCCGCAGAATC	5.23356	7.23394	0.164157	0.190466		0.0363932	0.0263295	-4.78019	-5.24718	0.0262098	37192	0.0869698	0.0313614	-5.01368	1.06063
634	ACTL9	HGLibA_00634	TAAGCACCACTATTGCTACG	15.8796	12.003	0.205196	0.333316		0.0209902	0.0277694	-5.57414	-5.17036	0.0195337	32359	0.0744977	0.0243798	-5.37225	1.12786
635	ACTL9	HGLibA_00635	CGACTGCGATGCCACGTACA	4.07055	3.75093	0.123118	0.14285		0.0350934	0.0380838	-4.83265	-4.71468	0.00179149	9633	0.0229513	0.0365886	-4.77367	1.63919
636	ACTL9	HGLibA_00636	TGGGGAGCGCAGCGACTCGA	3.80216	0.803771	0.0410392	0.0476165		0.0125235	0.0592414	-6.31921	-4.07725	0.2709	101787	0.328451	0.0358825	-5.19823	0.483529
637	ACTN1	HGLibA_00637	GGCCTTACCTTCGGCTCCGA	14.7166	7.3947	0.246235	0.238083		0.0161778	0.0321964	-5.94984	-4.95696	0.098051	69060	0.175218	0.0241871	-5.4534	0.756421
638	ACTN1	HGLibA_00638	GATCCAAACAGGTGAACGCT	16.8637	11.1456	0.205196	0.285699		0.0169417	0.0256333	-5.88328	-5.28584	0.0405753	46195	0.108398	0.0212875	-5.58456	0.96498
639	ACTN1	HGLibA_00639	CCAGCGGACCGAGAAACTGC	2.23657	3.8581	0.0410392	0.0476165		0.02129	0.012342	-5.55368	-6.34028	0.0657823	57810	0.14043	0.016816	-5.94698	0.85254
640	ACTN2	HGLibA_00640	CACGTAGTTGTACTGCACGC	7.15701	5.6264	0.205196	0.190466		0.0266125	0.0338522	-5.23175	-4.88461	0.0149271	28252	0.0652049	0.0302324	-5.05818	1.18572
641	ACTN2	HGLibA_00641	GTACAACTACGTGTACGACG	2.41549	10.717	0.0820784	0.190466		0.0788519	0.0177724	-3.66471	-5.81422	0.261497	100754	0.320301	0.0483122	-4.73946	0.494441
642	ACTN2	HGLibA_00642	CATCCTTCGCTTTGCTATTC	24.7811	19.3441	0.451431	0.380932		0.0153719	0.0196924	-6.02356	-5.66622	0.0154112	28669	0.0663403	0.0175321	-5.84489	1.17822
643	ACTN4	HGLibA_00643	GCATGAGCTTGAGCCCGTCT	12.3458	14.6822	0.246235	0.190466		0.0154276	0.0129726	-6.01835	-6.26839	0.00763584	20003	0.0471103	0.0142001	-6.14337	1.32688
644	ACTN4	HGLibA_00644	GGAGTTGCACCATGCCGTGA	5.18883	4.60829	0.123118	0.14285		0.0275302	0.0309984	-5.18284	-5.01166	0.00369376	13880	0.0328422	0.0292643	-5.09725	1.48357
645	ACTN4	HGLibA_00645	TGCACATTGACGTTCTTATA	0.0447313	1.01811	0.0410392	0.0476165		1.0645	0.0467695	0.0901775	-4.41829	0.42234	115935	0.449574	0.555635	-2.16405	0.347199
646	ACTR10	HGLibA_00646	GCTCCCCAACAATTTAGAAC	0.0447313	0.0535848	0.0410392	0.0476165		1.0645	0.888621	0.0901775	-0.17036	0.473465	117270	0.498259	0.976561	-0.0400912	0.302545
647	ACTR10	HGLibA_00647	GATCTAACCTGATTGATCCA	9.75143	7.34111	0.164157	0.14285		0.0146491	0.0194589	-6.09304	-5.68343	0.0200044	32745	0.0753935	0.017054	-5.88824	1.12267
648	ACTR10	HGLibA_00648	TTATACTGAACAACTCTGAC	1.92345	0.267924	0.0820784	0.0952331		0.0495117	0.355448	-4.33609	-1.49229	0.347866	109017	0.393796	0.20248	-2.91419	0.404728
649	ACTR1A	HGLibA_00649	ACCCAAGCACGTTCGTGTCA	16.8637	25.9886	0.53351	0.238083		0.0141181	0.00916104	-6.14632	-6.77027	0.0439876	47976	0.113152	0.0116395	-6.45829	0.94634
650	ACTR1A	HGLibA_00650	TGCCATGACACGAACGTGCT	31.2225	13.8249	0.451431	0.619015		0.019826	0.0447755	-5.65647	-4.48115	0.127308	77138	0.203676	0.0323007	-5.06881	0.691059
651	ACTR1A	HGLibA_00651	AAACTTCGGCAGCTCGTTCC	11.3618	11.4671	0.0820784	0.380932		0.0335276	0.0332195	-4.89851	-4.91183	0.000200685	2549	0.00971626	0.0333735	-4.90517	2.0125
652	ACTR1B	HGLibA_00652	TCGGGCGGCCGAAGCACATG	0.178925	0.589432	0.0410392	0.0476165		0.266125	0.0807837	-1.90982	-3.62979	0.239649	97964	0.3019	0.173455	-2.76981	0.520138
653	ACTR1B	HGLibA_00653	CGCTCAACCCGAGTAAGAAC	3.22065	1.60754	0.164157	0.0476165		0.0147847	0.0296207	-6.07975	-5.07725	0.10395	70798	0.181199	0.0222027	-5.5785	0.741844
654	ACTR1B	HGLibA_00654	CTGGCAGTACGTCTACTCCA	2.23657	4.66187	0.0820784	0.14285		0.0638701	0.0306421	-3.96872	-5.02834	0.110652	72657	0.187947	0.0472561	-4.49853	0.725964
655	ACTR2	HGLibA_00655	TATAACTAGATATCTTATCA	1.4314	0.643017	0.0410392	0.0476165		0.0332657	0.0740517	-4.90982	-3.75532	0.128048	77354	0.204288	0.0536587	-4.33257	0.689756
656	ACTR2	HGLibA_00656	TCATTCCAGTTTGTGAAGTG	10.154	9.75243	0.0820784	0.190466		0.0187577	0.0195301	-5.73637	-5.67815	0.00044852	4370	0.0126664	0.0191439	-5.70726	1.89735
657	ACTR2	HGLibA_00657	CACATTTGCCCAGTATATGA	0.223657	0.428678	0.0410392	0.0476165		0.2129	0.111078	-2.23175	-3.17036	0.110841	72720	0.188106	0.161989	-2.70106	0.725598
658	ACTR3	HGLibA_00658	TGTCAGACGTCCTCTCTACA	4.24947	5.51923	0.164157	0.0952331		0.0224106	0.0172548	-5.47968	-5.85686	0.0174163	30567	0.0703166	0.0198327	-5.66827	1.15294
659	ACTR3	HGLibA_00659	AAGTGGGTGATCAAGCTCAA	6.08346	4.98338	0.164157	0.285699		0.0469633	0.0573304	-4.41232	-4.12456	0.0106931	23831	0.0553751	0.0521468	-4.26844	1.25669
660	ACTR3	HGLibA_00660	CACTAGAATATTGTCCTCTC	8.63314	3.96527	0.164157	0.0952331		0.0110311	0.0240168	-6.50228	-5.37981	0.118279	74843	0.195034	0.0175239	-5.94105	0.709889
661	ACTR3B	HGLibA_00661	GGTGCCACAGTCCACCACGC	31.5356	11.9494	0.369353	0.476165		0.0150993	0.0398485	-6.04937	-4.64933	0.161411	84830	0.234821	0.0274739	-5.34935	0.629263
662	ACTR3B	HGLibA_00662	TTTGAATCATTTAACGTACC	13.4641	8.57356	0.0820784	0.14285		0.0106096	0.0166616	-6.55848	-5.90733	0.0467769	49370	0.116929	0.0136356	-6.2329	0.932078
663	ACTR3B	HGLibA_00663	AGGCTCCCTGCCTCCCTGCG	13.4194	10.3954	0.287275	0.14285		0.010645	0.0137416	-6.55368	-6.18531	0.0163501	29551	0.0682815	0.0121933	-6.36949	1.1657
664	ACTR3C	HGLibA_00664	TTCGAATCATTTAACGTTCC	9.79616	5.89432	0.123118	0.285699		0.0291644	0.0484702	-5.09965	-4.36676	0.0595334	55251	0.132976	0.0388173	-4.7332	0.876226
665	ACTR3C	HGLibA_00665	TGAACTGCAATGTAGAGTCC	22.9472	23.8988	0.492471	0.428549		0.0186755	0.0179318	-5.74271	-5.80133	0.000431042	4282	0.012423	0.0183036	-5.77202	1.90577
666	ACTR3C	HGLibA_00666	TCTCCAGGCAGTGCTGGCCT	2.8628	3.91169	0.0820784	0.0476165		0.0166328	0.0121729	-5.90982	-6.36018	0.0240475	35725	0.0830715	0.0144029	-6.135	1.08055
667	ACTR5	HGLibA_00667	TGAGCACAGCTACATCGCTG	19.2792	18.1116	0.164157	0.428549		0.0222286	0.0236615	-5.49144	-5.40131	0.00105664	7127	0.0182968	0.022945	-5.44638	1.73763
668	ACTR5	HGLibA_00668	AACTGCAAGCGCATCAATCT	7.15701	5.25131	0.123118	0.14285		0.0199594	0.0272027	-5.64679	-5.20011	0.0237605	35499	0.0826025	0.023581	-5.42345	1.08301
669	ACTR5	HGLibA_00669	TTACCTGCACATATAGCAGT	10.5119	5.89432	0.205196	0.14285		0.0135894	0.0242351	-6.20138	-5.36676	0.0736775	60795	0.149562	0.0189122	-5.78407	0.825179
670	ACTR6	HGLibA_00670	GGAGCTTACAACGCCAAAAT	3.66797	1.98264	0.0820784	0.0952331		0.0259634	0.0480336	-5.26737	-4.37981	0.0831628	64240	0.159763	0.0369985	-4.82359	0.796522
671	ACTR6	HGLibA_00671	TGAGATGACGACCTTAGTGC	12.6142	66.1772	0.656627	0.571398		0.0452979	0.00863437	-4.46441	-6.85569	0.284578	103465	0.339438	0.0269661	-5.66005	0.469239
672	ACTR6	HGLibA_00672	ACTCTTAACCAATCATCTAA	0.67097	1.33962	0.0410392	0.0476165		0.0709667	0.0355448	-3.81671	-4.81422	0.102732	70490	0.17986	0.0532558	-4.31546	0.745066
673	ACTR8	HGLibA_00673	GCGGCCCATCGTGCCCGCGC	3.57851	14.5215	0.246235	0.0952331		0.0266125	0.00655809	-5.23175	-7.25251	0.24613	98804	0.307429	0.0165853	-6.24213	0.512256
674	ACTR8	HGLibA_00674	CGCACCTCTTGCAGCGACTC	17.5347	8.19847	0.246235	0.285699		0.0162934	0.0348479	-5.93957	-4.84279	0.11421	73692	0.191266	0.0255706	-5.39118	0.718362
675	ACTR8	HGLibA_00675	CATCACCCTGAGTATTTAGT	8.72261	10.2883	0.123118	0.238083		0.0272949	0.0231412	-5.19522	-5.43339	0.00701141	19219	0.0450224	0.025218	-5.31431	1.34657
676	ACTRT1	HGLibA_00676	GAGGGCTCGGTCATAAGTAC	5.72561	2.73282	0.205196	0.0476165		0.00831642	0.0174239	-6.90982	-5.84279	0.111518	73006	0.188513	0.0128702	-6.3763	0.724659
677	ACTRT1	HGLibA_00677	AGTTAAACCCGCTAGCAAAG	0.313119	1.17886	0.0410392	0.0476165		0.152072	0.0403919	-2.71718	-4.62979	0.246485	98858	0.307704	0.0962317	-3.67348	0.511867
678	ACTRT1	HGLibA_00678	CGCAGTCACCAAACTCTGTA	5.81507	3.1615	0.164157	0.190466		0.0327539	0.0602455	-4.93219	-4.053	0.0830944	64205	0.159719	0.0464997	-4.4926	0.796643
679	ACTRT2	HGLibA_00679	GGAGACCATATTCGAGAGCC	0.536776	0.482263	0.0410392	0.0476165		0.0887084	0.0987357	-3.49478	-3.34028	0.0034649	13439	0.0318184	0.093722	-3.41753	1.49732
680	ACTRT2	HGLibA_00680	CTGCACTCCCCTTTCGAGCG	8.45422	2.83999	0.0820784	0.0952331		0.0112646	0.0335329	-6.47206	-4.89828	0.186235	89623	0.256446	0.0223987	-5.68517	0.591004
681	ACTRT2	HGLibA_00681	AGATCACGGCTCCCCCCGAC	4.24947	1.01811	0.123118	0.0476165		0.0112053	0.0467695	-6.47968	-4.41829	0.255539	100080	0.315111	0.0289874	-5.44898	0.501536
682	ACTRT3	HGLibA_00682	GAGCCGTTGTCGATCACCAC	9.66196	11.7886	0.328314	0.238083		0.0246412	0.0201959	-5.34278	-5.62979	0.0102293	23240	0.0543205	0.0224186	-5.48629	1.26504
683	ACTRT3	HGLibA_00683	CAACGGCTCGGGAATGATCA	0.0447313	0.0535848	0.0410392	0.0476165		1.0645	0.888621	0.0901775	-0.17036	0.473465	117271	0.498254	0.976561	-0.0400912	0.302549
684	ACTRT3	HGLibA_00684	ACTAACCGCTTGTCTAAACC	2.19183	1.71471	0.0820784	0.0476165		0.0217245	0.0277694	-5.52453	-5.17036	0.015666	28869	0.0669702	0.024747	-5.34745	1.17412
685	ACVR1	HGLibA_00685	TTGGATCATTCGTGTACATC	12.7484	23.5773	0.451431	0.333316		0.0261456	0.0141372	-5.25729	-6.14436	0.081637	63700	0.158162	0.0201414	-5.70083	0.800898
686	ACVR1	HGLibA_00686	GGCTCGCCAGATTACACTGT	3.75743	4.87621	0.0410392	0.0952331		0.0253453	0.0195301	-5.30214	-5.67815	0.0169355	30063	0.0695214	0.0224377	-5.49015	1.15788
687	ACVR1	HGLibA_00687	AGCAGCCTTTCTGGTAGACG	2.81807	3.1615	0.0820784	0.0952331		0.0337937	0.0301227	-4.8871	-5.053	0.00349008	13506	0.0318906	0.0319582	-4.97005	1.49634
688	ACVR1B	HGLibA_00688	TGCCCACGATCTCCATGTGC	27.5992	31.9901	0.53351	0.619015		0.0224287	0.0193502	-5.47851	-5.69151	0.0056006	17119	0.0403748	0.0208895	-5.58501	1.39389
689	ACVR1B	HGLibA_00689	AGCCTGAGCACCCGTCCATG	8.63314	7.76979	0.287275	0.0952331		0.0110311	0.0122568	-6.50228	-6.35027	0.00303405	12579	0.0297667	0.011644	-6.42627	1.52627
690	ACVR1B	HGLibA_00690	ACACCTGCACATGGAGATCG	3.13119	1.92905	0.0410392	0.0952331		0.0304143	0.0493678	-5.03911	-4.34028	0.0548573	53199	0.127258	0.0398911	-4.6897	0.895315
691	ACVR1C	HGLibA_00691	ATTTATGATGTGACCGCCTC	14.314	7.98413	0.410392	0.190466		0.0133063	0.0238556	-6.23175	-5.38953	0.0756679	61559	0.151696	0.0185809	-5.81064	0.819026
692	ACVR1C	HGLibA_00692	TTGGTTAGGTCTACCTCTGT	27.9123	33.2761	0.615588	0.619015		0.0221771	0.0186024	-5.49478	-5.74837	0.00790922	20314	0.0480499	0.0203897	-5.62158	1.31831
693	ACVR1C	HGLibA_00693	AGGGTCGACAGTGCTCCTAC	19.145	27.9177	0.328314	0.476165		0.0248715	0.0170561	-5.32936	-5.87357	0.0341438	42494	0.0991603	0.0209638	-5.60147	1.00366
694	ACVR2A	HGLibA_00694	TGCCACTTATGTTAATTGCG	31.2225	23.3094	0.574549	0.380932		0.0122006	0.0163425	-6.35691	-5.93523	0.021138	33567	0.0777149	0.0142715	-6.14607	1.1095
695	ACVR2A	HGLibA_00695	ACTTGAGTTGGAACAAGTAC	20.5317	9.10941	0.410392	0.285699		0.013915	0.0313631	-6.16721	-4.99479	0.126791	77039	0.203111	0.0226391	-5.581	0.692267
696	ACVR2A	HGLibA_00696	CCAGTTGCTTAACGAATATG	7.87271	5.6264	0.205196	0.238083		0.0302415	0.0423153	-5.04733	-4.56268	0.0283557	38703	0.0904168	0.0362784	-4.805	1.04375
697	ACVR2B	HGLibA_00697	GCGATGCCGGTACATCCAAA	0.0894626	0.10717	0.0410392	0.0476165		0.532251	0.44431	-0.909822	-1.17036	0.029266	39282	0.0919441	0.488281	-1.04009	1.03648
698	ACVR2B	HGLibA_00698	CGGCATCGCAAGCCCCCCTA	3.66797	2.51848	0.0820784	0.0952331		0.0259634	0.0378137	-5.26737	-4.72495	0.0347026	42794	0.100077	0.0318885	-4.99616	0.999667
699	ACVR2B	HGLibA_00699	CGCGGAACATGACGGCGCCC	15.477	13.6105	0.0820784	0.0952331		0.00615319	0.00699702	-7.34445	-7.15904	0.00414259	14728	0.0347122	0.0065751	-7.25175	1.45952
700	ACVRL1	HGLibA_00700	GCAGTGTTGCATCGCCGACC	4.07055	20.0407	0.123118	0.380932		0.0935825	0.0190079	-3.41762	-5.71725	0.27747	102717	0.333371	0.0562952	-4.56744	0.477072
701	ACVRL1	HGLibA_00701	CTCAGACACGACAACATCCT	15.2981	18.4332	0.246235	0.333316		0.021788	0.0180824	-5.52032	-5.78927	0.00883137	21503	0.0506854	0.0199352	-5.65479	1.29512
702	ACVRL1	HGLibA_00702	CATCGGCAACAACCCGAGAG	2.2813	1.71471	0.0410392	0.0476165		0.0208726	0.0277694	-5.58225	-5.17036	0.0203883	33013	0.0762166	0.024321	-5.3763	1.11795
703	ACY1	HGLibA_00703	TGGCGGAAGAGCGTCACCGA	7.51486	10.8241	0.164157	0.14285		0.0190089	0.0131973	-5.71718	-6.24361	0.0320702	41222	0.0960121	0.0161031	-5.98039	1.01767
704	ACY1	HGLibA_00704	GCTGGACAGTGCGGATACGC	4.20474	3.8581	0.0410392	0.0952331		0.022649	0.0246839	-5.46441	-5.34028	0.00195345	10041	0.0240093	0.0236664	-5.40235	1.61962
705	ACY1	HGLibA_00705	TGAGGAGACAGCCCGCCAGC	2.32603	2.67924	0.123118	0.0476165		0.0204712	0.0177724	-5.61026	-5.81422	0.00553531	17005	0.0401716	0.0191218	-5.71224	1.39608
706	ACY3	HGLibA_00706	GGGGAAGTCCACGACGCCCA	3.35485	3.10792	0.123118	0.190466		0.0567734	0.0612842	-4.13864	-4.02834	0.00172805	9450	0.0225672	0.0590288	-4.08349	1.64652
707	ACY3	HGLibA_00707	CTATAGACCCGTGGGCGTCG	0.939358	2.57207	0.0410392	0.0476165		0.0506905	0.0185129	-4.30214	-5.75532	0.171	86737	0.243302	0.0346017	-5.02873	0.613855
708	ACY3	HGLibA_00708	GGCAACGCCCTTCTCATAGT	0.178925	0.589432	0.0410392	0.0952331		0.532251	0.161567	-0.909822	-2.62979	0.266423	101251	0.324733	0.346909	-1.76981	0.488474
709	ACYP1	HGLibA_00709	CAGGAACTTACCTGCATAAC	40.0793	20.4694	0.287275	0.571398		0.0142567	0.0279148	-6.13221	-5.16283	0.0931203	67557	0.170109	0.0210858	-5.64752	0.769272
710	ACYP1	HGLibA_00710	CACATACCTGAGTATGCTTA	10.1093	8.19847	0.123118	0.238083		0.0235509	0.0290399	-5.40807	-5.10582	0.0111868	24370	0.0566507	0.0262954	-5.25695	1.24679
711	ACYP1	HGLibA_00711	TTTCATAATCCACTGATATC	14.0904	9.16299	0.246235	0.285699		0.0202762	0.0311797	-5.62407	-5.00325	0.0439537	47946	0.113135	0.0257279	-5.31366	0.946403
712	ACYP2	HGLibA_00712	TCCGAACACCTCGTAGTCCA	27.0624	14.843	0.574549	0.428549		0.0158356	0.0288722	-5.98069	-5.11418	0.0788497	62709	0.155176	0.0223539	-5.54743	0.809176
713	ACYP2	HGLibA_00713	CGAGGTGTTCGGAAGAGTGC	5.8598	6.26942	0.205196	0.0476165		0.00812596	0.00759505	-6.94325	-7.04072	0.0013628	8271	0.0203342	0.00786051	-6.99199	1.69177
714	ACYP2	HGLibA_00714	AGAGTATTCAAGCTTAGAGA	0.178925	0.482263	0.0410392	0.0476165		0.266125	0.0987357	-1.90982	-3.34028	0.199789	92015	0.267958	0.18243	-2.62505	0.571933
715	ADA	HGLibA_00715	CAGGCTTGATGGATCCGTCT	8.32002	7.93054	0.0820784	0.238083		0.0286156	0.030021	-5.12705	-5.05789	0.000692926	5658	0.0151139	0.0293183	-5.09247	1.82062
716	ADA	HGLibA_00716	GCTCACTTTGGGCTTGTCGA	48.3993	17.7901	0.369353	0.571398		0.0118059	0.0321188	-6.40434	-4.96044	0.166712	85950	0.239373	0.0219624	-5.68239	0.620925
717	ADA	HGLibA_00717	GAACTGCATGTCCACCTAGA	0.492044	0.750187	0.0410392	0.0476165		0.0967728	0.0634729	-3.36925	-3.97771	0.0466311	49268	0.116806	0.0801229	-3.67348	0.932536
718	ADAD1	HGLibA_00718	GCGAGTTCAGCTTGACCTTA	5.54668	9.80601	0.0820784	0.190466		0.0343387	0.0194234	-4.86402	-5.68606	0.0713851	59958	0.146931	0.0268811	-5.27504	0.832886
719	ADAD1	HGLibA_00719	CTCGCTGCATTTGTGCAAAC	1.11828	1.71471	0.0410392	0.14285		0.12774	0.0833082	-2.96872	-3.5854	0.0484099	50227	0.118946	0.105524	-3.27706	0.924649
720	ADAD1	HGLibA_00720	GCTAGTTCAGATAAAACAAC	1.29721	0.482263	0.0410392	0.0476165		0.0367069	0.0987357	-4.7678	-3.34028	0.173708	87323	0.245496	0.0677213	-4.05404	0.609955
721	ADAD2	HGLibA_00721	ATGGCGAGCGCTCGTCCAAC	1.4314	2.89358	0.0820784	0.14285		0.099797	0.0493678	-3.32486	-4.34028	0.107285	71713	0.184627	0.0745824	-3.83257	0.733704
722	ADAD2	HGLibA_00722	TGCTCACCTACCTACGCTCA	17.5347	20.6837	0.328314	0.380932		0.0217245	0.018417	-5.52453	-5.76282	0.00697654	19175	0.0449013	0.0200708	-5.64367	1.34774
723	ADAD2	HGLibA_00723	CAGTTCCGCGCTCACCGAGA	4.74152	5.03697	0.0820784	0.0476165		0.0100425	0.00945341	-6.63774	-6.72495	0.000949	6736	0.0173867	0.00974794	-6.68135	1.75978
724	ADAL	HGLibA_00724	CAATCACAGTCATCTGATCG	13.2405	8.57356	0.123118	0.14285		0.0107889	0.0166616	-6.53431	-5.90733	0.0438462	47892	0.112986	0.0137253	-6.22082	0.946977
725	ADAL	HGLibA_00725	TCAGATGACTGTGATTGACA	10.1987	13.932	0.328314	0.333316		0.0326821	0.0239244	-4.93536	-5.38537	0.0243825	35950	0.0837014	0.0283032	-5.16037	1.07727
726	ADAL	HGLibA_00726	GAATAGAAGTCTGTCTTGCA	2.1471	1.0717	0.0820784	0.0476165		0.0221771	0.044431	-5.49478	-4.49229	0.102927	70545	0.18006	0.0333041	-4.99354	0.744583
727	ADAM10	HGLibA_00727	AAAATGTGCCACCACGAGTC	1.87872	1.82188	0.0820784	0.0476165		0.0253453	0.0261359	-5.30214	-5.25782	0.000346267	3715	0.0115029	0.0257406	-5.27998	1.93919
728	ADAM10	HGLibA_00728	GATACCTCTCATATTTACAC	0.223657	0.910941	0.0410392	0.0952331		0.4258	0.104544	-1.23175	-3.25782	0.284579	103466	0.339437	0.265172	-2.24479	0.469241
729	ADAM10	HGLibA_00729	AAGTGTCCCTCTTCATTCGT	0.626238	4.2332	0.123118	0.14285		0.228107	0.0337451	-2.13221	-4.88918	0.330835	107601	0.379445	0.130926	-3.5107	0.420851
730	ADAM11	HGLibA_00730	CCTCCTCTCCTCGCAATACG	14.314	18.0581	0.328314	0.428549		0.0299391	0.0237317	-5.06183	-5.39704	0.0137459	27122	0.0625468	0.0268354	-5.22943	1.20379
731	ADAM11	HGLibA_00731	GGTCACGGAACCCAGCCGTC	4.20474	1.12528	0.0410392	0.0952331		0.022649	0.0846306	-5.46441	-3.56268	0.233783	97221	0.29676	0.0536398	-4.51354	0.527594
732	ADAM11	HGLibA_00732	GCTCCACGTATTGCGAGGAG	6.48604	8.0913	0.123118	0.0476165		0.00734139	0.00588491	-7.08973	-7.40876	0.0122155	25514	0.0590862	0.00661315	-7.24925	1.22851
733	ADAM12	HGLibA_00733	TTGGAGTCGAAGCTCTTCAC	20.1738	12.9675	0.328314	0.190466		0.00944125	0.0146879	-6.72681	-6.08922	0.0455082	48736	0.115237	0.0120646	-6.40801	0.938406
734	ADAM12	HGLibA_00734	GTCAGTCTCAGCACGTGTTC	6.35185	6.37659	0.0410392	0.238083		0.0374824	0.037337	-4.73764	-4.74325	0.000254367	3037	0.0103364	0.0374097	-4.74045	1.98563
735	ADAM12	HGLibA_00735	AATATCCCCGTACATGTCCA	2.41549	1.60754	0.164157	0.0476165		0.019713	0.0296207	-5.66471	-5.07725	0.0429414	47401	0.1118	0.0246668	-5.37098	0.951557
736	ADAM15	HGLibA_00736	TAATTGGGAGATCGTCCTGA	2.72861	3.10792	0.0410392	0.0952331		0.0349017	0.0306421	-4.84056	-5.02834	0.00448782	15355	0.0360695	0.0327719	-4.93445	1.44286
737	ADAM15	HGLibA_00737	TTCCCCGAGTATTAGCTGTC	2.95227	3.48301	0.164157	0.0476165		0.0161288	0.0136711	-5.95422	-6.19273	0.00753731	19904	0.0467337	0.0148999	-6.07347	1.33037
738	ADAM15	HGLibA_00738	CACAGCTTGCCCGCCAGCGC	12.1222	3.8581	0.0820784	0.14285		0.0117841	0.0370259	-6.40701	-4.75532	0.196854	91556	0.265345	0.024405	-5.58117	0.576189
739	ADAM17	HGLibA_00739	AACGTTCAGTACTTGATGTC	10.4224	4.71546	0.246235	0.238083		0.0228434	0.0504898	-5.45208	-4.30786	0.124072	76351	0.200545	0.0366666	-4.87997	0.697788
740	ADAM17	HGLibA_00740	GGACTTCTTCACTGGACACG	8.27529	2.57207	0.0820784	0.0952331		0.0115081	0.0370259	-6.4412	-4.75532	0.202269	92461	0.269975	0.024267	-5.59826	0.568676
741	ADAM17	HGLibA_00741	CTTAAGGTGAGCCTGACTCT	23.0366	23.9524	0.492471	0.428549		0.0186029	0.0178917	-5.74833	-5.80457	0.000396841	4078	0.0120095	0.0182473	-5.77645	1.92048
742	ADAM18	HGLibA_00742	CAACCTTACACTCTACATCT	0.67097	2.25056	0.0410392	0.0476165		0.0709667	0.0211576	-3.81671	-5.56268	0.214769	94379	0.280835	0.0460622	-4.6897	0.551549
743	ADAM18	HGLibA_00743	TTTCCGAGATGTAGAGTGTA	5.90453	6.37659	0.0410392	0.0952331		0.0161288	0.0149348	-5.95422	-6.06518	0.00152717	8831	0.0213418	0.0155318	-6.0097	1.67077
744	ADAM18	HGLibA_00744	TCATTTGACTTAATCTTCCG	6.08346	7.82337	0.369353	0.0476165		0.00782721	0.00608644	-6.99729	-7.36018	0.0167729	29932	0.0691555	0.00695683	-7.17873	1.16017
745	ADAM19	HGLibA_00745	ACTCACCTCCAATTTCCGTG	22.3657	15.7003	0.328314	0.285699		0.012774	0.018197	-6.29064	-5.78015	0.0302449	40010	0.0932906	0.0154855	-6.0354	1.03016
746	ADAM19	HGLibA_00746	TGAGGGGCGAGAACTGATCC	13.4194	11.8422	0.205196	0.14285		0.010645	0.0120627	-6.55368	-6.3733	0.00398982	14438	0.0341036	0.0113539	-6.46349	1.4672
747	ADAM19	HGLibA_00747	TCAAACCACCACACGGAAAT	0.0447313	0.10717	0.0410392	0.0476165		1.0645	0.44431	0.0901775	-1.17036	0.419831	113945	0.454709	0.754406	-0.540091	0.342266
748	ADAM2	HGLibA_00748	CAGAAACAAGACGCGCCACA	0.536776	4.5547	0.0410392	0.0476165		0.0887084	0.0104544	-3.49478	-6.57975	0.339188	108228	0.386772	0.0495814	-5.03727	0.412545
749	ADAM2	HGLibA_00749	CGCGTCTTGTTTCTGCTCAG	1.38667	3.00075	0.0410392	0.0952331		0.0686775	0.0317365	-3.86402	-4.97771	0.119084	75037	0.195854	0.050207	-4.42087	0.708067
750	ADAM2	HGLibA_00750	TCCTACAAAATTGTAATTGA	0.0447313	0.375093	0.0410392	0.0476165		1.0645	0.126946	0.0901775	-2.97771	0.421787	115002	0.452628	0.595724	-1.44377	0.344258
751	ADAM20	HGLibA_00751	CCAAATTATGACCAAGCTCG	6.12819	3.00075	0.123118	0.0476165		0.00777008	0.0158682	-7.00785	-5.97771	0.103384	70656	0.180575	0.0118192	-6.49278	0.743341
752	ADAM20	HGLibA_00752	GTAGCTCGCACACACACCAC	1.47613	4.76904	0.0410392	0.0476165		0.0322576	0.0099845	-4.95422	-6.64609	0.202463	92490	0.270149	0.0211211	-5.80016	0.568396
753	ADAM20	HGLibA_00753	ACCCTCCCACACATGATATC	1.5656	10.8241	0.164157	0.0476165		0.0304143	0.00439911	-5.03911	-7.82857	0.318988	106647	0.36913	0.0174067	-6.43384	0.432821
754	ADAM21	HGLibA_00754	TCCATTGAGAGAAATCGTTC	1.47613	3.64376	0.0820784	0.0476165		0.0322576	0.013068	-4.95422	-6.25782	0.14796	82011	0.222651	0.0226628	-5.60602	0.652375
755	ADAM21	HGLibA_00755	ACGACATATTCCTGCAACAT	4.60733	11.4671	0.0820784	0.0952331		0.0206699	0.00830487	-5.59632	-6.91183	0.146392	81639	0.221296	0.0144874	-6.25407	0.655027
756	ADAM21	HGLibA_00756	TAAGAAGCCCGACAGTAAAC	0.760432	0.0535848	0.0410392	0.0476165		0.0626177	0.888621	-3.99729	-0.17036	0.412716	113449	0.448957	0.475619	-2.08382	0.347795
757	ADAM22	HGLibA_00757	TGAACACTTACTGAAGTCCG	3.17592	5.46565	0.0410392	0.0952331		0.0299859	0.0174239	-5.05957	-5.84279	0.0654739	57664	0.140126	0.0237049	-5.45118	0.853483
758	ADAM22	HGLibA_00758	GAGAATGAATGACGTTCCAA	6.17292	5.30489	0.0820784	0.285699		0.0462827	0.0538558	-4.43338	-4.21475	0.00637869	18372	0.0428479	0.0500692	-4.32407	1.36807
759	ADAM22	HGLibA_00759	AGGAGAGCACTGTTACTACC	4.51786	7.98413	0.0820784	0.238083		0.0526981	0.0298195	-4.24611	-5.0676	0.0724259	60334	0.148144	0.0412588	-4.65685	0.829315
760	ADAM23	HGLibA_00760	AACCGTACCTTAGAGTACTG	6.17292	3.75093	0.123118	0.0952331		0.0154276	0.0253892	-6.01835	-5.29964	0.0570086	54150	0.129926	0.0204084	-5.65899	0.886304
761	ADAM23	HGLibA_00761	TATGATAGAGCCACTAGAGC	6.66497	2.41131	0.0410392	0.0952331		0.0142886	0.0394943	-6.12899	-4.66221	0.170358	86628	0.242694	0.0268914	-5.3956	0.614941
762	ADAM23	HGLibA_00762	CACTTACTGAAGTCCATTGC	46.2522	26.846	0.779745	0.904714		0.0195605	0.0337002	-5.67592	-4.8911	0.0665594	58086	0.141414	0.0266303	-5.28351	0.849508
763	ADAM28	HGLibA_00763	TCATCCACTGCATAAAAGAG	6.88862	3.91169	0.164157	0.0952331		0.0138247	0.0243458	-6.17661	-5.36018	0.0713649	59944	0.146924	0.0190852	-5.7684	0.832907
764	ADAM28	HGLibA_00764	AAAAGCTGTACCTGTTGCTC	2.63915	10.5026	0.123118	0.238083		0.090212	0.0226689	-3.47054	-5.46314	0.245636	98729	0.307045	0.0564404	-4.46684	0.512798
765	ADAM28	HGLibA_00765	AATATGTACCTGCAACAGAG	0.894626	3.42942	0.0410392	0.14285		0.159675	0.0416541	-2.64679	-4.5854	0.244265	98540	0.305917	0.100665	-3.61609	0.514397
766	ADAM29	HGLibA_00766	AGTCGGAGAACATTACGCCC	2.77334	4.71546	0.0410392	0.0952331		0.0343387	0.0201959	-4.86402	-5.62979	0.063271	56744	0.137606	0.0272673	-5.24691	0.861361
767	ADAM29	HGLibA_00767	GTGGTGCCAGTTATCCTCAC	11.5407	16.3434	0.492471	0.285699		0.0247558	0.0174811	-5.33609	-5.83806	0.0300416	39873	0.0929818	0.0211185	-5.58708	1.0316
768	ADAM29	HGLibA_00768	AGTAGTATGATCACTCATAT	4.92044	3.96527	0.0820784	0.0476165		0.00967728	0.0120084	-6.69118	-6.37981	0.0117067	24987	0.0578197	0.0108428	-6.5355	1.23792
769	ADAM30	HGLibA_00769	GCATTGTCGGAACTAGTAGA	0.849895	2.73282	0.0410392	0.0476165		0.0560264	0.0174239	-4.15775	-5.84279	0.204649	92826	0.272078	0.0367252	-5.00027	0.565306
770	ADAM30	HGLibA_00770	GGAACCCCTTGCAAGTATGA	1.29721	0.10717	0.0410392	0.0476165		0.0367069	0.44431	-4.7678	-1.17036	0.384099	111520	0.425055	0.240509	-2.96908	0.371555
771	ADAM30	HGLibA_00771	ATGCTCGCCTGTCATCAGAT	14.0904	12.2709	0.205196	0.190466		0.0135175	0.0155218	-6.20903	-6.00956	0.00487449	16042	0.0374994	0.0145196	-6.1093	1.42598
772	ADAM32	HGLibA_00772	GCTCACCGGGTCTTGACGCC	8.8568	6.48376	0.164157	0.0476165		0.00537627	0.00734397	-7.53918	-7.08922	0.0237868	35538	0.0826031	0.00636012	-7.3142	1.083
773	ADAM32	HGLibA_00773	GCCGCACCATGTTCCGCCTC	57.7481	58.6217	0.779745	1.09518		0.0189648	0.0186822	-5.72053	-5.7422	6.58007e-05	1097	0.00740249	0.0188235	-5.73136	2.13062
774	ADAM32	HGLibA_00774	GTGTACAGTTTCTCATCTAT	3.35485	1.55396	0.0410392	0.0476165		0.0141933	0.0306421	-6.13864	-5.02834	0.115834	74113	0.192884	0.0224177	-5.58349	0.714703
775	ADAM33	HGLibA_00775	ACCCTGGCGCACCGTCAGCC	10.4224	6.69809	0.328314	0.238083		0.0228434	0.0355448	-5.45208	-4.81422	0.0470957	49525	0.117357	0.0291941	-5.13315	0.930489
776	ADAM33	HGLibA_00776	GCAGCCAGTCACCCCGCACT	6.26238	6.37659	0.328314	0.190466		0.0304143	0.0298696	-5.03911	-5.06518	0.000218066	2729	0.00986137	0.030142	-5.05214	2.00606
777	ADAM33	HGLibA_00777	GAAACCCACTACGGCCCAGA	0.0447313	0.214339	0.0410392	0.0476165		1.0645	0.222155	0.0901775	-2.17036	0.421112	114440	0.454123	0.643328	-1.04009	0.342826
778	ADAM7	HGLibA_00778	CTGATACAGAAGCGAGATAC	10.8697	6.05508	0.164157	0.190466		0.0175227	0.0314556	-5.83463	-4.99054	0.0750472	61321	0.151036	0.0244891	-5.41259	0.820921
779	ADAM7	HGLibA_00779	GTATCTCGCTTCTGTATCAG	7.60432	11.6815	0.246235	0.190466		0.0250471	0.016305	-5.31921	-5.93854	0.0437486	47837	0.112864	0.020676	-5.62888	0.947446
780	ADAM7	HGLibA_00780	CAAGACATACCTTTAACCTG	13.5983	4.34037	0.246235	0.238083		0.0175082	0.0548531	-5.83582	-4.18828	0.200043	92078	0.268115	0.0361807	-5.01205	0.571679
781	ADAM8	HGLibA_00781	CGGCTACACAGAGACCTATA	1.38667	1.60754	0.0410392	0.0476165		0.0343387	0.0296207	-4.86402	-5.07725	0.00573402	17332	0.0408286	0.0319797	-4.97063	1.38904
782	ADAM8	HGLibA_00782	CTGGGCGCGATGATGCTGCC	5.2783	4.60829	0.123118	0.0952331		0.0180424	0.0206656	-5.79247	-5.59662	0.00477633	15848	0.0371941	0.019354	-5.69455	1.42953
783	ADAM8	HGLibA_00783	CCGACCCATACCTGCCCGCG	4.02582	2.62565	0.0410392	0.190466		0.0473112	0.0725405	-4.40168	-3.78507	0.0448926	48425	0.114409	0.0599258	-4.09337	0.941541
784	ADAM9	HGLibA_00784	CACTGACCATCCCAATATAC	0.0447313	1.60754	0.0820784	0.0476165		1.0645	0.0296207	0.0901775	-5.07725	0.43278	116638	0.457911	0.547061	-2.49354	0.339219
785	ADAM9	HGLibA_00785	TTAGGTATCTTATGTTATTC	28.0018	13.5569	0.328314	0.190466		0.00680192	0.0140493	-7.19984	-6.15335	0.104781	70995	0.182141	0.0104256	-6.6766	0.739592
786	ADAM9	HGLibA_00786	CTTATGAAATTATAACTCCT	1.74452	0.267924	0.0410392	0.0476165		0.0272949	0.177724	-5.19522	-2.49229	0.322447	106905	0.372232	0.10251	-3.84376	0.429186
787	ADAMDEC1	HGLibA_00787	TCGGACCCTACCATGTTCTC	13.9114	9.4845	0.246235	0.238083		0.0171142	0.0251023	-5.86867	-5.31604	0.0353648	43237	0.100941	0.0211082	-5.59235	0.995931
788	ADAMDEC1	HGLibA_00788	TACCACGAAACCTGAGAACA	3.31012	4.12603	0.0410392	0.190466		0.0575406	0.0461621	-4.11928	-4.43715	0.0129974	26322	0.0609383	0.0518514	-4.27821	1.21511
789	ADAMDEC1	HGLibA_00789	ACCACAACTTCATGCTGCGT	2.23657	6.21583	0.0410392	0.0476165		0.02129	0.00766053	-5.55368	-7.02834	0.170325	86618	0.242674	0.0144753	-6.29101	0.614976
790	ADAMTS1	HGLibA_00790	CTGCCGGTTGGCATCGTACG	2.10237	7.60904	0.164157	0.0476165		0.022649	0.00625789	-5.46441	-7.32011	0.226718	96185	0.290892	0.0144534	-6.39226	0.536268
791	ADAMTS1	HGLibA_00791	GCACCTCGTACGATGCCAAC	14.7166	28.0784	0.205196	0.571398		0.0388268	0.0203501	-4.6868	-5.61882	0.08804	65893	0.16489	0.0295884	-5.15281	0.782805
792	ADAMTS1	HGLibA_00792	GCTTGTGGCAGACCAGTCGA	4.4284	5.14414	0.164157	0.0476165		0.0107525	0.00925647	-6.53918	-6.75532	0.00594785	17733	0.0413934	0.0100045	-6.64725	1.38307
793	ADAMTS10	HGLibA_00793	CTCACGTGTGCCCGATCTCG	3.13119	6.91243	0.0410392	0.0952331		0.0304143	0.0137771	-5.03911	-6.18159	0.120023	75330	0.19663	0.0220957	-5.61035	0.706351
794	ADAMTS10	HGLibA_00794	CCAGACGCACACCATCGACA	6.39658	2.03622	0.123118	0.0952331		0.0148881	0.0467695	-6.06969	-4.41829	0.20027	92114	0.268314	0.0308288	-5.24399	0.571357
795	ADAMTS10	HGLibA_00795	CGCTCACACATTCCGCCCAC	14.2246	4.28678	0.287275	0.14285		0.0100425	0.0333233	-6.63774	-4.90733	0.210488	93721	0.277169	0.0216829	-5.77253	0.557255
796	ADAMTS12	HGLibA_00796	ACCACCCGCACATCGTTTAC	2.32603	4.01886	0.0820784	0.14285		0.0614135	0.0355448	-4.0253	-4.81422	0.0687984	58979	0.143958	0.0484792	-4.41976	0.841765
797	ADAMTS12	HGLibA_00797	CTCGGACTGGACCCACCACG	6.26238	4.87621	0.0820784	0.14285		0.0228107	0.0292952	-5.45414	-5.09319	0.0157815	29000	0.0671592	0.026053	-5.27367	1.17289
798	ADAMTS12	HGLibA_00798	GTACTACAGAATTTCTCACG	1.4314	2.08981	0.0410392	0.0476165		0.0332657	0.0227852	-4.90982	-5.45576	0.0348816	42913	0.100314	0.0280254	-5.18279	0.998639
799	ADAMTS13	HGLibA_00799	TGCAGGCGGCATCCTACACC	20.7553	9.75243	0.328314	0.285699		0.0137651	0.0292952	-6.18284	-5.09319	0.112975	73358	0.19006	0.0215301	-5.63802	0.721109
800	ADAMTS13	HGLibA_00800	CATAGCGCTCTGTGTCCTCC	30.9988	39.7599	0.410392	0.666632		0.0215051	0.0167664	-5.53918	-5.89828	0.0154558	28710	0.0664371	0.0191358	-5.71873	1.17759
801	ADAMTS13	HGLibA_00801	AAGTAAGAAGACACGGCCTG	6.97809	6.69809	0.164157	0.14285		0.0204712	0.0213269	-5.61026	-5.55118	0.000440857	4334	0.0125534	0.020899	-5.58072	1.90124
802	ADAMTS14	HGLibA_00802	ACACTTGTCATCCGCCTTCA	12.2564	11.8422	0.164157	0.190466		0.0155402	0.0160836	-6.00785	-5.95826	0.00030532	3420	0.0110175	0.0158119	-5.98306	1.95792
803	ADAMTS14	HGLibA_00803	AAGCCGGACCTTCACCGCCA	1.61033	0.589432	0.0410392	0.0476165		0.0295695	0.0807837	-5.07975	-3.62979	0.174575	87505	0.246209	0.0551766	-4.35477	0.608697
804	ADAMTS14	HGLibA_00804	GGCGGTGAAGGTCCGGCTTG	2.10237	1.0717	0.0410392	0.0476165		0.022649	0.044431	-5.46441	-4.49229	0.0958223	68381	0.172936	0.03354	-4.97835	0.762115
805	ADAMTS15	HGLibA_00805	CGCGGAGCCTTTGGCTACCG	3.7127	1.28603	0.0410392	0.0952331		0.0256506	0.0740517	-5.28486	-3.75532	0.18306	89020	0.253781	0.0498512	-4.52009	0.59554
806	ADAMTS15	HGLibA_00806	TTAACGGCCGCCGCTACTAC	6.48604	8.89507	0.123118	0.0952331		0.0146828	0.0107063	-6.08973	-6.5454	0.0243281	35919	0.0835869	0.0126945	-6.31757	1.07786
807	ADAMTS15	HGLibA_00807	AGGGGTTGGCACGGTCGATC	0.715701	2.08981	0.0410392	0.14285		0.199594	0.0683555	-2.32486	-3.8708	0.19742	91649	0.265838	0.133975	-3.09783	0.575383
808	ADAMTS16	HGLibA_00808	TGGATGAAGCCCCGCGCGCG	0.0894626	0.428678	0.0410392	0.0476165		0.532251	0.111078	-0.909822	-3.17036	0.333051	107765	0.381406	0.321664	-2.04009	0.418613
809	ADAMTS16	HGLibA_00809	GGGACACGTAATCGCCCCTG	21.4263	16.0754	0.287275	0.0476165		0.00222234	0.00296207	-8.8137	-8.39918	0.0201433	32831	0.0757181	0.00259221	-8.60644	1.1208
810	ADAMTS16	HGLibA_00810	TGTGCAGACTTTACCGCCAG	3.89162	6.16225	0.0820784	0.0476165		0.0122356	0.00772714	-6.35277	-7.01585	0.0485766	50306	0.119168	0.00998139	-6.68431	0.923839
811	ADAMTS17	HGLibA_00811	CCGGCTCACCAGCGAGCACA	9.75143	6.75168	0.0820784	0.190466		0.0195321	0.0282102	-5.67801	-5.14764	0.032543	41520	0.0967283	0.0238712	-5.41282	1.01445
812	ADAMTS17	HGLibA_00812	CCCGTGGTACTGCACCATGT	26.8835	22.3984	0.656627	0.476165		0.0177122	0.0212589	-5.81912	-5.55579	0.00857928	21154	0.0500509	0.0194855	-5.68745	1.30059
813	ADAMTS17	HGLibA_00813	GTGGACGAGAACATCTGATC	0.0894626	0.321509	0.0410392	0.0476165		0.532251	0.148103	-0.909822	-2.75532	0.299421	104904	0.352244	0.340177	-1.83257	0.453156
814	ADAMTS18	HGLibA_00814	GTGACTGCTCAAAATCGCCG	0.849895	2.14339	0.0820784	0.0952331		0.112053	0.044431	-3.15775	-4.49229	0.161419	84831	0.23483	0.0782419	-3.82502	0.629246
815	ADAMTS18	HGLibA_00815	GTCGTGTGAAATATATGACC	6.7097	4.28678	0.205196	0.0952331		0.0141933	0.0222155	-6.13864	-5.49229	0.047765	49892	0.11815	0.0182044	-5.81546	0.927567
816	ADAMTS18	HGLibA_00816	GGGCGACCCAGAAGATCAGC	0.134194	0.160754	0.0410392	0.0476165		0.354834	0.296207	-1.49478	-1.75532	0.0171423	30270	0.0698891	0.32552	-1.62505	1.15559
817	ADAMTS19	HGLibA_00817	GCCAGGACTGCATGACCGTG	14.8955	7.87696	0.287275	0.0952331		0.0063934	0.0120901	-7.2892	-6.37003	0.085861	65191	0.162541	0.00924174	-6.82962	0.789038
818	ADAMTS19	HGLibA_00818	TCATTGCACTTTCGAATCTG	18.5635	16.1826	0.205196	0.285699		0.0153904	0.0176547	-6.02183	-5.8238	0.00480163	15888	0.0372969	0.0165225	-5.92281	1.42833
819	ADAMTS19	HGLibA_00819	CACTGATTAGAGCCCGAGAG	10.3329	3.80452	0.0820784	0.14285		0.0138247	0.0375474	-6.17661	-4.73514	0.166789	85975	0.239414	0.025686	-5.45588	0.62085
820	ADAMTS2	HGLibA_00820	CGAGAAGGGCACCACCCGCG	0.760432	2.14339	0.123118	0.0952331		0.125235	0.044431	-2.99729	-4.49229	0.191712	90659	0.26097	0.0848332	-3.74479	0.583409
821	ADAMTS2	HGLibA_00821	GGAGTTCTTCATCGAACCCT	1.4314	1.17886	0.0410392	0.14285		0.099797	0.121176	-3.32486	-3.04483	0.0123603	25667	0.0594301	0.110486	-3.18484	1.22599
822	ADAMTS2	HGLibA_00822	AGGAGCACGCCAACAGCTCG	19.5476	10.1811	0.246235	0.380932		0.0194874	0.0374156	-5.68131	-4.74022	0.0898647	66555	0.166633	0.0284515	-5.21076	0.778238
823	ADAMTS20	HGLibA_00823	GACCGCCGATGCATCCTTTC	29.6121	18.4867	0.53351	0.238083		0.00804004	0.0128786	-6.95858	-6.27888	0.0510972	51453	0.122558	0.0104593	-6.61873	0.91166
824	ADAMTS20	HGLibA_00824	ACGAAGTAGTGATCCCCGAG	2.01291	0.375093	0.0410392	0.0476165		0.0236556	0.126946	-5.40168	-2.97771	0.295486	104528	0.348866	0.0753007	-4.1897	0.457342
825	ADAMTS20	HGLibA_00825	ATTAGTTATGATTCACCGTG	29.8358	11.7351	0.287275	0.14285		0.00478786	0.0121729	-7.7064	-6.36018	0.150947	82640	0.225418	0.00848038	-7.03329	0.647011
826	ADAMTS3	HGLibA_00826	TCTCTTATTAGAGTCGGACC	13.5536	5.51923	0.0410392	0.238083		0.017566	0.0431369	-5.83107	-4.53493	0.14431	81199	0.219331	0.0303515	-5.183	0.6589
827	ADAMTS3	HGLibA_00827	AATGAGACGCCGCAGACACG	0.0447313	0.643017	0.0410392	0.0476165		1.0645	0.0740517	0.0901775	-3.75532	0.422154	115553	0.450862	0.569276	-1.83257	0.345956
828	ADAMTS3	HGLibA_00828	ACCTCTGTAGTGGAAGTCTT	5.68088	4.34037	0.0820784	0.0952331		0.0167638	0.0219413	-5.89851	-5.51021	0.0180453	31096	0.0716167	0.0193525	-5.70436	1.14499
829	ADAMTS4	HGLibA_00829	CATACCCAGCGTGTCGCAAG	7.38067	6.75168	0.164157	0.238083		0.0322576	0.0352627	-4.95422	-4.82571	0.00212085	10472	0.024994	0.0337602	-4.88996	1.60216
830	ADAMTS4	HGLibA_00830	AGTCTCCACTTGCGACACGC	17.5347	16.7184	0.287275	0.14285		0.00814669	0.00854443	-6.93957	-6.8708	0.000600066	5191	0.014266	0.00834556	-6.90518	1.8457
831	ADAMTS4	HGLibA_00831	AGCCATTCTGTTTACCCGTC	2.8628	3.59018	0.0820784	0.190466		0.0665313	0.053052	-3.90982	-4.23645	0.0138647	27242	0.0628094	0.0597917	-4.07314	1.20198
832	ADAMTS5	HGLibA_00832	GGACGCGGGGGTTTCGCAGC	0.67097	1.01811	0.0410392	0.0476165		0.0709667	0.0467695	-3.81671	-4.41829	0.043983	47961	0.113175	0.0588681	-4.1175	0.946249
833	ADAMTS5	HGLibA_00833	CCGGCCATACAACCGCGCCA	4.07055	3.80452	0.246235	0.190466		0.0467913	0.0500632	-4.41762	-4.32011	0.00133267	8161	0.0201526	0.0484272	-4.36886	1.69567
834	ADAMTS5	HGLibA_00834	GGGCTTAGATGCATCAATGC	5.23356	5.94791	0.164157	0.190466		0.0363932	0.0320224	-4.78019	-4.96478	0.00433083	15062	0.0354848	0.0342078	-4.87248	1.44996
835	ADAMTS6	HGLibA_00835	TCAACGTAGTACAACTAAAG	0.536776	0.267924	0.0410392	0.0476165		0.0887084	0.177724	-3.49478	-2.49229	0.116848	74442	0.193713	0.133216	-2.99354	0.712842
836	ADAMTS6	HGLibA_00836	ACCAGCTAACTATTCCAATA	0.0447313	0.0535848	0.0410392	0.0476165		1.0645	0.888621	0.0901775	-0.17036	0.473465	117272	0.49825	0.976561	-0.0400912	0.302553
837	ADAMTS6	HGLibA_00837	CATACAGATGTCGTTGTTGA	7.64905	4.60829	0.205196	0.14285		0.0186755	0.0309984	-5.74271	-5.01166	0.0594616	55219	0.132893	0.0248369	-5.37719	0.876498
838	ADAMTS7	HGLibA_00838	CCCCCCGCGTCGACTCGAAC	3.93636	4.71546	0.0410392	0.0476165		0.0120966	0.010098	-6.36925	-6.62979	0.00817712	20548	0.0491117	0.0110973	-6.49952	1.30882
839	ADAMTS7	HGLibA_00839	CCGGCTTTGTGAGCGAGACG	2.50495	1.7683	0.123118	0.0952331		0.0380179	0.0538558	-4.71718	-4.21475	0.0314983	40837	0.095189	0.0459369	-4.46597	1.02141
840	ADAMTS7	HGLibA_00840	ACACCCACCTGGTGCGGGTC	0.268388	1.50037	0.0410392	0.0476165		0.177417	0.0317365	-2.49478	-4.97771	0.305861	105499	0.357791	0.104577	-3.73625	0.44637
841	ADAMTS8	HGLibA_00841	ATGGCCGTGTCGTAGTGCTC	2.90754	8.94865	0.123118	0.285699		0.0982616	0.0319265	-3.34723	-4.9691	0.198691	91848	0.26697	0.0650941	-4.15816	0.573537
842	ADAMTS8	HGLibA_00842	CAGTGTAAGCCCCCCATTGT	3.26539	7.93054	0.0820784	0.0476165		0.0145822	0.0060042	-6.09965	-7.37981	0.141071	80415	0.216499	0.0102932	-6.73973	0.664545
843	ADAMTS8	HGLibA_00843	CGAACAGCGGTGCCATCACG	4.4284	5.67998	0.0820784	0.238083		0.0537627	0.0419161	-4.21725	-4.57635	0.0162014	29410	0.0679848	0.0478394	-4.3968	1.16759
844	ADAMTS9	HGLibA_00844	CGCTGCGCCTATAAATGATG	5.8598	3.26867	0.0820784	0.14285		0.0243779	0.0437027	-5.35828	-4.51613	0.0752947	61441	0.151238	0.0340403	-4.93721	0.82034
845	ADAMTS9	HGLibA_00845	GACGTAGCAGCATTAAACAG	1.34194	4.12603	0.0820784	0.0476165		0.0354834	0.0115405	-4.81671	-6.43715	0.195242	91268	0.264003	0.023512	-5.62693	0.578392
846	ADAMTS9	HGLibA_00846	ATGCTGCTACGTCACCAGCC	21.8736	26.0958	0.287275	0.380932		0.0174152	0.0145975	-5.84351	-6.09814	0.00787743	20266	0.0479701	0.0160063	-5.97083	1.31903
847	ADAMTSL1	HGLibA_00847	AGGCATCCCATAGGCCGTCC	14.985	16.129	0.246235	0.238083		0.0158881	0.0147611	-5.97591	-6.08205	0.00139219	8388	0.020483	0.0153246	-6.02898	1.68861
848	ADAMTSL1	HGLibA_00848	CTCCTCGGAGCGTGCGGTCC	5.94926	14.6822	0.164157	0.190466		0.0320151	0.0129726	-4.9651	-6.26839	0.145949	81540	0.220894	0.0224938	-5.61675	0.655816
849	ADAMTSL1	HGLibA_00849	CAAGCATGGAATGCTGCCGT	23.7523	7.82337	0.123118	0.238083		0.0100236	0.0304322	-6.64046	-5.03826	0.18912	90161	0.258865	0.0202279	-5.83936	0.586927
850	ADAMTSL2	HGLibA_00850	GACCGGAATCGAGTACATCG	5.63615	5.14414	0.123118	0.14285		0.0253453	0.0277694	-5.30214	-5.17036	0.00218603	10634	0.0253696	0.0265573	-5.23625	1.59569
851	ADAMTSL2	HGLibA_00851	TGCGATAGTTGCCCGTCACG	18.9213	21.166	0.328314	0.428549		0.022649	0.0202471	-5.46441	-5.62614	0.00324772	13006	0.0308169	0.021448	-5.54528	1.51121
852	ADAMTSL2	HGLibA_00852	GACCAACGAGGTGTGCGAGC	0.894626	3.32226	0.0820784	0.0476165		0.0532251	0.0143326	-4.23175	-6.12456	0.234322	97283	0.297256	0.0337788	-5.17815	0.526869
853	ADAMTSL3	HGLibA_00853	GGTCATCATAGCGATAAGTG	1.65506	2.25056	0.0410392	0.0476165		0.0287703	0.0211576	-5.11928	-5.56268	0.0234892	35271	0.0821871	0.024964	-5.34098	1.0852
854	ADAMTSL3	HGLibA_00854	CACTTATCGCTATGATGACC	10.6013	4.76904	0.123118	0.14285		0.0134747	0.0299535	-6.2136	-5.06113	0.122333	75905	0.198897	0.0217141	-5.63737	0.701371
855	ADAMTSL3	HGLibA_00855	ACTGGGATGCTTGGGGCGAC	7.47013	3.32226	0.164157	0.0952331		0.0127485	0.0286652	-6.29353	-5.12456	0.126376	76920	0.202758	0.0207069	-5.70904	0.693021
856	ADAMTSL4	HGLibA_00856	TTCGATATAACCGTCCTCCC	30.8199	23.6309	0.656627	0.666632		0.0216299	0.0282102	-5.53083	-5.14764	0.0178224	30874	0.0712406	0.0249201	-5.33923	1.14727
857	ADAMTSL4	HGLibA_00857	AGGACGGTTATATCGAAAGA	0.0447313	0.267924	0.0410392	0.0476165		1.0645	0.177724	0.0901775	-2.49229	0.421428	114666	0.453568	0.621113	-1.20106	0.343358
858	ADAMTSL4	HGLibA_00858	TCCTGGCCGCTCGAATCTCC	13.6431	11.5207	0.123118	0.238083		0.0174508	0.0206656	-5.84056	-5.59662	0.0072636	19539	0.0458779	0.0190582	-5.71859	1.3384
859	ADAMTSL5	HGLibA_00859	GCGGCCGAAGCTGTGGTAGA	1.11828	2.73282	0.0820784	0.0476165		0.04258	0.0174239	-4.55368	-5.84279	0.147701	81936	0.222465	0.030002	-5.19823	0.652738
860	ADAMTSL5	HGLibA_00860	GGACAGGGCGGCCATTGTAC	1.5656	2.25056	0.0820784	0.0476165		0.0304143	0.0211576	-5.03911	-5.56268	0.0329118	41774	0.0972299	0.025786	-5.30089	1.0122
861	ADAMTSL5	HGLibA_00861	GCACACTGTAGGTCTCGGAA	8.09637	3.00075	0.0410392	0.0952331		0.0117624	0.0317365	-6.40967	-4.97771	0.16443	85470	0.237422	0.0217495	-5.69369	0.624479
862	ADAP1	HGLibA_00862	CCGGGCCAAGTACGAGCGAC	2.19183	3.10792	0.0410392	0.0476165		0.0217245	0.0153211	-5.52453	-6.02834	0.0295426	39506	0.0922868	0.0185228	-5.77644	1.03486
863	ADAP1	HGLibA_00863	GAACTCCTGTCGCTCGTACT	6.26238	8.30564	0.123118	0.285699		0.0456215	0.0343982	-4.45414	-4.86152	0.0203194	32968	0.0760629	0.0400099	-4.65783	1.11883
864	ADAP1	HGLibA_00864	CAAGGTGAAGTCCGTCCGCC	9.30411	6.37659	0.246235	0.190466		0.0204712	0.0298696	-5.61026	-5.06518	0.0349706	42973	0.10043	0.0251704	-5.33772	0.998138
865	ADAP2	HGLibA_00865	GCTGCTTAAGGTAACCGAGA	0.0447313	0.267924	0.0410392	0.0476165		1.0645	0.177724	0.0901775	-2.49229	0.421428	114667	0.453564	0.621113	-1.20106	0.343361
866	ADAP2	HGLibA_00866	GGGGAAACCATCTCGCTCCC	1.25248	0.857356	0.0410392	0.0952331		0.0760358	0.111078	-3.71718	-3.17036	0.0384943	45015	0.105534	0.0935567	-3.44377	0.976607
867	ADAP2	HGLibA_00867	AACTTTACCTGGGAGCGAGA	0.0447313	1.3932	0.0410392	0.0952331		2.129	0.0683555	1.09018	-3.8708	0.436555	116764	0.461406	1.09868	-1.39031	0.335916
868	ADAR	HGLibA_00868	AATAGTATCCGCGCAGCACC	13.6431	12.8068	0.410392	0.14285		0.0104705	0.0111542	-6.57753	-6.48626	0.00114763	7496	0.0188941	0.0108124	-6.53189	1.72367
869	ADAR	HGLibA_00869	CTCGGCCATTGATGACAACC	18.1609	15.8611	0.328314	0.428549		0.0235973	0.0270189	-5.40523	-5.20989	0.00475477	15811	0.0371128	0.0253081	-5.30756	1.43048
870	ADAR	HGLibA_00870	TGGTCTCTTACCGAGGTTCA	3.39958	4.2332	0.0410392	0.0952331		0.0280132	0.0224967	-5.15775	-5.47414	0.0121912	25496	0.0590105	0.025255	-5.31595	1.22907
871	ADARB1	HGLibA_00871	AGCTGACGCTGTCTCACGCC	2.72861	7.28753	0.0820784	0.238083		0.0872542	0.0326699	-3.51863	-4.93589	0.167438	86102	0.23999	0.059962	-4.22726	0.619806
872	ADARB1	HGLibA_00872	TCACGCTCGCAGAAAAGTGC	7.24647	9.64526	0.0820784	0.190466		0.026284	0.0197471	-5.24967	-5.66221	0.0202443	32907	0.0759221	0.0230156	-5.45594	1.11963
873	ADARB1	HGLibA_00873	CGTCTCATACCTTCCAGGAT	12.3458	13.5034	0.205196	0.238083		0.0192844	0.0176314	-5.69642	-5.82571	0.00207102	10365	0.0246586	0.0184579	-5.76107	1.60803
874	ADARB2	HGLibA_00874	GCGGTCCTTACCTTTCCGCT	3.84689	0.321509	0.0410392	0.0476165		0.0123779	0.148103	-6.33609	-2.75532	0.366709	110305	0.41028	0.0802407	-4.5457	0.38692
875	ADARB2	HGLibA_00875	CGTGGACGGCAGGACGTTCG	54.8853	28.0784	0.656627	0.666632		0.0121459	0.0237418	-6.36339	-5.39643	0.0930173	67527	0.169997	0.0179438	-5.87991	0.76956
876	ADARB2	HGLibA_00876	GGTGAACGGGCTCACGTTCG	11.8091	11.4136	0.205196	0.238083		0.020161	0.0208596	-5.63229	-5.58314	0.000303414	3403	0.0110034	0.0205103	-5.60772	1.95847
877	ADAT1	HGLibA_00877	TCTTGAACTCCGAAGCCTTT	4.20474	3.21509	0.0410392	0.14285		0.0339734	0.044431	-4.87945	-4.49229	0.0183843	31358	0.0723522	0.0392022	-4.68587	1.14055
878	ADAT1	HGLibA_00878	ATTTGAACAGAGCCGCAGTG	3.53377	2.67924	0.0410392	0.14285		0.0404241	0.0533173	-4.62864	-4.22925	0.0197717	32550	0.0749628	0.0468707	-4.42895	1.12515
879	ADAT1	HGLibA_00879	CCTCAGCATGGCTATCATTG	0.849895	1.3932	0.0820784	0.0476165		0.0560264	0.0341777	-4.15775	-4.8708	0.060405	55585	0.134112	0.0451021	-4.51427	0.872531
880	ADAT2	HGLibA_00880	GAGCACGCGCCGCTTGCAGC	2.95227	1.33962	0.0820784	0.0952331		0.0322576	0.0710897	-4.95422	-3.81422	0.125377	76664	0.201827	0.0516736	-4.38422	0.695021
881	ADAT2	HGLibA_00881	CACTTTGACGACACCAATCG	12.7037	16.1826	0.246235	0.238083		0.0187412	0.0147123	-5.73764	-6.08684	0.014674	28021	0.0646277	0.0167267	-5.91224	1.18958
882	ADAT2	HGLibA_00882	CGCGTGCTCGGTGTCGGCAG	8.09637	10.1275	0.123118	0.380932		0.0470498	0.0376136	-4.40967	-4.7326	0.0130892	26405	0.0611761	0.0423317	-4.57114	1.21342
883	ADAT3	HGLibA_00883	CGCACACCATGACGGCGTGC	50.9042	18.0581	0.410392	0.619015		0.0121604	0.0342791	-6.36167	-4.86653	0.174534	87502	0.24616	0.0232198	-5.6141	0.608783
884	ADAT3	HGLibA_00884	GCGCACCGTAGAAGACGCGC	15.477	3.05433	0.328314	0.285699		0.0184596	0.093539	-5.75949	-3.41829	0.285976	103619	0.340599	0.0559993	-4.58889	0.467757
885	ADAT3	HGLibA_00885	GCGTAAACTGGACGCAGACG	4.74152	3.96527	0.0410392	0.14285		0.0301274	0.0360252	-5.05278	-4.79485	0.00833255	20735	0.0495938	0.0330763	-4.92382	1.30457
886	ADC	HGLibA_00886	GTACACGATGGTCTTGGAGG	9.52777	6.26942	0.205196	0.238083		0.0249883	0.0379753	-5.3226	-4.7188	0.0422093	46993	0.110848	0.0314818	-5.0207	0.955272
887	ADC	HGLibA_00887	CGAGGTAGCTGCCTTCTTCG	13.9114	20.0407	0.369353	0.380932		0.0273827	0.0190079	-5.19059	-5.71725	0.0324308	41467	0.096518	0.0231953	-5.45392	1.01539
888	ADC	HGLibA_00888	GTTGGCGCAGATGATCTTAC	15.0745	8.68073	0.328314	0.0476165		0.00315876	0.00548531	-8.30643	-7.51021	0.0674422	58437	0.142429	0.00432204	-7.90832	0.846403
889	ADCK1	HGLibA_00889	CTAATGACTTTGGCGCTGTC	9.21465	11.7886	0.287275	0.190466		0.0206699	0.0161567	-5.59632	-5.95172	0.015386	28652	0.0662712	0.0184133	-5.77402	1.17868
890	ADCK1	HGLibA_00890	CTTAGAGATTCGCAACAACG	1.52086	3.64376	0.0820784	0.0476165		0.0313089	0.013068	-4.99729	-6.25782	0.141131	80433	0.216541	0.0221884	-5.62755	0.664459
891	ADCK1	HGLibA_00891	AAGACCAACGACCTGCTGCG	8.05164	17.3615	0.164157	0.238083		0.0295695	0.0137133	-5.07975	-6.18828	0.115124	73939	0.192152	0.0216414	-5.63401	0.716354
892	ADCK2	HGLibA_00892	GATTCTGAGCTTCGTAACGC	6.84389	9.05582	0.287275	0.190466		0.0278301	0.0210324	-5.16721	-5.57124	0.0199947	32744	0.0753594	0.0244313	-5.36922	1.12286
893	ADCK2	HGLibA_00893	TTCCCTCTGCCCGCTGCGAC	5.68088	10.5026	0.123118	0.476165		0.083819	0.0453378	-3.57658	-4.46314	0.0842559	64636	0.160872	0.0645784	-4.01986	0.79352
894	ADCK2	HGLibA_00894	ACTTGACGGCTTTCACATTC	26.2573	19.9871	91.8458	1.80943		0.0689115	0.0905297	-3.85911	-3.46546	0.6518	123292	0.652429	0.0797206	-3.66229	0.185466
895	ADCK3	HGLibA_00895	GCGTGGTGCGGCACTCAAGC	4.83098	5.57281	0.123118	0.0952331		0.019713	0.0170889	-5.66471	-5.8708	0.00527013	16635	0.0390978	0.0184009	-5.76775	1.40785
896	ADCK3	HGLibA_00896	ATTGGCCGGCTGGCCAACTT	0.536776	0.267924	0.0410392	0.0476165		0.0887084	0.177724	-3.49478	-2.49229	0.116848	74443	0.19371	0.133216	-2.99354	0.712848
897	ADCK3	HGLibA_00897	GATCGTGCGCACGCTCTGCA	3.44431	11.4136	0.0410392	0.190466		0.0552988	0.0166877	-4.17661	-5.90507	0.20793	93336	0.274929	0.0359932	-5.04084	0.560779
898	ADCK4	HGLibA_00898	GCTAGGAGTACTGGCCGAGA	2.72861	3.75093	0.0410392	0.0476165		0.0174508	0.0126946	-5.84056	-6.29964	0.0246479	36138	0.0841724	0.0150727	-6.0701	1.07483
899	ADCK4	HGLibA_00899	TGACCGCTCTCGAGAACGCA	5.00991	8.35922	0.123118	0.14285		0.0285134	0.0170889	-5.13221	-5.8708	0.0595615	55265	0.133005	0.0228011	-5.50151	0.876131
900	ADCK4	HGLibA_00900	GCCCATCCTGGTAAAACTTT	2.50495	2.41131	0.0410392	0.0476165		0.0190089	0.0197471	-5.71718	-5.66221	0.000377872	3922	0.0118903	0.019378	-5.6897	1.92481
901	ADCK5	HGLibA_00901	GGTGCTCTCCACCGCGGTAG	3.44431	3.91169	0.0410392	0.14285		0.0414741	0.0365187	-4.59165	-4.77522	0.00441863	15241	0.035779	0.0389964	-4.68343	1.44637
902	ADCK5	HGLibA_00902	TGCACCAATGTTGTCCTTCG	9.66196	17.0935	0.369353	0.285699		0.0295695	0.0167139	-5.07975	-5.90281	0.0723876	60319	0.148103	0.0231417	-5.49128	0.829436
903	ADCK5	HGLibA_00903	GGACTCGTTACCTTGGAGGA	4.78625	7.55545	0.123118	0.14285		0.0298458	0.0189068	-5.06633	-5.72495	0.0487745	50376	0.119488	0.0243763	-5.39564	0.922677
904	ADCY1	HGLibA_00904	GTTCACACCGACGAAGAGCA	8.1411	8.25205	0.164157	0.190466		0.0233956	0.0230811	-5.41762	-5.43715	5.05448e-05	892	0.00699303	0.0232383	-5.42738	2.15533
905	ADCY1	HGLibA_00905	TGTCGCCGCATCAAGATTCT	3.39958	6.64451	0.164157	0.190466		0.0560264	0.0286652	-4.15775	-5.12456	0.0962415	68500	0.173391	0.0423458	-4.64115	0.760974
906	ADCY1	HGLibA_00906	GGACTGCTACTACTGCGTGT	8.27529	5.73357	0.164157	0.285699		0.0345244	0.0498292	-4.85624	-4.32686	0.0334625	42142	0.0979934	0.0421768	-4.59155	1.0088
907	ADCY10	HGLibA_00907	ACCTTAACTGCTCTCTGATC	2.59442	7.07319	0.0820784	0.0952331		0.0367069	0.013464	-4.7678	-6.21475	0.168237	86244	0.240739	0.0250854	-5.49128	0.618453
908	ADCY10	HGLibA_00908	CCTGACCAATCACCAGAAAG	2.41549	5.30489	0.0820784	0.190466		0.0788519	0.0359039	-3.66471	-4.79972	0.123426	76200	0.199897	0.0573779	-4.23221	0.699194
909	ADCY10	HGLibA_00909	CCCCCATACCTGCAAATTTC	4.56259	2.14339	0.0410392	0.0952331		0.0208726	0.044431	-5.58225	-4.49229	0.113108	73395	0.190187	0.0326518	-5.03727	0.720818
910	ADCY2	HGLibA_00910	CCGCGACTTGATGCAATTAC	15.5665	15.8075	0.164157	0.333316		0.0214124	0.0210859	-5.54541	-5.56758	9.09277e-05	1426	0.0078692	0.0212491	-5.55649	2.10407
911	ADCY2	HGLibA_00911	GCTTATGGTAGGCTCCCGCC	1.78925	4.07244	0.0410392	0.0952331		0.0532251	0.0233848	-4.23175	-5.41829	0.129028	77602	0.205194	0.0383049	-4.82502	0.687835
912	ADCY2	HGLibA_00912	TCCATATCACCAACGAGAAG	2.50495	2.14339	0.0820784	0.14285		0.0570268	0.0666466	-4.13221	-3.90733	0.00679993	18945	0.0442959	0.0618367	-4.01977	1.35364
913	ADCY3	HGLibA_00913	CACGCGCGAAGTTCAGGCCC	22.813	16.1826	0.574549	0.380932		0.0166981	0.0235396	-5.90418	-5.40876	0.0290862	39173	0.0916334	0.0201188	-5.65647	1.03795
914	ADCY3	HGLibA_00914	CTTCTCCGAGCCCGAATACT	18.0715	7.71621	0.328314	0.285699		0.0158094	0.0370259	-5.98307	-4.75532	0.135624	79060	0.211707	0.0264176	-5.3692	0.674265
915	ADCY3	HGLibA_00915	TTACGAGATGGCCTCCACCA	6.5755	3.8581	0.0820784	0.0952331		0.014483	0.0246839	-6.10949	-5.34028	0.0635784	56877	0.137952	0.0195835	-5.72489	0.860273
916	ADCY4	HGLibA_00916	CAGCGCGACCCATACCAAGC	2.46022	0.10717	0.0820784	0.0952331		0.0387091	0.888621	-4.69118	-0.17036	0.416646	113763	0.451981	0.463665	-2.43077	0.344879
917	ADCY4	HGLibA_00917	TGGGTCGCGCTGCTAGCGCT	0.0447313	0.0535848	0.0410392	0.0476165		1.0645	0.888621	0.0901775	-0.17036	0.473465	117273	0.498246	0.976561	-0.0400912	0.302556
918	ADCY4	HGLibA_00918	CTCGTAGAAGAGGTCTTCGC	3.17592	2.03622	0.0410392	0.0476165		0.014993	0.0233848	-6.05957	-5.41829	0.04609	49048	0.115968	0.0191889	-5.73893	0.935661
919	ADCY5	HGLibA_00919	GCGGTTCATCTTGGCGATCA	4.4284	2.03622	0.123118	0.190466		0.0430101	0.093539	-4.53918	-3.41829	0.123864	76293	0.200361	0.0682746	-3.97873	0.698187
920	ADCY5	HGLibA_00920	CTGCACCCACTATCCGGCTG	3.35485	3.64376	0.0410392	0.0952331		0.0283867	0.0261359	-5.13864	-5.25782	0.00182987	9750	0.0231617	0.0272613	-5.19823	1.63523
921	ADCY5	HGLibA_00921	GGTGCAGACACCCACGATGT	8.99099	3.8581	0.123118	0.14285		0.0158881	0.0370259	-5.97591	-4.75532	0.133801	78667	0.209904	0.026457	-5.36562	0.677978
922	ADCY6	HGLibA_00922	ACGCGTTGCGCTCGCCACCA	6.7097	17.9509	0.328314	0.523782		0.0780634	0.0291786	-3.67921	-5.09895	0.168394	86281	0.24086	0.053621	-4.38908	0.618235
923	ADCY6	HGLibA_00923	GCAGTGTTGCCCGAGTGATG	8.58841	7.93054	0.287275	0.14285		0.0166328	0.0180126	-5.90982	-5.79485	0.00174796	9503	0.0226999	0.0173227	-5.85234	1.64398
924	ADCY6	HGLibA_00924	CCGCAGCCAGCTTGTCAAAC	0.223657	3.00075	0.0820784	0.0952331		0.4258	0.0317365	-1.23175	-4.97771	0.387011	111666	0.427716	0.228768	-3.10473	0.368844
925	ADCY7	HGLibA_00925	ACTTCTCGTAGAGCGCATCT	2.46022	2.51848	0.0410392	0.0952331		0.0387091	0.0378137	-4.69118	-4.72495	0.000269894	3159	0.0105438	0.0382614	-4.70807	1.977
926	ADCY7	HGLibA_00926	CTACTTCCTCAACGAGGGCG	6.03873	11.4136	0.205196	0.285699		0.0473112	0.0250316	-4.40168	-5.32011	0.0874631	65735	0.164203	0.0361714	-4.86089	0.784618
927	ADCY7	HGLibA_00927	TGTTACCTGCTCCCACGCAC	10.8697	11.8958	0.205196	0.285699		0.026284	0.0240168	-5.24967	-5.37981	0.00212834	10485	0.0250511	0.0251504	-5.31474	1.60117
928	ADCY8	HGLibA_00928	CGTAGCCTATGCCGTCGCCC	13.6878	9.8596	0.246235	0.238083		0.0173938	0.0241473	-5.84528	-5.37199	0.0264633	37412	0.0872945	0.0207706	-5.60864	1.05901
929	ADCY8	HGLibA_00929	CCACTTCCGATTTGCGCCTT	14.7613	11.7351	0.164157	0.285699		0.0193546	0.0243458	-5.69118	-5.36018	0.013253	26563	0.0615732	0.0218502	-5.52568	1.21061
930	ADCY8	HGLibA_00930	ATGGGCCAGTCGATCAAATC	2.10237	6.75168	0.123118	0.0476165		0.022649	0.00705255	-5.46441	-7.14764	0.202807	92548	0.270439	0.0148508	-6.30603	0.567931
931	ADCY9	HGLibA_00931	CTTACCTGATGGACACCGCG	15.656	25.6135	0.451431	0.380932		0.0243315	0.0148723	-5.36103	-6.07123	0.0556292	53567	0.128162	0.0196019	-5.71613	0.892241
932	ADCY9	HGLibA_00932	TGTCCCTCGCGGTGTCCATC	51.0384	92.3265	1.10806	1.33326		0.0261227	0.0144407	-5.25855	-6.11371	0.0761635	61706	0.152326	0.0202817	-5.68613	0.817226
933	ADCY9	HGLibA_00933	CGGCCCCCACGACGGTGGCG	13.2852	5.51923	0.123118	0.0476165		0.00358418	0.00862739	-8.12414	-6.85686	0.138516	79743	0.214368	0.00610578	-7.4905	0.668839
934	ADCYAP1	HGLibA_00934	GGCTCCGAGCCATCGAAGTC	0.984089	3.26867	0.0410392	0.0952331		0.0967728	0.0291351	-3.36925	-5.1011	0.213442	94172	0.279712	0.062954	-4.23518	0.553289
935	ADCYAP1	HGLibA_00935	CCGTGAAGATCCCGTCCGAG	0.492044	2.35773	0.0820784	0.0476165		0.0967728	0.0201959	-3.36925	-5.62979	0.282268	103227	0.33746	0.0584844	-4.49952	0.471778
936	ADCYAP1	HGLibA_00936	AACCCGCTGCCAGACTTCGA	2.05764	1.92905	0.0820784	0.0952331		0.0462827	0.0493678	-4.43338	-4.34028	0.0011494	7509	0.0188905	0.0478252	-4.38683	1.72376
937	ADCYAP1R1	HGLibA_00937	GTCTGGGAGACCGAAACCAT	3.84689	3.59018	0.0410392	0.0952331		0.0247558	0.026526	-5.33609	-5.23645	0.001289	8007	0.0198673	0.0256409	-5.28627	1.70186
938	ADCYAP1R1	HGLibA_00938	GTGTTGGAAGCCCGCCCATG	0.0447313	0.375093	0.0410392	0.0476165		1.0645	0.126946	0.0901775	-2.97771	0.421787	115003	0.452624	0.595724	-1.44377	0.344262
939	ADCYAP1R1	HGLibA_00939	CCCCTTACCTGAGAGATCTA	8.72261	5.57281	0.123118	0.14285		0.0163769	0.0256333	-5.93219	-5.28584	0.0468908	49425	0.117083	0.0210051	-5.60901	0.931505
940	ADD1	HGLibA_00940	GACCAGAGTGAACTCCGAGC	1.47613	0.857356	0.0820784	0.0476165		0.0322576	0.0555388	-4.95422	-4.17036	0.0707868	59726	0.146266	0.0438982	-4.56229	0.834858
941	ADD1	HGLibA_00941	CATGGCACCAGACCTTCGCC	15.4323	12.9675	0.205196	0.238083		0.0154276	0.0183599	-6.01835	-5.7673	0.00768497	20039	0.0473282	0.0168937	-5.89282	1.32488
942	ADD1	HGLibA_00942	GAATGGTGATTCTCGTGCTG	2.32603	2.14339	0.0820784	0.0476165		0.0204712	0.0222155	-5.61026	-5.49229	0.00182919	9747	0.0231602	0.0213433	-5.55128	1.63526
943	ADD2	HGLibA_00943	TGAAGTCCGCGATCTGTCGC	15.9243	14.4679	0.328314	0.190466		0.0119607	0.0131648	-6.38556	-6.24718	0.00238969	11136	0.026483	0.0125627	-6.31637	1.57703
944	ADD2	HGLibA_00944	AGTACATGCGCCTTCGCAAC	12.48	17.2007	0.287275	0.285699		0.0228925	0.0166097	-5.44898	-5.91183	0.0253078	36575	0.0853935	0.0197511	-5.6804	1.06858
945	ADD2	HGLibA_00945	CCGCATGAGCCGCTCCCCTT	5.72561	6.80526	0.0410392	0.190466		0.0332657	0.0279881	-4.90982	-5.15904	0.00776187	20147	0.0475455	0.0306269	-5.03443	1.32289
946	ADD3	HGLibA_00946	ACAAGTCTACAAGTCTGTAC	10.8697	5.73357	0.0820784	0.14285		0.013142	0.0249146	-6.24967	-5.32686	0.0858747	65200	0.162544	0.0190283	-5.78827	0.789028
947	ADD3	HGLibA_00947	ACAGGCCTTTCGGGAAGACT	9.52777	5.84074	0.164157	0.0952331		0.00999532	0.016305	-6.64453	-5.93854	0.0547258	53144	0.127084	0.0131501	-6.29154	0.895908
948	ADD3	HGLibA_00948	ACACCTATCAATGACCTTCC	13.9562	5.41206	0.246235	0.190466		0.0136475	0.0351929	-6.19522	-4.82857	0.157068	83949	0.230901	0.0244202	-5.5119	0.636575
949	ADH1A	HGLibA_00949	TCACCTTAATACGAACTTCA	1.20775	0.160754	0.0820784	0.0476165		0.039426	0.296207	-4.66471	-1.75532	0.358519	109722	0.403248	0.167816	-3.21002	0.394428
950	ADH1A	HGLibA_00950	CCATGGTACCACTAACCACG	0.715701	10.2347	0.0820784	0.0476165		0.0665313	0.00465247	-3.90982	-7.74779	0.373502	110838	0.41587	0.0355919	-5.82881	0.381042
951	ADH1A	HGLibA_00951	CTGTGGCACAGATGACCACG	16.6848	21.2731	0.164157	0.476165		0.0285389	0.0223834	-5.13093	-5.48143	0.0148503	28165	0.0650696	0.0254612	-5.30618	1.18662
952	ADH1B	HGLibA_00952	CCAGGTTGCCACTAACCACG	13.8667	23.363	0.369353	0.333316		0.0240371	0.0142668	-5.37859	-6.13119	0.0614279	56000	0.135373	0.019152	-5.75489	0.868468
953	ADH1B	HGLibA_00953	TCTCATCCACCACCGTGTAC	25.4521	51.2806	0.574549	0.714248		0.0280624	0.0139282	-5.15522	-6.16584	0.0999456	69630	0.177142	0.0209953	-5.66053	0.751679
954	ADH1B	HGLibA_00954	GTCTGCAGTTAACGTTGCCA	20.6659	20.523	0.369353	0.571398		0.0276494	0.0278419	-5.17661	-5.1666	3.78051e-05	703	0.00663665	0.0277456	-5.1716	2.17805
955	ADH4	HGLibA_00955	AGACTTACATAAACCGATCC	9.84089	10.8241	1.35429	86.2335		8.76278	7.96679	3.13139	2.994	0.513074	123077	0.514466	8.36479	3.06269	0.288643
956	ADH4	HGLibA_00956	CTAGCTTTCCCAGTGATCGT	19.2792	16.6113	0.287275	0.190466		0.00987936	0.0114661	-6.66137	-6.44648	0.00563528	17184	0.0404711	0.0106727	-6.55393	1.39285
957	ADH4	HGLibA_00957	GGAGTGACCAACGTCAAACC	9.79616	6.59093	0.164157	0.0476165		0.00486074	0.00722456	-7.68461	-7.11287	0.037141	44257	0.103568	0.00604265	-7.39874	0.984774
958	ADH5	HGLibA_00958	CTGATAGATCATTGCCACTG	9.7067	9.00224	0.123118	0.380932		0.0392443	0.0423153	-4.67137	-4.56268	0.00169362	9363	0.0223232	0.0407798	-4.61703	1.65124
959	ADH5	HGLibA_00959	GTGCTCATTGAGATGACCGA	2.68388	6.00149	0.164157	0.190466		0.0709667	0.0317365	-3.81671	-4.97771	0.128689	77498	0.20493	0.0513516	-4.39721	0.688395
960	ADH5	HGLibA_00960	ACTTCAGGTTATCAAGTGCA	9.75143	15.0037	0.164157	0.333316		0.0341812	0.0222155	-4.87065	-5.49229	0.0438653	47900	0.113016	0.0281984	-5.18147	0.946861
961	ADH6	HGLibA_00961	TCCATACAGGTTGTGGCCAC	10.9144	23.7916	0.410392	0.333316		0.030539	0.0140098	-5.0332	-6.15742	0.118707	74962	0.195429	0.0222744	-5.59531	0.709011
962	ADH6	HGLibA_00962	GCTGGAATCGTTGAGAGTAT	3.98109	7.66262	0.123118	0.190466		0.0478427	0.0248565	-4.38556	-5.33023	0.0913722	67009	0.168281	0.0363496	-4.85789	0.773965
963	ADH6	HGLibA_00963	GATGCAAAGCAGCCATACTC	1.47613	1.66113	0.123118	0.0952331		0.0645152	0.0573304	-3.95422	-4.12456	0.00408287	14612	0.0344833	0.0609228	-4.03939	1.46239
964	ADH7	HGLibA_00964	CCTACTCGCTCCTAATGCAA	4.29421	2.25056	0.0410392	0.0952331		0.0221771	0.0423153	-5.49478	-4.56268	0.0884699	66027	0.165359	0.0322462	-5.02873	0.781572
965	ADH7	HGLibA_00965	AATGCTTGTCGCAACCCAGA	4.16001	2.35773	0.205196	0.0952331		0.0228925	0.0403919	-5.44898	-4.62979	0.0749809	61294	0.150969	0.0316422	-5.03939	0.821113
966	ADH7	HGLibA_00966	GACTAAAGAAGTTCGCATTA	0.849895	0.535848	0.0410392	0.0476165		0.0560264	0.0888621	-4.15775	-3.49229	0.0539449	52800	0.126087	0.0724442	-3.82502	0.89933
967	ADHFE1	HGLibA_00967	AGGATCAATCAGTCCCAGTG	3.57851	2.57207	0.0410392	0.0476165		0.0133063	0.0185129	-6.23175	-5.75532	0.026476	37433	0.0872874	0.0159096	-5.99354	1.05905
968	ADHFE1	HGLibA_00968	CGACCACTCGGGCAGGCATG	20.6659	11.7886	0.123118	0.238083		0.0115206	0.0201959	-6.43964	-5.62979	0.0687285	58955	0.14387	0.0158583	-6.03472	0.84203
969	ADHFE1	HGLibA_00969	TTACAATGTGGATCACCCAC	3.89162	1.92905	0.0820784	0.14285		0.0367069	0.0740517	-4.7678	-3.75532	0.104229	70893	0.181443	0.0553793	-4.26156	0.74126
970	ADI1	HGLibA_00970	GAAATTTCACGTACTGCCCG	3.66797	7.3947	0.164157	0.190466		0.0519269	0.0257571	-4.26737	-5.27888	0.102792	70512	0.179908	0.038842	-4.77313	0.744951
971	ADI1	HGLibA_00971	GCAGTGGGTACTTCGATGTG	4.11528	5.30489	0.0410392	0.0476165		0.0115707	0.00897597	-6.43338	-6.79972	0.0158666	29084	0.0673263	0.0102733	-6.61655	1.17182
972	ADI1	HGLibA_00972	GGGGATCTATCACCGCTTCA	3.31012	1.33962	0.0410392	0.0952331		0.0287703	0.0710897	-5.11928	-3.81422	0.149205	82257	0.223853	0.04993	-4.46675	0.650037
973	ADIG	HGLibA_00973	GAAGTACCCTTTGATGCCGC	7.91744	5.94791	0.0820784	0.14285		0.0180424	0.0240168	-5.79247	-5.37981	0.0202369	32901	0.0759082	0.0210296	-5.58614	1.11971
974	ADIG	HGLibA_00974	CTACGCTTCTTACTTAGCCA	5.36776	2.62565	0.0820784	0.0476165		0.00887084	0.0181351	-6.81671	-5.78507	0.10314	70593	0.180309	0.013503	-6.30089	0.743982
975	ADIG	HGLibA_00975	AAATGACTCCAGTGTGTGCT	12.0327	7.87696	0.205196	0.14285		0.0118718	0.0181351	-6.39632	-5.78507	0.0422992	47031	0.110995	0.0150034	-6.0907	0.954698
976	ADIPOQ	HGLibA_00976	CCAGGGCATCCGGGCCATAA	0.67097	0.321509	0.0410392	0.0476165		0.0709667	0.148103	-3.81671	-2.75532	0.122638	75978	0.199201	0.109535	-3.28602	0.700709
977	ADIPOQ	HGLibA_00977	ATCGGTGAAACCGGAGTACC	5.23356	2.57207	0.123118	0.0952331		0.0181966	0.0370259	-5.78019	-4.75532	0.104183	70865	0.181435	0.0276112	-5.26775	0.741279
978	ADIPOQ	HGLibA_00978	TAGGCAAAGTAGTACAGCCC	4.65206	7.07319	0.0410392	0.190466		0.0409424	0.0269279	-4.61026	-5.21475	0.0417706	46785	0.110184	0.0339351	-4.91251	0.957882
979	ADIPOR1	HGLibA_00979	GTCCCACTGCGCCACAATGA	12.1669	10.717	0.123118	0.190466		0.0156544	0.0177724	-5.99729	-5.81422	0.00411049	14679	0.0345582	0.0167134	-5.90575	1.46145
980	ADIPOR1	HGLibA_00980	CTGCCATCATTGTGGCGCAG	10.5566	17.3615	0.164157	0.285699		0.0270636	0.0164559	-5.2075	-5.92525	0.0562618	53825	0.128998	0.0217598	-5.56638	0.889417
981	ADIPOR1	HGLibA_00981	GACAACGACTATCTGCTACA	0.536776	1.28603	0.0410392	0.0952331		0.177417	0.0740517	-2.49478	-3.75532	0.153877	83285	0.228014	0.125734	-3.12505	0.642039
982	ADIPOR2	HGLibA_00982	CTCATGATGTACTACCAGAC	11.4512	6.00149	0.205196	0.619015		0.0540567	0.103143	-4.20938	-3.27728	0.0931762	67575	0.170166	0.0786001	-3.74333	0.769127
983	ADIPOR2	HGLibA_00983	CTCTTCGTGTACCATCCAGT	29.7463	29.9003	0.656627	0.666632		0.0224106	0.0222951	-5.47968	-5.48713	6.99868e-06	143	0.00603996	0.0223528	-5.4834	2.21897
984	ADIPOR2	HGLibA_00984	CTTACAAGCCCATCATGCTA	12.9721	3.05433	0.164157	0.14285		0.0110121	0.0467695	-6.50477	-4.41829	0.253842	99866	0.31369	0.0288908	-5.46153	0.5035
985	ADIRF	HGLibA_00985	CTGGTTAGCAGTCTTGTCGA	0.357851	5.94791	0.123118	0.0952331		0.266125	0.0160112	-1.90982	-5.96478	0.389902	111822	0.430311	0.141068	-3.9373	0.366218
986	ADIRF	HGLibA_00986	CATCGACAAGACTGCTAACC	7.2912	17.7366	0.123118	0.333316		0.0457148	0.0187926	-4.4512	-5.73369	0.143002	80887	0.218181	0.0322537	-5.09244	0.661182
987	ADIRF	HGLibA_00987	CACTTGCTGAGCTGCCGCTC	11.3618	13.2354	0.164157	0.0476165		0.00419095	0.00359766	-7.89851	-8.11873	0.00587446	17606	0.0411776	0.0038943	-8.00862	1.38534
988	ADK	HGLibA_00988	AGCGCTCACCTCAGCGCTTG	4.20474	3.00075	0.0410392	0.14285		0.0339734	0.0476047	-4.87945	-4.39275	0.0283587	38707	0.0904172	0.0407891	-4.6361	1.04375
989	ADK	HGLibA_00989	TGGAGGCGCCGCAAGCGCTG	4.16001	1.87547	0.123118	0.0476165		0.0114462	0.0253892	-6.44898	-5.29964	0.124225	76390	0.200691	0.0184177	-5.87431	0.697473
990	ADK	HGLibA_00990	TTCAAAGTCGAATATCATGC	5.68088	5.57281	0.123118	0.238083		0.0419095	0.0427222	-4.57658	-4.54887	0.000209754	2643	0.00979415	0.0423158	-4.56273	2.00903
991	ADM	HGLibA_00991	CGACGCGACATCCAACCGAG	12.0775	11.1992	0.123118	0.238083		0.019713	0.0212589	-5.66471	-5.55579	0.00149065	8705	0.021133	0.0204859	-5.61025	1.67504
992	ADM	HGLibA_00992	TCCTAGGCGCTGACACCGCT	13.0615	10.717	0.205196	0.238083		0.0182278	0.0222155	-5.77772	-5.49229	0.0099467	22921	0.0535549	0.0202216	-5.635	1.2712
993	ADM	HGLibA_00993	ACAAGGACAACGTCGCCCCC	33.7274	15.5396	0.492471	0.619015		0.0183535	0.0398347	-5.7678	-4.64983	0.117945	74752	0.19472	0.0290941	-5.20882	0.710589
994	ADM2	HGLibA_00994	AACTCATGGGACCGGCCGGC	2.59442	0.964526	0.0410392	0.0952331		0.0367069	0.0987357	-4.7678	-3.34028	0.170701	86676	0.243047	0.0677213	-4.05404	0.61431
995	ADM2	HGLibA_00995	ACCCGCGACCCGTCAAACCC	0.402582	0.964526	0.0410392	0.0476165		0.118278	0.0493678	-3.07975	-4.34028	0.150729	82572	0.225278	0.0838229	-3.71002	0.647281
996	ADM2	HGLibA_00996	GTCTTCGGGGGCCCGAGTGT	2.23657	0.857356	0.0410392	0.0476165		0.02129	0.0555388	-5.55368	-4.17036	0.161186	84790	0.234605	0.0384144	-4.86202	0.629663
997	ADM5	HGLibA_00997	TCCAGTATATGATCTCCGCC	3.89162	0.910941	0.0820784	0.0476165		0.0122356	0.0522718	-6.35277	-4.25782	0.257498	100313	0.31679	0.0322537	-5.30529	0.499229
998	ADM5	HGLibA_00998	CCTACAGCTATGGGCGCCGC	19.0555	8.03771	0.369353	0.428549		0.0224895	0.0533173	-5.47461	-4.22925	0.139699	80058	0.215349	0.0379034	-4.85193	0.666857
999	ADM5	HGLibA_00999	CCCCTTGGGCGGAGAAGGCG	0.0447313	0.0535848	0.0410392	0.0476165		1.0645	0.888621	0.0901775	-0.17036	0.473465	117274	0.498242	0.976561	-0.0400912	0.30256
1000	ADNP	HGLibA_01000	ATCGAAGACCATGAACGTAT	2.01291	1.01811	0.0410392	0.0476165		0.0236556	0.0467695	-5.40168	-4.41829	0.0978265	68996	0.174979	0.0352126	-4.90998	0.757013
1001	ADNP	HGLibA_01001	TGCTCGTAAGTGCGCTTCAC	28.628	15.9683	0.451431	0.380932		0.0133063	0.0238556	-6.23175	-5.38953	0.0744567	61106	0.150374	0.0185809	-5.81064	0.822826
1002	ADNP	HGLibA_01002	CCCATCACTTACGAAAAACC	4.20474	3.48301	0.0410392	0.0476165		0.0113245	0.0136711	-6.46441	-6.19273	0.00890098	21594	0.0508697	0.0124978	-6.32857	1.29354
1003	ADNP2	HGLibA_01003	CTTTCCGTCCAACGTCTACC	9.48304	39.7599	0.53351	0.523782		0.0552336	0.0131736	-4.17831	-6.2462	0.252485	99702	0.312525	0.0342036	-5.21226	0.505115
1004	ADNP2	HGLibA_01004	CCGTCACGGGTTCTTCCCCC	0.0447313	0.0535848	0.0410392	0.0476165		1.0645	0.888621	0.0901775	-0.17036	0.473465	117275	0.498237	0.976561	-0.0400912	0.302564
1005	ADNP2	HGLibA_01005	GACCTTAAAGGCTTTGATCC	1.47613	2.73282	0.0410392	0.0476165		0.0322576	0.0174239	-4.95422	-5.84279	0.081778	63737	0.158343	0.0248408	-5.3985	0.800401
1006	ADO	HGLibA_01006	TTCGCGGGCCGAGTACACCG	1.78925	4.71546	0.0820784	0.0952331		0.0532251	0.0201959	-4.23175	-5.62979	0.163102	85188	0.236284	0.0367105	-4.93077	0.626566
1007	ADO	HGLibA_01007	GATCCAACGGATCGCCCGCC	1.16301	1.0717	0.0410392	0.0476165		0.0409424	0.044431	-4.61026	-4.49229	0.00181512	9709	0.0230719	0.0426867	-4.55128	1.63692
1008	ADO	HGLibA_01008	ACAAGCTAGACGCGGGCGGC	0.715701	2.73282	0.123118	0.0952331		0.133063	0.0348479	-2.90982	-4.84279	0.25048	99409	0.310958	0.0839553	-3.8763	0.507299
1009	ADORA1	HGLibA_01009	GGCGACCCGCAGAAGTACTA	0.268388	0.160754	0.0410392	0.0476165		0.177417	0.296207	-2.49478	-1.75532	0.0873597	65676	0.164157	0.236812	-2.12505	0.784742
1010	ADORA1	HGLibA_01010	CTCGAACTCGCACTTGATCA	1.34194	2.41131	0.0410392	0.0476165		0.0354834	0.0197471	-4.81671	-5.66221	0.0756242	61543	0.151648	0.0276153	-5.23946	0.819164
1011	ADORA1	HGLibA_01011	CTTCTGCTTCATCGTGTCGC	37.798	40.8316	0.738706	0.761865		0.0201562	0.0186587	-5.63263	-5.74401	0.0015435	8882	0.0214462	0.0194075	-5.68832	1.66865
1012	ADORA2A	HGLibA_01012	TCTGGCGGAACTCGCGGATA	5.1441	2.03622	0.0410392	0.0476165		0.00925653	0.0233848	-6.75531	-5.41829	0.150011	82424	0.224606	0.0163206	-6.0868	0.648578
1013	ADORA2A	HGLibA_01013	CTCCTCGGTGTACATCACGG	6.75443	6.80526	0.164157	0.190466		0.0281987	0.0279881	-5.14823	-5.15904	1.87893e-05	361	0.00642328	0.0280934	-5.15364	2.19224
1014	ADORA2A	HGLibA_01014	CGTGGCTGCGAATGATCTTG	6.62023	8.03771	0.164157	0.14285		0.0215777	0.0177724	-5.53431	-5.81422	0.00961767	22504	0.0527429	0.0196751	-5.67426	1.27784
1015	ADORA2B	HGLibA_01015	CATCGCCGCGCTTTCGGTGG	4.20474	8.94865	0.123118	0.14285		0.0339734	0.0159633	-4.87945	-5.9691	0.112995	73361	0.190084	0.0249683	-5.42428	0.721054
1016	ADORA2B	HGLibA_01016	GTTGCCCGCCACCGAAAGCG	5.32303	0.803771	0.164157	0.0476165		0.00894539	0.0592414	-6.80464	-4.07725	0.320883	106791	0.370823	0.0340934	-5.44095	0.430834
1017	ADORA2B	HGLibA_01017	GTTCCGGTAAGCATAGACAA	1.83398	5.51923	0.0820784	0.0476165		0.0259634	0.00862739	-5.26737	-6.85686	0.189053	90147	0.258813	0.0172954	-6.06212	0.587015
1018	ADORA3	HGLibA_01018	TCCGCAAGGCTGACCGCTCC	27.5545	24.8633	0.410392	0.333316		0.0120966	0.0134059	-6.36925	-6.22099	0.0027035	11835	0.0281911	0.0127513	-6.29512	1.54989
1019	ADORA3	HGLibA_01019	TCGCTGTGGACCGATACTTG	13.3747	16.0218	0.164157	0.0952331		0.00712041	0.00594395	-7.13382	-7.39436	0.00815882	20524	0.0490591	0.00653218	-7.26409	1.30928
1020	ADORA3	HGLibA_01020	CATTGGACTCTGCGCCATAG	3.48904	1.44679	0.0820784	0.0952331		0.0272949	0.0658238	-5.19522	-3.92525	0.145144	81392	0.220075	0.0465593	-4.56024	0.657428
1021	ADPGK	HGLibA_01021	TGTTCCACCAGAGTCATTGC	6.03873	11.092	0.164157	0.14285		0.0236556	0.0128786	-5.40168	-6.27888	0.0795988	63003	0.155919	0.0182671	-5.84028	0.807101
1022	ADPGK	HGLibA_01022	AGTCAATGCATGTGTTGATG	15.1192	15.486	0.287275	0.285699		0.0188965	0.0184489	-5.72574	-5.76032	0.000149149	2008	0.00916665	0.0186727	-5.74303	2.03779
1023	ADPGK	HGLibA_01023	TTCTCTCACGACCTCTCCAA	9.79616	6.05508	0.164157	0.14285		0.0145822	0.0235917	-6.09965	-5.40558	0.0533337	52542	0.125271	0.019087	-5.75261	0.902151
1024	ADPRH	HGLibA_01024	CGGCTTGGATGCCCTAGACG	2.46022	4.39395	0.0410392	0.0952331		0.0387091	0.0216737	-4.69118	-5.52791	0.0738525	60871	0.14973	0.0301914	-5.10955	0.824691
1025	ADPRH	HGLibA_01025	ATCCAAGTGAGCATCGAGAG	12.4353	9.10941	0.164157	0.238083		0.0191457	0.0261359	-5.70684	-5.25782	0.0238752	35594	0.0827797	0.0226408	-5.48233	1.08208
1026	ADPRH	HGLibA_01026	GGAGAAGATACACCGGCAGT	0.0447313	0.696602	0.0410392	0.0476165		1.0645	0.0683555	0.0901775	-3.8708	0.422193	115628	0.450611	0.566428	-1.89031	0.346198
1027	ADPRHL1	HGLibA_01027	GACCCTCATCGAGGTCAGCG	13.0168	5.57281	0.246235	0.285699		0.0219485	0.0512666	-5.50974	-4.28584	0.136094	79155	0.212185	0.0366075	-4.89779	0.673285
1028	ADPRHL1	HGLibA_01028	ACTCCACGCTGACCTCGATG	18.8766	15.5396	0.123118	0.285699		0.0151351	0.0183853	-6.04596	-5.76531	0.0095142	22391	0.0524388	0.0167602	-5.90563	1.28035
1029	ADPRHL1	HGLibA_01029	CCAGGCGAGAAGGTAGTTAT	6.5755	13.3962	0.205196	0.14285		0.0217245	0.0106635	-5.52453	-6.55118	0.102566	70431	0.179718	0.016194	-6.03786	0.745408
1030	ADPRHL2	HGLibA_01030	CTCAAAGACATCGCGACATT	7.78325	12.5388	0.123118	0.380932		0.0489426	0.0303802	-4.35277	-5.04072	0.0531859	52477	0.125078	0.0396614	-4.69675	0.902819
1031	ADPRHL2	HGLibA_01031	AGGAGCCTTTCCCGTTAAAC	5.45722	2.35773	0.0820784	0.0952331		0.0174508	0.0403919	-5.84056	-4.62979	0.132689	78393	0.208886	0.0289213	-5.23518	0.68009
1032	ADPRHL2	HGLibA_01032	TTACAATGGCGCCATCCTGC	19.816	9.69884	0.451431	0.761865		0.038447	0.0785521	-4.70099	-3.67021	0.107648	71822	0.18497	0.0584996	-4.1856	0.732899
1033	ADPRM	HGLibA_01033	ATGTCTGTAGTATCGCCGCC	6.35185	3.96527	0.123118	0.0952331		0.014993	0.0240168	-6.05957	-5.37981	0.0515734	51703	0.123102	0.0195049	-5.71969	0.909736
1034	ADPRM	HGLibA_01034	AACATCTGCGATGACGCCAA	6.97809	5.03697	0.123118	0.190466		0.0272949	0.0378137	-5.19522	-4.72495	0.0264628	37411	0.0872951	0.0325543	-4.96009	1.05901
1035	ADPRM	HGLibA_01035	CACACATTGTCAGAGGCGTC	2.50495	1.0717	0.0410392	0.0952331		0.0380179	0.0888621	-4.71718	-3.49229	0.138573	79754	0.214427	0.06344	-4.10473	0.66872
1036	ADRA1A	HGLibA_01036	GATCAAGAGAGACCTTCTAC	1.25248	0.643017	0.0410392	0.0476165		0.0380179	0.0740517	-4.71718	-3.75532	0.0974417	68874	0.1746	0.0560348	-4.23625	0.757957
1037	ADRA1A	HGLibA_01037	TTCACAAACGCCATCCGTCT	10.7355	18.2724	0.328314	0.380932		0.0354834	0.0208474	-4.81671	-5.58399	0.0641831	57139	0.138625	0.0281654	-5.20035	0.858158
1038	ADRA1A	HGLibA_01038	GGAAGCTGGCTTCATGTCAT	0.0447313	1.55396	0.0410392	0.0476165		1.0645	0.0306421	0.0901775	-5.02834	0.422448	116186	0.448717	0.547572	-2.46908	0.348027
1039	ADRA1B	HGLibA_01039	CGCGCTTTCGTGCGCATCCT	24.6022	24.7026	0.287275	0.190466		0.00774183	0.00771038	-7.01311	-7.01898	8.15485e-06	169	0.00595502	0.0077261	-7.01605	2.22512
1040	ADRA1B	HGLibA_01040	AGCGAGCCGCCGCGCGTCCA	0.0894626	3.53659	0.0410392	0.0476165		0.532251	0.013464	-0.909822	-6.21475	0.412702	113446	0.448954	0.272857	-3.56229	0.347798
1041	ADRA1B	HGLibA_01041	GTACTGCCGTGTCTATATAG	0.134194	4.39395	0.246235	0.0476165		0.354834	0.0108368	-1.49478	-6.52791	0.425375	116395	0.451016	0.182835	-4.01135	0.345808
1042	ADRA1D	HGLibA_01042	ATACCGCAGAAGCGCTCGTC	1.92345	3.59018	0.0410392	0.0476165		0.0247558	0.013263	-5.33609	-6.23645	0.0828342	64106	0.159465	0.0190094	-5.78627	0.797335
1043	ADRA1D	HGLibA_01043	TGCGCGCGACCACGTACACG	27.8676	46.0293	0.410392	0.428549		0.015378	0.00931035	-6.02299	-6.74695	0.0566025	53961	0.129452	0.0123442	-6.38497	0.88789
1044	ADRA1D	HGLibA_01044	CTGTCGCACAAGATCCGCGC	10.9592	5.09055	0.123118	0.14285		0.0130347	0.0280617	-6.2615	-5.15525	0.114904	73860	0.19199	0.0205482	-5.70838	0.716722
1045	ADRA2A	HGLibA_01045	GCCGCGCGACACCGACGCGC	10.4671	6.10866	0.123118	0.238083		0.0227458	0.0389746	-5.45826	-4.68132	0.0653007	57597	0.139917	0.0308602	-5.06979	0.854128
1046	ADRA2A	HGLibA_01046	CCCGACGGCCGTGAGCGTGT	5.59141	4.9298	0.164157	0.14285		0.025548	0.0289768	-5.29064	-5.10896	0.00417377	14788	0.0348315	0.0272624	-5.1998	1.45803
1047	ADRA2A	HGLibA_01047	TACGTCATCTCGTCGTGCAT	16.5059	32.7939	0.492471	0.571398		0.0346179	0.0174239	-4.85234	-5.84279	0.097616	68930	0.17477	0.0260209	-5.34756	0.757533
1048	ADRA2B	HGLibA_01048	ACGGGCGGCACAGGATCCTC	2.63915	3.8581	0.123118	0.0476165		0.0180424	0.012342	-5.79247	-6.34028	0.0353041	43202	0.10085	0.0151922	-6.06638	0.996325
1049	ADRA2B	HGLibA_01049	TGGAGTTGTACTCCAGCGCG	2.63915	2.30414	0.0820784	0.0476165		0.0180424	0.0206656	-5.79247	-5.59662	0.00485909	16015	0.037444	0.019354	-5.69455	1.42662
1050	ADRA2B	HGLibA_01050	AACGGACACTCGAAGTCCAC	7.06755	13.4498	0.205196	0.0476165		0.00673735	0.00354032	-7.2136	-8.1419	0.0865591	65434	0.163254	0.00513884	-7.67775	0.787137
1051	ADRA2C	HGLibA_01051	GCGTCCCCGACTACCGAAAA	3.13119	2.78641	0.328314	14.4278		4.60777	5.17793	2.20407	2.37237	0.594865	123235	0.595715	4.89285	2.28822	0.224962
1052	ADRA2C	HGLibA_01052	CTACGCGCGCATCTACCGAG	0.0894626	1.71471	0.0820784	0.0476165		0.532251	0.0277694	-0.909822	-5.17036	0.411253	113330	0.447835	0.28001	-3.04009	0.348882
1053	ADRA2C	HGLibA_01053	GCGGCCTCAACGACGAGACC	19.816	11.3064	0.328314	0.190466		0.00961175	0.0168459	-6.70099	-5.89146	0.0693844	59205	0.14463	0.0132288	-6.29622	0.839743
1054	ADRB1	HGLibA_01054	CCGCTTACCCGCACGCCCGT	5.94926	17.2543	0.205196	0.0952331		0.0160075	0.00551938	-5.9651	-7.50128	0.180034	88515	0.25101	0.0107635	-6.73319	0.60031
1055	ADRB1	HGLibA_01055	TACGGACGAGGCGATGGCGT	7.91744	3.69735	0.164157	0.190466		0.0240565	0.0515143	-5.37743	-4.27888	0.116438	74345	0.193285	0.0377854	-4.82816	0.713802
1056	ADRB1	HGLibA_01056	CCAACGGGCGTGCGGGTAAG	2.8628	3.91169	0.123118	0.0476165		0.0166328	0.0121729	-5.90982	-6.36018	0.0244326	36006	0.0837429	0.0144029	-6.135	1.07705
1057	ADRB2	HGLibA_01057	CGTCTGCAGACGCTCGAACT	2.1471	3.05433	0.0820784	0.14285		0.0665313	0.0467695	-3.90982	-4.41829	0.0317994	41068	0.0955586	0.0566504	-4.16405	1.01973
1058	ADRB2	HGLibA_01058	TGTAAACTTCCTTACGGATG	15.4323	18.1652	0.246235	0.523782		0.0339406	0.0288343	-4.88084	-5.11607	0.00692954	19121	0.0447247	0.0313875	-4.99846	1.34945
1059	ADRB2	HGLibA_01059	CCCTTTCCTGCGTGACGTCG	7.15701	10.2883	0.205196	0.0476165		0.00665313	0.00462823	-7.23175	-7.75532	0.0316833	41010	0.0953443	0.00564068	-7.49354	1.02071
1060	ADRB3	HGLibA_01060	TTACCTACCCGTCGAGCCGT	15.2534	20.8981	0.246235	0.190466		0.0124868	0.00911406	-6.32345	-6.77769	0.0240831	35760	0.083113	0.0108004	-6.55057	1.08033
1061	ADRB3	HGLibA_01061	GTGACCAACCCGCTGCGTTA	0.581507	2.83999	0.0410392	0.0476165		0.0818847	0.0167664	-3.61026	-5.89828	0.278014	102782	0.333813	0.0493256	-4.75427	0.476497
1062	ADRB3	HGLibA_01062	CAACGTGTTCGTGACTTCGC	5.81507	6.00149	0.0820784	0.476165		0.0818847	0.0793412	-3.61026	-3.65579	0.00149611	8721	0.0211714	0.0806129	-3.63302	1.67425
1063	ADRBK1	HGLibA_01063	TGTATGAGTCGAAGATCTCC	10.0198	11.2528	0.123118	0.14285		0.0142567	0.0126946	-6.13221	-6.29964	0.00342827	13365	0.0316563	0.0134756	-6.21593	1.49954
1064	ADRBK1	HGLibA_01064	CTTCGACTCATACATCATGA	14.4035	10.1275	0.246235	0.190466		0.0132236	0.0188068	-6.24074	-5.7326	0.0300859	39904	0.0930465	0.0160152	-5.98667	1.0313
1065	ADRBK1	HGLibA_01065	GGCCGACGTGAGCTACCTGA	11.8985	6.53734	0.287275	0.14285		0.0120057	0.0218513	-6.38014	-5.51613	0.0784241	62566	0.154691	0.0169285	-5.94814	0.810535
1066	ADRBK2	HGLibA_01066	CAGCAAGAGGATCGTCCTGC	10.825	17.2007	0.287275	0.428549		0.0395889	0.0249146	-4.65876	-5.32686	0.0504397	51158	0.121678	0.0322517	-4.99281	0.914787
1067	ADRBK2	HGLibA_01067	TTATGATGCCTACATCATGA	2.63915	3.10792	0.0410392	0.0476165		0.0180424	0.0153211	-5.79247	-6.02834	0.00679469	18941	0.0442711	0.0166817	-5.9104	1.35388
1068	ADRBK2	HGLibA_01068	CTGATTGAAAATCTTGTCAA	2.19183	0.535848	0.0410392	0.0476165		0.0217245	0.0888621	-5.52453	-3.49229	0.252047	99634	0.312197	0.0552933	-4.50841	0.505572
1069	ADRM1	HGLibA_01069	CGCCTAGCGCAGAGAGTTCG	9.08046	9.96677	0.0410392	0.0952331		0.0104877	0.00955506	-6.57516	-6.70952	0.00219751	10684	0.0253834	0.0100214	-6.64234	1.59545
1070	ADRM1	HGLibA_01070	CGCTTGAACTCACAGTCGTC	12.3011	12.5388	0.410392	0.285699		0.0232255	0.0227852	-5.42815	-5.45576	0.000123595	1765	0.00864191	0.0230053	-5.44195	2.06339
1071	ADRM1	HGLibA_01071	ACATCCGCGTTGGCGAGGAT	0.0447313	0.0535848	0.0410392	0.0476165		1.0645	0.888621	0.0901775	-0.17036	0.473465	117276	0.498233	0.976561	-0.0400912	0.302567
1072	ADSL	HGLibA_01072	CTCGGACACGCTTCAAGTTC	9.75143	7.93054	0.205196	0.238083		0.0244152	0.030021	-5.35608	-5.05789	0.0109774	24133	0.0561361	0.0272181	-5.20698	1.25076
1073	ADSL	HGLibA_01073	CGAGCCAGTCTACCCACATT	1.78925	3.48301	0.0820784	0.0476165		0.0266125	0.0136711	-5.23175	-6.19273	0.0935445	67680	0.170574	0.0201418	-5.71224	0.768088
1074	ADSL	HGLibA_01074	TCCGAGATGACCTGCGCTTC	8.45422	17.3615	0.0820784	0.333316		0.039426	0.0191986	-4.66471	-5.70286	0.104189	70883	0.181399	0.0293123	-5.18378	0.741366
1075	ADSS	HGLibA_01075	CCTTTCTAGGACTAGAAGGC	2.01291	2.73282	0.123118	0.0476165		0.0236556	0.0174239	-5.40168	-5.84279	0.0241315	35790	0.0832101	0.0205398	-5.62223	1.07982
1076	ADSS	HGLibA_01076	ATATCTGACAGAGCTCATAT	1.25248	1.55396	0.0820784	0.0952331		0.0760358	0.0612842	-3.71718	-4.02834	0.0129195	26225	0.0607971	0.06866	-3.87276	1.21612
1077	ADSS	HGLibA_01077	CCAATGAATGCAGTGACATT	2.2813	10.6634	0.164157	0.14285		0.0626177	0.0133963	-3.99729	-6.22202	0.270643	101759	0.32823	0.038007	-5.10965	0.483821
1078	ADSSL1	HGLibA_01078	CTCTCATGCAGGCAACGGGG	3.89162	4.17961	0.0410392	0.190466		0.0489426	0.0455703	-4.35277	-4.45576	0.00170831	9392	0.0224472	0.0472564	-4.40426	1.64884
1079	ADSSL1	HGLibA_01079	CCAGTCGATGTTCCCCACCC	50.6806	39.7599	0.574549	0.619015		0.012214	0.0155688	-6.35531	-6.0052	0.0146453	27983	0.0645889	0.0138914	-6.18026	1.18984
1080	ADSSL1	HGLibA_01080	ACATTGAAGGCCAACTCAAA	0.984089	5.14414	0.0820784	0.0476165		0.0483864	0.00925647	-4.36925	-6.75532	0.286075	103624	0.340701	0.0288214	-5.56229	0.467626
1081	ADTRP	HGLibA_01081	CCGGCTGATGTAAGCAATGC	8.58841	13.8249	0.328314	0.285699		0.0332657	0.0206656	-4.90982	-5.59662	0.0531473	52455	0.12504	0.0269656	-5.25322	0.902952
1082	ADTRP	HGLibA_01082	TAGATACTGTCATCCCCGTG	12.3906	7.98413	0.164157	0.238083		0.0192148	0.0298195	-5.70164	-5.0676	0.0453995	48662	0.115137	0.0245172	-5.38462	0.938785
1083	ADTRP	HGLibA_01083	GACGACTTCAGCCAATGTGA	9.25938	11.0385	0.0820784	0.0476165		0.00514252	0.00431369	-7.60331	-7.85686	0.00769459	20046	0.0473709	0.00472811	-7.73008	1.32449
1084	AEBP1	HGLibA_01084	GCTGACCGACGACGAGATCG	50.5464	156.092	567.613	1696.29		33.5591	10.8672	5.06863	3.44191	0.211217	93824	0.277823	22.2132	4.25527	0.556232
1085	AEBP1	HGLibA_01085	GAACTCCTCGATCTCGTCGT	6.53077	10.5026	0.123118	0.190466		0.0291644	0.0181351	-5.09965	-5.78507	0.0520775	51923	0.123778	0.0236498	-5.44236	0.907356
1086	AEBP1	HGLibA_01086	GGGCGCCCCTCTCAAATAAC	0.402582	1.01811	0.0410392	0.0952331		0.236556	0.093539	-2.07975	-3.41829	0.173208	87133	0.245324	0.165047	-2.74902	0.61026
1087	AEBP2	HGLibA_01087	TTTCTTCGATGCACAAACAC	7.64905	6.53734	0.164157	0.0952331		0.0124503	0.0145676	-6.32767	-6.1011	0.0063357	18316	0.0426892	0.0135089	-6.21439	1.36968
1088	AEBP2	HGLibA_01088	TGTGCATCGAAGAAATCATG	5.36776	11.8422	0.0820784	0.0952331		0.0177417	0.00804182	-5.81671	-6.95826	0.119202	75077	0.195944	0.0128918	-6.38749	0.707868
1089	AEBP2	HGLibA_01089	GTTCTGCTGACTGAAGTGTG	4.33894	4.82263	0.0820784	0.14285		0.0329227	0.0296207	-4.92477	-5.07725	0.00296248	12412	0.0294556	0.0312717	-5.00101	1.53083
1090	AEN	HGLibA_01090	TTGGGACATAGGTCGTATCC	16.9084	17.7901	0.287275	0.190466		0.0112646	0.0107063	-6.47206	-6.5454	0.000671166	5557	0.0149054	0.0109854	-6.50873	1.82666
1091	AEN	HGLibA_01091	TCGCTGACTACCGTACCCGC	2.23657	1.82188	0.0410392	0.0952331		0.04258	0.0522718	-4.55368	-4.25782	0.011179	24361	0.0566322	0.0474259	-4.40575	1.24694
1092	AEN	HGLibA_01092	CTACTGATGAGTGCCCGTGC	13.6878	29.3109	0.615588	0.190466		0.013915	0.00649814	-6.16721	-7.26576	0.114183	73686	0.191236	0.0102066	-6.71648	0.71843
1093	AES	HGLibA_01093	CACGTCCGTGGCACGCGTCC	27.7781	25.6671	0.246235	0.571398		0.0205701	0.0222619	-5.60331	-5.48928	0.00164316	9187	0.022073	0.021416	-5.54629	1.65614
1094	AES	HGLibA_01094	TCCAGGCTGAGATCGTCAAA	2.77334	6.323	0.123118	0.0952331		0.0343387	0.0150614	-4.86402	-6.053	0.129527	77713	0.205693	0.0247001	-5.45851	0.68678
1095	AES	HGLibA_01095	CACGACCTGGACGCGTGCCA	14.0009	16.2362	0.164157	0.380932		0.0272077	0.0234619	-5.19984	-5.41353	0.00567209	17234	0.0406173	0.0253348	-5.30669	1.39129
1096	AFAP1	HGLibA_01096	ATAAGAGCTGCTCATCGCAT	6.03873	7.76979	0.123118	0.0952331		0.0157704	0.0122568	-5.98664	-6.35027	0.0158442	29058	0.0672913	0.0140136	-6.16845	1.17204
1097	AFAP1	HGLibA_01097	TTATGAGTCGTATGATGAAG	1.87872	3.00075	0.0410392	0.0476165		0.0253453	0.0158682	-5.30214	-5.97771	0.0507171	51277	0.122063	0.0206067	-5.63993	0.913415
1098	AFAP1	HGLibA_01098	ATCTCCGGCAGGGGCATCTG	2.8628	1.71471	0.0820784	0.0476165		0.0166328	0.0277694	-5.90982	-5.17036	0.0606815	55694	0.134463	0.0222011	-5.54009	0.871398
1099	AFAP1L1	HGLibA_01099	GTACCTCAGCGATACCACCC	4.07055	13.5034	0.205196	0.0952331		0.0233956	0.00705255	-5.41762	-7.14764	0.208565	93439	0.275465	0.0152241	-6.28263	0.559933
1100	AFAP1L1	HGLibA_01100	GCACGAGCTGCGTTTCACCC	5.77034	11.3064	0.123118	0.0952331		0.0165039	0.00842295	-5.92105	-6.89146	0.0930351	67536	0.170007	0.0124634	-6.40625	0.769534
1101	AFAP1L1	HGLibA_01101	GGGCACGTAGATGATGCTGC	4.87571	15.2717	0.123118	0.14285		0.0292982	0.0093539	-5.09304	-6.74022	0.195962	91407	0.264574	0.0193261	-5.91663	0.577453
1102	AFAP1L2	HGLibA_01102	GCCCCGATGGAGCGGTACAA	1.69979	3.53659	0.0410392	0.0952331		0.0560264	0.0269279	-4.15775	-5.21475	0.109002	72235	0.186227	0.0414771	-4.68625	0.729958
1103	AFAP1L2	HGLibA_01103	AAAGCCGGAGGAGCTCCGCC	1.74452	1.01811	0.0410392	0.0952331		0.0545898	0.093539	-4.19522	-3.41829	0.0690521	59088	0.144222	0.0740644	-3.80676	0.840968
1104	AFAP1L2	HGLibA_01104	CTTCCTCAAGATTCTTGACC	17.6689	11.7351	0.287275	0.285699		0.0161696	0.0243458	-5.95057	-5.36018	0.0398448	45768	0.107439	0.0202577	-5.65538	0.968837
1105	AFF1	HGLibA_01105	CCTGGTTTAGAGTTACCATT	8.32002	3.32226	0.123118	0.333316		0.0400619	0.100328	-4.64163	-3.3172	0.154832	83477	0.228902	0.070195	-3.97941	0.640351
1106	AFF1	HGLibA_01106	TACTTGTCAAACTTCACTTG	16.64	11.7886	0.205196	0.380932		0.0228925	0.0323135	-5.44898	-4.95172	0.0290812	39165	0.0916365	0.027603	-5.20035	1.03793
1107	AFF1	HGLibA_01107	CCTTCAGCTCAGTGACAGTG	3.93636	4.28678	0.164157	0.14285		0.0362898	0.0333233	-4.78429	-4.90733	0.00196105	10057	0.0240643	0.0348065	-4.84581	1.61863
1108	AFF2	HGLibA_01108	GAATTCGCCGTGCAAGCGCC	3.44431	4.50112	0.0820784	0.0952331		0.0276494	0.0211576	-5.17661	-5.56268	0.0180123	31071	0.0715431	0.0244035	-5.36964	1.14543
1109	AFF2	HGLibA_01109	CATAGTTTCCAAGCGTGTTC	5.05464	5.14414	0.123118	0.0952331		0.0188407	0.0185129	-5.73	-5.75532	8.82082e-05	1386	0.00785415	0.0186768	-5.74266	2.1049
1110	AFF2	HGLibA_01110	AAGATTTCTTCAACACAGCT	0.268388	1.0717	0.0410392	0.0476165		0.177417	0.044431	-2.49478	-4.49229	0.259596	100537	0.318659	0.110924	-3.49354	0.496674
1111	AFF3	HGLibA_01111	AGAAACCGACCGCGTATGTG	0.0447313	0.750187	0.0410392	0.0476165		1.0645	0.0634729	0.0901775	-3.97771	0.422226	115701	0.450362	0.563987	-1.94377	0.346438
1112	AFF3	HGLibA_01112	TCCGAAGACGACTTCAGCTT	7.02282	10.7705	0.164157	0.190466		0.027121	0.017684	-5.20444	-5.82141	0.0432157	47570	0.112115	0.0224025	-5.51293	0.950338
1113	AFF3	HGLibA_01113	TGTAGTGCTACAGATAGACG	8.67788	11.5743	0.123118	0.238083		0.0274356	0.0205699	-5.18781	-5.60332	0.0205838	33154	0.0766202	0.0240028	-5.39556	1.11566
1114	AFF4	HGLibA_01114	GGGCAACTTACAACTTTGTA	2.19183	1.44679	0.0410392	0.0476165		0.0217245	0.0329119	-5.52453	-4.92525	0.0413383	46560	0.10957	0.0273182	-5.22489	0.960306
1115	AFF4	HGLibA_01115	GCAACATGAACCGTGAAGAC	1.16301	3.00075	0.0820784	0.0476165		0.0409424	0.0158682	-4.61026	-5.97771	0.159398	84431	0.232988	0.0284053	-5.29399	0.632666
1116	AFF4	HGLibA_01116	GAGTCTCAGCAGTCCAATTT	3.04173	4.50112	0.0410392	0.0952331		0.0313089	0.0211576	-4.99729	-5.56268	0.0367485	44044	0.102969	0.0262332	-5.27998	0.987293
1117	AFG3L2	HGLibA_01117	ATGGGCGGACTCTTCAGTGT	0.134194	0.964526	0.0410392	0.0476165		0.354834	0.0493678	-1.49478	-4.34028	0.3479	109019	0.393828	0.202101	-2.91753	0.404694
1118	AFG3L2	HGLibA_01118	TGAAGAGTCCGCCCATCCCT	4.24947	3.37584	0.0410392	0.14285		0.0336158	0.0423153	-4.89472	-4.56268	0.0136842	27011	0.062522	0.0379656	-4.7287	1.20397
1119	AFG3L2	HGLibA_01119	AGTTTCCAGATTCCGTTCAA	0.357851	0.428678	0.0410392	0.0476165		0.133063	0.111078	-2.90982	-3.17036	0.01023	23247	0.054308	0.12207	-3.04009	1.26514
1120	AFM	HGLibA_01120	AATTTCTTACCTATATCCCG	1.02882	0.535848	0.0820784	0.0476165		0.0462827	0.0888621	-4.43338	-3.49229	0.100956	69939	0.178142	0.0675724	-3.96284	0.749233
1121	AFM	HGLibA_01121	TAACCCTGCCCACACAACCT	11.8091	13.9856	0.205196	0.238083		0.020161	0.0170234	-5.63229	-5.87634	0.00729228	19586	0.0459485	0.0185922	-5.75431	1.33773
1122	AFM	HGLibA_01122	TGCATTTGCTCAGTATGTTC	19.1897	9.00224	0.123118	0.190466		0.00992542	0.0211576	-6.65466	-5.56268	0.111623	73030	0.188628	0.0155415	-6.10867	0.724393
1123	AFMID	HGLibA_01123	ACAACCTTCAGACGACTCGT	0.760432	3.37584	0.0820784	0.0476165		0.0626177	0.0141051	-3.99729	-6.14764	0.265259	101161	0.323602	0.0383614	-5.07246	0.489989
1124	AFMID	HGLibA_01124	GCTTACGGCATCGCCCCCAA	2.37076	1.92905	0.0410392	0.14285		0.0602548	0.0740517	-4.05278	-3.75532	0.0119125	25176	0.0583942	0.0671533	-3.90405	1.23363
1125	AFMID	HGLibA_01125	TTCCCCGACGAGTCGTCTGA	3.7127	11.1992	0.0820784	0.0952331		0.0256506	0.00850355	-5.28486	-6.87772	0.187908	89904	0.25794	0.0170771	-6.08129	0.588481
1126	AFP	HGLibA_01126	AACTTATCTCTGCAGTACAT	5.68088	14.2	0.0820784	0.285699		0.0502914	0.0201197	-4.31354	-5.63525	0.149184	82256	0.223825	0.0352056	-4.9744	0.650092
1127	AFP	HGLibA_01127	TGAAGACTGTTCATCTCCAG	7.55959	11.4671	0.164157	0.14285		0.0188965	0.0124573	-5.72574	-6.32686	0.0409177	46354	0.108938	0.0156769	-6.0263	0.962822
1128	AFP	HGLibA_01128	TTCAGGGTGTTTAGAAAACC	0.760432	2.35773	0.0410392	0.0476165		0.0626177	0.0201959	-3.99729	-5.62979	0.198328	91802	0.266615	0.0414068	-4.81354	0.574115
1129	AFTPH	HGLibA_01129	GACAGCTTTATTAAACCGCC	1.69979	1.12528	0.0820784	0.0952331		0.0560264	0.0846306	-4.15775	-3.56268	0.044018	47988	0.113201	0.0703285	-3.86021	0.946148
1130	AFTPH	HGLibA_01130	ATGCTTCGAAAATTCGCTCC	11.4065	7.44828	0.205196	0.0476165		0.00417451	0.00639296	-7.90418	-7.2893	0.0424802	47138	0.111216	0.00528374	-7.59674	0.953831
1131	AFTPH	HGLibA_01131	ATGTACATCTGATCAGTTCC	17.2216	19.0226	0.246235	0.523782		0.0304143	0.0275347	-5.03911	-5.1826	0.00262844	11676	0.0277816	0.0289745	-5.11085	1.55624
1132	AGA	HGLibA_01132	ACCACCTGGTATCTTAAAGC	2.95227	2.08981	0.0820784	0.0952331		0.0322576	0.0455703	-4.95422	-4.45576	0.0300293	39854	0.0929879	0.038914	-4.70499	1.03157
1133	AGA	HGLibA_01133	TGCAGCACTACTATGGATGT	21.7842	12.6996	0.287275	0.380932		0.0174867	0.0299956	-5.8376	-5.0591	0.0652007	57545	0.13983	0.0237412	-5.44835	0.854401
1134	AGA	HGLibA_01134	GTGCATACCCTCCAATAATT	0.357851	0.910941	0.0410392	0.14285		0.399188	0.156815	-1.32486	-2.67286	0.193501	90967	0.262514	0.278002	-1.99886	0.580847
1135	AGAP1	HGLibA_01135	CCTGACGGGCACATATGTCC	13.8667	12.0566	0.123118	0.0952331		0.00686775	0.00789885	-7.18595	-6.98414	0.00492353	16104	0.0377309	0.0073833	-7.08504	1.4233
1136	AGAP1	HGLibA_01136	GGTGGACCGACTCGAAGCGC	1.16301	3.05433	0.0820784	0.0476165		0.0409424	0.0155898	-4.61026	-6.00325	0.163263	85225	0.236414	0.0282661	-5.30676	0.626326
1137	AGAP1	HGLibA_01137	CATATGTGCCCGTCAGGTAC	2.46022	3.69735	0.0820784	0.0952331		0.0387091	0.0257571	-4.69118	-5.27888	0.040234	45997	0.107949	0.0322331	-4.98503	0.966782
1138	AGAP11	HGLibA_01138	GCTATACTTCTTGTAGTTCA	5.09937	4.87621	0.0410392	0.0952331		0.0186755	0.0195301	-5.74271	-5.67815	0.000544281	4905	0.0136942	0.0191028	-5.71043	1.86346
1139	AGAP11	HGLibA_01139	ACTTTGATATAATGCCTCAT	16.7295	12.9675	0.287275	0.190466		0.011385	0.0146879	-6.45672	-6.08922	0.0161861	29396	0.0679527	0.0130365	-6.27297	1.16779
1140	AGAP11	HGLibA_01140	CATCTTCTTCATCCCCTAGC	3.98109	3.69735	0.164157	0.190466		0.0478427	0.0515143	-4.38556	-4.27888	0.00151041	8770	0.0212545	0.0496785	-4.33222	1.67255
1141	AGAP2	HGLibA_01141	GGTGGACGACCCCGAACTCC	12.9721	4.60829	0.0820784	0.14285		0.0110121	0.0309984	-6.50477	-5.01166	0.173667	87315	0.245461	0.0210052	-5.75822	0.610017
1142	AGAP2	HGLibA_01142	AGCAGGCTCTAAACCGCCTC	12.1222	3.05433	0.0820784	0.14285		0.0117841	0.0467695	-6.40701	-4.41829	0.240957	98150	0.302973	0.0292768	-5.41265	0.518596
1143	AGAP2	HGLibA_01143	TTACCTACCAGGCGCAGTTC	32.6091	33.0618	0.369353	0.428549		0.013142	0.0129621	-6.24967	-6.26956	4.95179e-05	876	0.00697608	0.013052	-6.25962	2.15639
1144	AGAP3	HGLibA_01144	CATAGGTCCCCGTCAGATAG	3.35485	1.3932	0.123118	0.0952331		0.0283867	0.0683555	-5.13864	-3.8708	0.147248	81821	0.222094	0.0483711	-4.50472	0.653463
1145	AGAP3	HGLibA_01145	GGGCTGACTTCCCGCTAGAC	3.48904	6.05508	0.123118	0.0476165		0.0136475	0.0078639	-6.19522	-6.99054	0.0675017	58454	0.142513	0.0107557	-6.59288	0.846145
1146	AGAP3	HGLibA_01146	CAGCTTCCGCAACGCCAGCG	5.94926	7.60904	0.287275	0.190466		0.0320151	0.0250316	-4.9651	-5.32011	0.0157742	28996	0.0671371	0.0285233	-5.14261	1.17304
1147	AGAP4	HGLibA_01147	TAACCCTTCTGCCAATCCAG	10.7802	19.7192	0.205196	0.190466		0.0176681	0.00965892	-5.82271	-6.69392	0.0779961	62375	0.154318	0.0136635	-6.25832	0.811584
1148	AGAP4	HGLibA_01148	CATCTGTTTGAGAGTTCCTC	86.0631	60.3364	1.10806	1.28565		0.0149384	0.021308	-6.06483	-5.55246	0.0304662	40163	0.0936152	0.0181232	-5.80865	1.02865
1149	AGAP4	HGLibA_01149	TTGTCATTGTAAGATAATGC	46.118	31.6686	0.902863	0.714248		0.0154874	0.0225538	-6.01276	-5.47048	0.0341589	42500	0.0991903	0.0190206	-5.74162	1.00353
1150	AGAP5	HGLibA_01150	TAGCCTTTCTGCCAATCCAG	5.59141	3.64376	0.123118	0.0952331		0.017032	0.0261359	-5.87561	-5.25782	0.0436346	47767	0.112735	0.021584	-5.56671	0.947943
1151	AGAP5	HGLibA_01151	CATCTGTTTGAGAGTTCCTC	0.0447313	0.0535848	0.0410392	0.0476165		1.0645	0.888621	0.0901775	-0.17036	0.473465	117277	0.498229	0.976561	-0.0400912	0.302571
1152	AGAP5	HGLibA_01152	TAACCCTTCTGCCAATCCAG	0.0447313	0.0535848	0.0410392	0.0476165		1.0645	0.888621	0.0901775	-0.17036	0.473465	117278	0.498225	0.976561	-0.0400912	0.302575
1153	AGAP6	HGLibA_01153	TATTGTGCTTGACTCTGGAT	3.48904	4.71546	0.164157	0.0476165		0.0136475	0.010098	-6.19522	-6.62979	0.0229425	34904	0.0811184	0.0118727	-6.41251	1.09088
1154	AGAP6	HGLibA_01154	AGTCAAGCACAATATTCCAG	0.894626	2.25056	0.0410392	0.0952331		0.10645	0.0423153	-3.23175	-4.56268	0.156891	83911	0.230745	0.0743827	-3.89721	0.636868
1155	AGAP6	HGLibA_01155	CATCTGTTTGAGAGTTCCTC	0.0447313	0.0535848	0.0410392	0.0476165		1.0645	0.888621	0.0901775	-0.17036	0.473465	117279	0.49822	0.976561	-0.0400912	0.302579
1156	AGAP7	HGLibA_01156	TAACCCTTCTGCCAATCCAG	0.0447313	0.0535848	0.0410392	0.0476165		1.0645	0.888621	0.0901775	-0.17036	0.473465	117280	0.498216	0.976561	-0.0400912	0.302582
1157	AGAP7	HGLibA_01157	CATCTGTTTGAGAGTTCCTC	0.0447313	0.0535848	0.0410392	0.0476165		1.0645	0.888621	0.0901775	-0.17036	0.473465	117281	0.498212	0.976561	-0.0400912	0.302586
1158	AGAP7	HGLibA_01158	TTGTCATTGTAAGATAATGC	0.0447313	0.0535848	0.0410392	0.0476165		1.0645	0.888621	0.0901775	-0.17036	0.473465	117282	0.498208	0.976561	-0.0400912	0.30259
1159	AGAP8	HGLibA_01159	TAACCCTTCTGCCAATCCAG	0.0447313	0.0535848	0.0410392	0.0476165		1.0645	0.888621	0.0901775	-0.17036	0.473465	117283	0.498203	0.976561	-0.0400912	0.302593
1160	AGAP8	HGLibA_01160	CATCTGTTTGAGAGTTCCTC	0.0447313	0.0535848	0.0410392	0.0476165		1.0645	0.888621	0.0901775	-0.17036	0.473465	117284	0.498199	0.976561	-0.0400912	0.302597
1161	AGAP8	HGLibA_01161	TTGTCATTGTAAGATAATGC	0.0447313	0.0535848	0.0410392	0.0476165		1.0645	0.888621	0.0901775	-0.17036	0.473465	117285	0.498195	0.976561	-0.0400912	0.302601
1162	AGAP9	HGLibA_01162	CATCTGTTTGAGAGTTCCTC	0.0447313	0.0535848	0.0410392	0.0476165		1.0645	0.888621	0.0901775	-0.17036	0.473465	117286	0.498191	0.976561	-0.0400912	0.302605
1163	AGAP9	HGLibA_01163	TAACCTTTCTGCCAATCCAG	4.20474	6.69809	0.0820784	0.0476165		0.0113245	0.00710897	-6.46441	-7.13614	0.0496214	50762	0.120638	0.00921672	-6.80028	0.918516
1164	AGAP9	HGLibA_01164	TAACTCTTCTGCCAATCCAG	2.54968	6.16225	0.0410392	0.0952331		0.0373509	0.0154543	-4.74271	-6.01585	0.140925	80390	0.216342	0.0264026	-5.37928	0.66486
1165	AGBL1	HGLibA_01165	CGTAGGCGTTGGCTGTGTCA	23.2156	25.8279	0.53351	0.238083		0.0102553	0.00921806	-6.60749	-6.76132	0.00295292	12391	0.0294103	0.00973668	-6.6844	1.5315
1166	AGBL1	HGLibA_01166	ACGCCTACGTGCAGATCCGA	5.72561	9.59167	0.0820784	0.190466		0.0332657	0.0198575	-4.90982	-5.65418	0.060182	55493	0.133839	0.0265616	-5.282	0.873418
1167	AGBL1	HGLibA_01167	GAAAGCGCACCCAAGCAATC	2.2813	0.643017	0.0820784	0.0476165		0.0208726	0.0740517	-5.58225	-3.75532	0.230229	96696	0.293836	0.0474622	-4.66879	0.531895
1168	AGBL2	HGLibA_01168	TACCGTCACCTCCAATATTA	5.50195	6.323	0.0820784	0.0952331		0.017309	0.0150614	-5.85234	-6.053	0.00493346	16114	0.0377835	0.0161852	-5.95267	1.4227
1169	AGBL2	HGLibA_01169	CCCCAAGAGAGCCATTCAAC	0.894626	2.89358	0.0410392	0.0476165		0.0532251	0.0164559	-4.23175	-5.92525	0.205424	92945	0.272759	0.0348405	-5.0785	0.564221
1170	AGBL2	HGLibA_01170	AACCCTCAATGCCTGTTGAA	13.7772	8.14488	0.205196	0.190466		0.0138247	0.0233848	-6.17661	-5.41829	0.0621466	56286	0.136261	0.0186047	-5.79745	0.865629
1171	AGBL3	HGLibA_01171	TGAGCCAGTGTATATCCCAA	8.90153	7.50187	0.164157	0.14285		0.0160478	0.0190419	-5.96148	-5.71468	0.00747824	19830	0.0465404	0.0175448	-5.83808	1.33217
1172	AGBL3	HGLibA_01172	GGCCACCGTGTTGGGCTCAA	7.87271	13.289	0.164157	0.0952331		0.0120966	0.0071663	-6.36925	-7.12456	0.0610692	55846	0.134953	0.00963145	-6.74691	0.869816
1173	AGBL3	HGLibA_01173	GGTTCCGTTTCTAAGCCCGT	6.03873	6.05508	0.123118	0.190466		0.0315408	0.0314556	-4.98664	-4.99054	3.46096e-05	635	0.00672631	0.0314982	-4.98859	2.17222
1174	AGBL4	HGLibA_01174	GTAATCCACGCTTCCGAGTC	8.05164	1.71471	0.123118	0.190466		0.0236556	0.111078	-5.40168	-3.17036	0.274316	102260	0.331055	0.0673666	-4.28602	0.4801
1175	AGBL4	HGLibA_01175	TGTTTACTACTACCGCTGCC	3.48904	10.0203	0.164157	0.285699		0.0818847	0.0285119	-3.61026	-5.13229	0.183615	89116	0.254276	0.0551983	-4.37128	0.594694
1176	AGBL4	HGLibA_01176	TTACTTCTTTCGGGAGCAGC	3.35485	4.87621	0.0820784	0.0952331		0.0283867	0.0195301	-5.13864	-5.67815	0.0338831	42364	0.0987051	0.0239584	-5.4084	1.00566
1177	AGBL5	HGLibA_01177	TCTCGAATGCGTTCCCAGCG	23.3945	19.1833	0.287275	0.333316		0.0142476	0.0173753	-6.13313	-5.84682	0.00992506	22881	0.0535318	0.0158114	-5.98998	1.27139
1178	AGBL5	HGLibA_01178	CCTCGACCATTCCGTTTCGC	3.22065	1.50037	0.0820784	0.0476165		0.0147847	0.0317365	-6.07975	-4.97771	0.116421	74341	0.193267	0.0232606	-5.52873	0.713842
1179	AGBL5	HGLibA_01179	GCTGGGAACGCATTCGAGAC	1.83398	4.5547	0.123118	0.14285		0.0778903	0.0313631	-3.68241	-4.99479	0.153314	83163	0.227513	0.0546267	-4.3386	0.642993
1180	AGER	HGLibA_01180	TCTTACGGTAGACACGGACT	21.1579	20.4694	0.451431	0.190466		0.00900212	0.00930493	-6.79552	-6.74779	0.000322609	3534	0.0112659	0.00915353	-6.77165	1.94824
1181	AGER	HGLibA_01181	CAAAACATCACAGCCCGGAT	3.80216	4.5547	0.0410392	0.0476165		0.0125235	0.0104544	-6.31921	-6.57975	0.00818307	20552	0.0491378	0.011489	-6.44948	1.30858
1182	AGER	HGLibA_01182	TCCCGACAGCCGGAAGGAAG	4.96518	6.37659	0.246235	0.14285		0.0287703	0.0224022	-5.11928	-5.48022	0.0162883	29495	0.0681526	0.0255863	-5.29975	1.16652
1183	AGFG1	HGLibA_01183	CCCCACCTACGTTAACATGA	1.07355	1.82188	0.0820784	0.0476165		0.0443542	0.0261359	-4.49478	-5.25782	0.066166	57940	0.140932	0.0352451	-4.8763	0.85099
1184	AGFG1	HGLibA_01184	TGCTTCGACTGCGACCAGCG	5.18883	6.43017	0.123118	0.14285		0.0275302	0.0222155	-5.18284	-5.49229	0.0117479	25020	0.0579464	0.0248729	-5.33756	1.23697
1185	AGFG1	HGLibA_01185	GAGGATTAAATCCACCACAC	2.46022	4.12603	0.0820784	0.14285		0.0580637	0.0346216	-4.10622	-4.85218	0.0623149	56348	0.136479	0.0463426	-4.4792	0.864933
1186	AGFG2	HGLibA_01186	GAGATTGACTTGACACGATG	10.2882	17.5758	0.164157	0.428549		0.0416544	0.0243829	-4.58539	-5.35799	0.0646471	57325	0.139174	0.0330186	-4.97169	0.856441
1187	AGFG2	HGLibA_01187	ATCACCCAGAAGTGTCCGAA	5.72561	7.0196	0.205196	0.0952331		0.0166328	0.0135667	-5.90982	-6.20378	0.010715	23853	0.0554373	0.0150998	-6.0568	1.2562
1188	AGFG2	HGLibA_01188	GAGAGTTACCTGGCTCGAGG	1.61033	1.82188	0.0820784	0.0476165		0.0295695	0.0261359	-5.07975	-5.25782	0.00418596	14809	0.0348838	0.0278527	-5.16879	1.45738
1189	AGGF1	HGLibA_01189	TCTATAGTATTTCCACTAGT	1.20775	0.803771	0.0410392	0.0476165		0.039426	0.0592414	-4.66471	-4.07725	0.0414255	46606	0.109693	0.0493337	-4.37098	0.95982
1190	AGGF1	HGLibA_01190	GACGAAGCCATTACCAGTGA	8.90153	2.08981	0.0820784	0.0952331		0.0106985	0.0455703	-6.54645	-4.45576	0.253304	99798	0.313237	0.0281344	-5.5011	0.504126
1191	AGGF1	HGLibA_01191	AGCTAATGATGAGCCTTCTA	3.35485	2.83999	0.0410392	0.0476165		0.0141933	0.0167664	-6.13864	-5.89828	0.0070356	19249	0.0451073	0.0154799	-6.01846	1.34575
1192	AGK	HGLibA_01192	AACTACCCTTTGCAAGCTGC	13.8667	22.3984	0.246235	0.476165		0.0343387	0.0212589	-4.86402	-5.55579	0.0531098	52431	0.125009	0.0277988	-5.2099	0.90306
1193	AGK	HGLibA_01193	ACGGATGTGATCATTGTTGC	12.6142	10.717	0.246235	0.285699		0.022649	0.0266586	-5.46441	-5.22925	0.00685685	19028	0.0444719	0.0246538	-5.34683	1.35191
1194	AGK	HGLibA_01194	TGTTCTTCGACGAACAGATG	17.8925	27.8105	0.53351	0.285699		0.0159675	0.0102731	-5.96872	-6.60499	0.0455461	48759	0.115279	0.0131203	-6.28685	0.93825
1195	AGL	HGLibA_01195	ATCAGCACCAACACGTAAAA	2.10237	1.23245	0.0820784	0.0476165		0.022649	0.0386357	-5.46441	-4.69392	0.0665062	58058	0.141369	0.0306423	-5.07917	0.849646
1196	AGL	HGLibA_01196	TATGAGCTACAGTTCCGATT	3.04173	4.9298	0.164157	0.0952331		0.0313089	0.0193178	-4.99729	-5.69392	0.055102	53299	0.127586	0.0253134	-5.3456	0.894198
1197	AGL	HGLibA_01197	TGATAATCATGTGCTACCCT	7.06755	14.1464	0.164157	0.190466		0.0269494	0.013464	-5.2136	-6.21475	0.098453	69159	0.175685	0.0202067	-5.71418	0.755266
1198	AGMAT	HGLibA_01198	CACCGGCCGGGCCACGAACT	2.59442	2.94716	0.0410392	0.14285		0.0550604	0.0484702	-4.18284	-4.36676	0.00466307	15651	0.0367691	0.0517653	-4.2748	1.43452
1199	AGMAT	HGLibA_01199	GATTCGGACCTCGCCGCATC	5.94926	3.37584	0.0820784	0.0476165		0.00800377	0.0141051	-6.9651	-6.14764	0.0701882	59486	0.145614	0.0110544	-6.55637	0.836797
1200	AGMAT	HGLibA_01200	CAGCTGCCGGCGAATTCAAG	3.26539	2.89358	0.0410392	0.0952331		0.0291644	0.0329119	-5.09965	-4.92525	0.00386957	14224	0.0335733	0.0310382	-5.01245	1.47401
1201	AGMO	HGLibA_01201	GCTTTAACGTCAATCTCAGC	8.23056	9.53809	0.164157	0.0476165		0.00578533	0.00499225	-7.43338	-7.64609	0.00554394	17015	0.0402106	0.00538879	-7.53974	1.39566
1202	AGMO	HGLibA_01202	TTGACGTTAAAGCATCATCC	40.1687	24.5954	0.656627	0.571398		0.014225	0.0232319	-6.13543	-5.42775	0.0551568	53326	0.127648	0.0187284	-5.78159	0.893986
1203	AGMO	HGLibA_01203	AAAACAACATGCGAAATCCC	1.07355	3.1615	0.0410392	0.0952331		0.0887084	0.0301227	-3.49478	-5.053	0.188717	90056	0.258614	0.0594156	-4.27389	0.587347
1204	AGO1	HGLibA_01204	TCAGCGCGTTCGCTTCACCA	39.1846	32.3652	0.574549	0.571398		0.0145822	0.0176547	-6.09965	-5.8238	0.00925218	22065	0.0517481	0.0161185	-5.96172	1.28611
1205	AGO1	HGLibA_01205	CCTCCTGAAGGTCGACTTTG	3.89162	2.78641	0.0820784	0.14285		0.0367069	0.0512666	-4.7678	-4.28584	0.0281839	38596	0.0901181	0.0439868	-4.52682	1.04519
1206	AGO1	HGLibA_01206	GAACGCGCTGAGAGTCCGTG	6.03873	3.10792	0.123118	0.14285		0.0236556	0.0459632	-5.40168	-4.44338	0.0938392	67753	0.170927	0.0348094	-4.92253	0.76719
1207	AGO2	HGLibA_01207	TAACGCCTGCAAGCTCACGC	7.06755	14.5751	0.328314	0.333316		0.0471614	0.0228689	-4.40625	-5.45047	0.107739	71847	0.185062	0.0350152	-4.92836	0.732682
1208	AGO2	HGLibA_01208	GCGTTACACGATGCACTTTC	7.15701	3.8581	0.123118	0.0952331		0.0133063	0.0246839	-6.23175	-5.34028	0.0820394	63834	0.158608	0.0189951	-5.78602	0.799676
1209	AGO2	HGLibA_01209	GCCACCATGTACTCGGGAGC	9.34884	1.28603	0.0410392	0.0952331		0.0101866	0.0740517	-6.61718	-3.75532	0.322663	106938	0.372366	0.0421192	-5.18625	0.429029
1210	AGO3	HGLibA_01210	AAGGCATTACTTCTAGTGGC	5.05464	8.94865	0.123118	0.14285		0.0282611	0.0159633	-5.14504	-5.9691	0.0718057	60118	0.147404	0.0221122	-5.55707	0.831491
1211	AGO3	HGLibA_01211	TCAGACTTCCACTATGATCA	0.0894626	3.1615	0.0410392	0.0476165		0.532251	0.0150614	-0.909822	-6.053	0.411506	113374	0.447936	0.273656	-3.48141	0.348784
1212	AGO3	HGLibA_01212	TCTTCTGGGCACCATGAGTA	2.37076	4.76904	0.0410392	0.0952331		0.0401699	0.019969	-4.63774	-5.64609	0.10003	69673	0.177181	0.0300694	-5.14192	0.751582
1213	AGO4	HGLibA_01213	GTTAACATACGTTTGATGAC	3.66797	7.23394	0.164157	0.0952331		0.0259634	0.0131648	-5.26737	-6.24718	0.0963541	68530	0.173517	0.0195641	-5.75728	0.760657
1214	AGO4	HGLibA_01214	CCAGCACCAATGCTGCAATA	1.47613	4.2332	0.0820784	0.0476165		0.0322576	0.0112484	-4.95422	-6.47414	0.180329	88558	0.2513	0.021753	-5.71418	0.599808
1215	AGO4	HGLibA_01215	GTCTAGTCACATTACAAACT	3.39958	5.84074	0.164157	0.0952331		0.0280132	0.016305	-5.15775	-5.93854	0.0666367	58107	0.141527	0.0221591	-5.54815	0.849161
1216	AGPAT1	HGLibA_01216	CTCGACGTTGCGTCCTCGCA	26.5704	55.7817	0.861824	0.619015		0.0232972	0.0110971	-5.4237	-6.49367	0.109468	72345	0.186739	0.0171971	-5.95869	0.728766
1217	AGPAT1	HGLibA_01217	TTGCCAAGCGCGAGCTACTG	2.32603	4.50112	0.0820784	0.0476165		0.0204712	0.0105788	-5.61026	-6.56268	0.0912831	66983	0.168182	0.015525	-6.08647	0.77422
1218	AGPAT1	HGLibA_01218	TCCCGTACAGGTATTTGATG	10.9592	8.14488	0.0410392	0.190466		0.0173796	0.0233848	-5.84646	-5.41829	0.0215805	33912	0.0785346	0.0203822	-5.63237	1.10494
1219	AGPAT2	HGLibA_01219	GCGATCTGCACGCAGCGCTC	7.82798	8.14488	0.205196	0.0952331		0.0121657	0.0116924	-6.36103	-6.41829	0.00045778	4416	0.0127933	0.0119291	-6.38966	1.89302
1220	AGPAT2	HGLibA_01220	TGGCAGGTGTCCACGAGCGC	3.57851	3.64376	0.123118	0.190466		0.0532251	0.0522718	-4.23175	-4.25782	0.000184204	2366	0.00960812	0.0527484	-4.24479	2.01736
1221	AGPAT2	HGLibA_01221	ATTGTCGTTGCGAGTACCCT	10.6908	18.5939	0.205196	0.190466		0.0178159	0.0102435	-5.81069	-6.60915	0.0673654	58410	0.142332	0.0140297	-6.20992	0.846697
1222	AGPAT3	HGLibA_01222	GACCAAGCACCGCGTTAGCA	4.16001	7.82337	0.123118	0.0476165		0.0114462	0.00608644	-6.44898	-7.36018	0.0842371	64631	0.160848	0.00876635	-6.90458	0.793583
1223	AGPAT3	HGLibA_01223	AGTACCACGTCCAGCCGATG	10.9592	11.8958	0.205196	0.238083		0.0217245	0.020014	-5.52453	-5.64285	0.0017442	9485	0.0226941	0.0208692	-5.58369	1.64409
1224	AGPAT3	HGLibA_01224	CAGGCCACGGTAGAGCGCTT	17.3558	14.2	0.328314	0.333316		0.0192049	0.023473	-5.70238	-5.41285	0.0102739	23346	0.0543094	0.021339	-5.55762	1.26513
1225	AGPAT4	HGLibA_01225	CCGCGCGCCTACCTCAAGTA	15.1192	12.3245	0.287275	0.238083		0.0157471	0.0193178	-5.98877	-5.69392	0.0106109	23721	0.0552041	0.0175325	-5.84135	1.25803
1226	AGPAT4	HGLibA_01226	TCACCTGTTGCCACGAACCA	6.79916	2.41131	0.0820784	0.0476165		0.0070033	0.0197471	-7.15775	-5.66221	0.17437	87469	0.24602	0.0133752	-6.40998	0.609029
1227	AGPAT4	HGLibA_01227	GGCCCTGGACCCTCGTGAAC	0.134194	0.214339	0.0410392	0.0476165		0.354834	0.222155	-1.49478	-2.17036	0.0838777	64492	0.160507	0.288494	-1.83257	0.794506
1228	AGPAT5	HGLibA_01228	GTGCGCTACGTGCTGAAAGA	6.93335	9.21658	0.0410392	0.190466		0.027471	0.0206656	-5.18595	-5.59662	0.020042	32764	0.0754917	0.0240683	-5.39129	1.1221
1229	AGPAT5	HGLibA_01229	AAACAAGTTGCAGAGCTACG	3.62324	3.10792	0.0820784	0.0952331		0.026284	0.0306421	-5.24967	-5.02834	0.00612969	18011	0.0420005	0.028463	-5.13901	1.37675
1230	AGPAT5	HGLibA_01230	CATCTCTTTCTCGTTAAATT	0.178925	0.375093	0.0820784	0.0476165		0.266125	0.126946	-1.90982	-2.97771	0.166854	85986	0.239477	0.196536	-2.44377	0.620736
1231	AGPAT6	HGLibA_01231	CCCCATCTTACCGTTGGTGT	10.9592	9.80601	0.205196	0.238083		0.0217245	0.0242793	-5.52453	-5.36413	0.00320709	12921	0.0306316	0.0230019	-5.44433	1.51383
1232	AGPAT6	HGLibA_01232	TCAGCGCTCGCACGCAGATC	17.9373	21.2196	0.164157	0.190466		0.0106185	0.00897597	-6.55728	-6.79972	0.00708015	19313	0.0452425	0.00979722	-6.6785	1.34445
1233	AGPAT6	HGLibA_01233	TGAGCCGAAGGCTGATGTAC	30.6857	10.9313	0.369353	0.666632		0.0217245	0.0609838	-5.52453	-4.03543	0.176344	87811	0.247836	0.0413542	-4.77998	0.605835
1234	AGPAT9	HGLibA_01234	GCTGGTTATAGGAACTACAC	3.66797	3.48301	0.0410392	0.0952331		0.0259634	0.0273422	-5.26737	-5.19273	0.000754066	5898	0.0157782	0.0266528	-5.23005	1.80194
1235	AGPAT9	HGLibA_01235	ACTGATCCCAATGAAAGCCA	5.59141	4.34037	0.0820784	0.14285		0.025548	0.0329119	-5.29064	-4.92525	0.0162454	29445	0.0680884	0.02923	-5.10795	1.16693
1236	AGPAT9	HGLibA_01236	CAACACAAATGCCTCCCTTC	2.59442	6.323	0.123118	0.0476165		0.0183535	0.00753069	-5.7678	-7.053	0.143636	81034	0.218751	0.0129421	-6.4104	0.66005
1237	AGPHD1	HGLibA_01237	ATCATGTTTCTGAAAGCCGC	3.89162	4.39395	0.0820784	0.0476165		0.0122356	0.0108368	-6.35277	-6.52791	0.00378961	14059	0.0332655	0.0115362	-6.44034	1.47801
1238	AGPHD1	HGLibA_01238	CTACTTTCAGGTATCAATCA	2.81807	4.66187	0.0410392	0.0476165		0.0168968	0.010214	-5.8871	-6.6133	0.0569638	54133	0.129865	0.0135554	-6.2502	0.886509
1239	AGPHD1	HGLibA_01239	CGATGAAGACTACTTAACTT	5.63615	1.12528	0.0820784	0.0952331		0.0168968	0.0846306	-5.8871	-3.56268	0.281814	103181	0.337067	0.0507637	-4.72489	0.472283
1240	AGPS	HGLibA_01240	TACCTTAGGTACCCTCTTAG	1.38667	8.30564	0.123118	0.190466		0.137355	0.0229322	-2.86402	-5.44648	0.308053	105684	0.359724	0.0801436	-4.15525	0.44403
1241	AGPS	HGLibA_01241	CTTGGCCATAAAACTATATC	10.7802	6.69809	0.123118	0.285699		0.0265021	0.0426538	-5.23775	-4.55118	0.052788	52272	0.124629	0.034578	-4.89447	0.90438
1242	AGPS	HGLibA_01242	GATCGAGTATTTAGAGCTCA	0.760432	2.51848	0.0410392	0.0476165		0.0626177	0.0189068	-3.99729	-5.72495	0.211243	93825	0.277854	0.0407623	-4.86112	0.556183
1243	AGR2	HGLibA_01243	CTTGATGATTATTCATCACT	9.48304	7.07319	0.205196	0.285699		0.0301274	0.0403919	-5.05278	-4.62979	0.0217924	34061	0.0789591	0.0352596	-4.84129	1.1026
1244	AGR2	HGLibA_01244	GGAAACTTACAACCAGATTG	1.4314	0.696602	0.0410392	0.0476165		0.0332657	0.0683555	-4.90982	-3.8708	0.109012	72237	0.186239	0.0508106	-4.39031	0.72993
1245	AGR2	HGLibA_01245	GACAAACACCTTTCTCCTGA	4.07055	1.17886	0.0410392	0.0476165		0.0116978	0.0403919	-6.41762	-4.62979	0.21624	94579	0.28216	0.0260448	-5.5237	0.549504
1246	AGR3	HGLibA_01246	GAGAGTATTGACAATCCTCC	3.04173	4.87621	0.123118	0.190466		0.0626177	0.0390603	-3.99729	-4.67815	0.0536307	52670	0.125662	0.050839	-4.33772	0.900796
1247	AGR3	HGLibA_01247	GAGGATTGTCAATACTCTCA	0.984089	3.91169	0.0820784	0.0952331		0.0967728	0.0243458	-3.36925	-5.36018	0.248343	99117	0.309212	0.0605593	-4.36472	0.509743
1248	AGR3	HGLibA_01248	GATAAGAATTTATCACCTGA	2.19183	0.910941	0.0410392	0.0952331		0.043449	0.104544	-4.52453	-3.25782	0.146746	81724	0.2216	0.0739963	-3.89118	0.654431
1249	AGRN	HGLibA_01249	GAGGCGTCCGACCCACACAC	5.41249	7.28753	0.205196	0.0476165		0.00879753	0.00653398	-6.82869	-7.25782	0.0220978	34322	0.0794567	0.00766575	-7.04325	1.09987
1250	AGRN	HGLibA_01250	CCTTGTTGCCGCCGTCCAGC	11.8091	8.89507	0.246235	0.238083		0.020161	0.0267657	-5.63229	-5.22347	0.0201441	32833	0.0757166	0.0234633	-5.42788	1.12081
1251	AGRN	HGLibA_01251	ATGTCCCGCCGGCTCCGGGC	0.894626	1.82188	0.0410392	0.0952331		0.10645	0.0522718	-3.23175	-4.25782	0.108837	72183	0.186078	0.079361	-3.74479	0.730305
1252	AGRP	HGLibA_01252	CAGCCTTACGCAGCGACGTG	38.5137	37.5093	0.738706	0.857098		0.0222544	0.0228503	-5.48977	-5.45165	0.000184571	2370	0.00961102	0.0225523	-5.47071	2.01723
1253	AGRP	HGLibA_01253	GCTCCTCACGTCGCTGCGTA	3.04173	8.68073	0.0820784	0.380932		0.125235	0.0438825	-2.99729	-4.51021	0.184334	89248	0.254895	0.084559	-3.75375	0.593638
1254	AGRP	HGLibA_01254	GCCCATCTGGGCTCCTCGCG	3.7127	3.96527	0.0410392	0.14285		0.0384759	0.0360252	-4.6999	-4.79485	0.00131785	8119	0.0200316	0.0372506	-4.74738	1.69828
1255	AGT	HGLibA_01255	GGCCAGCATCCCGACCATTG	5.05464	4.17961	0.0820784	0.0476165		0.00942036	0.0113926	-6.73	-6.45576	0.00912479	21910	0.0513966	0.0104065	-6.59288	1.28907
1256	AGT	HGLibA_01256	TTGCAGCGACTAGCACCAGC	5.18883	7.34111	0.0820784	0.14285		0.0275302	0.0194589	-5.18284	-5.68343	0.0292801	39340	0.0918526	0.0234945	-5.43314	1.03691
1257	AGT	HGLibA_01257	GAGTCACCGAGAAGTTGTCC	0.134194	5.78715	0.123118	0.0476165		0.354834	0.00822797	-1.49478	-6.92525	0.416092	113730	0.451511	0.181531	-4.21002	0.345332
1258	AGTPBP1	HGLibA_01258	TCCTACGATCCTAGAATTAT	16.64	15.7539	0.246235	0.285699		0.0171694	0.0181351	-5.86402	-5.78507	0.000774113	6003	0.0159144	0.0176522	-5.82454	1.79821
1259	AGTPBP1	HGLibA_01259	CAATATTTGTGAACCACCTT	9.5725	6.05508	0.0820784	0.190466		0.0198972	0.0314556	-5.65129	-4.99054	0.0487179	50360	0.119387	0.0256764	-5.32091	0.923043
1260	AGTPBP1	HGLibA_01260	GCTGTGAATTCAGTATCCTT	2.54968	2.35773	0.0410392	0.0476165		0.0186755	0.0201959	-5.74271	-5.62979	0.00158492	9004	0.0217233	0.0194357	-5.68625	1.66307
1261	AGTR1	HGLibA_01261	CTACAAGCATTGTGCGTCGA	9.75143	4.44753	0.164157	0.14285		0.0146491	0.0321188	-6.09304	-4.96044	0.120074	75348	0.196668	0.023384	-5.52674	0.706267
1262	AGTR1	HGLibA_01262	TCTCAGCATTGATCGATACC	24.7811	20.0407	0.410392	0.238083		0.00960741	0.01188	-6.70164	-6.39533	0.0113359	24573	0.0569315	0.0107437	-6.54848	1.24465
1263	AGTR1	HGLibA_01263	TCAGGCCCAGCCCTATCGGG	1.96818	0.160754	0.0820784	0.0476165		0.0241932	0.296207	-5.36925	-1.75532	0.383986	111515	0.424948	0.1602	-3.56229	0.371664
1264	AGTR2	HGLibA_01264	AAGCCCGAAGTGAAGACCGC	6.84389	6.69809	0.0410392	0.238083		0.0347876	0.0355448	-4.84528	-4.81422	0.000341391	3675	0.0114643	0.0351662	-4.82975	1.94065
1265	AGTR2	HGLibA_01265	TTACTGAAGACGAATAGCTA	17.0874	11.6279	0.246235	0.476165		0.0278665	0.0409503	-5.16532	-4.60998	0.0360562	43626	0.101997	0.0344084	-4.88765	0.991411
1266	AGTR2	HGLibA_01266	TTCGGGCTTGTGAACATCTC	23.305	9.75243	0.205196	0.285699		0.0122591	0.0292952	-6.35	-5.09319	0.138179	79676	0.214027	0.0207772	-5.7216	0.669531
1267	AGTRAP	HGLibA_01267	AACTTCGAAGTGCAGCGCAC	0.894626	1.60754	0.0410392	0.0476165		0.0532251	0.0296207	-4.23175	-5.07725	0.0772802	62115	0.153542	0.0414229	-4.6545	0.813774
1268	AGTRAP	HGLibA_01268	CACCATGCTTATGGCGTCGA	29.3437	18.7547	0.328314	0.523782		0.0178499	0.0279281	-5.80794	-5.16214	0.0467533	49346	0.116927	0.022889	-5.48504	0.932086
1269	AGTRAP	HGLibA_01269	CTCCATCGACGCCATAAGCA	1.87872	5.30489	0.0410392	0.14285		0.0760358	0.0269279	-3.71718	-5.21475	0.177892	88135	0.249093	0.0514819	-4.46597	0.603639
1270	AGXT	HGLibA_01270	TCCTGGTCTGGAACACGTAC	2.81807	4.60829	0.0410392	0.0476165		0.0168968	0.0103328	-5.8871	-6.59662	0.0546875	53130	0.127029	0.0136148	-6.24186	0.896098
1271	AGXT	HGLibA_01271	TATGCGCTCCCCGATGTCCA	10.5566	9.8596	0.164157	0.190466		0.0180424	0.0193178	-5.79247	-5.69392	0.00120659	7717	0.019296	0.0186801	-5.74319	1.71453
1272	AGXT	HGLibA_01272	CCGAGTGCACCCGATGACCA	3.62324	3.8581	0.451431	0.238083		0.0657099	0.0617098	-3.92774	-4.01836	0.00217546	10589	0.0253542	0.0637099	-3.97305	1.59595
1273	AGXT2	HGLibA_01273	AGACGGTGCTTGTATGCCAC	3.26539	6.53734	0.0820784	0.0952331		0.0291644	0.0145676	-5.09965	-6.1011	0.0987357	69274	0.175897	0.021866	-5.60037	0.754742
1274	AGXT2	HGLibA_01274	TATGTTGTTTGAGTGCGCCC	1.96818	0.803771	0.0410392	0.0952331		0.0483864	0.118483	-4.36925	-3.07725	0.152176	82874	0.226611	0.0834346	-3.72325	0.644719
1275	AGXT2	HGLibA_01275	AGGATACTCACGGGTGGCAA	5.72561	6.43017	0.0820784	0.0952331		0.0166328	0.0148103	-5.90982	-6.07725	0.00344303	13393	0.0317261	0.0157216	-5.99354	1.49858
1276	AGXT2L1	HGLibA_01276	CAACGACTTAGCCTTACGCC	34.3089	28.8822	0.369353	0.999947		0.0291454	0.0346216	-5.10059	-4.85218	0.00771911	20084	0.047432	0.0318835	-4.97639	1.32393
1277	AGXT2L1	HGLibA_01277	CATACTCAACAATGTTGTCG	12.3011	7.66262	0.205196	0.333316		0.0270964	0.0434989	-5.20576	-4.52288	0.052601	52178	0.124411	0.0352977	-4.86432	0.90514
1278	AGXT2L1	HGLibA_01278	GGTCAAGAGTGATCACATCC	9.21465	6.64451	0.287275	0.238083		0.0258374	0.0358315	-5.27439	-4.80263	0.0269724	37744	0.0881914	0.0308344	-5.03851	1.05457
1279	AGXT2L2	HGLibA_01279	GCAGTACATGTACGATGAAC	7.24647	12.4852	0.123118	0.14285		0.019713	0.0114415	-5.66471	-6.44958	0.0654049	57632	0.140056	0.0155772	-6.05715	0.8537
1280	AGXT2L2	HGLibA_01280	CATCGTACATGTACTGCCCT	88.6575	74.59	1.23118	1.99989		0.0225575	0.0268118	-5.47025	-5.22099	0.00766275	20019	0.0472385	0.0246847	-5.34562	1.3257
1281	AGXT2L2	HGLibA_01281	GAGGCTGGCTCGCCACTACA	11.8985	5.84074	0.164157	0.238083		0.0200094	0.0407624	-5.64318	-4.61662	0.103496	70682	0.180705	0.0303859	-5.1299	0.743031
1282	AHCTF1	HGLibA_01282	CAAAATGAAGTTGAAGCATC	2.63915	1.23245	0.0820784	0.0476165		0.0180424	0.0386357	-5.79247	-4.69392	0.117088	74523	0.193899	0.028339	-5.24319	0.712424
1283	AHCTF1	HGLibA_01283	CCTTCTTGTTGACCTATGTT	24.7364	17.5758	0.369353	0.238083		0.00962478	0.0135461	-6.69903	-6.20598	0.0282465	38638	0.0902202	0.0115854	-6.45251	1.0447
1284	AHCTF1	HGLibA_01284	TTAAGAGCTCAAGTGACTAG	6.48604	6.26942	0.0820784	0.14285		0.0220242	0.0227852	-5.50477	-5.45576	0.00032223	3530	0.0112653	0.0224047	-5.48027	1.94826
1285	AHCY	HGLibA_01285	ACCGCTCCCGCATACGCATC	24.2891	16.5577	0.287275	0.190466		0.00784163	0.0115032	-6.99463	-6.44182	0.0347823	42866	0.100138	0.00967241	-6.71823	0.9994
1286	AHCY	HGLibA_01286	TGCCGGGCCTGATGCGTATG	12.1669	34.7765	0.410392	0.380932		0.0313089	0.0109537	-4.99729	-6.51243	0.178003	88149	0.249208	0.0211313	-5.75486	0.603437
1287	AHCY	HGLibA_01287	CAACGAGAACGCCGTGGAGA	3.17592	1.44679	0.0410392	0.0952331		0.0299859	0.0658238	-5.05957	-3.92525	0.122057	75828	0.198649	0.0479049	-4.49241	0.701915
1288	AHCYL1	HGLibA_01288	CGCCGAGAAGTACTCCTTCA	9.66196	8.7879	0.205196	0.285699		0.0295695	0.0325105	-5.07975	-4.94295	0.00238034	11119	0.0264197	0.03104	-5.01135	1.57807
1289	AHCYL1	HGLibA_01289	CGTCACCAAGGCGCCCAAGA	2.1471	2.03622	0.0410392	0.0476165		0.0221771	0.0233848	-5.49478	-5.41829	0.000735078	5827	0.0155683	0.0227809	-5.45654	1.80776
1290	AHCYL1	HGLibA_01290	TCGAGCGAGACAAAGATCTT	1.20775	4.98338	0.0820784	0.190466		0.157704	0.0382203	-2.66471	-4.70952	0.257644	100325	0.316931	0.0979621	-3.68711	0.499035
1291	AHCYL2	HGLibA_01291	CGCCTCGGTGACGGTGCCGT	7.2912	16.0218	0.246235	0.0952331		0.0130614	0.00594395	-6.25855	-7.39436	0.119201	75076	0.195945	0.00950266	-6.82646	0.707866
1292	AHCYL2	HGLibA_01292	TCCTAGTTGCGACTCCGCCT	64.1447	19.7728	1.06702	0.666632		0.0103926	0.0337146	-6.5883	-4.89048	0.205211	92903	0.272599	0.0220536	-5.73939	0.564476
1293	AHCYL2	HGLibA_01293	GTGTGTGCAACCCACGATTT	8.99099	2.94716	0.0820784	0.0476165		0.00529603	0.0161567	-7.56087	-5.95172	0.189942	90350	0.259446	0.0107264	-6.7563	0.585952
1294	AHDC1	HGLibA_01294	AGTGCGCCGCAAGGCGTACT	0.760432	3.42942	0.0820784	0.0476165		0.0626177	0.0138847	-3.99729	-6.17036	0.267628	101427	0.325636	0.0382512	-5.08382	0.487267
1295	AHDC1	HGLibA_01295	GGCCAAGATCCCCGTATCGC	2.2813	3.64376	0.0820784	0.0952331		0.0417451	0.0261359	-4.58225	-5.25782	0.0518621	51819	0.123514	0.0339405	-4.92004	0.908285
1296	AHDC1	HGLibA_01296	CGAGCCACCATCGCCCGAGC	8.18583	3.75093	0.123118	0.190466		0.0232678	0.0507783	-5.42552	-4.29964	0.119971	75321	0.196569	0.0370231	-4.86258	0.706485
1297	AHI1	HGLibA_01297	CACTGCTTAGTTTGTCATCA	9.84089	8.03771	0.0820784	0.238083		0.0241932	0.0296207	-5.36925	-5.07725	0.0104589	23567	0.0547693	0.026907	-5.22325	1.26146
1298	AHI1	HGLibA_01298	CATGTGGTTGATGAGCATAC	20.4422	14.0928	0.205196	0.285699		0.0139759	0.0202727	-6.16091	-5.62432	0.0330737	41878	0.0974654	0.0171243	-5.89261	1.01115
1299	AHI1	HGLibA_01299	AATAACAAGCCGAGATAGCC	3.80216	0.535848	0.246235	0.14285		0.0375706	0.266586	-4.73425	-1.90733	0.350388	109202	0.395979	0.152078	-3.32079	0.402327
1300	AHNAK	HGLibA_01300	AGACCTTCGACGTGAATCGC	68.9757	35.6339	0.984941	1.4285		0.0207101	0.0400882	-5.59352	-4.64068	0.0920041	67197	0.168971	0.0303992	-5.1171	0.772189
1301	AHNAK	HGLibA_01301	TTGCCAGCGATTCACGTCGA	11.5854	19.4513	0.164157	0.0952331		0.00822009	0.00489598	-6.92663	-7.67419	0.0595477	55254	0.133001	0.00655803	-7.30041	0.876145
1302	AHNAK	HGLibA_01302	GCTGAAGACTTCACGGGTCC	1.65506	0.803771	0.0820784	0.0952331		0.0575406	0.118483	-4.11928	-3.07725	0.115601	74066	0.192618	0.0880117	-3.59826	0.715303
1303	AHNAK2	HGLibA_01303	CGGATGAGGGCATTCGACCA	9.75143	4.39395	0.0820784	0.238083		0.0244152	0.0541842	-5.35608	-4.20598	0.123141	76143	0.199584	0.0392997	-4.78103	0.699873
1304	AHNAK2	HGLibA_01304	GGTCGAATGCCCTCATCCGC	4.02582	0.482263	0.0410392	0.0476165		0.0118278	0.0987357	-6.40168	-3.34028	0.338577	108195	0.386192	0.0552817	-4.87098	0.413196
1305	AHNAK2	HGLibA_01305	TTTCAGGATGAGTCGTCCAG	5.68088	4.2332	0.0820784	0.0952331		0.0167638	0.0224967	-5.89851	-5.47414	0.021401	33766	0.0782183	0.0196303	-5.68632	1.10669
1306	AHR	HGLibA_01306	AAGTCGGTCTCTATGCCGCT	1.4314	0.910941	0.0410392	0.0476165		0.0332657	0.0522718	-4.90982	-4.25782	0.04942	50667	0.120374	0.0427687	-4.58382	0.919469
1307	AHR	HGLibA_01307	TTGCTGCTCTACAGTTATCC	9.48304	15.0573	0.164157	0.333316		0.0351486	0.0221365	-4.83039	-5.49743	0.0498165	50869	0.120858	0.0286425	-5.16391	0.917726
1308	AHR	HGLibA_01308	AATTTCAGCGTCAGCTACAC	0.715701	1.71471	0.0410392	0.0952331		0.133063	0.0555388	-2.90982	-4.17036	0.148858	82163	0.223588	0.0943007	-3.54009	0.650551
1309	AHRR	HGLibA_01309	CCCGCGTACGTGCACTCCCC	26.0336	21.4875	0.451431	0.285699		0.0109742	0.0132961	-6.50974	-6.23286	0.00932311	22148	0.0519494	0.0121352	-6.3713	1.28442
1310	AHRR	HGLibA_01310	TTATGCATCAGCAACGATCG	29.9252	36.3841	0.492471	0.571398		0.0190942	0.0157046	-5.71072	-5.99267	0.00965918	22566	0.052825	0.0173994	-5.85169	1.27716
1311	AHRR	HGLibA_01311	GGGAGTGCACGTACGCGGGC	1.29721	0.696602	0.0410392	0.0952331		0.0734139	0.136711	-3.7678	-2.8708	0.0912068	66954	0.168114	0.105062	-3.3193	0.774395
1312	AHSA1	HGLibA_01312	TGAGCCTGACACAAATCTCG	4.38367	3.10792	0.0820784	0.0952331		0.0217245	0.0306421	-5.52453	-5.02834	0.0291037	39182	0.0916676	0.0261833	-5.27644	1.03778
1313	AHSA1	HGLibA_01313	AGACGTTGCCATCTACCATG	9.30411	18.0581	0.205196	0.333316		0.0358246	0.018458	-4.80291	-5.75961	0.0920551	67218	0.169012	0.0271413	-5.28126	0.772084
1314	AHSA1	HGLibA_01314	GCATCCATTAACAATCGCAA	1.34194	0.964526	0.0410392	0.0476165		0.0354834	0.0493678	-4.81671	-4.34028	0.0277672	38299	0.0894742	0.0424256	-4.5785	1.0483
1315	AHSA2	HGLibA_01315	CTGCAGCTGACCCCCCTAAA	2.2813	1.55396	0.0820784	0.0476165		0.0208726	0.0306421	-5.58225	-5.02834	0.0365119	43880	0.102688	0.0257573	-5.30529	0.988478
1316	AHSA2	HGLibA_01316	AATTCTGTTTGCCCTAGAGT	0.939358	1.01811	0.0820784	0.0952331		0.101381	0.093539	-3.30214	-3.41829	0.00200567	10178	0.0243193	0.0974601	-3.36021	1.61405
1317	AHSA2	HGLibA_01317	GTATAGCATCTTCACTGTAA	1.92345	1.33962	0.0410392	0.0952331		0.0495117	0.0710897	-4.33609	-3.81422	0.0334116	42112	0.097914	0.0603007	-4.07515	1.00916
1318	AHSG	HGLibA_01318	GGTTGTCTATAAATCAGCCC	1.25248	5.89432	0.0410392	0.0476165		0.0380179	0.00807837	-4.71718	-6.95172	0.267754	101441	0.325744	0.0230481	-5.83445	0.487124
1319	AHSG	HGLibA_01319	CTCACGCTGCATCTTGCCAC	3.80216	0.964526	0.0820784	0.0476165		0.0125235	0.0493678	-6.31921	-4.34028	0.243875	98494	0.30557	0.0309457	-5.32975	0.514889
1320	AHSG	HGLibA_01320	ACACCTTTACTTCATCAATC	6.35185	0.696602	0.205196	0.0952331		0.014993	0.136711	-6.05957	-2.8708	0.355204	109517	0.400267	0.0758519	-4.46518	0.39765
1321	AHSP	HGLibA_01321	AATAAGGATCTCATTTCCGC	2.95227	2.35773	0.0410392	0.0476165		0.0161288	0.0201959	-5.95422	-5.62979	0.0127203	26040	0.0602854	0.0181624	-5.792	1.21979
1322	AHSP	HGLibA_01322	ACTTCTACATCAACTATTAC	0.0447313	0.0535848	0.0410392	0.0476165		1.0645	0.888621	0.0901775	-0.17036	0.473465	117287	0.498186	0.976561	-0.0400912	0.302608
1323	AHSP	HGLibA_01323	TCGGCAAGAGCTGAACACTC	20.6659	26.4173	0.574549	33.3792		1.61518	1.26354	0.691699	0.337467	0.731483	123329	0.73197	1.43936	0.514583	0.135507
1324	AICDA	HGLibA_01324	ACGAGACGCATTTCGTACTT	10.7355	14.7358	0.0820784	0.14285		0.0133063	0.00969405	-6.23175	-6.68869	0.0242042	35843	0.0833375	0.0115002	-6.46022	1.07916
1325	AICDA	HGLibA_01325	CGCGCGCCTCTACTTCTGTG	4.11528	6.43017	0.0820784	0.190466		0.0462827	0.0296207	-4.43338	-5.07725	0.0473072	49622	0.117654	0.0379517	-4.75532	0.929393
1326	AICDA	HGLibA_01326	GCCGCTGCTACCGCGTCACC	39.2294	18.5403	0.369353	0.333316		0.00849659	0.0179779	-6.8789	-5.79763	0.110142	72540	0.187383	0.0132372	-6.33827	0.72727
1327	AIDA	HGLibA_01327	ATGTTCAGCCTGTCCCATTA	19.4134	6.96602	0.205196	0.0952331		0.00490554	0.0136711	-7.67137	-6.19273	0.17116	86774	0.243426	0.00928831	-6.93205	0.613632
1328	AIDA	HGLibA_01328	TACTTGGTTCTAGCTTCTTC	4.78625	6.10866	0.0410392	0.14285		0.0298458	0.0233848	-5.06633	-5.41829	0.0149895	28295	0.0653779	0.0266153	-5.24231	1.18457
1329	AIDA	HGLibA_01329	TGAATTCACAGAAGAACAAA	0.0447313	0.428678	0.0410392	0.0476165		1.0645	0.111078	0.0901775	-3.17036	0.421898	115138	0.452213	0.587789	-1.54009	0.344657
1330	AIF1	HGLibA_01330	CATGTCCCTGAAACGAATGC	6.53077	10.6098	0.0820784	0.285699		0.0437466	0.0269279	-4.51468	-5.21475	0.0544891	53051	0.126756	0.0353373	-4.86472	0.89703
1331	AIF1	HGLibA_01331	GAACGTCTCCCCGGAGCCAC	8.40949	3.80452	0.287275	0.14285		0.0169867	0.0375474	-5.87945	-4.73514	0.124868	76539	0.201336	0.027267	-5.3073	0.696079
1332	AIF1	HGLibA_01332	TACATGGAGTTTGACCTTAA	10.6461	9.96677	0.246235	0.238083		0.0223635	0.0238877	-5.48271	-5.38759	0.00113712	7473	0.0187787	0.0231256	-5.43515	1.72633
1333	AIF1L	HGLibA_01333	GGGGCTTACCCGGTTGATCT	0.0447313	0.0535848	0.0410392	0.0476165		1.0645	0.888621	0.0901775	-0.17036	0.473465	117288	0.498182	0.976561	-0.0400912	0.302612
1334	AIF1L	HGLibA_01334	CTGAACAATGAAGGCGAGAT	16.7295	6.75168	0.205196	0.238083		0.0142313	0.0352627	-6.13479	-4.82571	0.147248	81822	0.222092	0.024747	-5.48025	0.653467
1335	AIF1L	HGLibA_01335	CAATCTCGCCTTCATTGTTC	16.64	4.12603	0.164157	0.238083		0.0143078	0.0577027	-6.12705	-4.11522	0.245213	98665	0.306715	0.0360052	-5.12114	0.513265
1336	AIFM1	HGLibA_01336	AATGCTATTGTGCAATCCGT	8.99099	12.4317	0.164157	0.14285		0.0158881	0.0114908	-5.97591	-6.44338	0.025539	36733	0.0858028	0.0136894	-6.20965	1.0665
1337	AIFM1	HGLibA_01337	GACAGTAGTTTGCCCACAGT	6.48604	9.10941	0.246235	0.0476165		0.00734139	0.00522718	-7.08973	-7.57975	0.0283121	38680	0.0903317	0.00628428	-7.33474	1.04416
1338	AIFM1	HGLibA_01338	ACCATGGAAAAAGTCAGACG	3.89162	0.589432	0.0820784	0.0952331		0.0244713	0.161567	-5.35277	-2.62979	0.322321	106887	0.372149	0.0930194	-3.99128	0.429283
1339	AIFM2	HGLibA_01339	CCACGATGAACCGTGAGCGC	23.5287	12.646	0.53351	0.333316		0.0141664	0.0263574	-6.14139	-5.24565	0.0833271	64287	0.159962	0.0202619	-5.69352	0.795983
1340	AIFM2	HGLibA_01340	AAACCTCATTAAACTTGCCC	0.984089	0.428678	0.0410392	0.0476165		0.0483864	0.111078	-4.36925	-3.17036	0.139955	80151	0.215494	0.079732	-3.76981	0.666566
1341	AIFM2	HGLibA_01341	TCCCCACTACTAGCCCCTGC	4.87571	4.50112	0.164157	0.190466		0.0390643	0.0423153	-4.67801	-4.56268	0.00172785	9449	0.022567	0.0406898	-4.62034	1.64653
1342	AIFM3	HGLibA_01342	CTAGCGTGCACAGGACGATC	23.9313	16.4505	0.246235	0.333316		0.0139281	0.0202617	-6.16586	-5.6251	0.0335607	42193	0.0981623	0.0170949	-5.89548	1.00806
1343	AIFM3	HGLibA_01343	TCGTCCTGTGCACGCTAGAC	38.6479	34.0799	3.52937	3.76171		0.0973329	0.110379	-3.36093	-3.17946	0.00485013	15990	0.0374334	0.103856	-3.2702	1.42674
1344	AIFM3	HGLibA_01344	GAACCCACTGGCCATTCTCG	2.997	5.67998	0.123118	0.0952331		0.0317762	0.0167664	-4.97591	-5.89828	0.0876002	65767	0.164381	0.0242713	-5.4371	0.784149
1345	AIG1	HGLibA_01345	GATGATATACCCGAAGCTGC	1.69979	3.80452	0.123118	0.0952331		0.0560264	0.0250316	-4.15775	-5.32011	0.128667	77495	0.204903	0.040529	-4.73893	0.688452
1346	AIG1	HGLibA_01346	CATGTGGGTGTACCCTTTCC	21.65	16.3969	0.287275	0.333316		0.0153957	0.0203279	-6.02133	-5.62039	0.0191377	32011	0.0737809	0.0178618	-5.82086	1.13206
1347	AIG1	HGLibA_01347	ATCATACTCACAACCCCAAC	3.17592	2.03622	0.0410392	0.0476165		0.014993	0.0233848	-6.05957	-5.41829	0.04609	49049	0.115966	0.0191889	-5.73893	0.93567
1348	AIM1	HGLibA_01348	TCGACCTGCCCACGCCGAAA	15.4323	9.91318	0.246235	0.14285		0.00925653	0.0144101	-6.75531	-6.11678	0.045604	48795	0.115341	0.0118333	-6.43605	0.938018
1349	AIM1	HGLibA_01349	CGACGCGGTGTTCGACGACG	0.0447313	0.589432	0.0410392	0.0476165		1.0645	0.0807837	0.0901775	-3.62979	0.422108	115440	0.451254	0.572642	-1.76981	0.345579
1350	AIM1	HGLibA_01350	AATAAACTCAATCCCCGACC	2.19183	0.750187	0.0410392	0.0476165		0.0217245	0.0634729	-5.52453	-3.97771	0.186361	89649	0.256545	0.0425987	-4.75112	0.590836
1351	AIM2	HGLibA_01351	TTCAGCATCTAACACACGTG	15.7902	19.4513	0.246235	0.238083		0.0150779	0.01224	-6.05142	-6.35226	0.010914	24078	0.0559396	0.0136589	-6.20184	1.25228
1352	AIM2	HGLibA_01352	AGTACTGGGGGTTAGAAACG	0.0447313	0.10717	0.0410392	0.0476165		1.0645	0.44431	0.0901775	-1.17036	0.419831	113946	0.454705	0.754406	-0.540091	0.34227
1353	AIM2	HGLibA_01353	TTCACGTTTGAGACCCAAGA	3.08646	5.78715	0.0820784	0.0476165		0.0154276	0.00822797	-6.01835	-6.92525	0.0836197	64399	0.160245	0.0118278	-6.4718	0.795217
1354	AIMP1	HGLibA_01354	GCCAATAGATGTTTCCCGTC	9.16992	6.64451	0.205196	0.285699		0.0311561	0.0429978	-5.00434	-4.53959	0.0261277	37146	0.0868048	0.037077	-4.77197	1.06146
1355	AIMP1	HGLibA_01355	ACCATAGAATTAGCGTGCAG	5.90453	1.33962	0.0410392	0.0952331		0.0161288	0.0710897	-5.95422	-3.81422	0.259775	100564	0.318793	0.0436092	-4.88422	0.496491
1356	AIMP1	HGLibA_01356	TCCACTGCACGCTAATTCTA	3.04173	3.59018	0.164157	0.0952331		0.0313089	0.026526	-4.99729	-5.23645	0.00744026	19776	0.0464305	0.0289174	-5.11687	1.3332
1357	AIMP2	HGLibA_01357	GCCCCGCCAAGACTATCAGC	0.313119	1.12528	0.0410392	0.0952331		0.304143	0.0846306	-1.71718	-3.56268	0.250787	99455	0.311195	0.194387	-2.63993	0.506968
1358	AIMP2	HGLibA_01358	AAGTCGTGGGCTCATCCGCT	11.4959	12.9675	0.164157	0.238083		0.0207101	0.0183599	-5.59352	-5.7673	0.00372892	13947	0.0329956	0.019535	-5.68041	1.48154
1359	AIMP2	HGLibA_01359	ACGCAACCCTTATAGATAGC	0.760432	1.33962	0.123118	0.190466		0.250471	0.142179	-1.99729	-2.81422	0.0920578	67221	0.169009	0.196325	-2.40575	0.77209
1360	AIP	HGLibA_01360	GCAACCGGTTGTACCGCGAG	1.52086	0.696602	0.0410392	0.0476165		0.0313089	0.0683555	-4.99729	-3.8708	0.122894	76070	0.199375	0.0498322	-4.43404	0.700329
1361	AIP	HGLibA_01361	GCTCACCGTCGTACTTGTTG	4.69679	13.3962	0.205196	0.0476165		0.0101381	0.00355448	-6.62407	-8.13614	0.176815	87903	0.248238	0.0068463	-7.38011	0.605132
1362	AIP	HGLibA_01362	CGTCGTCACTGTGCAGCGTC	39.6319	72.5002	1.02598	0.714248		0.018022	0.00985167	-5.79409	-6.66542	0.0783765	62549	0.154639	0.0139369	-6.22976	0.81068
1363	AIPL1	HGLibA_01363	ATGCCCCGAGTGATTACCAG	2.10237	4.12603	0.0820784	0.190466		0.0905958	0.0461621	-3.46441	-4.43715	0.0989007	69325	0.176061	0.068379	-3.95078	0.754337
1364	AIPL1	HGLibA_01364	TGCACGAGGTGGCCGAGTTC	5.36776	7.76979	0.123118	0.190466		0.0354834	0.0245137	-4.81671	-5.35027	0.0333646	42077	0.0978577	0.0299985	-5.08349	1.00941
1365	AIPL1	HGLibA_01365	GTTTCCGATGATGATGTGCA	3.98109	4.76904	0.164157	0.0952331		0.0239214	0.019969	-5.38556	-5.64609	0.00856672	21124	0.0500487	0.0219452	-5.51582	1.30061
1366	AIRE	HGLibA_01366	GTGGCGGTACCAAAGCCTTG	0.67097	0.750187	0.0820784	0.0476165		0.0709667	0.0634729	-3.81671	-3.97771	0.00444472	15286	0.0358843	0.0672198	-3.89721	1.4451
1367	AIRE	HGLibA_01367	CCCCGCTCACCGTTCCCGAG	0.402582	2.30414	0.0410392	0.0476165		0.118278	0.0206656	-3.07975	-5.59662	0.302437	105189	0.354828	0.0694718	-4.33819	0.449982
1368	AIRE	HGLibA_01368	GCAGCCGGCCATAGCGCTCC	4.92044	3.05433	0.0410392	0.190466		0.0387091	0.0623594	-4.69118	-4.00325	0.0537805	52744	0.125836	0.0505342	-4.34722	0.900194
1369	AJAP1	HGLibA_01369	TCCGACGAGTGTTCCCGCTT	22.4551	12.4317	0.328314	0.428549		0.0190847	0.0344724	-5.71144	-4.85842	0.0764934	61842	0.152649	0.0267785	-5.28493	0.816306
1370	AJAP1	HGLibA_01370	CGTCGAGTGCAGCGTCTCAT	5.05464	8.57356	0.164157	0.0952331		0.0188407	0.0111078	-5.73	-6.49229	0.0628474	56556	0.137139	0.0149742	-6.11114	0.862837
1371	AJAP1	HGLibA_01371	GAGCAGCTATGACCATGATG	0.402582	0.10717	0.0410392	0.0476165		0.118278	0.44431	-3.07975	-1.17036	0.290188	104028	0.344257	0.281294	-2.12505	0.463117
1372	AJUBA	HGLibA_01372	TTTGAGGCGCCGCGCTACGA	7.69379	5.67998	0.0410392	0.0476165		0.00618896	0.00838322	-7.33609	-6.89828	0.0222149	34402	0.0796921	0.00728609	-7.11718	1.09858
1373	AJUBA	HGLibA_01373	CGGGCCGCTGAGCGTACAAT	1.87872	2.19698	0.0410392	0.0476165		0.0253453	0.0216737	-5.30214	-5.52791	0.00631423	18282	0.0426237	0.0235095	-5.41503	1.37035
1374	AJUBA	HGLibA_01374	GCCTTTGTTGCACTTGATAC	0.268388	0.803771	0.0410392	0.0476165		0.177417	0.0592414	-2.49478	-4.07725	0.207634	93275	0.274718	0.118329	-3.28602	0.561113
1375	AK1	HGLibA_01375	ATTGTCGTCCACACGCCCGC	26.5704	21.809	0.697667	0.666632		0.0250893	0.0305668	-5.31679	-5.03189	0.0101017	23094	0.053982	0.027828	-5.17434	1.26775
1376	AK1	HGLibA_01376	CTCCACGTTTCAAGAGCCGC	5.50195	9.64526	0.123118	0.14285		0.0259634	0.0148103	-5.26737	-6.07725	0.0695336	59243	0.144848	0.0203869	-5.67231	0.839089
1377	AK1	HGLibA_01377	AGTATTGACTTTGGCCACCA	4.69679	2.67924	0.0410392	0.0476165		0.0101381	0.0177724	-6.62407	-5.81422	0.0688302	59005	0.143961	0.0139553	-6.21914	0.841756
1378	AK2	HGLibA_01378	TTTACAGCTCGATGACCTCA	17.9373	14.843	0.205196	0.0952331		0.00530923	0.00641604	-7.55728	-7.2841	0.00896539	21678	0.0510392	0.00586263	-7.42069	1.2921
1379	AK2	HGLibA_01379	CTCTCTGTAGGCACCCAGAT	4.69679	4.82263	0.164157	0.0476165		0.0101381	0.00987357	-6.62407	-6.66221	0.000339394	3656	0.0114565	0.0100058	-6.64314	1.94095
1380	AK2	HGLibA_01380	GCTCACCTGGGTCCCTTTAC	4.11528	1.66113	0.0410392	0.14285		0.034712	0.0859956	-4.84842	-3.53959	0.150528	82522	0.225113	0.0603538	-4.19401	0.6476
1381	AK3	HGLibA_01381	CATCCAACAGCCAGCTATAC	14.2693	19.5049	0.246235	0.380932		0.026696	0.0195301	-5.22724	-5.67815	0.0240671	35742	0.0830996	0.023113	-5.45269	1.0804
1382	AK3	HGLibA_01382	AGATGATGTCATGACTCGGC	3.66797	3.96527	0.0820784	0.0476165		0.0129817	0.0120084	-6.26737	-6.37981	0.0015872	9008	0.0217448	0.0124951	-6.32359	1.66264
1383	AK3	HGLibA_01383	AACAACGCCTTACTGCTCGC	22.9024	25.9886	0.53351	0.380932		0.0166328	0.0146577	-5.90982	-6.0922	0.0041224	14700	0.0346088	0.0156452	-6.00101	1.46081
1384	AK4	HGLibA_01384	TAGGGTATTGATGACGTCAC	19.2792	27.5962	0.492471	0.476165		0.0246984	0.0172548	-5.33944	-5.85686	0.0312906	40712	0.0948516	0.0209766	-5.59815	1.02296
1385	AK4	HGLibA_01385	TATATTCTTACATGTACATG	9.08046	7.3947	0.205196	0.0952331		0.0104877	0.0128786	-6.57516	-6.27888	0.0107331	23875	0.05548	0.0116831	-6.42702	1.25586
1386	AK4	HGLibA_01386	CACTTGTATAATTCAATGAC	0.223657	2.83999	0.0410392	0.0476165		0.2129	0.0167664	-2.23175	-5.89828	0.373388	110819	0.415815	0.114833	-4.06502	0.3811
1387	AK5	HGLibA_01387	ACAGATCTGTACCCCCGATT	3.80216	1.92905	0.0410392	0.190466		0.0500942	0.0987357	-4.31921	-3.34028	0.0995999	69538	0.176763	0.0744149	-3.82975	0.75261
1388	AK5	HGLibA_01388	GTCTCTGATTAGCACAAGCC	3.22065	2.19698	0.123118	0.0476165		0.0147847	0.0216737	-6.07975	-5.52791	0.0362061	43724	0.102192	0.0182292	-5.80383	0.990584
1389	AK5	HGLibA_01389	GGTCCTCAAAAGATAGAGCC	0.0447313	0.428678	0.0820784	0.0476165		1.0645	0.111078	0.0901775	-3.17036	0.466673	117206	0.49138	0.587789	-1.54009	0.308583
1390	AK6	HGLibA_01390	GTGGGTGATTTAGCTCGAGA	0.313119	0.857356	0.0410392	0.0476165		0.152072	0.0555388	-2.71718	-4.17036	0.185197	89405	0.255639	0.103805	-3.44377	0.592373
1391	AK6	HGLibA_01391	TTGTCTTACAGGTACACCAG	12.659	14.5751	0.246235	0.238083		0.0188074	0.0163349	-5.73255	-5.93589	0.00509185	16368	0.0383914	0.0175712	-5.83422	1.41577
1392	AK6	HGLibA_01392	TGACCGGTGAGCAGGATGTT	1.16301	0.910941	0.0410392	0.0476165		0.0409424	0.0522718	-4.61026	-4.25782	0.0157522	28966	0.0671128	0.0466071	-4.43404	1.17319
1393	AK7	HGLibA_01393	GCAGCATACGTAGTTGCTGC	9.93035	11.2528	0.205196	0.333316		0.0335654	0.0296207	-4.89688	-5.07725	0.00411634	14686	0.0345909	0.031593	-4.98707	1.46104
1394	AK7	HGLibA_01394	TTGGGCGCGCTCCAAAGCCC	4.60733	5.19772	0.123118	0.14285		0.0310049	0.0274831	-5.01136	-5.18531	0.00381302	14112	0.0333453	0.029244	-5.09834	1.47697
1395	AK7	HGLibA_01395	CTCCAGTATGGAGCGGAAGG	0.0447313	0.214339	0.0410392	0.0476165		1.0645	0.222155	0.0901775	-2.17036	0.421112	114441	0.454119	0.643328	-1.04009	0.34283
1396	AK8	HGLibA_01396	GATACGGTGCGGGGCGATAG	7.51486	2.67924	0.205196	0.0476165		0.00633632	0.0177724	-7.30214	-5.81422	0.176252	87776	0.247806	0.0120544	-6.55818	0.605887
1397	AK8	HGLibA_01397	CCACATCTTCGAGTTGATGC	19.3239	15.8075	0.328314	0.285699		0.0147847	0.0180736	-6.07975	-5.78997	0.010221	23234	0.0542902	0.0164292	-5.93486	1.26528
1398	AK8	HGLibA_01398	TGGACCTAATATTACAATCC	6.12819	8.25205	0.0820784	0.333316		0.0543906	0.0403919	-4.2005	-4.62979	0.0226598	34709	0.0805689	0.0473912	-4.41515	1.09383
1399	AK9	HGLibA_01399	ATTAGCCCGTTACATAACAC	2.72861	8.94865	0.123118	0.190466		0.0698034	0.0212843	-3.84056	-5.55406	0.209253	93536	0.276087	0.0455438	-4.69731	0.558954
1400	AK9	HGLibA_01400	ATTGCTGCTGAAACCGAATC	1.69979	2.4649	0.0410392	0.0476165		0.0280132	0.0193178	-5.15775	-5.69392	0.0334779	42145	0.0980315	0.0236655	-5.42584	1.00863
1401	AK9	HGLibA_01401	TCCATGCCTGTGTTATGTAA	51.9331	20.3086	0.779745	0.761865		0.0146701	0.0375143	-6.09097	-4.73641	0.154895	83499	0.228933	0.0260922	-5.41369	0.640291
1402	AKAP1	HGLibA_01402	ACGGTCATCTGTGCCGCCCC	21.9631	17.7366	0.328314	0.380932		0.0173442	0.0214772	-5.8494	-5.54105	0.011549	24822	0.0574197	0.0194107	-5.69522	1.24094
1403	AKAP1	HGLibA_01403	CTACGAGGAGACCAACGAAG	2.2813	2.19698	0.0410392	0.0476165		0.0208726	0.0216737	-5.58225	-5.52791	0.00037104	3878	0.0118077	0.0212731	-5.55508	1.92783
1404	AKAP1	HGLibA_01404	AGAAGGTCGACCTCATCATC	16.1033	9.37733	0.246235	0.14285		0.00887084	0.0152335	-6.81671	-6.03661	0.0649477	57442	0.139537	0.0120522	-6.42666	0.855312
1405	AKAP10	HGLibA_01405	TGTCGTGCAAGACTTGTTCA	20.308	27.9177	0.53351	0.476165		0.0234472	0.0170561	-5.41444	-5.87357	0.0250059	36380	0.084827	0.0202516	-5.64401	1.07147
1406	AKAP10	HGLibA_01406	ACTTCGGCGAATGGAGCATT	6.7097	9.96677	0.205196	0.190466		0.0283867	0.0191101	-5.13864	-5.70952	0.0377702	44620	0.104466	0.0237484	-5.42408	0.981027
1407	AKAP10	HGLibA_01407	CACTGGTCAGCACTTCAATC	13.0168	8.0913	0.0410392	0.14285		0.0109742	0.0176547	-6.50974	-5.8238	0.0512144	51524	0.122669	0.0143145	-6.16677	0.911264
1408	AKAP11	HGLibA_01408	AAGCAGTGATCCTCTAAATC	0.939358	1.44679	0.0410392	0.0952331		0.101381	0.0658238	-3.30214	-3.92525	0.0477895	49907	0.118175	0.0836024	-3.61369	0.927475
1409	AKAP11	HGLibA_01409	CCAGTCTGTGTCATCCATAG	11.988	11.4671	0.164157	0.285699		0.0238321	0.0249146	-5.39095	-5.32686	0.000540073	4874	0.0136748	0.0243734	-5.35891	1.86408
1410	AKAP11	HGLibA_01410	CACCTACATCACCAAGACTT	7.82798	2.4649	0.123118	0.190466		0.0243315	0.0772714	-5.36103	-3.69392	0.203871	92716	0.271366	0.0508014	-4.52748	0.566444
1411	AKAP12	HGLibA_01411	GGGCGACACGGTCGTTAGTG	1.38667	5.30489	0.0820784	0.0476165		0.0343387	0.00897597	-4.86402	-6.79972	0.235986	97498	0.298707	0.0216574	-5.83187	0.524755
1412	AKAP12	HGLibA_01412	TGTCAAGCCGAAACCTTAGC	7.64905	7.28753	0.164157	0.0952331		0.0124503	0.013068	-6.32767	-6.25782	0.000628192	5336	0.0145288	0.0127591	-6.29275	1.83777
1413	AKAP12	HGLibA_01413	TTAGGGCTCCTTGACCGTTC	20.3527	13.0747	0.369353	0.285699		0.0140374	0.0218513	-6.15458	-5.51613	0.0459524	48987	0.115766	0.0179444	-5.83536	0.936418
1414	AKAP13	HGLibA_01414	TCCGAGTACTTGTACAGTGA	22.3657	14.0392	0.246235	0.285699		0.012774	0.0203501	-6.29064	-5.61882	0.0498795	50897	0.120944	0.0165621	-5.95473	0.917416
1415	AKAP13	HGLibA_01415	CTGCATCATACGCTTCATCC	7.11228	4.34037	0.123118	0.0952331		0.01339	0.0219413	-6.22271	-5.51021	0.0558348	53653	0.128429	0.0176656	-5.86646	0.891336
1416	AKAP13	HGLibA_01416	CCCCAATACATTCCACTCCG	6.66497	1.28603	0.123118	0.0952331		0.0142886	0.0740517	-6.12899	-3.75532	0.287128	103734	0.341592	0.0441702	-4.94216	0.466492
1417	AKAP14	HGLibA_01417	ACCACCAAGCATTAGTTCAC	18.5635	9.37733	0.451431	0.238083		0.0128253	0.0253892	-6.28486	-5.29964	0.0973695	68833	0.174574	0.0191072	-5.79225	0.75802
1418	AKAP14	HGLibA_01418	ACCAGCAGAGATTCGTGCTA	9.08046	5.09055	0.164157	0.0952331		0.0104877	0.0187078	-6.57516	-5.74022	0.0733436	60670	0.149191	0.0145978	-6.15769	0.826258
1419	AKAP14	HGLibA_01419	CCCGTAGCACGAATCTCTGC	8.23056	4.28678	0.0820784	0.14285		0.017356	0.0333233	-5.84842	-4.90733	0.08937	66404	0.166093	0.0253396	-5.37787	0.779649
1420	AKAP17A_X	HGLibA_01420	AGGACTCACCTTGATGTTGC	40.5713	67.1417	0.943902	1.04756		0.0258203	0.0156023	-5.27535	-6.0021	0.0577477	54465	0.130849	0.0207113	-5.63872	0.883229
1421	AKAP17A_X	HGLibA_01421	CATCGTGCACGACACGTCTG	87.8523	105.83	1.51845	2.19036		0.0249323	0.020697	-5.32584	-5.59443	0.0088489	21526	0.0507318	0.0228147	-5.46014	1.29472
1422	AKAP17A_X	HGLibA_01422	CAGCTGCCGCTTCTTAATTG	9.79616	5.25131	0.0820784	0.0952331		0.00972147	0.0181351	-6.68461	-5.78507	0.0820773	63842	0.158661	0.0139283	-6.23484	0.799529
1423	AKAP17A_Y	HGLibA_01423	AGGACTCACCTTGATGTTGC	0.0447313	0.0535848	0.0410392	0.0476165		1.0645	0.888621	0.0901775	-0.17036	0.473465	117289	0.498178	0.976561	-0.0400912	0.302616
1424	AKAP17A_Y	HGLibA_01424	CATCGTGCACGACACGTCTG	0.0447313	0.0535848	0.0410392	0.0476165		1.0645	0.888621	0.0901775	-0.17036	0.473465	117290	0.498174	0.976561	-0.0400912	0.302619
1425	AKAP17A_Y	HGLibA_01425	CAGCTGCCGCTTCTTAATTG	0.0447313	0.0535848	0.0410392	0.0476165		1.0645	0.888621	0.0901775	-0.17036	0.473465	117291	0.498169	0.976561	-0.0400912	0.302623
1426	AKAP2	HGLibA_01426	TTCTATTCACCCCCGCATAA	1.74452	0.214339	0.0410392	0.0952331		0.0545898	0.44431	-4.19522	-1.17036	0.356045	109587	0.400959	0.24945	-2.68279	0.3969
1427	AKAP2	HGLibA_01427	TCAACAAGCCATAGCCGAGC	1.69979	0.214339	0.0410392	0.0476165		0.0280132	0.222155	-5.15775	-2.17036	0.344083	108632	0.390894	0.125084	-3.66405	0.407941
1428	AKAP2	HGLibA_01428	CTTTCTTCGATTAACCCGTG	3.08646	8.89507	0.123118	0.190466		0.0617102	0.0214126	-4.01835	-5.5454	0.182338	88909	0.253097	0.0415614	-4.78187	0.596714
1429	AKAP3	HGLibA_01429	GTGATTGCTGACAATCACCG	0.268388	0.0535848	0.0410392	0.0476165		0.177417	0.888621	-2.49478	-0.17036	0.391056	111886	0.431338	0.533019	-1.33257	0.365183
1430	AKAP3	HGLibA_01430	GTCGGTGCTGCGCTATGAGA	5.23356	2.83999	0.164157	0.0476165		0.0090983	0.0167664	-6.78019	-5.89828	0.08169	63716	0.158225	0.0129324	-6.33923	0.800726
1431	AKAP3	HGLibA_01431	GAAGGCCGAAGTTAGCCTAC	0.939358	9.21658	0.123118	0.0952331		0.101381	0.0103328	-3.30214	-6.59662	0.352819	109402	0.397998	0.0558569	-4.94938	0.400119
1432	AKAP4	HGLibA_01432	GGCGTACTCTGATACTACAA	1.83398	0.857356	0.0410392	0.0952331		0.0519269	0.111078	-4.26737	-3.17036	0.120606	75479	0.197195	0.0815023	-3.71887	0.705104
1433	AKAP4	HGLibA_01433	AGATGTCTGATGATATTGAC	6.03873	10.8241	0.123118	0.0952331		0.0157704	0.00879823	-5.98664	-6.82857	0.0736471	60777	0.149544	0.0122843	-6.4076	0.82523
1434	AKAP4	HGLibA_01434	TCCTGATCTTGCTGTCCTTC	76.8037	77.4836	1.31325	1.52373		0.0198393	0.0196652	-5.6555	-5.66821	2.20837e-05	442	0.00616599	0.0197522	-5.66185	2.21
1435	AKAP5	HGLibA_01435	TCAAACGTCTTGTAACACGC	6.7097	7.34111	0.0410392	0.0476165		0.00709667	0.00648628	-7.13864	-7.26839	0.00203911	10287	0.0244628	0.00679148	-7.20352	1.61149
1436	AKAP5	HGLibA_01436	GCATCCTCAGCATTTATTGC	5.41249	8.0913	0.0820784	0.238083		0.0439877	0.0294245	-4.50676	-5.08684	0.0390185	45287	0.106329	0.0367061	-4.7968	0.973349
1437	AKAP5	HGLibA_01437	TGTTACAAGACGTTTGAGTG	6.66497	9.80601	0.123118	0.0952331		0.0142886	0.0097117	-6.12899	-6.68606	0.0353832	43247	0.100971	0.0120002	-6.40753	0.995805
1438	AKAP6	HGLibA_01438	CCTGAGCTTATCCGAAGTGT	15.7007	15.5396	0.287275	0.428549		0.0272949	0.0275779	-5.19522	-5.18034	4.92754e-05	873	0.00696579	0.0274364	-5.18778	2.15703
1439	AKAP6	HGLibA_01439	CCATTCCTAGTGACGTGACT	14.5824	19.7728	0.369353	0.0952331		0.00653068	0.00481637	-7.25855	-7.69784	0.022722	34750	0.0806947	0.00567353	-7.47819	1.09316
1440	AKAP6	HGLibA_01440	TTACTCTGTCAACGTGATAG	7.78325	12.4317	0.164157	0.190466		0.0244713	0.0153211	-5.35277	-6.02834	0.0506571	51248	0.121988	0.0198962	-5.69055	0.913683
1441	AKAP7	HGLibA_01441	AATACAACAAGATGAGCGAC	3.93636	7.76979	0.0820784	0.190466		0.0483864	0.0245137	-4.36925	-5.35027	0.096493	68587	0.173623	0.03645	-4.85976	0.760392
1442	AKAP7	HGLibA_01442	AGCCAATACTATGGATTCTC	10.1987	5.73357	0.0820784	0.14285		0.0140066	0.0249146	-6.15775	-5.32686	0.0721834	60246	0.147864	0.0194606	-5.74231	0.830137
1443	AKAP7	HGLibA_01443	TTAATAATTGCATCACCAGC	2.37076	1.17886	0.123118	0.0952331		0.0401699	0.0807837	-4.63774	-3.62979	0.107771	71853	0.185102	0.0604768	-4.13377	0.732589
1444	AKAP8	HGLibA_01444	TTTGACCGCTTCGGACCAGA	2.01291	2.03622	0.0410392	0.0476165		0.0236556	0.0233848	-5.40168	-5.41829	3.74018e-05	681	0.00677797	0.0235202	-5.40998	2.1689
1445	AKAP8	HGLibA_01445	GAAGCAGTTCCAACTTTACG	1.16301	1.44679	0.0410392	0.0476165		0.0409424	0.0329119	-4.61026	-4.92525	0.01244	25767	0.0595813	0.0369271	-4.76775	1.22489
1446	AKAP8	HGLibA_01446	TTCTTGCAGGCTACGGGGCG	0.492044	2.25056	0.0410392	0.0952331		0.193546	0.0423153	-2.36925	-4.56268	0.276677	102635	0.332684	0.11793	-3.46597	0.477969
1447	AKAP8L	HGLibA_01447	ATCTAAGCGCTGGTTAATTC	2.90754	5.35848	0.123118	0.14285		0.0491308	0.0266586	-4.34723	-5.22925	0.0824268	63953	0.15906	0.0378947	-4.78824	0.798439
1448	AKAP8L	HGLibA_01448	TGTTGTCCGAGCAGTCCGTG	34.0405	25.9886	0.656627	0.714248		0.0209823	0.0274831	-5.57468	-5.18531	0.0183271	31328	0.0721965	0.0242327	-5.38	1.14148
1449	AKAP8L	HGLibA_01449	AATTAACCAGCGCTTAGATA	1.5656	1.28603	0.123118	0.0952331		0.0608286	0.0740517	-4.03911	-3.75532	0.0111924	24376	0.0566648	0.0674402	-3.89721	1.24669
1450	AKAP9	HGLibA_01450	TCCGACTCATCTAGAGATGA	15.0745	16.2362	0.328314	0.14285		0.00947627	0.00879823	-6.72146	-6.82857	0.00145204	8574	0.0209001	0.00913725	-6.77502	1.67985
1451	AKAP9	HGLibA_01451	AGAAATAACCAGTCATGAGC	0.760432	0.10717	0.0410392	0.0476165		0.0626177	0.44431	-3.99729	-1.17036	0.355416	109525	0.400478	0.253464	-2.58382	0.397422
1452	AKAP9	HGLibA_01452	ATAATGAGAACTCTACATAG	1.34194	0.214339	0.0820784	0.0476165		0.0354834	0.222155	-4.81671	-2.17036	0.333436	107855	0.381528	0.128819	-3.49354	0.418474
1453	AKIP1	HGLibA_01453	CATGCCCTGGAGCGTCCCAA	8.40949	4.76904	0.123118	0.0476165		0.00566224	0.0099845	-7.46441	-6.64609	0.0702069	59494	0.145633	0.00782337	-7.05525	0.836739
1454	AKIP1	HGLibA_01454	TCTCCCGGGAGAACGCGCTG	1.69979	5.46565	0.0820784	0.0952331		0.0560264	0.0174239	-4.15775	-5.84279	0.204649	92827	0.272075	0.0367252	-5.00027	0.565311
1455	AKIP1	HGLibA_01455	CATGTCTATCGTTATCACAG	36.5902	23.4165	0.451431	0.571398		0.0156162	0.0244015	-6.00082	-5.35689	0.046439	49195	0.116497	0.0200088	-5.67885	0.933684
1456	AKIRIN1	HGLibA_01456	ACATTTACCCTCCGACAAGT	4.60733	4.98338	0.0410392	0.0476165		0.010335	0.00955506	-6.59632	-6.70952	0.0015631	8931	0.0215993	0.00994501	-6.65292	1.66556
1457	AKIRIN1	HGLibA_01457	CCTGGGCCTACCTGCTAGTT	25.0943	17.7901	0.287275	0.333316		0.0132825	0.018736	-6.23432	-5.73804	0.0285938	38856	0.0908172	0.0160093	-5.98618	1.04183
1458	AKIRIN1	HGLibA_01458	CACATGATCAGATTATGCGA	2.54968	0.10717	0.0410392	0.0952331		0.0373509	0.888621	-4.74271	-0.17036	0.410638	113305	0.447263	0.462986	-2.45654	0.349437
1459	AKIRIN2	HGLibA_01459	GATCAAATAATGCGACGATA	1.29721	1.71471	0.0410392	0.0476165		0.0367069	0.0277694	-4.7678	-5.17036	0.019799	32587	0.0749814	0.0322382	-4.96908	1.12505
1460	AKIRIN2	HGLibA_01460	AACCTGCCGTAGAGTAAATA	1.47613	1.92905	0.0410392	0.0476165		0.0322576	0.0246839	-4.95422	-5.34028	0.0181474	31174	0.0718415	0.0284708	-5.14725	1.14362
1461	AKIRIN2	HGLibA_01461	ATGTTATTACCTGGTGAAGC	1.20775	2.67924	0.0410392	0.0952331		0.0788519	0.0355448	-3.66471	-4.81422	0.125713	76748	0.202147	0.0571984	-4.23946	0.694334
1462	AKNA	HGLibA_01462	ACCATTGACCAGCTACGCCT	3.7127	8.89507	0.0410392	0.14285		0.0384759	0.0160594	-4.6999	-5.96044	0.13874	79808	0.21454	0.0272677	-5.33017	0.668491
1463	AKNA	HGLibA_01463	CCTGGGGCACCATTCCCGTG	0.492044	0.964526	0.0410392	0.0952331		0.193546	0.0987357	-2.36925	-3.34028	0.108951	72214	0.186193	0.146141	-2.85477	0.730036
1464	AKNA	HGLibA_01464	CTCAAGTCTCCTCGAGCTGA	10.0198	3.75093	0.205196	0.238083		0.0237612	0.0634729	-5.39525	-3.97771	0.167393	86088	0.239965	0.0436171	-4.68648	0.619851
1465	AKNAD1	HGLibA_01465	CTGACCAACTCAACCCGAAA	0.0447313	1.50037	0.0820784	0.0476165		1.0645	0.0317365	0.0901775	-4.97771	0.433544	116674	0.458577	0.548119	-2.44377	0.338587
1466	AKNAD1	HGLibA_01466	TAGACTATCTTGCACAAGAG	3.44431	2.78641	0.123118	0.0952331		0.0276494	0.0341777	-5.17661	-4.8708	0.0117838	25056	0.0580398	0.0309136	-5.0237	1.23627
1467	AKNAD1	HGLibA_01467	ATCCACCAAGAACTTCTCAC	3.35485	4.2332	0.0410392	0.0476165		0.0141933	0.0112484	-6.13864	-6.47414	0.0134425	26769	0.0619727	0.0127209	-6.30639	1.2078
1468	AKR1A1	HGLibA_01468	ATCACGCCATGCACGATCAG	42.8526	36.5448	0.574549	0.285699		0.00666702	0.00781778	-7.22874	-6.99903	0.00640218	18403	0.0429332	0.0072424	-7.11388	1.36721
1469	AKR1A1	HGLibA_01469	GGTGGAATGCCACCCATACT	15.1192	7.87696	0.205196	0.238083		0.0157471	0.0302252	-5.98877	-5.0481	0.0894945	66443	0.166227	0.0229861	-5.51844	0.779299
1470	AKR1A1	HGLibA_01470	GTTAAGTATGCCCTTAGCGT	8.45422	6.00149	0.205196	0.14285		0.0168968	0.0238023	-5.8871	-5.39275	0.0289395	39074	0.0914022	0.0203496	-5.63993	1.03904
1471	AKR1B1	HGLibA_01471	TCAGGTCGCTGAGTGTCTTC	23.2156	27.8641	0.451431	0.761865		0.032817	0.0273422	-4.92941	-5.19273	0.00861601	21190	0.0501798	0.0300796	-5.06107	1.29947
1472	AKR1B1	HGLibA_01472	TGGGCTCACAGGTCCTGATC	16.4611	12.0566	0.164157	0.285699		0.017356	0.0236966	-5.84842	-5.39918	0.0237692	35504	0.082621	0.0205263	-5.6238	1.08291
1473	AKR1B1	HGLibA_01473	TCCCATACCTTAAAGCCAGT	0.849895	0.375093	0.0410392	0.0476165		0.0560264	0.126946	-4.15775	-2.97771	0.139095	79919	0.214791	0.0914861	-3.56773	0.667983
1474	AKR1B10	HGLibA_01474	TGGCCATTGATGCAGGATAT	5.81507	7.07319	0.0820784	0.14285		0.0245654	0.0201959	-5.34723	-5.62979	0.00974924	22675	0.0530613	0.0223807	-5.48851	1.27522
1475	AKR1B10	HGLibA_01475	CGGTGGAAAAGCAACGTTCT	0.536776	0.267924	0.0410392	0.0952331		0.177417	0.355448	-2.49478	-1.49229	0.135066	78930	0.211183	0.266433	-1.99354	0.675341
1476	AKR1B10	HGLibA_01476	GTGCCGATATCCTGCATCAA	6.12819	3.8581	0.205196	0.0476165		0.00777008	0.012342	-7.00785	-6.34028	0.0505476	51205	0.121827	0.010056	-6.67407	0.914258
1477	AKR1B15	HGLibA_01477	CAGTGGAAAAGGAACGTTCT	5.94926	9.4845	0.246235	0.190466		0.0320151	0.0200818	-4.9651	-5.63797	0.0513391	51592	0.122806	0.0260485	-5.30154	0.91078
1478	AKR1B15	HGLibA_01478	TTTCTATGAGAATCAACATG	13.0168	9.16299	0.287275	0.238083		0.0182904	0.0259831	-5.77277	-5.26628	0.0302481	40014	0.0932912	0.0221367	-5.51953	1.03016
1479	AKR1B15	HGLibA_01479	GTGGCGATATTCTGCATCAA	0.0447313	1.0717	0.0410392	0.0952331		2.129	0.0888621	1.09018	-3.49229	0.441132	116869	0.465825	1.10893	-1.20106	0.331777
1480	AKR1C1	HGLibA_01480	GCCAGCTTCAATTGCCAATT	5.994	3.42942	0.205196	0.14285		0.0238321	0.0416541	-5.39095	-4.5854	0.0714448	59985	0.146988	0.0327431	-4.98817	0.832718
1481	AKR1C1	HGLibA_01481	ACCAAATTGGCAATTGAAGC	1.02882	1.33962	0.0410392	0.0476165		0.0462827	0.0355448	-4.43338	-4.81422	0.0180907	31132	0.0717136	0.0409137	-4.6238	1.1444
1482	AKR1C1	HGLibA_01482	CTTATTACCATGGTTCTTCT	2.997	4.87621	0.164157	0.0952331		0.0317762	0.0195301	-4.97591	-5.67815	0.0559315	53703	0.128532	0.0256531	-5.32703	0.890988
1483	AKR1C2	HGLibA_01483	GGCTTCTATTGCCAATTTGA	0.313119	0.321509	0.0410392	0.0476165		0.152072	0.148103	-2.71718	-2.75532	0.000381023	3940	0.0119346	0.150088	-2.73625	1.92319
1484	AKR1C2	HGLibA_01484	ATTACCATGGTTCTTCTCGA	2.68388	5.25131	0.0410392	0.0476165		0.0177417	0.00906756	-5.81671	-6.78507	0.0924559	67349	0.169417	0.0134046	-6.30089	0.771042
1485	AKR1C2	HGLibA_01485	GTCAAATTGGCAATAGAAGC	1.20775	0.321509	0.0410392	0.0476165		0.039426	0.148103	-4.66471	-2.75532	0.245568	98709	0.307021	0.0937647	-3.71002	0.512831
1486	AKR1C3	HGLibA_01486	GGTTCCGAGAAGTAAAGCTT	4.4284	1.7683	0.0410392	0.0952331		0.0215051	0.0538558	-5.53918	-4.21475	0.150428	82504	0.225014	0.0376804	-4.87697	0.647791
1487	AKR1C3	HGLibA_01487	CAACTCTGGTCGATGAAAAG	4.02582	2.41131	0.0820784	0.0476165		0.0118278	0.0197471	-6.40168	-5.66221	0.0597364	55315	0.133275	0.0157875	-6.03194	0.87525
1488	AKR1C3	HGLibA_01488	CTGCATACCTTTAGAGACAT	14.5824	11.1456	0.410392	0.476165		0.0326534	0.0427222	-4.93662	-4.54887	0.0186143	31593	0.0727128	0.0376878	-4.74275	1.13839
1489	AKR1C4	HGLibA_01489	AAAAGTAATATTCGACACAG	0.223657	0.857356	0.0410392	0.0476165		0.2129	0.0555388	-2.23175	-4.17036	0.257865	100350	0.317124	0.13422	-3.20106	0.498772
1490	AKR1C4	HGLibA_01490	GCCAGCTTCTATTGCTAATT	7.11228	0.964526	0.0410392	0.14285		0.0200849	0.148103	-5.63774	-2.75532	0.327888	107368	0.376881	0.0840942	-4.19653	0.423796
1491	AKR1C4	HGLibA_01491	TTCCCTACCTTGAGAGCCAT	20.0396	9.59167	0.205196	0.238083		0.0118806	0.0248218	-6.39525	-5.33225	0.107806	71859	0.185146	0.0183512	-5.86375	0.732486
1492	AKR1D1	HGLibA_01492	AACCTTCACCGATGTTGCAC	26.6599	29.2573	0.369353	0.523782		0.0196468	0.0179026	-5.66956	-5.80369	0.00222873	10769	0.0255408	0.0187747	-5.73662	1.59276
1493	AKR1D1	HGLibA_01493	TGTAGGCCCCATCAATATGT	3.44431	4.98338	0.164157	0.0476165		0.0138247	0.00955506	-6.17661	-6.70952	0.0335281	42171	0.098118	0.0116899	-6.44306	1.00825
1494	AKR1D1	HGLibA_01494	TTACATCATTGAAGTACCCA	6.30712	8.7879	0.0820784	0.0952331		0.0150993	0.0108368	-6.04937	-6.52791	0.026559	37481	0.0874489	0.0129681	-6.28864	1.05825
1495	AKR1E2	HGLibA_01495	ACCATGTTGCTCTCGTCCAG	11.7196	11.8422	0.164157	0.238083		0.0203149	0.0201045	-5.62132	-5.63633	3.82224e-05	710	0.00664376	0.0202097	-5.62883	2.17759
1496	AKR1E2	HGLibA_01496	CCTCTCACATCCTCGAGTGC	19.9949	34.5622	0.164157	0.428549		0.0214329	0.0123994	-5.54403	-6.33359	0.0657819	57809	0.140432	0.0169161	-5.93881	0.852535
1497	AKR1E2	HGLibA_01497	GAACGGTACCTTGAAACCCA	8.8568	5.03697	0.164157	0.14285		0.0161288	0.0283602	-5.95422	-5.13999	0.0707574	59716	0.146229	0.0222445	-5.5471	0.834965
1498	AKR7A2	HGLibA_01498	CCCGGCTCACCGATTCCTGT	6.21765	7.82337	0.205196	0.0952331		0.0153166	0.0121729	-6.02876	-6.36018	0.0134442	26771	0.061976	0.0137447	-6.19447	1.20778
1499	AKR7A2	HGLibA_01499	GCCTCTCCAACTATGCTAGC	2.2813	1.87547	0.0820784	0.0476165		0.0208726	0.0253892	-5.58225	-5.29964	0.0100746	23064	0.0539075	0.0231309	-5.44095	1.26835
1500	AKR7A2	HGLibA_01500	CACTTCCCAGCTAGCATAGT	25.0048	17.6294	0.328314	0.380932		0.0152344	0.0216078	-6.03653	-5.5323	0.0295828	39527	0.0923633	0.0184211	-5.78442	1.0345
1501	AKR7A3	HGLibA_01501	CCCAAACAGTGGAATGGCCT	3.31012	4.76904	0.123118	0.190466		0.0575406	0.039938	-4.11928	-4.64609	0.0335983	42220	0.0982093	0.0487393	-4.38268	1.00785
1502	AKR7A3	HGLibA_01502	ATACCTGGGCAGAGATGTAC	2.54968	2.41131	0.0820784	0.14285		0.0560264	0.0592414	-4.15775	-4.07725	0.00101669	6985	0.0179629	0.0576339	-4.1175	1.74562
1503	AKR7A3	HGLibA_01503	GCCTCTCCAACTATGCAGCC	2.46022	1.01811	0.0410392	0.0952331		0.0387091	0.093539	-4.69118	-3.41829	0.14655	81680	0.221424	0.0661241	-4.05473	0.654775
1504	AKT1	HGLibA_01504	TGTGCCGCAAAAGGTCTTCA	17.1321	5.94791	0.205196	0.238083		0.0138969	0.040028	-6.16909	-4.64285	0.180278	88544	0.251268	0.0269624	-5.40597	0.599862
1505	AKT1	HGLibA_01505	TCACGTTGGTCCACATCCTG	44.955	40.9388	0.615588	0.523782		0.0116513	0.0127943	-6.42337	-6.28836	0.00223912	10791	0.0256076	0.0122228	-6.35586	1.59163
1506	AKT1	HGLibA_01506	GCAGGATGTGGACCAACGTG	16.4164	11.5743	0.123118	0.0952331		0.0058011	0.00822797	-7.42946	-6.92525	0.0290792	39163	0.0916348	0.00701453	-7.17735	1.03794
1507	AKT1S1	HGLibA_01507	CGCGCATGCTCGCCGCGATG	43.3894	25.9886	0.369353	0.619015		0.0142665	0.0238187	-6.13122	-5.39176	0.0590717	55045	0.132439	0.0190426	-5.76149	0.877985
1508	AKT1S1	HGLibA_01508	AACGGCGCGCTGCCTCCGCC	4.92044	11.7351	0.205196	0.0952331		0.0193546	0.00811526	-5.69118	-6.94515	0.138479	79738	0.214325	0.0137349	-6.31816	0.668927
1509	AKT1S1	HGLibA_01509	TGTGGGCCAGTGCGATGTCG	9.34884	7.07319	0.205196	0.0952331		0.0101866	0.013464	-6.61718	-6.21475	0.0193924	32209	0.0743034	0.0118253	-6.41597	1.12899
1510	AKT2	HGLibA_01510	TCTCGTCTGGAGAATCCACG	8.58841	2.83999	0.0820784	0.0476165		0.00554428	0.0167664	-7.49478	-5.89828	0.188281	89980	0.258234	0.0111554	-6.69653	0.587986
1511	AKT2	HGLibA_01511	CATCGAGAGGACCTTCCACG	15.1192	10.6634	0.0820784	0.14285		0.00944824	0.0133963	-6.72574	-6.22202	0.0290818	39167	0.0916336	0.0114223	-6.47388	1.03795
1512	AKT2	HGLibA_01512	TTAAACAACTTCTCCGTAGC	4.47313	5.09055	0.0410392	0.190466		0.04258	0.0374156	-4.55368	-4.74022	0.00460162	15555	0.0365086	0.0399978	-4.64695	1.43761
1513	AKT3	HGLibA_01513	AGAATGGACAGAAGCTATCC	4.60733	2.35773	0.0410392	0.14285		0.0310049	0.0605878	-5.01136	-4.04483	0.0948488	68089	0.171913	0.0457963	-4.52809	0.764691
1514	AKT3	HGLibA_01514	TAAGGTAAATCCACATCTTG	10.0645	6.69809	0.123118	0.14285		0.0141933	0.0213269	-6.13864	-5.55118	0.0392122	45412	0.106562	0.0177601	-5.84491	0.972396
1515	AKT3	HGLibA_01515	TTGCCACTGAAAAGTTGTTG	0.0447313	0.589432	0.0410392	0.0476165		1.0645	0.0807837	0.0901775	-3.62979	0.422108	115441	0.45125	0.572642	-1.76981	0.345583
1516	AKTIP	HGLibA_01516	CTTACTGGACAGTCACCATC	16.3269	14.843	0.0820784	0.285699		0.0174986	0.0192481	-5.83661	-5.69914	0.00235636	11061	0.0262907	0.0183734	-5.76788	1.5802
1517	AKTIP	HGLibA_01517	CACCACTTACCTAATTGCAT	2.59442	2.57207	0.0410392	0.238083		0.0917673	0.0925647	-3.44588	-3.43339	0.00164231	9185	0.0220663	0.092166	-3.43963	1.65627
1518	AKTIP	HGLibA_01518	TAGAAGACCCCTATGCAATT	0.268388	0.214339	0.0410392	0.0476165		0.177417	0.222155	-2.49478	-2.17036	0.0185603	31510	0.0726925	0.199786	-2.33257	1.13851
1519	ALAD	HGLibA_01519	GCCCCGTCGGACATGATGGA	4.11528	4.34037	0.0410392	0.190466		0.0462827	0.0438825	-4.43338	-4.51021	0.00107743	7247	0.0183478	0.0450826	-4.4718	1.73642
1520	ALAD	HGLibA_01520	CGTCCATCCATCATGTCCGA	29.0306	13.3962	0.492471	0.380932		0.0131217	0.0284359	-6.2519	-5.13614	0.117199	74544	0.194028	0.0207788	-5.69402	0.712135
1521	ALAD	HGLibA_01521	CTCGCCGTGTACCACGTCTC	16.148	25.3992	0.369353	0.428549		0.0265388	0.0168725	-5.23575	-5.88918	0.0478722	49946	0.118287	0.0217057	-5.56247	0.927063
1522	ALAS1	HGLibA_01522	GTGGTTAGTGTGAAAACCGA	2.59442	2.25056	0.0820784	0.0952331		0.0367069	0.0423153	-4.7678	-4.56268	0.00539097	16812	0.0395732	0.0395111	-4.66524	1.4026
1523	ALAS1	HGLibA_01523	GTCATTGGCCACAAAGCACG	14.9403	9.32375	0.123118	0.190466		0.0127485	0.0204281	-6.29353	-5.6133	0.0508427	51329	0.122242	0.0165883	-5.95342	0.91278
1524	ALAS1	HGLibA_01524	ATAACTGCCCCACACACCCG	1.07355	4.12603	0.164157	0.14285		0.133063	0.0346216	-2.90982	-4.85218	0.250161	99369	0.310686	0.0838421	-3.881	0.507678
1525	ALAS2	HGLibA_01525	TGCGAGATTTACTCAGACGC	0.357851	2.08981	0.0820784	0.0476165		0.133063	0.0227852	-2.90982	-5.45576	0.312715	106035	0.363959	0.0779239	-4.18279	0.438947
1526	ALAS2	HGLibA_01526	CTCCACTGTTACGGATACCT	17.311	9.4845	0.287275	0.333316		0.0192545	0.0351432	-5.69866	-4.83061	0.0789639	62754	0.155289	0.0271989	-5.26463	0.808859
1527	ALAS2	HGLibA_01527	GACAGCGTCCAATACCAAAC	26.3467	8.73432	0.123118	0.380932		0.0144584	0.0436133	-6.11195	-4.51909	0.188632	90037	0.258552	0.0290359	-5.31552	0.587452
1528	ALB	HGLibA_01528	TGCTCATCGGTTTAAAGATT	16.5953	10.5562	0.287275	0.285699		0.0172157	0.0270646	-5.86014	-5.20745	0.0479454	49996	0.118349	0.0221401	-5.53379	0.926835
1529	ALB	HGLibA_01529	CGATGAATTTAAACCTCTTG	0.715701	0.267924	0.0410392	0.0476165		0.0665313	0.177724	-3.90982	-2.49229	0.183711	89138	0.254346	0.122128	-3.20106	0.594574
1530	ALB	HGLibA_01530	AATGTGATGTTATAAGCCTA	5.50195	3.59018	0.123118	0.0952331		0.017309	0.026526	-5.85234	-5.23645	0.0434231	47676	0.112402	0.0219175	-5.54439	0.949225
1531	ALCAM	HGLibA_01531	AAAGTGCTACATCCCCTTGA	17.0426	11.2528	0.287275	0.380932		0.0223517	0.0338522	-5.48347	-4.88461	0.041233	46502	0.109428	0.028102	-5.18404	0.960873
1532	ALCAM	HGLibA_01532	TACCATGTGATATTGCCATC	8.23056	19.0226	0.369353	0.190466		0.0231413	0.0100126	-5.43338	-6.64204	0.131911	78220	0.208121	0.016577	-6.03771	0.681683
1533	ALCAM	HGLibA_01533	TCATTGACTCTCATTGTAGA	3.98109	4.66187	0.164157	0.0476165		0.0119607	0.010214	-6.38556	-6.6133	0.00664421	18714	0.0438158	0.0110874	-6.49943	1.35837
1534	ALDH16A1	HGLibA_01534	GGATAGAATGGGCGTTCCGA	0.67097	0.428678	0.0410392	0.0476165		0.0709667	0.111078	-3.81671	-3.17036	0.0529538	52350	0.124834	0.0910222	-3.49354	0.903665
1535	ALDH16A1	HGLibA_01535	AAGGGGGAGGCCACGACCAC	5.2783	5.09055	0.123118	0.14285		0.0270636	0.0280617	-5.2075	-5.15525	0.000348965	3743	0.0115058	0.0275627	-5.18138	1.93908
1536	ALDH16A1	HGLibA_01536	GCCCCCGCGGGGCGTCCCGT	0.0447313	0.375093	0.0410392	0.0476165		1.0645	0.126946	0.0901775	-2.97771	0.421787	115004	0.45262	0.595724	-1.44377	0.344266
1537	ALDH18A1	HGLibA_01537	GCGCAAGCGTTGTTTGCCAA	1.29721	3.69735	0.0410392	0.0952331		0.0734139	0.0257571	-3.7678	-5.27888	0.180323	88550	0.251313	0.0495855	-4.52334	0.599784
1538	ALDH18A1	HGLibA_01538	ACAGGCAATTCCAGTCTTAG	2.46022	1.23245	0.0820784	0.0476165		0.0193546	0.0386357	-5.69118	-4.69392	0.10113	69986	0.17833	0.0289951	-5.19255	0.748777
1539	ALDH18A1	HGLibA_01539	GGGCAGCACAGATGCTGTAC	3.75743	4.60829	0.123118	0.0476165		0.0126726	0.0103328	-6.30214	-6.59662	0.010691	23829	0.0553687	0.0115027	-6.44938	1.25674
1540	ALDH1A1	HGLibA_01540	GTATAATAGTCGCCCCCTCT	0.715701	2.08981	0.0410392	0.0476165		0.0665313	0.0227852	-3.90982	-5.45576	0.186648	89709	0.256768	0.0446582	-4.68279	0.590459
1541	ALDH1A1	HGLibA_01541	AAGCATCCATAGTACGCCAC	9.39358	18.326	0.164157	0.0952331		0.0101381	0.00519661	-6.62407	-7.58821	0.0915225	67057	0.168437	0.00766736	-7.10614	0.773562
1542	ALDH1A1	HGLibA_01542	AAAACATTGCGCTACTGTGC	10.4671	12.8068	0.205196	0.238083		0.0227458	0.0185904	-5.45826	-5.7493	0.0103411	23418	0.0544969	0.0206681	-5.60378	1.26363
1543	ALDH1A2	HGLibA_01543	AAAACCTTTCGATATTACGC	0.0447313	1.71471	0.0410392	0.0476165		1.0645	0.0277694	0.0901775	-5.17036	0.422467	116223	0.448595	0.546135	-2.54009	0.348146
1544	ALDH1A2	HGLibA_01544	CCAGCCTGCGTAATATCGAA	3.44431	6.53734	0.164157	0.0476165		0.0138247	0.00728378	-6.17661	-7.1011	0.0874107	65718	0.164148	0.0105542	-6.63885	0.784766
1545	ALDH1A2	HGLibA_01545	ACCACTCAGTGCACTCTACA	8.94626	9.75243	0.164157	0.285699		0.031935	0.0292952	-4.96872	-5.09319	0.00198994	10127	0.02425	0.0306151	-5.03095	1.61529
1546	ALDH1A3	HGLibA_01546	CGTCCCGGAGCAATCTGAAG	0.939358	2.30414	0.0820784	0.0476165		0.0506905	0.0206656	-4.30214	-5.59662	0.150116	82440	0.224721	0.0356781	-4.94938	0.648356
1547	ALDH1A3	HGLibA_01547	AGCGTCCGCACACACGATGC	13.0168	27.4354	0.369353	0.333316		0.0256066	0.0121491	-5.28734	-6.36301	0.110243	72565	0.18749	0.0188778	-5.82517	0.727023
1548	ALDH1A3	HGLibA_01548	CATATTTGCTCCCGAGTTGA	2.72861	3.05433	0.0410392	0.14285		0.0523525	0.0467695	-4.2556	-4.41829	0.00369432	13883	0.0328401	0.049561	-4.33694	1.4836
1549	ALDH1B1	HGLibA_01549	GGTAGGGTTGACCGTCGGGA	0.581507	0.0535848	0.0410392	0.0476165		0.0818847	0.888621	-3.61026	-0.17036	0.409416	113173	0.446453	0.485253	-1.89031	0.350224
1550	ALDH1B1	HGLibA_01550	GAGCAGTTTGAACGAGTCCT	3.44431	3.8581	0.0820784	0.0476165		0.0138247	0.012342	-6.17661	-6.34028	0.00333442	13197	0.0311817	0.0130833	-6.25845	1.5061
1551	ALDH1B1	HGLibA_01551	CGAAACGCTCTCCGCCACAG	7.20174	4.5547	0.164157	0.190466		0.0264472	0.0418175	-5.24074	-4.57975	0.0499027	50913	0.120962	0.0341323	-4.91025	0.917351
1552	ALDH1L1	HGLibA_01552	TGAACACACCCACCACTTCG	5.994	2.41131	0.0820784	0.0476165		0.00794404	0.0197471	-6.97591	-5.66221	0.147158	81804	0.222006	0.0138456	-6.31906	0.653636
1553	ALDH1L1	HGLibA_01553	AAGGAGGGCCACGAAGTGGT	0.313119	3.48301	0.0820784	0.0476165		0.152072	0.0136711	-2.71718	-6.19273	0.366929	110319	0.410474	0.0828713	-4.45495	0.386714
1554	ALDH1L1	HGLibA_01554	GGAGACGCTTTGCCCATCCC	17.5347	7.71621	0.287275	0.238083		0.0135778	0.0308549	-6.2026	-5.01836	0.128085	77372	0.204301	0.0222164	-5.61048	0.68973
1555	ALDH1L2	HGLibA_01555	CTATAGCCACCTCCGCAAAG	2.41549	0.910941	0.0410392	0.0476165		0.019713	0.0522718	-5.66471	-4.25782	0.164306	85437	0.237334	0.0359924	-4.96127	0.62464
1556	ALDH1L2	HGLibA_01556	AAGTGCATCCACTGTATCAT	12.3906	11.9494	0.0820784	0.285699		0.0230578	0.0239091	-5.4386	-5.3863	0.000410586	4151	0.0122069	0.0234834	-5.41245	1.9134
1557	ALDH1L2	HGLibA_01557	CTGTGAACACCCCTACTACT	1.07355	1.82188	0.0820784	0.0476165		0.0443542	0.0261359	-4.49478	-5.25782	0.066166	57941	0.14093	0.0352451	-4.8763	0.850997
1558	ALDH2	HGLibA_01558	CCCGCTCGATCAGATCGGCC	6.44131	4.07244	0.164157	0.0476165		0.00739237	0.0116924	-7.07975	-6.41829	0.0491287	50537	0.119972	0.00954237	-6.74902	0.92092
1559	ALDH2	HGLibA_01559	GCCTGGCCGATCTGATCGAG	1.5656	0.0535848	0.0410392	0.0476165		0.0304143	0.888621	-5.03911	-0.17036	0.417969	113844	0.453094	0.459518	-2.60473	0.343812
1560	ALDH2	HGLibA_01560	CCCACCGTCAATCCGTCCAC	24.5128	20.0407	0.328314	0.523782		0.0213677	0.0261359	-5.54842	-5.25782	0.0103296	23406	0.0544642	0.0237518	-5.40312	1.26389
1561	ALDH3A1	HGLibA_01561	GTTCGACCATATCCTGTACA	12.9274	9.75243	0.164157	0.380932		0.0294672	0.0390603	-5.08475	-4.67815	0.0200504	32772	0.0755047	0.0342637	-4.88145	1.12203
1562	ALDH3A1	HGLibA_01562	AGTTCCAGGTGCCAATGACG	7.64905	1.3932	0.0820784	0.190466		0.0249006	0.136711	-5.32767	-2.8708	0.29606	104573	0.349393	0.0808058	-4.09924	0.456686
1563	ALDH3A1	HGLibA_01563	GGGACACCCCCATTGATTAC	3.48904	1.12528	0.0410392	0.14285		0.0409424	0.126946	-4.61026	-2.97771	0.202005	92422	0.269737	0.0839441	-3.79399	0.569059
1564	ALDH3A2	HGLibA_01564	GTCCGACAGGCGTTCCTGTC	10.9144	12.1637	0.164157	0.190466		0.0174508	0.0156585	-5.84056	-5.99691	0.00301029	12517	0.0296799	0.0165547	-5.91873	1.52754
1565	ALDH3A2	HGLibA_01565	CGTGCGTACCTTGCACAGGT	9.61723	5.51923	0.123118	0.0952331		0.00990234	0.0172548	-6.65802	-5.85686	0.0678708	58612	0.142906	0.0135786	-6.25744	0.84495
1566	ALDH3A2	HGLibA_01566	TGGTGCTGATAATCGGAGCT	3.44431	3.32226	0.0410392	0.14285		0.0414741	0.0429978	-4.59165	-4.53959	0.000582508	5098	0.0141012	0.0422359	-4.56562	1.85074
1567	ALDH3B1	HGLibA_01567	TGGCCCGTGATTAGATAGTT	10.1093	6.05508	0.0820784	0.14285		0.0141305	0.0235917	-6.14504	-5.40558	0.0590365	55030	0.132396	0.0188611	-5.77531	0.878125
1568	ALDH3B1	HGLibA_01568	CCTTCCACGCGGGGCGCACG	0.0447313	3.69735	0.0820784	0.0476165		1.0645	0.0128786	0.0901775	-6.27888	0.42693	116442	0.452481	0.53869	-3.09435	0.344399
1569	ALDH3B1	HGLibA_01569	CTATCCGCTGAACCTGACGC	16.6848	15.6467	0.123118	0.14285		0.00856167	0.00912967	-6.86789	-6.77522	0.00104669	7085	0.0182319	0.00884567	-6.82156	1.73917
1570	ALDH3B2	HGLibA_01570	AGCGATCGCTCTCGTTGCTC	2.59442	8.03771	0.123118	0.14285		0.0550604	0.0177724	-4.18284	-5.81422	0.197162	91600	0.265633	0.0364164	-4.99853	0.575719
1571	ALDH3B2	HGLibA_01571	GCCCTCCTCACCTGCGGCGA	1063.8	2211.18	21862.2	22526		21.175	10.1873	4.40429	3.34871	0.00103794	7056	0.0181538	15.6812	3.8765	1.74103
1572	ALDH3B2	HGLibA_01572	TGGTCCTCATCATCGCACCC	15.2534	8.14488	0.123118	0.428549		0.0280953	0.0526157	-5.15353	-4.24836	0.0848283	64834	0.16147	0.0403555	-4.70094	0.791908
1573	ALDH4A1	HGLibA_01573	GCCCGTCTTAGCCTTCACGC	12.0327	14.843	0.164157	0.238083		0.0197863	0.0160401	-5.65936	-5.96217	0.0110892	24259	0.0564131	0.0179132	-5.81077	1.24862
1574	ALDH4A1	HGLibA_01574	TGAGCGAGATGCCCTGCAAA	3.17592	2.51848	0.0410392	0.14285		0.0449789	0.0567205	-4.47461	-4.13999	0.0142642	27620	0.0637351	0.0508497	-4.3073	1.19562
1575	ALDH4A1	HGLibA_01575	TCAGCATGTCTGCCGCCTTC	10.5566	5.03697	0.287275	0.190466		0.0180424	0.0378137	-5.79247	-4.72495	0.111509	72985	0.188552	0.027928	-5.25871	0.724569
1576	ALDH5A1	HGLibA_01576	GAGGAAGCCCGCCGTGTTTA	0.67097	2.03622	0.0410392	0.0476165		0.0709667	0.0233848	-3.81671	-5.41829	0.19514	91249	0.26392	0.0471758	-4.6175	0.578528
1577	ALDH5A1	HGLibA_01577	GAGAAGGGCGTGTCTTCGGC	0.805164	4.76904	0.0410392	0.0476165		0.059139	0.0099845	-4.07975	-6.64609	0.300599	105059	0.353109	0.0345617	-5.36292	0.452091
1578	ALDH5A1	HGLibA_01578	GATGACTGCAGCCACGCCTA	6.17292	3.75093	0.0410392	0.0952331		0.0154276	0.0253892	-6.01835	-5.29964	0.056154	53791	0.128832	0.0204084	-5.65899	0.889975
1579	ALDH6A1	HGLibA_01579	GAGAGCCATGGCGGCGCTAT	1.52086	6.91243	0.0820784	0.14285		0.0939266	0.0206656	-3.41232	-5.59662	0.267351	101383	0.32544	0.0572961	-4.50447	0.487529
1580	ALDH6A1	HGLibA_01580	CGCCGCCAATAGCGCCGCCA	4.60733	4.87621	0.123118	0.0476165		0.010335	0.00976507	-6.59632	-6.67815	0.00089816	6548	0.0169277	0.01005	-6.63724	1.7714
1581	ALDH6A1	HGLibA_01581	CCAACTGTAAAGCTCTTCAT	6.26238	5.73357	0.0410392	0.0952331		0.0152072	0.0166097	-6.03911	-5.91183	0.00200305	10154	0.024345	0.0159084	-5.97547	1.61359
1582	ALDH7A1	HGLibA_01582	CATTAGGTTATGGATCGCCC	20.5317	5.84074	0.246235	0.14285		0.00695752	0.0244575	-7.16721	-5.35358	0.218984	94956	0.284606	0.0157075	-6.2604	0.545756
1583	ALDH7A1	HGLibA_01583	CCTTTCTAGGATAATAGCCA	0.805164	1.17886	0.0410392	0.0476165		0.059139	0.0403919	-4.07975	-4.62979	0.0367555	44052	0.10297	0.0497654	-4.35477	0.987289
1584	ALDH7A1	HGLibA_01584	GCAGAATCTTTCGCTGGCTT	3.66797	4.50112	0.123118	0.190466		0.0519269	0.0423153	-4.26737	-4.56268	0.0111334	24315	0.0565078	0.0471211	-4.41503	1.24789
1585	ALDH8A1	HGLibA_01585	TCAGGACCCGTGAGCGCTCC	8.27529	2.94716	0.123118	0.14285		0.0172622	0.0484702	-5.85624	-4.36676	0.176049	87740	0.247622	0.0328662	-5.1115	0.606211
1586	ALDH8A1	HGLibA_01586	TCTGCGTGCACTCTGACGTG	24.5128	23.6309	0.451431	0.523782		0.0213677	0.0221651	-5.54842	-5.49556	0.000351724	3767	0.0115229	0.0217664	-5.52199	1.93844
1587	ALDH8A1	HGLibA_01587	CAGCACTCACCGACTCCCAC	11.6749	8.35922	0.328314	0.14285		0.0122356	0.0170889	-6.35277	-5.8708	0.027627	38207	0.0892368	0.0146623	-6.11178	1.04946
1588	ALDH9A1	HGLibA_01588	GTATAACCAAACGATCCACC	1.11828	1.60754	0.0410392	0.0476165		0.04258	0.0296207	-4.55368	-5.07725	0.0327441	41670	0.0969759	0.0361004	-4.81546	1.01334
1589	ALDH9A1	HGLibA_01589	GGTTTATGCAGGTAATGCCA	4.20474	1.98264	0.123118	0.0476165		0.0113245	0.0240168	-6.46441	-5.37981	0.113731	73578	0.190759	0.0176706	-5.92211	0.719514
1590	ALDH9A1	HGLibA_01590	AGTGAGGCTGGTGTACCTCC	5.90453	10.9313	0.123118	0.14285		0.0241932	0.013068	-5.36925	-6.25782	0.0810076	63493	0.157454	0.0186306	-5.81354	0.802846
1591	ALDOA	HGLibA_01591	TGTGCGGCGCAGCGCTGTGA	6.30712	4.50112	0.123118	0.0952331		0.0150993	0.0211576	-6.04937	-5.56268	0.0278799	38383	0.0896408	0.0181285	-5.80603	1.04749
1592	ALDOA	HGLibA_01592	ACGGAGCTGACTTCGCCAAG	11.3618	5.09055	0.164157	0.0952331		0.0083819	0.0187078	-6.89851	-5.74022	0.122945	76088	0.199411	0.0135449	-6.31936	0.700252
1593	ALDOA	HGLibA_01593	CCTTGCCAGGTGCCACGATG	21.471	41.2067	0.451431	0.380932		0.0177417	0.00924443	-5.81671	-6.7572	0.0885213	66050	0.165397	0.0134931	-6.28696	0.781471
1594	ALDOB	HGLibA_01594	GGTACCTATTGTTGAACCAG	2.63915	4.28678	0.0820784	0.0952331		0.0360848	0.0222155	-4.79247	-5.49229	0.0547596	53155	0.127136	0.0291502	-5.14238	0.89573
1595	ALDOB	HGLibA_01595	TCCATCCAGCCTCGCTATCC	51.1726	39.8135	0.615588	0.809481		0.0158186	0.0203318	-5.98223	-5.62012	0.0157126	28921	0.0670486	0.0180752	-5.80117	1.17361
1596	ALDOB	HGLibA_01596	TATCCACAGTTAGACCAAGG	3.17592	3.26867	0.123118	0.14285		0.0449789	0.0437027	-4.47461	-4.51613	0.000235444	2895	0.0100367	0.0443408	-4.49537	1.99841
1597	ALDOC	HGLibA_01597	GAACCGCCGGCTGTACCGCC	0.715701	1.28603	0.0410392	0.0476165		0.0665313	0.0370259	-3.90982	-4.75532	0.0785576	62613	0.154838	0.0517786	-4.33257	0.810123
1598	ALDOC	HGLibA_01598	CCACGACGATGCCCTTATCC	13.2405	28.9894	0.615588	0.285699		0.0215777	0.00985532	-5.53431	-6.66488	0.119737	75254	0.196359	0.0157165	-6.0996	0.706949
1599	ALDOC	HGLibA_01599	CACGTTGGCGTTCTCCAGAA	3.62324	1.60754	0.164157	0.0952331		0.026284	0.0592414	-5.24967	-4.07725	0.132622	78373	0.208835	0.0427627	-4.66346	0.680197
1600	ALG1	HGLibA_01600	GCAGTACCACGCGCTGTCGT	6.21765	12.8603	0.164157	0.0952331		0.0153166	0.00740517	-6.02876	-7.07725	0.105295	71170	0.182585	0.0113609	-6.55301	0.738535
1601	ALG1	HGLibA_01601	GCACCACCGCTACTACATGC	6.26238	11.0385	0.205196	0.14285		0.0228107	0.0129411	-5.45414	-6.2719	0.07103	59823	0.14653	0.0178759	-5.86302	0.834073
1602	ALG1	HGLibA_01602	GAAGCAAGCTCGTCATTGAC	5.05464	8.03771	0.0820784	0.285699		0.0565222	0.0355448	-4.14504	-4.81422	0.0510262	51429	0.122444	0.0460335	-4.47963	0.912061
1603	ALG10	HGLibA_01603	TGATCACTCCAATTGACACC	13.6431	18.8618	0.451431	0.238083		0.0174508	0.0126225	-5.84056	-6.30786	0.0259091	36973	0.086481	0.0150366	-6.07421	1.06308
1604	ALG10	HGLibA_01604	AATTCTACGTTTCCAAACTA	1.96818	1.87547	0.0410392	0.0476165		0.0241932	0.0253892	-5.36925	-5.29964	0.00061211	5255	0.0143751	0.0247912	-5.33445	1.84239
1605	ALG10	HGLibA_01605	GGGAGCTGGAATGGCGCAGC	1.25248	0.267924	0.0820784	0.0476165		0.0380179	0.177724	-4.71718	-2.49229	0.293532	104394	0.347004	0.107871	-3.60473	0.459666
1606	ALG10B	HGLibA_01606	AGCAGGAATGGCGCAGCTAG	0.894626	1.71471	0.0410392	0.0476165		0.0532251	0.0277694	-4.23175	-5.17036	0.0915506	67061	0.168479	0.0404972	-4.70106	0.773455
1607	ALG10B	HGLibA_01607	TGACCACTCCAACTGACACC	10.2435	23.6845	0.287275	0.285699		0.0278909	0.0120627	-5.16406	-6.3733	0.131179	78071	0.207362	0.0199768	-5.76868	0.683271
1608	ALG10B	HGLibA_01608	ACTCAGTTCACAAACAAGTC	3.26539	8.41281	0.0820784	0.0476165		0.0145822	0.00566001	-6.09965	-7.46498	0.154046	83328	0.228146	0.0101211	-6.78231	0.641787
1609	ALG11	HGLibA_01609	GGAAGATGGCGGCCGGCGAA	0.0447313	0.0535848	0.0410392	0.0476165		1.0645	0.888621	0.0901775	-0.17036	0.473465	117292	0.498165	0.976561	-0.0400912	0.302627
1610	ALG11	HGLibA_01610	CCCCCTATATACTTAAACAG	0.0447313	1.01811	0.0410392	0.0476165		1.0645	0.0467695	0.0901775	-4.41829	0.42234	115936	0.44957	0.555635	-2.16405	0.347203
1611	ALG11	HGLibA_01611	TGTTACGACAACCTCCAATG	9.5725	5.41206	0.287275	0.0952331		0.00994861	0.0175965	-6.65129	-5.82857	0.0726046	60388	0.148377	0.0137725	-6.23993	0.828633
1612	ALG12	HGLibA_01612	TCCGCGTGCAGTAGAACATC	32.2513	26.8995	0.492471	0.476165		0.0147642	0.0177016	-6.08175	-5.81998	0.00835493	20770	0.0496432	0.0162329	-5.95086	1.30414
1613	ALG12	HGLibA_01613	ACGAGTGGGCCCGCTTCATC	5.2783	4.17961	0.0820784	0.0952331		0.0180424	0.0227852	-5.79247	-5.45576	0.013729	27107	0.0625047	0.0204138	-5.62411	1.20409
1614	ALG12	HGLibA_01614	CAGCGAAAGCACGTAAACCG	14.5824	14.2	0.205196	0.333316		0.0228574	0.023473	-5.4512	-5.41285	0.000203871	2578	0.00975948	0.0231652	-5.43202	2.01057
1615	ALG13	HGLibA_01615	CAGTACTGAGTCGTTTACTC	24.6917	12.5924	0.246235	0.285699		0.0115707	0.0226882	-6.43338	-5.46191	0.0934394	67654	0.170447	0.0171294	-5.94765	0.76841
1616	ALG13	HGLibA_01616	GATCTTGTTATTAGTCACGC	5.50195	5.67998	0.123118	0.0952331		0.017309	0.0167664	-5.85234	-5.89828	0.00027005	3162	0.0105399	0.0170377	-5.87531	1.97716
1617	ALG13	HGLibA_01617	GAAGAATATCTTTATCGTGC	1.83398	1.01811	0.0410392	0.0476165		0.0259634	0.0467695	-5.26737	-4.41829	0.0772107	62080	0.15349	0.0363665	-4.84283	0.81392
1618	ALG14	HGLibA_01618	GTTCCATGGACGTTACGCCC	10.154	11.3064	0.410392	0.14285		0.0140683	0.0126344	-6.15141	-6.3065	0.00318653	12878	0.0305368	0.0133514	-6.22895	1.51518
1619	ALG14	HGLibA_01619	GTAGAAACGTTATCCATGTC	1.69979	0.267924	0.0410392	0.14285		0.0840396	0.533173	-3.57279	-0.907326	0.339923	108293	0.387378	0.308606	-2.24006	0.411865
1620	ALG14	HGLibA_01620	GTGCGTTCTCGTTCTAGCTG	6.44131	5.89432	0.164157	0.0476165		0.00739237	0.00807837	-7.07975	-6.95172	0.00212113	10474	0.0249924	0.00773537	-7.01573	1.60219
1621	ALG1L	HGLibA_01621	CCCGCAGGTTCTTCCAAAAC	1.96818	2.03622	0.0410392	0.0952331		0.0483864	0.0467695	-4.36925	-4.41829	0.000505339	4686	0.0133087	0.047578	-4.39377	1.87587
1622	ALG1L	HGLibA_01622	AGTTGTATGTCCATAACCAA	3.22065	7.23394	0.0820784	0.190466		0.059139	0.0263295	-4.07975	-5.24718	0.126609	76998	0.202927	0.0427342	-4.66346	0.69266
1623	ALG1L	HGLibA_01623	TTTGAACAACTTACTCTTGA	2.77334	3.91169	0.0820784	0.14285		0.0515081	0.0365187	-4.27906	-4.77522	0.0297562	39655	0.0926048	0.0440134	-4.52714	1.03337
1624	ALG2	HGLibA_01624	TACCACGTCGAACTCCTCGT	44.6866	45.0648	0.697667	0.714248		0.0159835	0.0158494	-5.96727	-5.97943	1.83633e-05	351	0.00645651	0.0159164	-5.97335	2.19
1625	ALG2	HGLibA_01625	CGACGTGGTAGTGTGCGACC	10.0645	14.6822	0.328314	0.238083		0.0236556	0.0162157	-5.40168	-5.94646	0.0346003	42740	0.0999079	0.0199356	-5.67407	1.0004
1626	ALG2	HGLibA_01626	AGGGTTCATCTGATCGTGGC	2.2813	9.05582	0.0820784	0.0952331		0.0417451	0.0105162	-4.58225	-6.57124	0.241251	98182	0.303243	0.0261307	-5.57674	0.518209
1627	ALG3	HGLibA_01627	GGAGCCGCGCTACACGCTGC	1.07355	2.78641	0.123118	0.0952331		0.0887084	0.0341777	-3.49478	-4.8708	0.167415	86092	0.239985	0.0614431	-4.18279	0.619815
1628	ALG3	HGLibA_01628	CTGCGGAAACGCGGCCGGTC	1.4314	1.44679	0.0410392	0.0952331		0.0665313	0.0658238	-3.90982	-3.92525	0.000421875	4218	0.0123433	0.0661775	-3.91753	1.90857
1629	ALG3	HGLibA_01629	GCCTACATGGCCGAGGTAGA	2.997	4.87621	0.0820784	0.0476165		0.0158881	0.00976507	-5.97591	-6.67815	0.0541717	52910	0.126354	0.0128266	-6.32703	0.898411
1630	ALG5	HGLibA_01630	CAGGGTATATTCAGTTCTCG	17.4899	3.64376	0.287275	0.0952331		0.00544502	0.0261359	-7.52085	-5.25782	0.272724	102106	0.32963	0.0157905	-6.38934	0.481974
1631	ALG5	HGLibA_01631	AGCAGTTGTAAATGCAACGA	6.21765	4.60829	0.164157	0.285699		0.0459497	0.0619968	-4.4438	-4.01166	0.0233501	35179	0.0819143	0.0539732	-4.22773	1.08664
1632	ALG5	HGLibA_01632	CACAACGACAGAAAGTTGTT	0.760432	3.42942	0.0410392	0.0476165		0.0626177	0.0138847	-3.99729	-6.17036	0.264197	101048	0.322667	0.0382512	-5.08382	0.491246
1633	ALG6	HGLibA_01633	GCTGGTAAACCGCCTATGTT	2.41549	1.7683	0.0410392	0.0476165		0.019713	0.0269279	-5.66471	-5.21475	0.0240806	35753	0.0831205	0.0233204	-5.43973	1.08029
1634	ALG6	HGLibA_01634	AAGCTCTTCATGCGTACAAC	17.3558	15.0573	0.246235	0.190466		0.0109742	0.0126494	-6.50974	-6.30479	0.0051299	16419	0.0385582	0.0118118	-6.40726	1.41388
1635	ALG6	HGLibA_01635	TCTCATATCCACGTGATGTA	18.2951	19.0226	0.451431	0.285699		0.0156162	0.0150189	-6.00082	-6.05707	0.000415764	4180	0.0122751	0.0153175	-6.02894	1.91098
1636	ALG8	HGLibA_01636	AAACCAATTGCCAGTACCCG	1.5656	0.214339	0.0410392	0.0476165		0.0304143	0.222155	-5.03911	-2.17036	0.337253	108115	0.384967	0.126285	-3.60473	0.414577
1637	ALG8	HGLibA_01637	GGCGGCGCTCACAATTGCCA	3.13119	1.44679	0.0410392	0.0476165		0.0152072	0.0329119	-6.03911	-4.92525	0.116654	74391	0.193523	0.0240595	-5.48218	0.713268
1638	ALG8	HGLibA_01638	AACCAAACCACTTGTCATTG	18.9661	9.4845	0.287275	0.380932		0.0200849	0.0401637	-5.63774	-4.63797	0.099416	69484	0.176573	0.0301243	-5.13785	0.753075
1639	ALG9	HGLibA_01639	GTCCATATACCATCCAGTCA	7.51486	4.76904	0.0820784	0.0952331		0.0126726	0.019969	-6.30214	-5.64609	0.047784	49903	0.118171	0.0163208	-5.97412	0.92749
1640	ALG9	HGLibA_01640	ACTACGTTGATAGCCATGAC	13.5983	15.6467	0.287275	0.380932		0.0280132	0.0243458	-5.15775	-5.36018	0.00510954	16395	0.0384613	0.0261795	-5.25897	1.41498
1641	ALG9	HGLibA_01641	TCGAATGATGCTAGCCTTCT	0.0447313	0.0535848	0.0410392	0.0476165		1.0645	0.888621	0.0901775	-0.17036	0.473465	117293	0.498161	0.976561	-0.0400912	0.30263
1642	ALK	HGLibA_01642	AATGGGACAGTCCTCCAGCT	8.58841	11.0385	0.164157	0.190466		0.0221771	0.0172548	-5.49478	-5.85686	0.0157818	29002	0.0671558	0.0197159	-5.67582	1.17292
1643	ALK	HGLibA_01643	TGTCCCATTCCAACAAGTGA	3.44431	5.19772	0.164157	0.14285		0.0414741	0.0274831	-4.59165	-5.18531	0.0415233	46655	0.109837	0.0344786	-4.88848	0.959252
1644	ALK	HGLibA_01644	TCACATGGAGAGCTCTTGAT	8.1411	6.69809	0.123118	0.14285		0.0175467	0.0213269	-5.83265	-5.55118	0.00966437	22570	0.052844	0.0194368	-5.69192	1.277
1645	ALKBH1	HGLibA_01645	AGAAGTCGATGACCCCTTCC	10.0198	17.5222	0.451431	0.190466		0.0190089	0.01087	-5.71718	-6.52351	0.0698205	59319	0.145259	0.0149395	-6.12034	0.837857
1646	ALKBH1	HGLibA_01646	ACCCTTGCCACGGGCTGCGT	13.0168	30.1682	0.656627	0.285699		0.0219485	0.00947021	-5.50974	-6.72239	0.132844	78435	0.209019	0.0157093	-6.11606	0.679813
1647	ALKBH1	HGLibA_01647	AGGATAGCCTTTGAGTCCAT	8.36476	8.30564	0.164157	0.14285		0.0170776	0.0171991	-5.87175	-5.86152	1.47479e-05	274	0.00664251	0.0171383	-5.86664	2.17767
1648	ALKBH2	HGLibA_01648	CAGGCAACGTATGGCGACGC	18.7872	15.7003	0.328314	0.380932		0.0202762	0.0242627	-5.62407	-5.36512	0.00825037	20621	0.0493762	0.0222694	-5.49459	1.30648
1649	ALKBH2	HGLibA_01649	TGTGCCACTTCCCGAATACC	10.1093	6.37659	0.0820784	0.190466		0.0188407	0.0298696	-5.73	-5.06518	0.0491681	50553	0.12003	0.0243552	-5.39759	0.920709
1650	ALKBH2	HGLibA_01650	TCCCACGGGAATCCTTATGC	3.48904	5.14414	0.0410392	0.0952331		0.0272949	0.0185129	-5.19522	-5.75532	0.0359474	43570	0.10182	0.0229039	-5.47527	0.992166
1651	ALKBH3	HGLibA_01651	TCTTTCACGTCAACAAAGCC	7.47013	11.6815	0.164157	0.238083		0.0318713	0.0203812	-4.9716	-5.61662	0.0469415	49449	0.117153	0.0261263	-5.29411	0.931247
1652	ALKBH3	HGLibA_01652	AGCTTTGTCAAGATGTTCCC	10.8697	13.3426	0.123118	0.14285		0.013142	0.0107063	-6.24967	-6.5454	0.0104974	23604	0.0548843	0.0119241	-6.39754	1.26055
1653	ALKBH3	HGLibA_01653	TGCTTACCTAGATACACCTG	23.1708	17.6294	0.205196	0.14285		0.00616506	0.00810293	-7.34167	-6.94734	0.0182556	31272	0.0720433	0.007134	-7.1445	1.14241
1654	ALKBH4	HGLibA_01654	GCCCGTCGAGCAGTGCAACC	5.18883	6.05508	0.164157	0.14285		0.0275302	0.0235917	-5.18284	-5.40558	0.00621856	18146	0.0422924	0.025561	-5.29421	1.37374
1655	ALKBH4	HGLibA_01655	CGGTTCACACGGGTCTTCCC	6.5755	6.16225	0.0820784	0.14285		0.0217245	0.0231814	-5.52453	-5.43089	0.00111249	7396	0.0185631	0.022453	-5.47771	1.73135
1656	ALKBH4	HGLibA_01656	CCGAGACCCCCGAAGTCCTT	1.5656	2.73282	0.0820784	0.0952331		0.0608286	0.0348479	-4.03911	-4.84279	0.0717075	60079	0.147298	0.0478383	-4.44095	0.831804
1657	ALKBH5	HGLibA_01657	CCACCGTGTGCTCGTTGTAC	34.1747	30.0075	0.574549	0.428549		0.0125399	0.0142814	-6.31733	-6.12972	0.00432774	15058	0.0354689	0.0134107	-6.22352	1.45015
1658	ALKBH5	HGLibA_01658	ACTGGTTCCGACACCCGAAT	8.40949	6.00149	0.164157	0.14285		0.0169867	0.0238023	-5.87945	-5.39275	0.0279358	38422	0.0897294	0.0203945	-5.6361	1.04707
1659	ALKBH5	HGLibA_01659	TATGCTTCAGATCGCCTGTC	15.7454	3.00075	0.0410392	0.190466		0.0120966	0.0634729	-6.36925	-3.97771	0.28348	103376	0.338421	0.0377848	-5.17348	0.470543
1660	ALKBH6	HGLibA_01660	CTCGTGAACCAGTATCTGCC	8.23056	1.92905	0.0820784	0.190466		0.0231413	0.0987357	-5.43338	-3.34028	0.257253	100279	0.316595	0.0609385	-4.38683	0.499496
1661	ALKBH6	HGLibA_01661	ACACTTTGTCCACGTAGCGC	9.75143	25.935	0.369353	0.285699		0.0292982	0.011016	-5.09304	-6.50426	0.162836	85120	0.236087	0.0201571	-5.79865	0.626928
1662	ALKBH6	HGLibA_01662	AGCCCTGGAACCGTTCAGAG	2.90754	1.23245	0.0410392	0.0952331		0.0327539	0.0772714	-4.93219	-3.69392	0.139482	80015	0.21513	0.0550126	-4.31306	0.667299
1663	ALKBH7	HGLibA_01663	GCCGCTACGAATACGATCAC	13.5983	6.37659	0.0410392	0.14285		0.0105049	0.0224022	-6.57279	-5.48022	0.111368	72891	0.188556	0.0164536	-6.0265	0.72456
1664	ALKBH7	HGLibA_01664	GTGCACCAGCCGCATAACGC	18.6977	14.3607	0.328314	0.380932		0.0203732	0.026526	-5.61718	-5.23645	0.0175061	30648	0.0704922	0.0234496	-5.42682	1.15186
1665	ALKBH7	HGLibA_01665	CCCAGTGATCGTATTCGTAG	9.7067	9.21658	0.287275	0.190466		0.0196221	0.0206656	-5.67137	-5.59662	0.000732759	5821	0.0155352	0.0201439	-5.634	1.80868
1666	ALKBH8	HGLibA_01666	TCTTCTACTACCATGAGTCC	3.75743	11.9494	0.205196	0.14285		0.0380179	0.0119545	-4.71718	-6.3863	0.201661	92371	0.269426	0.0249862	-5.55174	0.56956
1667	ALKBH8	HGLibA_01667	GACAGTATCCTATGCCACTC	6.30712	9.69884	0.205196	0.0952331		0.0150993	0.00981902	-6.04937	-6.67021	0.0436524	47775	0.112762	0.0124592	-6.35979	0.947839
1668	ALKBH8	HGLibA_01668	AATTACTTACCCCCAGATAA	0.536776	1.12528	0.0410392	0.0476165		0.0887084	0.0423153	-3.49478	-4.56268	0.11606	74220	0.192982	0.0655119	-4.02873	0.714484
1669	ALLC	HGLibA_01669	GACATGGCATCTGAATCCGT	4.83098	4.98338	0.246235	0.238083		0.0492825	0.0477753	-4.34278	-4.38759	0.000267468	3136	0.0105257	0.0485289	-4.36519	1.97775
1670	ALLC	HGLibA_01670	TCCTGCAGAAAACCTCATAA	1.4314	1.33962	0.0410392	0.0476165		0.0332657	0.0355448	-4.90982	-4.81422	0.00117476	7593	0.0190937	0.0344052	-4.86202	1.71911
1671	ALLC	HGLibA_01671	CTTCAAAGAGCATGAATATA	1.78925	3.10792	0.0410392	0.0476165		0.0266125	0.0153211	-5.23175	-6.02834	0.0676628	58524	0.142682	0.0209668	-5.63005	0.84563
1672	ALMS1	HGLibA_01672	GCCCCCGCAGCACCGCTACT	6.62023	5.84074	0.205196	0.0952331		0.0143852	0.016305	-6.11928	-5.93854	0.00416447	14776	0.0347822	0.0153451	-6.02891	1.45864
1673	ALMS1	HGLibA_01673	TCCGCTCGCCCTCCGAGTAG	29.8805	15.3788	0.451431	0.428549		0.0143421	0.0278662	-6.1236	-5.16534	0.092241	67288	0.169177	0.0211041	-5.64447	0.77166
1674	ALMS1	HGLibA_01674	TTCTCACATTAAACCTAGTC	1.02882	2.25056	0.0410392	0.0952331		0.0925653	0.0423153	-3.43338	-4.56268	0.123877	76297	0.200372	0.0674403	-3.99803	0.698162
1675	ALOX12	HGLibA_01675	CGTACAACCGCGTGCAGCTT	13.2405	9.10941	0.205196	0.14285		0.0107889	0.0156815	-6.53431	-5.99479	0.0334999	42161	0.0980589	0.0132352	-6.26455	1.00851
1676	ALOX12	HGLibA_01676	TGGCCTTCCCGTGCTACCGC	46.8337	28.2928	0.861824	0.523782		0.0111839	0.0185129	-6.48244	-5.75532	0.0578105	54503	0.1309	0.0148484	-6.11888	0.88306
1677	ALOX12	HGLibA_01677	GACCATCGCTGCAGACCGTA	20.7106	18.0581	0.246235	0.285699		0.0137948	0.0158211	-6.17973	-5.982	0.00477898	15855	0.0371983	0.014808	-6.08087	1.42948
1678	ALOX12B	HGLibA_01678	GGCCGGGGTTGACGCCGTTG	2.05764	1.71471	0.123118	0.14285		0.069424	0.0833082	-3.84842	-3.5854	0.00946074	22317	0.0523171	0.0763661	-3.71691	1.28136
1679	ALOX12B	HGLibA_01679	GTTCCCCGTCACAGACGACA	4.47313	4.17961	0.0410392	0.0476165		0.010645	0.0113926	-6.55368	-6.45576	0.00117319	7587	0.0190832	0.0110188	-6.50472	1.71935
1680	ALOX12B	HGLibA_01680	GATGATGCCCATCGCCATCC	8.23056	24.8097	0.164157	0.285699		0.034712	0.0115156	-4.84842	-6.44027	0.188253	89972	0.258219	0.0231138	-5.64434	0.588011
1681	ALOX15	HGLibA_01681	GTTGGAACCGGCATAGAGCG	0.0447313	1.17886	0.0410392	0.0476165		1.0645	0.0403919	0.0901775	-4.62979	0.422382	116043	0.449201	0.552447	-2.26981	0.347559
1682	ALOX15	HGLibA_01682	ACCTCCTTAAGGACGACGCC	13.9114	21.166	0.328314	0.14285		0.0102685	0.00674902	-6.60563	-7.21111	0.0412707	46527	0.109469	0.00850876	-6.90837	0.960709
1683	ALOX15	HGLibA_01683	CTATGCCGGTTCCAACAACC	5.8598	6.21583	0.0820784	0.0952331		0.0162519	0.0153211	-5.94325	-6.02834	0.000895385	6540	0.0168961	0.0157865	-5.98579	1.77221
1684	ALOX15B	HGLibA_01684	GGTTCCAGCTGACACCGCCG	0.805164	2.73282	0.0410392	0.0476165		0.059139	0.0174239	-4.07975	-5.84279	0.215447	94488	0.281396	0.0382814	-4.96127	0.550682
1685	ALOX15B	HGLibA_01685	GCCAGCCTGTAGATAAAAGT	1.38667	1.60754	0.0410392	0.0952331		0.0686775	0.0592414	-3.86402	-4.07725	0.00627281	18214	0.0425022	0.0639594	-3.97063	1.37159
1686	ALOX15B	HGLibA_01686	AAGAGGAGGTGGCCGCCCCG	1.52086	3.48301	0.0410392	0.190466		0.125235	0.0546844	-2.99729	-4.19273	0.136146	79188	0.212177	0.0899599	-3.59501	0.673301
1687	ALOX5	HGLibA_01687	GGATTCATACGACGTGACTG	9.34884	6.26942	0.246235	0.190466		0.0203732	0.0303802	-5.61718	-5.04072	0.0387793	45158	0.105979	0.0253767	-5.32895	0.974781
1688	ALOX5	HGLibA_01688	GAATCGAGAAGCGCAAGTAC	3.84689	2.08981	0.0410392	0.190466		0.0495117	0.0911406	-4.33609	-3.45576	0.0837156	64426	0.160361	0.0703261	-3.89592	0.794901
1689	ALOX5	HGLibA_01689	GCAACACCGACGTAAAGAAC	9.52777	8.7879	0.164157	0.0952331		0.00999532	0.0108368	-6.64453	-6.52791	0.00168929	9354	0.0222875	0.0104161	-6.58622	1.65194
1690	ALOX5AP	HGLibA_01690	GGTACGCATCTACACAGTTC	1.78925	4.34037	0.0820784	0.0476165		0.0266125	0.0109706	-5.23175	-6.51021	0.143024	80892	0.218201	0.0187916	-5.87098	0.661143
1691	ALOX5AP	HGLibA_01691	TTAGTTCCTGCTGCGTTTGC	11.3618	7.93054	0.451431	0.333316		0.0293366	0.0420294	-5.09115	-4.57246	0.0327319	41664	0.0969536	0.035683	-4.83181	1.01344
1692	ALOX5AP	HGLibA_01692	CATCGTCACCCTCATCAGCG	12.8379	16.0218	0.328314	0.190466		0.0148363	0.0118879	-6.07473	-6.39436	0.0124101	25730	0.0595236	0.0133621	-6.23455	1.22531
1693	ALOXE3	HGLibA_01693	CCACACTCGATACACGCTGC	0.805164	4.44753	0.0410392	0.0476165		0.059139	0.0107063	-4.07975	-6.5454	0.292006	104227	0.345753	0.0349226	-5.31257	0.461234
1694	ALOXE3	HGLibA_01694	GGGTCGCGGACCTTGTAGAT	7.15701	2.67924	0.0410392	0.14285		0.0199594	0.0533173	-5.64679	-4.22925	0.163944	85366	0.237009	0.0366383	-4.93802	0.625235
1695	ALOXE3	HGLibA_01695	AGCAAAAATCTCGCCAGTCC	4.78625	4.82263	0.0820784	0.190466		0.0397944	0.0394943	-4.65129	-4.66221	0.000149922	2019	0.00916396	0.0396443	-4.65675	2.03792
1696	ALPI	HGLibA_01696	CATGGACCGCTTCCCATACC	24.1549	25.3456	0.205196	0.666632		0.0275982	0.0263017	-5.17928	-5.2487	0.000688851	5638	0.0150784	0.0269499	-5.21399	1.82165
1697	ALPI	HGLibA_01697	AGCTGCCTGGCGGTTCCAGA	1.61033	1.12528	0.0410392	0.0952331		0.059139	0.0846306	-4.07975	-3.56268	0.0334946	42154	0.0980596	0.0718848	-3.82121	1.00851
1698	ALPI	HGLibA_01698	TGAGGTTCTTGGCGACCTTC	17.8031	20.9516	0.328314	0.238083		0.0133731	0.0113634	-6.22452	-6.45946	0.00673472	18844	0.0441063	0.0123683	-6.34199	1.3555
1699	ALPK1	HGLibA_01699	CAGAGACGTCGAGCCCATAC	11.2276	14.8966	0.328314	0.428549		0.0381694	0.0287683	-4.71144	-5.11938	0.0202997	32951	0.0760283	0.0334688	-4.91541	1.11902
1700	ALPK1	HGLibA_01700	AGCCACGCCAATTGCCCCGC	7.60432	9.8596	0.246235	0.190466		0.0250471	0.0193178	-5.31921	-5.69392	0.0171049	30232	0.0698245	0.0221825	-5.50657	1.15599
1701	ALPK1	HGLibA_01701	TCGGTCTGTATACAGATCAG	3.08646	9.37733	0.205196	0.190466		0.0617102	0.0203113	-4.01835	-5.62157	0.195083	91240	0.263869	0.0410108	-4.81996	0.578612
1702	ALPK2	HGLibA_01702	GATAACCCTAACCTACACCG	1.65506	9.16299	0.0410392	0.0476165		0.0287703	0.00519661	-5.11928	-7.58821	0.289207	103943	0.343374	0.0169835	-6.35374	0.464232
1703	ALPK2	HGLibA_01703	AATAATGCCACTCCCATCGA	3.84689	1.66113	0.0410392	0.0476165		0.0123779	0.0286652	-6.33609	-5.12456	0.131369	78109	0.20756	0.0205216	-5.73032	0.682856
1704	ALPK2	HGLibA_01704	GTGCTTCGCTGCATAATATC	4.24947	3.21509	0.0820784	0.0952331		0.0224106	0.0296207	-5.47968	-5.07725	0.0195623	32381	0.0745562	0.0260156	-5.27846	1.12752
1705	ALPK3	HGLibA_01705	GTCTGCAGTAGCGCCGCGTC	0.447313	1.66113	0.0410392	0.14285		0.31935	0.0859956	-1.64679	-3.53959	0.254884	99973	0.31464	0.202673	-2.59319	0.502186
1706	ALPK3	HGLibA_01706	CCGATACACACCGCAGTCTA	20.9343	15.3252	0.574549	0.380932		0.0181966	0.0248565	-5.78019	-5.33023	0.0243528	35932	0.0836413	0.0215266	-5.55521	1.07758
1707	ALPK3	HGLibA_01707	CCGTAGACTGCGGTGTGTAT	0.67097	0.375093	0.0410392	0.0476165		0.0709667	0.126946	-3.81671	-2.97771	0.0837268	64428	0.160378	0.0989563	-3.39721	0.794856
1708	ALPL	HGLibA_01708	TGGCGGTGCCGGCACTGTCA	5.09937	3.10792	0.164157	0.0476165		0.00933773	0.0153211	-6.74271	-6.02834	0.0569806	54138	0.129891	0.0123294	-6.38553	0.886422
1709	ALPL	HGLibA_01709	GTTGCACCGGGAACGCTCAG	2.54968	1.17886	0.0410392	0.14285		0.0560264	0.121176	-4.15775	-3.04483	0.123201	76156	0.199647	0.088601	-3.60129	0.699737
1710	ALPL	HGLibA_01710	GGTGGCATGGTTCACTCTCG	3.53377	4.17961	0.0410392	0.0952331		0.0269494	0.0227852	-5.2136	-5.45576	0.00723688	19507	0.0457841	0.0248673	-5.33468	1.33929
1711	ALPP	HGLibA_01711	CATGGACCGCTTCCCATATG	19.816	25.292	0.205196	0.285699		0.0144176	0.011296	-6.11602	-6.46804	0.0147347	28073	0.0647749	0.0128568	-6.29203	1.18859
1712	ALPP	HGLibA_01712	CGAGGCGTGCTGCACTCGTG	24.2444	22.1841	0.328314	0.333316		0.0137482	0.015025	-6.18462	-6.05649	0.0020204	10230	0.0243733	0.0143866	-6.12055	1.61308
1713	ALPP	HGLibA_01713	TCCATGGCCAGGGGTATCTC	9.5725	12.2709	0.164157	0.14285		0.0149229	0.0116413	-6.06633	-6.4246	0.0153396	28607	0.0661751	0.0132821	-6.24546	1.17931
1714	ALPPL2	HGLibA_01714	CATGGACCGCTTCCCGTACG	3.22065	8.68073	0.0820784	0.0476165		0.0147847	0.00548531	-6.07975	-7.51021	0.163844	85343	0.236929	0.010135	-6.79498	0.625382
1715	ALPPL2	HGLibA_01715	GGATGCCGACGTGCCTGCCT	4.78625	3.37584	0.0410392	0.0476165		0.00994861	0.0141051	-6.65129	-6.14764	0.0291902	39238	0.0918089	0.0120269	-6.39946	1.03712
1716	ALPPL2	HGLibA_01716	CACCGTGTGGGCGTAGGCGC	46.7442	49.6195	0.615588	0.809481		0.0173172	0.0163138	-5.85165	-5.93777	0.00092011	6632	0.0171218	0.0168155	-5.89471	1.76645
1717	ALS2	HGLibA_01717	GAACTCCATGTTTCACTCCG	8.32002	4.44753	0.164157	0.238083		0.0286156	0.0535314	-5.12705	-4.22347	0.0856904	65133	0.162362	0.0410735	-4.67526	0.789515
1718	ALS2	HGLibA_01718	GGCACGGCGATGTTCTGCCT	17.2216	10.7705	0.369353	0.380932		0.0221195	0.035368	-5.49854	-4.82141	0.0517618	51775	0.123379	0.0287438	-5.15997	0.908757
1719	ALS2	HGLibA_01719	GTGGCTGCTACTTATGAAGC	1.07355	2.62565	0.0410392	0.0476165		0.0443542	0.0181351	-4.49478	-5.78507	0.145517	81453	0.220476	0.0312447	-5.13993	0.656638
1720	ALS2CL	HGLibA_01720	CTACACGCAGCGAGTACTGG	104.582	48.4406	1.76469	1.1428		0.0109273	0.0235917	-6.51592	-5.40558	0.116037	74202	0.192989	0.0172595	-5.96075	0.714467
1721	ALS2CL	HGLibA_01721	GCACGTACTGTTGCACGTGA	29.7463	16.3434	0.164157	0.333316		0.0112053	0.0203946	-6.47968	-5.61567	0.0766316	61883	0.152824	0.0157999	-6.04767	0.81581
1722	ALS2CL	HGLibA_01722	GTGAACGCAGTCACCCTCTT	29.4332	34.2942	0.451431	0.666632		0.022649	0.0194386	-5.46441	-5.68493	0.00598573	17791	0.0415212	0.0210438	-5.57467	1.38173
1723	ALS2CR11	HGLibA_01723	AGCACACTTGATAACCGCAG	0.805164	7.50187	0.0410392	0.0476165		0.059139	0.00634729	-4.07975	-7.29964	0.344589	108667	0.391343	0.0327431	-5.6897	0.407442
1724	ALS2CR11	HGLibA_01724	CCGCCACCCCGCTATTGCAG	1.02882	3.48301	0.0410392	0.0476165		0.0462827	0.0136711	-4.43338	-6.19273	0.213285	94152	0.279566	0.0299769	-5.31306	0.553515
1725	ALS2CR11	HGLibA_01725	ATTGTTGTAGGTTGGCTGCC	14.2693	7.55545	0.164157	0.380932		0.026696	0.0504182	-5.22724	-4.30991	0.0868606	65527	0.16359	0.0385571	-4.76857	0.786244
1726	ALS2CR12	HGLibA_01726	GAATCGGAGATCCCGGACAA	0.402582	0.160754	0.0410392	0.0476165		0.118278	0.296207	-3.07975	-1.75532	0.188751	90064	0.258638	0.207242	-2.41753	0.587307
1727	ALS2CR12	HGLibA_01727	TTCCGAACAAGTTGATAGCC	4.07055	3.91169	0.0820784	0.0952331		0.0233956	0.0243458	-5.41762	-5.36018	0.00041687	4191	0.0122754	0.0238707	-5.3889	1.91096
1728	ALS2CR12	HGLibA_01728	AGTTCTTGCGTGGTAGTTGA	11.6301	18.7547	0.246235	0.380932		0.0327539	0.0203113	-4.93219	-5.62157	0.052838	52287	0.124711	0.0265326	-5.27688	0.904094
1729	ALS2CR8	HGLibA_01729	TTGACTCTTCACCGTCATTA	11.4512	5.73357	0.0820784	0.0476165		0.00415821	0.00830487	-7.90982	-6.91183	0.0964138	68548	0.173579	0.00623154	-7.41082	0.760502
1730	ALS2CR8	HGLibA_01730	CATGATTTAGTGCCCCCAAA	1.74452	4.82263	0.0820784	0.190466		0.10918	0.0394943	-3.19522	-4.66221	0.177685	88094	0.24892	0.0743369	-3.92872	0.603941
1731	ALS2CR8	HGLibA_01731	TGGGGGTAGTAGAATGCTTG	1.92345	0.964526	0.0410392	0.0952331		0.0495117	0.0987357	-4.33609	-3.34028	0.103295	70637	0.180468	0.0741237	-3.83819	0.7436
1732	ALX1	HGLibA_01732	CGCCGAGCATCACGTGCGCT	1.16301	7.50187	0.123118	0.0952331		0.0818847	0.0126946	-3.61026	-6.29964	0.314236	106192	0.365189	0.0472896	-4.95495	0.437482
1733	ALX1	HGLibA_01733	CATTCGAAGAACTGCGATAC	14.0009	16.3969	0.410392	0.428549		0.0306087	0.0261359	-5.02992	-5.25782	0.00650698	18531	0.0433346	0.0283723	-5.14387	1.36317
1734	ALX1	HGLibA_01734	AGGTCCTCTGGAGCACGTTA	7.15701	3.96527	0.0820784	0.14285		0.0199594	0.0360252	-5.64679	-4.79485	0.076144	61700	0.152302	0.0279923	-5.22082	0.817296
1735	ALX3	HGLibA_01735	GCACTGCGCGCCTTTCCGCG	3.53377	1.50037	0.0410392	0.14285		0.0404241	0.0952094	-4.62864	-3.39275	0.1401	80193	0.215604	0.0678167	-4.0107	0.666343
1736	ALX3	HGLibA_01736	CGAGCGTTATGGGAAGATCC	6.48604	5.67998	0.205196	0.14285		0.0220242	0.0251496	-5.50477	-5.31332	0.00464728	15623	0.0367104	0.0235869	-5.40904	1.43521
1737	ALX3	HGLibA_01737	ATCACGTGGTCCAGTTCAGA	4.65206	9.75243	0.164157	0.0476165		0.0102356	0.00488253	-6.61026	-7.67815	0.108571	72107	0.185819	0.00755906	-7.14421	0.730911
1738	ALX4	HGLibA_01738	CGTCTCTTACTGCGAGTCGC	9.39358	17.4686	0.205196	0.190466		0.0202762	0.0109033	-5.62407	-6.51909	0.0818258	63762	0.158373	0.0155898	-6.07158	0.800318
1739	ALX4	HGLibA_01739	CCGCAAGACCTCGAGCATCG	3.89162	12.9675	0.246235	0.0476165		0.0122356	0.00367199	-6.35277	-8.08922	0.20959	93606	0.276325	0.00795382	-7.22099	0.558579
1740	ALX4	HGLibA_01740	CCGTTACGGCGCTGGGCAGC	2.23657	4.50112	0.123118	0.0476165		0.02129	0.0105788	-5.55368	-6.56268	0.101283	70031	0.178484	0.0159344	-6.05818	0.7484
1741	ALYREF	HGLibA_01741	GGGACTCACTCTCGCATTAT	0.805164	2.67924	0.0410392	0.0952331		0.118278	0.0355448	-3.07975	-4.81422	0.216051	94553	0.28199	0.0769114	-3.94698	0.549766
1742	ALYREF	HGLibA_01742	AGTCTCAGACGCCGATATTC	8.90153	3.64376	0.0820784	0.14285		0.0160478	0.0392039	-5.96148	-4.67286	0.143855	81086	0.218944	0.0276258	-5.31717	0.659666
1743	ALYREF	HGLibA_01743	CGTCACAGATTGACGCACAG	6.66497	5.03697	0.0410392	0.0952331		0.0142886	0.0189068	-6.12899	-5.72495	0.0192644	32122	0.0740128	0.0165977	-5.92697	1.13069
1744	AMACR	HGLibA_01744	GTCCTGTAAGTCGTATAGAA	1.34194	1.66113	0.0820784	0.0476165		0.0354834	0.0286652	-4.81671	-5.12456	0.0122547	25560	0.0591691	0.0320743	-4.97063	1.2279
1745	AMACR	HGLibA_01745	CACCTTTCTATACGACTTAC	2.1471	2.4649	0.0410392	0.0476165		0.0221771	0.0193178	-5.49478	-5.69392	0.00490185	16076	0.0376302	0.0207475	-5.59435	1.42446
1746	AMACR	HGLibA_01746	GACCCTTGCCAGTGCGTGTG	15.1639	11.0385	0.164157	0.238083		0.0157006	0.0215685	-5.99304	-5.53493	0.0246352	36134	0.0841383	0.0186345	-5.76398	1.07501
1747	AMBN	HGLibA_01747	AGGCTCAAACTAGCCATACC	10.7355	11.5743	0.205196	0.238083		0.0221771	0.0205699	-5.49478	-5.60332	0.00147047	8641	0.0210013	0.0213735	-5.54905	1.67775
1748	AMBN	HGLibA_01748	GATACTGATCCTATGCCTCC	0.402582	3.37584	0.0410392	0.0952331		0.236556	0.0282102	-2.07975	-5.14764	0.34534	108848	0.391544	0.132383	-3.61369	0.40722
1749	AMBN	HGLibA_01749	TATGGCTAGTTTGAGCCTTG	12.4353	10.2347	0.205196	0.285699		0.0229748	0.0279148	-5.4438	-5.16283	0.00971443	22626	0.0529863	0.0254448	-5.30331	1.27584
1750	AMBP	HGLibA_01750	TTGTCGGGCGGCGTTGGCAC	14.7613	16.6649	0.369353	0.238083		0.0161288	0.0142865	-5.95422	-6.1292	0.00381118	14107	0.033341	0.0152077	-6.04171	1.47702
1751	AMBP	HGLibA_01751	TGCTCACCGCCAACGAGTGC	15.7902	9.8596	0.287275	0.285699		0.0180935	0.0289768	-5.78838	-5.10896	0.0516366	51720	0.123212	0.0235351	-5.44867	0.909347
1752	AMBP	HGLibA_01752	GGCAGGTGGAACCGATGGCC	1.52086	0.696602	0.0410392	0.0476165		0.0313089	0.0683555	-4.99729	-3.8708	0.122894	76071	0.199372	0.0498322	-4.43404	0.700335
1753	AMBRA1	HGLibA_01753	GCAGACATCCGGGCATTGCG	1.69979	0.428678	0.0410392	0.0952331		0.0560264	0.222155	-4.15775	-2.17036	0.25787	100365	0.317083	0.139091	-3.16405	0.498827
1754	AMBRA1	HGLibA_01754	GGTAGTATTGGCAATGTTAC	3.53377	7.50187	0.0410392	0.0952331		0.0269494	0.0126946	-5.2136	-6.29964	0.11094	72770	0.188144	0.019822	-5.75662	0.72551
1755	AMBRA1	HGLibA_01755	ACATTGCCAATACTACCTAC	6.93335	3.32226	0.123118	0.0476165		0.00686775	0.0143326	-7.18595	-6.12456	0.107904	71891	0.185232	0.0106002	-6.65525	0.732283
1756	AMD1	HGLibA_01756	TGACTGATTACCCGACTCTC	5.00991	7.07319	0.0820784	0.0476165		0.00950447	0.00673198	-6.71718	-7.21475	0.0285333	38825	0.0906972	0.00811823	-6.96597	1.04241
1757	AMD1	HGLibA_01757	GTTGTAGAAGTCTTCAAGCC	0.223657	1.28603	0.0410392	0.0476165		0.2129	0.0370259	-2.23175	-4.75532	0.312853	106060	0.364035	0.124963	-3.49354	0.438857
1758	AMD1	HGLibA_01758	GGAATTCGTGACCTGATACC	4.33894	2.62565	0.123118	0.14285		0.0329227	0.0544054	-4.92477	-4.20011	0.059633	55282	0.133124	0.043664	-4.56244	0.875744
1759	AMDHD1	HGLibA_01759	GAACGCGCAGCAAGTGGTGC	12.3458	12.1102	0.123118	0.285699		0.0231413	0.0235917	-5.43338	-5.40558	0.000141741	1945	0.0089935	0.0233665	-5.41948	2.04607
1760	AMDHD1	HGLibA_01760	TGCGCAGCGCATCCCGCGCC	13.151	37.8308	0.451431	0.523782		0.0398283	0.0138454	-4.65006	-6.17445	0.179984	88504	0.250971	0.0268368	-5.41226	0.600376
1761	AMDHD1	HGLibA_01761	AGTTCACGAATTTGCAATGA	1.07355	2.19698	0.0820784	0.0476165		0.0443542	0.0216737	-4.49478	-5.52791	0.107753	71849	0.185081	0.0330139	-5.01135	0.732638
1762	AMDHD2	HGLibA_01762	CAATGTCCGCATCGTGACGC	31.625	35.0444	0.492471	0.428549		0.0135509	0.0122287	-6.20546	-6.35358	0.00269476	11815	0.0281475	0.0128898	-6.27952	1.55056
1763	AMDHD2	HGLibA_01763	CCCGCAGTCCCGCCGCTCGT	5.63615	2.67924	0.0410392	0.0952331		0.0168968	0.0355448	-5.8871	-4.81422	0.109652	72387	0.186943	0.0262208	-5.35066	0.72829
1764	AMDHD2	HGLibA_01764	TCAGCGCCCGGATCACTTCG	3.04173	3.05433	0.0820784	0.0476165		0.0156544	0.0155898	-5.99729	-6.00325	3.78215e-05	704	0.0066301	0.0156221	-6.00027	2.17848
1765	AMELX	HGLibA_01765	ATACCGGTGGCCTTATGCTC	0.760432	6.21583	0.0820784	0.0476165		0.0626177	0.00766053	-3.99729	-7.02834	0.336256	108042	0.384088	0.0351391	-5.51281	0.415569
1766	AMELX	HGLibA_01766	CAACCAATGATGCCCGTTCC	8.76734	17.415	0.205196	0.333316		0.0380179	0.0191395	-4.71718	-5.7073	0.0974086	68864	0.174566	0.0285787	-5.21224	0.758041
1767	AMELX	HGLibA_01767	CAAGCTTCCAGAGTCAGATC	0.402582	2.57207	0.0410392	0.0476165		0.118278	0.0185129	-3.07975	-5.75532	0.314844	106232	0.365758	0.0683954	-4.41753	0.436806
1768	AMELY	HGLibA_01768	GGGTTGGAGTCATGGATTGC	0.0447313	0.0535848	0.0410392	0.0476165		1.0645	0.888621	0.0901775	-0.17036	0.473465	117294	0.498157	0.976561	-0.0400912	0.302634
1769	AMELY	HGLibA_01769	CTGGTGGTCTTATCATGCTC	3.04173	8.89507	0.0410392	0.0952331		0.0313089	0.0107063	-4.99729	-6.5454	0.181351	88745	0.252191	0.0210076	-5.77134	0.598271
1770	AMELY	HGLibA_01770	CATACTTCCTGATCTGCATC	44.8208	33.3833	0.410392	0.761865		0.016998	0.0228217	-5.87849	-5.45345	0.0213618	33744	0.0781259	0.0199099	-5.66597	1.10721
1771	AMER1	HGLibA_01771	TTAGCAGTATCCGCCGTCAC	23.5287	23.5237	0.246235	0.666632		0.0283327	0.0283387	-5.14139	-5.14108	8.30191e-05	1330	0.00770336	0.0283357	-5.14123	2.11332
1772	AMER1	HGLibA_01772	TACCATAGTCGATTCTACCA	4.47313	7.55545	0.164157	0.0952331		0.02129	0.0126046	-5.55368	-6.30991	0.0622821	56332	0.136446	0.0169473	-5.93179	0.865038
1773	AMER1	HGLibA_01773	GAGCAGCCTCCCTCGATACT	14.5377	7.71621	0.205196	0.0952331		0.00655078	0.012342	-7.25412	-6.34028	0.0845121	64724	0.161142	0.00944637	-6.7972	0.792792
1774	AMER2	HGLibA_01774	AGCGGCCAAGGACGCGTCCT	14.3588	9.8596	0.287275	0.14285		0.00994861	0.0144884	-6.65129	-6.10896	0.0339931	42421	0.0988926	0.0122185	-6.38012	1.00484
1775	AMER2	HGLibA_01775	CGACGGACTTGCCGAGGTGC	22.7682	24.5954	0.328314	0.190466		0.00836543	0.00774397	-6.90134	-7.01271	0.00152651	8829	0.0213375	0.0080547	-6.95703	1.67086
1776	AMER2	HGLibA_01776	TGACTGTGCCGCCGAAACGC	29.8805	21.9698	0.410392	0.523782		0.0175292	0.023841	-5.8341	-5.39041	0.0233037	35145	0.0818306	0.0206851	-5.61225	1.08708
1777	AMER3	HGLibA_01777	CCGTGAGCGAGTCGAAGCTC	6.39658	5.6264	0.205196	0.0952331		0.0148881	0.0169261	-6.06969	-5.88461	0.00437567	15166	0.0356064	0.0159071	-5.97715	1.44847
1778	AMER3	HGLibA_01778	ATCCGTGTCCACAAGTGACG	19.145	23.8988	0.328314	0.380932		0.0198972	0.0159394	-5.65129	-5.97126	0.0123772	25692	0.0594537	0.0179183	-5.81127	1.22582
1779	AMER3	HGLibA_01779	ATCGTCAGCTGGCTGCGCCG	0.0447313	0.589432	0.0410392	0.0476165		1.0645	0.0807837	0.0901775	-3.62979	0.422108	115442	0.451246	0.572642	-1.76981	0.345586
1780	AMFR	HGLibA_01780	CGGCGAGCCGGACCAGCTAA	2.23657	1.17886	0.0820784	0.0952331		0.04258	0.0807837	-4.55368	-3.62979	0.0921916	67258	0.169161	0.0616819	-4.09174	0.771699
1781	AMFR	HGLibA_01781	CGCGCGGTAGGCGCTGATGA	2.2813	3.05433	0.0820784	0.0476165		0.0208726	0.0155898	-5.58225	-6.00325	0.0213872	33755	0.0781932	0.0182312	-5.79275	1.10683
1782	AMFR	HGLibA_01782	TGTCTCTCACTCACTCGAAG	0.492044	1.12528	0.0410392	0.0476165		0.0967728	0.0423153	-3.36925	-4.56268	0.13717	79438	0.2131	0.0695441	-3.96597	0.671416
1783	AMH	HGLibA_01783	TCCGACCGCAACCCGCGCTA	3.53377	8.19847	0.0820784	0.14285		0.0404241	0.0174239	-4.62864	-5.84279	0.132467	78331	0.208702	0.028924	-5.23571	0.680474
1784	AMH	HGLibA_01784	AGACGCTCACGCGCCTGGTG	5.1441	6.37659	0.164157	0.0952331		0.0185131	0.0149348	-5.75531	-6.06518	0.0118032	25077	0.0580869	0.0167239	-5.91025	1.23592
1785	AMH	HGLibA_01785	ACGACCACCGCTGCTTCACA	6.08346	8.7879	0.123118	0.285699		0.0469633	0.0325105	-4.41232	-4.94295	0.0333484	42073	0.0978195	0.0397369	-4.67764	1.00957
1786	AMHR2	HGLibA_01786	AACACACAGGTTCGCCTGTT	0.134194	3.96527	0.0820784	0.0952331		0.709667	0.0240168	-0.494785	-5.37981	0.41361	113537	0.44958	0.366842	-2.9373	0.347193
1787	AMHR2	HGLibA_01787	TTTGTGCTTCCCCGCACTCC	15.3876	33.9727	0.328314	0.285699		0.0185669	0.00840966	-5.75112	-6.89374	0.119796	75270	0.196415	0.0134883	-6.32243	0.706825
1788	AMHR2	HGLibA_01788	TGCCGAGACAGTGATGAGCC	12.3906	20.0407	0.205196	0.428549		0.0345867	0.0213839	-4.85364	-5.54733	0.0533395	52543	0.125282	0.0279853	-5.20048	0.902112
1789	AMICA1	HGLibA_01789	TGTCCCCCATCAAGTGTACG	24.3786	16.2362	0.164157	0.333316		0.0136725	0.0205292	-6.19258	-5.60618	0.0388279	45173	0.106077	0.0171008	-5.89938	0.974381
1790	AMICA1	HGLibA_01790	CCAGAACCGCGTACACTTGA	3.53377	7.28753	0.0410392	0.0952331		0.0269494	0.013068	-5.2136	-6.25782	0.104457	70933	0.181738	0.0200087	-5.73571	0.740555
1791	AMICA1	HGLibA_01791	GTTACCTTGGCGTGCTCTCC	11.8538	10.6634	0.287275	0.0952331		0.00803397	0.00893086	-6.95967	-6.80698	0.00295456	12393	0.0294219	0.00848242	-6.88333	1.53133
1792	AMIGO1	HGLibA_01792	CCGGTGCGCCTTCGATGACA	10.0645	8.46639	0.615588	0.190466		0.0189245	0.0224967	-5.7236	-5.47414	0.00859284	21168	0.0500969	0.0207106	-5.59887	1.30019
1793	AMIGO1	HGLibA_01793	GCCCAGTTACACAGCACTAC	14.2693	10.0203	0.123118	0.14285		0.010011	0.014256	-6.64227	-6.13229	0.0298865	39755	0.0927764	0.0121335	-6.38728	1.03256
1794	AMIGO1	HGLibA_01794	GCTACCCAAACTAACGCTCC	1.16301	0.535848	0.0410392	0.0476165		0.0409424	0.0888621	-4.61026	-3.49229	0.124102	76358	0.200576	0.0649022	-4.05128	0.697722
1795	AMIGO2	HGLibA_01795	AAGTACCTGACGCGAGTGCC	21.9183	7.93054	0.123118	0.380932		0.0173796	0.0480336	-5.84646	-4.37981	0.170854	86716	0.243154	0.0327066	-5.11314	0.614119
1796	AMIGO2	HGLibA_01796	TGACTCCAGGCACTCGCGTC	29.2543	15.1109	0.410392	0.571398		0.0195321	0.0378137	-5.67801	-4.72495	0.091881	67164	0.168827	0.0286729	-5.20148	0.772557
1797	AMIGO2	HGLibA_01797	AATAAAGCCAAGCGCACGAA	1.07355	1.71471	0.0410392	0.0476165		0.0443542	0.0277694	-4.49478	-5.17036	0.0520478	51905	0.123751	0.0360618	-4.83257	0.907453
1798	AMIGO3	HGLibA_01798	TGCGCGCGAGTACGTATGCT	16.0585	24.8097	0.410392	0.380932		0.0237215	0.0153541	-5.39766	-6.02523	0.0445215	48250	0.113874	0.0195378	-5.71145	0.943574
1799	AMIGO3	HGLibA_01799	CTCGCGCGCAAAGTCGCGCA	4.83098	4.2332	0.164157	0.0476165		0.00985649	0.0112484	-6.66471	-6.47414	0.00470001	15703	0.0369377	0.0105524	-6.56943	1.43253
1800	AMIGO3	HGLibA_01800	ACCGACCCACCAGCGCGTAC	8.1411	12.5924	0.164157	0.190466		0.0233956	0.0151255	-5.41762	-6.04688	0.0445484	48264	0.11391	0.0192605	-5.73225	0.943438
1801	AMMECR1	HGLibA_01801	ACGCACCGCCACCTACCTAC	27.2414	24.5954	0.328314	0.523782		0.0192274	0.0212959	-5.70069	-5.55328	0.00269708	11822	0.028155	0.0202617	-5.62698	1.55044
1802	AMMECR1	HGLibA_01802	GGTCGAGACAAAAGATTACG	0.536776	0.160754	0.0410392	0.0952331		0.177417	0.592414	-2.49478	-0.755322	0.277624	102730	0.333514	0.384915	-1.62505	0.476886
1803	AMMECR1	HGLibA_01803	ACAGCCCACTGTTTGTAACA	4.16001	5.6264	0.0820784	0.190466		0.045785	0.0338522	-4.44898	-4.88461	0.0230632	34975	0.0813796	0.0398186	-4.66679	1.08948
1804	AMMECR1L	HGLibA_01804	TTAGTCCGCTCTTTGTGACG	8.90153	5.94791	0.164157	0.238083		0.0267463	0.040028	-5.22452	-4.64285	0.0393697	45511	0.106758	0.0333871	-4.93368	0.971601
1805	AMMECR1L	HGLibA_01805	AGGGCTCAGCGCTCCCGATG	1.11828	2.57207	0.0410392	0.0476165		0.04258	0.0185129	-4.55368	-5.75532	0.131536	78148	0.207721	0.0305465	-5.1545	0.682519
1806	AMMECR1L	HGLibA_01806	ATTTCCCCCCCTGACCCGAG	0.178925	0.589432	0.0410392	0.0952331		0.532251	0.161567	-0.909822	-2.62979	0.266423	101252	0.32473	0.346909	-1.76981	0.488478
1807	AMN	HGLibA_01807	TGCGACGTCGAAGTCCGTGT	10.0645	7.60904	0.246235	0.14285		0.0141933	0.0187737	-6.13864	-5.73514	0.0196248	32441	0.0746562	0.0164835	-5.93689	1.12693
1808	AMN	HGLibA_01808	ACTTCGACGTCGCAGCCAAC	4.83098	21.3267	0.123118	0.238083		0.0492825	0.0111636	-4.34278	-6.48506	0.258312	100400	0.317516	0.030223	-5.41392	0.498235
1809	AMN	HGLibA_01809	CCGAGGCGAGATGGGCGTCC	7.69379	13.289	0.205196	0.333316		0.0433227	0.025082	-4.52873	-5.3172	0.0674474	58439	0.142435	0.0342024	-4.92297	0.846384
1810	AMN1	HGLibA_01810	ACCTTGTGCGAAGAAATTAG	5.18883	8.46639	0.123118	0.0952331		0.0183535	0.0112484	-5.7678	-6.47414	0.0546689	53123	0.127002	0.0148009	-6.12097	0.896188
1811	AMN1	HGLibA_01811	AGCTCCGTAGATCTAGAGTT	1.29721	5.25131	0.0410392	0.238083		0.183535	0.0453378	-2.44588	-4.46314	0.254134	99906	0.313924	0.114436	-3.45451	0.503176
1812	AMN1	HGLibA_01812	ACCTCTAATTTCTTCGCACA	0.626238	1.7683	0.0410392	0.0952331		0.152072	0.0538558	-2.71718	-4.21475	0.186929	89747	0.257046	0.102964	-3.46597	0.589989
1813	AMOT	HGLibA_01813	CATATGCCTCCGAGACGCGC	10.8697	11.4136	0.0820784	0.0952331		0.00876133	0.00834386	-6.83463	-6.90507	0.000605048	5215	0.0143182	0.00855259	-6.86985	1.84411
1814	AMOT	HGLibA_01814	GACAGAAATCCAGCGCGTCT	1.02882	1.60754	0.0410392	0.0476165		0.0462827	0.0296207	-4.43338	-5.07725	0.0479262	49968	0.118368	0.0379517	-4.75532	0.926765
1815	AMOT	HGLibA_01815	AGATCCTCTCAGACGAGAAC	1.61033	5.09055	0.205196	0.0476165		0.0295695	0.0093539	-5.07975	-6.74022	0.205401	92942	0.272738	0.0194617	-5.90998	0.564255
1816	AMOTL1	HGLibA_01816	TACCACCAAGCGAGAATCGC	13.822	17.1471	0.287275	0.380932		0.0275599	0.0222155	-5.18129	-5.49229	0.0118383	25102	0.0582016	0.0248877	-5.33679	1.23507
1817	AMOTL1	HGLibA_01817	CTTGTCCAGCGATTCTCGCT	9.61723	4.44753	0.123118	0.14285		0.0148535	0.0321188	-6.07305	-4.96044	0.116367	74329	0.193209	0.0234862	-5.51674	0.713973
1818	AMOTL1	HGLibA_01818	CCATCACCGTATTGTCCACC	34.801	47.2618	0.697667	0.523782		0.0150508	0.0110826	-6.05402	-6.49556	0.0229486	34909	0.0811284	0.0130667	-6.27479	1.09083
1819	AMOTL2	HGLibA_01819	ACTGTCCATCTTGTTCCGCA	27.2414	37.7237	0.492471	0.523782		0.0192274	0.0138847	-5.70069	-6.17036	0.0258325	36923	0.0863421	0.0165561	-5.93552	1.06378
1820	AMOTL2	HGLibA_01820	GCCGCAGCCGCGAAAACAGA	0.178925	0.696602	0.0410392	0.0476165		0.266125	0.0683555	-1.90982	-3.8708	0.267902	101466	0.325844	0.16724	-2.89031	0.486991
1821	AMOTL2	HGLibA_01821	GGAATCTGCAAATCGCCGCC	0.0447313	0.0535848	0.0410392	0.0476165		1.0645	0.888621	0.0901775	-0.17036	0.473465	117295	0.498152	0.976561	-0.0400912	0.302638
1822	AMPD1	HGLibA_01822	AATTAACAGTCTTCCGTCCT	8.27529	5.30489	0.0820784	0.190466		0.0230162	0.0359039	-5.4412	-4.79972	0.0464413	49196	0.116501	0.0294601	-5.12046	0.933671
1823	AMPD1	HGLibA_01823	CCCAGAAAAAAGCGTTTCCA	0.357851	0.696602	0.0410392	0.0476165		0.133063	0.0683555	-2.90982	-3.8708	0.104189	70866	0.181442	0.100709	-3.39031	0.741262
1824	AMPD1	HGLibA_01824	GGAGATTTCCCCCTTTGATG	3.7127	1.23245	0.0820784	0.0952331		0.0256506	0.0772714	-5.28486	-3.69392	0.194501	91145	0.263356	0.051461	-4.48939	0.579456
1825	AMPD2	HGLibA_01825	GGTGTCGGGGCCCTGTTCAT	1.02882	0.160754	0.0410392	0.0476165		0.0462827	0.296207	-4.43338	-1.75532	0.33237	107726	0.380763	0.171245	-3.09435	0.419345
1826	AMPD2	HGLibA_01826	ACATGGGGCCATTGATAATC	1.61033	1.3932	0.0820784	0.0476165		0.0295695	0.0341777	-5.07975	-4.8708	0.00580101	17428	0.0410781	0.0318736	-4.97527	1.38639
1827	AMPD2	HGLibA_01827	CCTCCCGCAGCGTCTGTTCA	6.53077	7.0196	0.0410392	0.14285		0.0218733	0.0203501	-5.51468	-5.61882	0.00139257	8389	0.0204862	0.0211117	-5.56675	1.68854
1828	AMPD3	HGLibA_01828	CTTACTAAATCCGGGGCACC	7.69379	6.05508	0.123118	0.14285		0.0185669	0.0235917	-5.75112	-5.40558	0.0144545	27804	0.0641579	0.0210793	-5.57835	1.19275
1829	AMPD3	HGLibA_01829	AGGAGAGTACTTTGCTCGGA	0.268388	0.0535848	0.0410392	0.0476165		0.177417	0.888621	-2.49478	-0.17036	0.391056	111887	0.431334	0.533019	-1.33257	0.365186
1830	AMPD3	HGLibA_01830	CATCTACGGCCGCAGTCCTG	6.35185	16.2898	0.123118	0.285699		0.0449789	0.0175386	-4.47461	-5.83333	0.154759	83466	0.228824	0.0312587	-5.15397	0.640499
1831	AMPH	HGLibA_01831	AGACTTCAGCGAGAACTCCG	5.59141	4.28678	0.0820784	0.0952331		0.017032	0.0222155	-5.87561	-5.49229	0.0176119	30711	0.0707728	0.0196238	-5.68395	1.15013
1832	AMPH	HGLibA_01832	TCTTCCCGCCCATACCAGTC	9.61723	5.94791	0.123118	0.0952331		0.00990234	0.0160112	-6.65802	-5.96478	0.0526915	52222	0.12452	0.0129568	-6.3114	0.904759
1833	AMPH	HGLibA_01833	ATGAAGTCTATGAGCCTGAC	3.04173	3.00075	0.0410392	0.14285		0.0469633	0.0476047	-4.41232	-4.39275	0.000350745	3754	0.0115306	0.047284	-4.40254	1.93815
1834	AMT	HGLibA_01834	CCCTGCGAGTACAGTCGTCC	13.5536	11.3064	0.328314	0.238083		0.017566	0.0210574	-5.83107	-5.56953	0.00846179	20937	0.0498771	0.0193117	-5.7003	1.3021
1835	AMT	HGLibA_01835	TGACGTGTCTCATATGCTGC	10.9144	7.28753	0.164157	0.0476165		0.00436271	0.00653398	-7.84056	-7.25782	0.0383607	44932	0.105362	0.00544834	-7.54919	0.977316
1836	AMT	HGLibA_01836	CGTCAAAGAGCGAGCAGTGC	5.81507	9.16299	0.164157	0.190466		0.0327539	0.0207865	-4.93219	-5.58821	0.0486262	50330	0.119233	0.0267702	-5.2602	0.923603
1837	AMTN	HGLibA_01837	TTTGGTAGTGTTCCCTGATC	12.1222	12.8068	0.246235	0.238083		0.0196402	0.0185904	-5.67004	-5.7493	0.000783468	6049	0.0159842	0.0191153	-5.70967	1.79631
1838	AMTN	HGLibA_01838	CTACAGTTAAATCCTGCTGC	2.81807	1.87547	0.0820784	0.0476165		0.0168968	0.0253892	-5.8871	-5.29964	0.0401593	45949	0.107861	0.021143	-5.59337	0.967136
1839	AMTN	HGLibA_01839	CCAGACCCACCCATTGACCC	2.10237	4.9298	0.0820784	0.0476165		0.022649	0.00965892	-5.46441	-6.69392	0.134721	78871	0.210801	0.0161539	-6.07917	0.676128
1840	AMY1A	HGLibA_01840	GTGCATAATTTATAGCTAAC	0.849895	1.28603	0.0410392	0.0476165		0.0560264	0.0370259	-4.15775	-4.75532	0.0425196	47156	0.111277	0.0465261	-4.45654	0.953593
1841	AMY1A	HGLibA_01841	TTCACAACCCTTTCAGACCT	31.5803	32.0437	0.451431	0.523782		0.0165857	0.0163459	-5.91392	-5.93493	5.60361e-05	973	0.00710737	0.0164658	-5.92442	2.14829
1842	AMY1A	HGLibA_01842	TTAAAATCCCATCCAGAATA	2.77334	2.03622	0.0820784	0.14285		0.0515081	0.0701543	-4.27906	-3.83333	0.0250523	36419	0.0848932	0.0608312	-4.05619	1.07113
1843	AMY1B	HGLibA_01843	TTCACAACCCTTTCAGACCT	0.0447313	0.0535848	0.0410392	0.0476165		1.0645	0.888621	0.0901775	-0.17036	0.473465	117296	0.498148	0.976561	-0.0400912	0.302642
1844	AMY1B	HGLibA_01844	GTGCATAATTTATAGCTAAC	0.0447313	0.0535848	0.0410392	0.0476165		1.0645	0.888621	0.0901775	-0.17036	0.473465	117297	0.498144	0.976561	-0.0400912	0.302645
1845	AMY1B	HGLibA_01845	TTTCTAGGTTCGTATTTATG	12.3458	16.1826	0.205196	0.285699		0.0231413	0.0176547	-5.43338	-5.8238	0.0182238	31247	0.0719756	0.020398	-5.62859	1.14281
1846	AMY1C	HGLibA_01846	CTGAACCCCTCCAAATCCCT	4.20474	1.17886	0.0410392	0.0952331		0.022649	0.0807837	-5.46441	-3.62979	0.225077	95968	0.28944	0.0517163	-4.5471	0.538441
1847	AMY1C	HGLibA_01847	AAAGCAAAATGAAGCTCTTT	2.50495	1.3932	0.0410392	0.0476165		0.0190089	0.0341777	-5.71718	-4.8708	0.075635	61548	0.151657	0.0265933	-5.29399	0.819137
1848	AMY1C	HGLibA_01848	GTGCATAATTTATAGCTAAC	0.0447313	0.0535848	0.0410392	0.0476165		1.0645	0.888621	0.0901775	-0.17036	0.473465	117298	0.49814	0.976561	-0.0400912	0.302649
1849	AMY2A	HGLibA_01849	TTTACAACCCTTTCAGACCT	0.268388	2.67924	0.0410392	0.0476165		0.177417	0.0177724	-2.49478	-5.81422	0.357465	109667	0.402264	0.0975946	-4.1545	0.395489
1850	AMY2A	HGLibA_01850	GTGCATAATTTATAGCTAAC	0.0447313	0.0535848	0.0410392	0.0476165		1.0645	0.888621	0.0901775	-0.17036	0.473465	117299	0.498135	0.976561	-0.0400912	0.302653
1851	AMY2A	HGLibA_01851	TTGAAATCCCATCCAGAATA	4.07055	1.87547	0.123118	0.0476165		0.0116978	0.0253892	-6.41762	-5.29964	0.119299	75098	0.196048	0.0185435	-5.85863	0.707638
1852	AMY2B	HGLibA_01852	ACAGGTCAGAGATTGTCGTC	2.05764	1.28603	0.0410392	0.0476165		0.0231413	0.0370259	-5.43338	-4.75532	0.0518642	51821	0.123514	0.0300836	-5.09435	0.908284
1853	AMY2B	HGLibA_01853	GCTGTAATTAATCATATGTC	1.47613	1.60754	0.0410392	0.0952331		0.0645152	0.0592414	-3.95422	-4.07725	0.0023178	10983	0.0260441	0.0618783	-4.01573	1.58429
1854	AMY2B	HGLibA_01854	ATGAATCATCTCATTGACAT	2.997	4.9298	0.123118	0.0952331		0.0317762	0.0193178	-4.97591	-5.69392	0.0575114	54350	0.13059	0.025547	-5.33492	0.884091
1855	AMZ1	HGLibA_01855	GTCCCGTACCTATCGGCTGT	12.2564	15.7539	0.410392	0.238083		0.0194252	0.0151126	-5.68593	-6.0481	0.0159873	29184	0.0676058	0.0172689	-5.86702	1.17002
1856	AMZ1	HGLibA_01856	ACGGCAGGCACTTGACGCGC	15.3428	14.2535	0.205196	0.238083		0.0155175	0.0167034	-6.00996	-5.90371	0.00139447	8397	0.0204945	0.0161105	-5.95684	1.68836
1857	AMZ1	HGLibA_01857	GCGCGTCAAGTGCCTGCCGT	8.05164	9.80601	0.123118	0.380932		0.0473112	0.0388468	-4.40168	-4.68606	0.0102803	23352	0.0543296	0.043079	-4.54387	1.26496
1858	AMZ2	HGLibA_01858	TTTACTACTTCGATCCTGTA	2.90754	3.53659	0.123118	0.14285		0.0491308	0.0403919	-4.34723	-4.62979	0.0102187	23226	0.0542967	0.0447613	-4.48851	1.26523
1859	AMZ2	HGLibA_01859	CAAATATGTGTCCGATCTCA	10.6908	10.8241	0.205196	0.285699		0.0267239	0.0263947	-5.22573	-5.24361	5.48801e-05	961	0.00704766	0.0265593	-5.23467	2.15195
1860	AMZ2	HGLibA_01860	CATGCAAGGCTCCAACCACT	4.74152	12.6996	0.0410392	0.0952331		0.0200849	0.00749891	-5.63774	-7.0591	0.161701	84883	0.235096	0.0137919	-6.34842	0.628754
1861	ANAPC1	HGLibA_01861	AAACAGCAATCCATATTTAG	1.78925	2.30414	0.0410392	0.190466		0.10645	0.0826624	-3.23175	-3.59662	0.0187332	31700	0.07293	0.0945563	-3.41419	1.13709
1862	ANAPC1	HGLibA_01862	GTGTGACTTCATTATATCAC	1.92345	6.64451	0.0410392	0.285699		0.148535	0.0429978	-2.75112	-4.53959	0.223405	95744	0.287962	0.0957664	-3.64536	0.540665
1863	ANAPC1	HGLibA_01863	CCTGAAAGGTTGCAAATGTT	2.37076	1.98264	0.0820784	0.14285		0.0602548	0.0720503	-4.05278	-3.79485	0.00893369	21628	0.0509763	0.0661526	-3.92382	1.29263
1864	ANAPC10	HGLibA_01864	TGTATCATGAATGTACGAGT	10.2435	4.12603	0.0410392	0.238083		0.0232424	0.0577027	-5.4271	-4.11522	0.147933	82006	0.222625	0.0404725	-4.77116	0.652426
1865	ANAPC10	HGLibA_01865	GACATACCCGAATTTCTTGA	0.0447313	0.214339	0.0820784	0.0476165		1.0645	0.222155	0.0901775	-2.17036	0.53269	123133	0.533893	0.643328	-1.04009	0.272546
1866	ANAPC10	HGLibA_01866	CCCTTGGCAGCAACTTGAGT	7.11228	8.35922	0.164157	0.190466		0.0267799	0.0227852	-5.22271	-5.45576	0.00673838	18849	0.0441185	0.0247825	-5.33923	1.35538
1867	ANAPC11	HGLibA_01867	GATGCCACAGTTCTCATCGT	11.0039	9.37733	0.205196	0.190466		0.017309	0.0203113	-5.85234	-5.62157	0.00655932	18592	0.0435398	0.0188101	-5.73695	1.36111
1868	ANAPC11	HGLibA_01868	CGACGACTGCCCGCTGGTGT	0.134194	0.321509	0.0820784	0.0476165		0.354834	0.148103	-1.49478	-2.75532	0.229083	96552	0.292809	0.251469	-2.12505	0.533415
1869	ANAPC11	HGLibA_01869	CCCTCCGTAGGCAAGGTGCC	55.1537	33.9727	0.738706	0.476165		0.00863342	0.0140161	-6.85585	-6.15677	0.0534466	52587	0.125428	0.0113248	-6.50631	0.901604
1870	ANAPC13	HGLibA_01870	CATGAGAATGTTCCCCCCAT	11.1381	5.09055	0.0820784	0.0952331		0.00855021	0.0187078	-6.86982	-5.74022	0.117461	74610	0.194289	0.013629	-6.30502	0.711551
1871	ANAPC13	HGLibA_01871	AGCCAAGCGTCAGTTTCCAA	10.4224	1.50037	0.205196	0.0952331		0.00913735	0.0634729	-6.77401	-3.97771	0.322526	106923	0.372261	0.0363051	-5.37586	0.429152
1872	ANAPC13	HGLibA_01872	GGTATTGCGACATCCTCATA	1.34194	3.48301	0.164157	0.0476165		0.0354834	0.0136711	-4.81671	-6.19273	0.164369	85460	0.237362	0.0245772	-5.50472	0.624589
1873	ANAPC15	HGLibA_01873	TGTCTTTCTCCGCGATGCTT	25.4074	19.7192	0.574549	0.380932		0.014993	0.0193178	-6.05957	-5.69392	0.0162002	29408	0.0679844	0.0171554	-5.87675	1.16759
1874	ANAPC15	HGLibA_01874	TAATCTGGATCGACCCTGTG	8.76734	12.4317	0.205196	0.14285		0.0162934	0.0114908	-5.93957	-6.44338	0.0295315	39495	0.0922778	0.0138921	-6.19147	1.0349
1875	ANAPC15	HGLibA_01875	CCCACAGCTCCAAAGCATCG	4.07055	6.91243	0.0820784	0.14285		0.0350934	0.0206656	-4.83265	-5.59662	0.0632615	56742	0.137591	0.0278795	-5.21464	0.861411
1876	ANAPC16	HGLibA_01876	ATGTTTCACCTGTTTAAGCG	3.80216	4.98338	0.0410392	0.0476165		0.0125235	0.00955506	-6.31921	-6.70952	0.0179527	31017	0.0714303	0.0110393	-6.51437	1.14612
1877	ANAPC16	HGLibA_01877	AGCTAAAAACAGATTCGCAG	0.313119	0.643017	0.0820784	0.0476165		0.152072	0.0740517	-2.71718	-3.75532	0.130325	77885	0.206503	0.113062	-3.23625	0.685073
1878	ANAPC16	HGLibA_01878	TAAGCCCATCGAGCAGCTGC	0.134194	0.857356	0.0820784	0.0952331		0.709667	0.111078	-0.494785	-3.17036	0.377201	111062	0.419142	0.410373	-1.83257	0.377639
1879	ANAPC2	HGLibA_01879	ATGCCCGTCGCCGGTACTAC	20.1738	10.449	0.369353	0.14285		0.00708094	0.0136711	-7.14184	-6.19273	0.0904319	66713	0.167288	0.010376	-6.66729	0.776535
1880	ANAPC2	HGLibA_01880	GAGATGATCCAGCGTCTGTA	0.0447313	0.160754	0.0410392	0.0476165		1.0645	0.296207	0.0901775	-1.75532	0.4206	114213	0.454472	0.680354	-0.832572	0.342493
1881	ANAPC2	HGLibA_01881	GGTAGAAGAACCTTTGCACG	1.92345	1.66113	0.0410392	0.0476165		0.0247558	0.0286652	-5.33609	-5.12456	0.00558674	17085	0.040355	0.0267105	-5.23032	1.3941
1882	ANAPC4	HGLibA_01882	TCCTGGTCTGGTCGCCCAAG	8.45422	11.1456	0.246235	0.476165		0.0563228	0.0427222	-4.15014	-4.54887	0.0198672	32652	0.0750899	0.0495225	-4.3495	1.12442
1883	ANAPC4	HGLibA_01883	ACAGGTCGGAAAACGCAACA	5.23356	2.19698	0.164157	0.0952331		0.0181966	0.0433474	-5.78019	-4.52791	0.142127	80699	0.217352	0.030772	-5.15405	0.662836
1884	ANAPC4	HGLibA_01884	CACTTCCATCCAATGCATAC	2.77334	7.71621	0.123118	0.0952331		0.0343387	0.012342	-4.86402	-6.34028	0.173297	87158	0.245379	0.0233404	-5.60215	0.610163
1885	ANAPC5	HGLibA_01885	GGTGACGCCGTACAAGATCG	0.402582	0.0535848	0.0410392	0.0952331		0.236556	1.77724	-2.07975	0.82964	0.460668	117148	0.485297	1.0069	-0.625054	0.313993
1886	ANAPC5	HGLibA_01886	GTCCTTGATGCCGAACACAT	14.0456	14.843	0.328314	0.0476165		0.00339013	0.00320802	-8.20444	-8.2841	0.000877778	6447	0.0168028	0.00329907	-8.24427	1.77462
1887	ANAPC5	HGLibA_01887	CCACCTCGCAGAGCTACACG	9.66196	9.00224	0.205196	0.14285		0.0147847	0.0158682	-6.07975	-5.97771	0.00130637	8052	0.0200224	0.0153265	-6.02873	1.69848
1888	ANAPC7	HGLibA_01888	CCTGTACAAGAAGGCTGGTC	3.57851	6.48376	0.0820784	0.0952331		0.0266125	0.0146879	-5.23175	-6.08922	0.0765904	61871	0.152771	0.0206502	-5.66049	0.815959
1889	ANAPC7	HGLibA_01889	GATCCAAACCGTGCCTAACT	4.11528	3.05433	0.0820784	0.0476165		0.0115707	0.0155898	-6.43338	-6.00325	0.0219888	34223	0.0792934	0.0135803	-6.21832	1.10076
1890	ANAPC7	HGLibA_01890	CCTGACCAGCCTTCTTGTAC	15.2981	7.3947	0.123118	0.238083		0.0155629	0.0321964	-6.00575	-4.95696	0.105773	71293	0.183097	0.0238796	-5.48135	0.737318
1891	ANG	HGLibA_01891	GGCCCGCTGGTTACGGACGA	6.5755	5.94791	0.0820784	0.0952331		0.014483	0.0160112	-6.10949	-5.96478	0.0025752	11548	0.0275206	0.0152471	-6.03714	1.56034
1892	ANG	HGLibA_01892	AACGTTTCTGAACCCCGCTG	2.01291	1.7683	0.123118	0.0476165		0.0236556	0.0269279	-5.40168	-5.21475	0.00498986	16202	0.0380079	0.0252917	-5.30821	1.42013
1893	ANG	HGLibA_01893	ACCTCCATGTAGCTTGCAAG	0.626238	3.96527	0.0820784	0.0952331		0.152072	0.0240168	-2.71718	-5.37981	0.317114	106432	0.367703	0.0880442	-4.0485	0.434502
1894	ANGEL1	HGLibA_01894	CGAAGCGATAGTTCCAATTG	6.7097	3.42942	0.0820784	0.0476165		0.00709667	0.0138847	-7.13864	-6.17036	0.0927152	67430	0.169688	0.0104907	-6.6545	0.770348
1895	ANGEL1	HGLibA_01895	AGGACTGGGTGTAAAACCGA	1.47613	1.3932	0.0410392	0.0952331		0.0645152	0.0683555	-3.95422	-3.8708	0.00131131	8090	0.0200037	0.0664353	-3.91251	1.69889
1896	ANGEL1	HGLibA_01896	TCGCTTCGTGAACCTCATGC	12.5695	19.2905	0.0410392	0.285699		0.0227296	0.0148103	-5.45929	-6.07725	0.0426031	47189	0.111418	0.01877	-5.76827	0.953045
1897	ANGEL2	HGLibA_01897	TAGTTACGTCATGAACGCTG	2.46022	2.4649	0.0820784	0.14285		0.0580637	0.0579535	-4.10622	-4.10896	0.00016812	2194	0.00945662	0.0580086	-4.10759	2.02426
1898	ANGEL2	HGLibA_01898	CAGGTCTCCAGTTACAGTAC	0.581507	3.59018	0.0410392	0.190466		0.327539	0.053052	-1.61026	-4.23645	0.321	106800	0.370927	0.190295	-2.92336	0.430712
1899	ANGEL2	HGLibA_01899	CTAAAACTCCAGTGTAATAC	5.05464	2.89358	0.0820784	0.0952331		0.0188407	0.0329119	-5.73	-4.92525	0.0693873	59206	0.144633	0.0258763	-5.32762	0.839732
1900	ANGPT1	HGLibA_01900	GAGAAATCCGGTTCCACGTG	1.16301	0.214339	0.0410392	0.0476165		0.0409424	0.222155	-4.61026	-2.17036	0.307272	105609	0.359067	0.131549	-3.39031	0.444824
1901	ANGPT1	HGLibA_01901	TCGACTTGAGATACAGCTGC	9.34884	10.449	0.123118	0.0952331		0.0101866	0.00911406	-6.61718	-6.77769	0.00314451	12798	0.0303224	0.00965034	-6.69744	1.51824
1902	ANGPT1	HGLibA_01902	CGACAGTTGCCATCGTGTTC	7.4254	9.53809	0.205196	0.14285		0.019238	0.0149768	-5.6999	-6.06113	0.0157993	29016	0.0671976	0.0171074	-5.88052	1.17265
1903	ANGPT2	HGLibA_01903	AACGCGGAAGTTAACTGATG	5.00991	3.96527	0.0820784	0.0952331		0.0190089	0.0240168	-5.71718	-5.37981	0.0138094	27189	0.0626808	0.0215129	-5.5485	1.20287
1904	ANGPT2	HGLibA_01904	GACAATTATTCAGCGACGTG	0.223657	0.803771	0.0820784	0.0476165		0.2129	0.0592414	-2.23175	-4.07725	0.262408	100868	0.321054	0.136071	-3.1545	0.493422
1905	ANGPT2	HGLibA_01905	TCCGCGTTTGCTCCGCTGTT	12.7484	11.5207	0.164157	0.190466		0.0149404	0.0165325	-6.06464	-5.91855	0.00262632	11673	0.0277664	0.0157364	-5.9916	1.55648
1906	ANGPT4	HGLibA_01906	AGTTGTGCCTGACACCGCGC	0.357851	3.10792	0.0820784	0.0476165		0.133063	0.0153211	-2.90982	-6.02834	0.348958	109107	0.394707	0.0741918	-4.46908	0.403725
1907	ANGPT4	HGLibA_01907	GCCCTCACCAACATCGAGCG	5.05464	5.30489	0.123118	0.238083		0.0471018	0.0448798	-4.40807	-4.47779	0.000757824	5911	0.015822	0.0459908	-4.44293	1.80074
1908	ANGPT4	HGLibA_01908	GGGCCATCAAGACGATCTTG	2.05764	1.44679	0.0410392	0.14285		0.069424	0.0987357	-3.84842	-3.34028	0.0330665	41874	0.0974534	0.0840798	-3.59435	1.0112
1909	ANGPTL1	HGLibA_01909	GTATGACCCGCCTCTGTATT	5.18883	2.78641	0.246235	0.0476165		0.00917673	0.0170889	-6.7678	-5.8708	0.0859759	65236	0.162646	0.0131328	-6.3193	0.788757
1910	ANGPTL1	HGLibA_01910	TGAATAACAGTCCAACCCCC	0.268388	1.3932	0.0410392	0.0952331		0.354834	0.0683555	-1.49478	-3.8708	0.308307	105698	0.359974	0.211595	-2.68279	0.443729
1911	ANGPTL1	HGLibA_01911	AGATACCCTCGTGCCACAGA	4.74152	2.19698	0.0820784	0.0476165		0.0100425	0.0216737	-6.63774	-5.52791	0.115901	74137	0.192933	0.0158581	-6.08283	0.714594
1912	ANGPTL2	HGLibA_01912	GCACTTACCCGACGGCTTGT	4.60733	8.0913	0.123118	0.14285		0.0310049	0.0176547	-5.01136	-5.8238	0.0703445	59542	0.145801	0.0243298	-5.41758	0.83624
1913	ANGPTL2	HGLibA_01913	CCAACGCGTTGTCCCGCTTG	45.3576	33.1154	0.738706	0.666632		0.0146973	0.0201306	-6.08831	-5.63447	0.0243175	35911	0.0835689	0.0174139	-5.86139	1.07796
1914	ANGPTL2	HGLibA_01914	GGTACCGCGGGGGCCATTAC	1.38667	1.0717	0.0820784	0.0476165		0.0343387	0.044431	-4.86402	-4.49229	0.0180154	31073	0.0715509	0.0393849	-4.67815	1.14538
1915	ANGPTL3	HGLibA_01915	AGACTTTGTCCATAAGACGA	0.984089	1.28603	0.0820784	0.14285		0.145159	0.111078	-2.78429	-3.17036	0.021936	34178	0.079207	0.128118	-2.97733	1.10124
1916	ANGPTL3	HGLibA_01916	CAAAGACCTTCTCCAGACCG	12.0327	7.07319	0.369353	0.238083		0.0197863	0.0336599	-5.65936	-4.89283	0.0649964	57462	0.139593	0.0267231	-5.27609	0.855138
1917	ANGPTL3	HGLibA_01917	GTCTACTGTGATGTTATATC	0.0447313	1.82188	0.0410392	0.0476165		1.0645	0.0261359	0.0901775	-5.25782	0.422478	116241	0.448537	0.545319	-2.58382	0.348202
1918	ANGPTL4	HGLibA_01918	ATCCCCAAACCCCGCCTTGT	1.38667	1.92905	0.0410392	0.0952331		0.0686775	0.0493678	-3.86402	-4.34028	0.0281559	38551	0.0901338	0.0590227	-4.10215	1.04511
1919	ANGPTL4	HGLibA_01919	GTGAACTGCAAGATGACCTC	6.26238	8.84149	0.0820784	0.190466		0.0304143	0.0215423	-5.03911	-5.53668	0.0289826	39100	0.0914774	0.0259783	-5.28789	1.03869
1920	ANGPTL4	HGLibA_01920	TTTGCAGATGCTGAATTCGC	12.2564	20.1479	0.287275	0.285699		0.0233102	0.0141801	-5.42289	-6.13999	0.0563202	53861	0.129046	0.0187452	-5.78144	0.889256
1921	ANGPTL5	HGLibA_01921	TAACTGTGTACATCATTCTA	6.12819	11.36	0.123118	0.14285		0.0233102	0.0125748	-5.42289	-6.31332	0.0812024	63584	0.157607	0.0179425	-5.8681	0.802425
1922	ANGPTL5	HGLibA_01922	GAAGTACCAAAAAACTACTA	0.178925	0.643017	0.0410392	0.0476165		0.266125	0.0740517	-1.90982	-3.75532	0.254906	99979	0.314649	0.170089	-2.83257	0.502174
1923	ANGPTL5	HGLibA_01923	GGATGAGCAACAAGCTTCCT	3.39958	2.78641	0.0410392	0.0952331		0.0280132	0.0341777	-5.15775	-4.8708	0.0101951	23191	0.0542535	0.0310955	-5.01427	1.26557
1924	ANGPTL6	HGLibA_01924	TGTGGTTCCGGTCCGTCTTG	18.1162	16.3434	0.246235	0.285699		0.0157704	0.0174811	-5.98664	-5.83806	0.00272062	11878	0.028267	0.0166257	-5.91235	1.54872
1925	ANGPTL6	HGLibA_01925	GCCGTCACGTAGTGTCAGTA	5.68088	11.4671	0.0820784	0.190466		0.0335276	0.0166097	-4.89851	-5.91183	0.100236	69735	0.177389	0.0250687	-5.40517	0.751073
1926	ANGPTL6	HGLibA_01926	TCAGCTGATACACGGGTTCA	2.19183	2.30414	0.0820784	0.0476165		0.0217245	0.0206656	-5.52453	-5.59662	0.000723139	5774	0.0154561	0.0211951	-5.56058	1.8109
1927	ANGPTL7	HGLibA_01927	TTGTCTCCTTCTACCGGGAC	3.53377	1.44679	0.0820784	0.0476165		0.0134747	0.0329119	-6.2136	-4.92525	0.145734	81488	0.22071	0.0231933	-5.56943	0.656178
1928	ANGPTL7	HGLibA_01928	AGGCTGTGTTGTTATGATAC	5.00991	6.48376	0.205196	0.14285		0.0285134	0.0220319	-5.13221	-5.50426	0.0170703	30182	0.0697987	0.0252727	-5.31824	1.15615
1929	ANGPTL7	HGLibA_01929	CCTCCATCTCTACACGCAGC	16.2822	11.1456	0.123118	0.380932		0.0233956	0.0341777	-5.41762	-4.8708	0.0346064	42743	0.0999183	0.0287867	-5.14421	1.00035
1930	ANHX	HGLibA_01930	TCCACTACCGTCTGGTCATG	18.9213	37.295	0.451431	0.476165		0.0251655	0.0127675	-5.31241	-6.29138	0.0949673	68122	0.172044	0.0189665	-5.80189	0.764359
1931	ANHX	HGLibA_01931	GAAGCTGCACAATTTCGCTG	3.89162	0.910941	0.0820784	0.14285		0.0367069	0.156815	-4.7678	-2.67286	0.264451	101072	0.3229	0.0967612	-3.72033	0.490931
1932	ANHX	HGLibA_01932	CAGCTTCTCACGAACCTCTC	9.08046	5.89432	0.164157	0.14285		0.0157315	0.0242351	-5.9902	-5.36676	0.0440894	48022	0.113305	0.0199833	-5.67848	0.945752
1933	ANK1	HGLibA_01933	TAATATCTACCCCATTCCGC	5.45722	3.80452	0.0410392	0.0476165		0.00872542	0.0125158	-6.84056	-6.32011	0.0309616	40510	0.0943225	0.0106206	-6.58033	1.02538
1934	ANK1	HGLibA_01934	CTCCCGTGACCGAAAGAAGA	1.47613	1.82188	0.0820784	0.0476165		0.0322576	0.0261359	-4.95422	-5.25782	0.0118142	25081	0.0581319	0.0291968	-5.10602	1.23559
1935	ANK1	HGLibA_01935	GCGGTTTCTCCGCTTCCTGT	2.8628	3.00075	0.0410392	0.0476165		0.0166328	0.0158682	-5.90982	-5.97771	0.000571374	5058	0.0139411	0.0162505	-5.94377	1.8557
1936	ANK2	HGLibA_01936	TGGACTCAACGCTCTCCATC	26.4809	28.4535	0.328314	0.476165		0.0179814	0.0167349	-5.79735	-5.901	0.00133276	8162	0.0201516	0.0173581	-5.84917	1.69569
1937	ANK2	HGLibA_01937	CGCTCTTCACATTGCATCTT	10.4224	9.10941	0.205196	0.14285		0.013706	0.0156815	-6.18905	-5.99479	0.00466215	15649	0.0367666	0.0146938	-6.09192	1.43455
1938	ANK2	HGLibA_01938	CAATATTAATGCACAGTCTC	6.17292	7.23394	0.369353	0.14285		0.0231413	0.0197471	-5.43338	-5.66221	0.00700487	19209	0.0450038	0.0214442	-5.5478	1.34675
1939	ANK3	HGLibA_01939	TGGTTTCACGCCATTGTATA	13.151	18.5939	0.287275	0.571398		0.043449	0.0307304	-4.52453	-5.02419	0.0297567	39656	0.0926039	0.0370897	-4.77436	1.03337
1940	ANK3	HGLibA_01940	AGCATTGCACATCGCATCTT	25.81	15.5932	0.246235	0.428549		0.016604	0.0274831	-5.91232	-5.18531	0.0575653	54393	0.130609	0.0220436	-5.54882	0.884028
1941	ANK3	HGLibA_01941	TCCTGGGCTGCCATATACAA	1.29721	1.12528	0.0410392	0.0476165		0.0367069	0.0423153	-4.7678	-4.56268	0.00539097	16804	0.0395921	0.0395111	-4.66524	1.40239
1942	ANKAR	HGLibA_01942	GCACAGCGAGAGTGTACTTC	4.60733	8.84149	0.0820784	0.0476165		0.010335	0.00538558	-6.59632	-7.53668	0.0879402	65861	0.164783	0.00786027	-7.0665	0.783087
1943	ANKAR	HGLibA_01943	ACCAGTAGGTTGATTAGAGA	2.23657	0.589432	0.0410392	0.0476165		0.02129	0.0807837	-5.55368	-3.62979	0.238428	97812	0.300829	0.0510369	-4.59174	0.521681
1944	ANKAR	HGLibA_01944	AACAAGGAGCTGTTGCACTT	18.2951	10.5562	0.287275	0.14285		0.00780808	0.0135323	-7.00082	-6.20745	0.0668212	58189	0.141719	0.0106702	-6.60413	0.848573
1945	ANKDD1A	HGLibA_01945	GCCGCCCGCCAGAACAATGT	1.47613	3.8581	0.0410392	0.190466		0.12903	0.0493678	-2.95422	-4.34028	0.16595	85781	0.238748	0.0891991	-3.64725	0.622061
1946	ANKDD1A	HGLibA_01946	ACCTGTCCACTGTTGCTCGA	5.50195	9.00224	0.205196	0.0952331		0.017309	0.0105788	-5.85234	-6.56268	0.0557543	53613	0.12834	0.0139439	-6.20751	0.891638
1947	ANKDD1A	HGLibA_01947	TCGACGCCATCGAGCAACAG	3.31012	7.60904	0.123118	0.14285		0.0431555	0.0187737	-4.53431	-5.73514	0.13148	78136	0.207665	0.0309646	-5.13473	0.682637
1948	ANKDD1B	HGLibA_01948	GAGCAATCATGTGCGCATCG	14.3588	22.7735	0.369353	0.14285		0.00994861	0.00627262	-6.65129	-7.31672	0.0489894	50482	0.119762	0.00811061	-6.984	0.921681
1949	ANKDD1B	HGLibA_01949	CCACATACCTACCTGATTCT	13.0168	20.255	0.164157	0.285699		0.0219485	0.0141051	-5.50974	-6.14764	0.0453626	48645	0.115084	0.0180268	-5.82869	0.938987
1950	ANKDD1B	HGLibA_01950	TATTCAAGATCTGCACCTCA	2.77334	2.19698	0.0820784	0.0476165		0.0171694	0.0216737	-5.86402	-5.52791	0.0139314	27322	0.0629269	0.0194215	-5.69597	1.20116
1951	ANKEF1	HGLibA_01951	CGATTGGTCCGTAGAACGTG	27.465	11.8422	0.492471	0.238083		0.00866858	0.0201045	-6.84999	-5.63633	0.132272	78293	0.208496	0.0143866	-6.24316	0.680903
1952	ANKEF1	HGLibA_01952	CAGCGATAATGCCGCTTAGT	8.32002	7.3947	0.205196	0.14285		0.0171694	0.0193178	-5.86402	-5.69392	0.00362271	13752	0.0325104	0.0182436	-5.77897	1.48798
1953	ANKEF1	HGLibA_01953	CTTGCACACGCCGTCATTAG	9.21465	10.5026	0.123118	0.333316		0.0361724	0.0317365	-4.78897	-4.97771	0.00455926	15470	0.0363712	0.0339544	-4.88334	1.43924
1954	ANKFN1	HGLibA_01954	ACGCAGCCAAACGCCTGTAC	2.37076	4.60829	0.205196	0.0476165		0.0200849	0.0103328	-5.63774	-6.59662	0.0955388	68266	0.172715	0.0152089	-6.11718	0.762671
1955	ANKFN1	HGLibA_01955	GTACAGGCGTTTGGCTGCGT	0.0447313	1.3932	0.0410392	0.0952331		2.129	0.0683555	1.09018	-3.8708	0.436555	116765	0.461403	1.09868	-1.39031	0.33592
1956	ANKFN1	HGLibA_01956	GGTGTCAAGCCCTCGCTGTT	2.50495	4.34037	0.0410392	0.14285		0.0570268	0.0329119	-4.13221	-4.92525	0.0684258	58856	0.143477	0.0449694	-4.52873	0.843217
1957	ANKFY1	HGLibA_01957	TGACGATGACAATGCTTCGC	45.447	37.1878	0.451431	0.999947		0.0220025	0.0268891	-5.50619	-5.21683	0.0102363	23277	0.0542713	0.0244458	-5.36151	1.26543
1958	ANKFY1	HGLibA_01958	CTAGTTTCATCAGTTCAGTC	4.78625	0.535848	0.0820784	0.14285		0.0298458	0.266586	-5.06633	-1.90733	0.353286	109422	0.398452	0.148216	-3.48683	0.399624
1959	ANKFY1	HGLibA_01959	CTGTATTCGCTTCTACCAGA	1.07355	0.267924	0.0820784	0.0952331		0.0887084	0.355448	-3.49478	-1.49229	0.285358	103562	0.340051	0.222078	-2.49354	0.468457
1960	ANKH	HGLibA_01960	TCCCCACCGACTCGTCCACA	23.4392	20.3622	0.287275	0.571398		0.0243779	0.0280617	-5.35828	-5.15525	0.00513814	16428	0.0385989	0.0262198	-5.25677	1.41343
1961	ANKH	HGLibA_01961	GCCGTCTTTCACACACTGAT	4.65206	3.32226	0.0410392	0.0476165		0.0102356	0.0143326	-6.61026	-6.12456	0.0272803	37944	0.0887278	0.0122841	-6.36741	1.05194
1962	ANKH	HGLibA_01962	CTCACCATTGCGTCCATGAA	7.60432	8.7879	0.164157	0.428549		0.0563559	0.0487658	-4.14929	-4.35799	0.00584031	17507	0.0411697	0.0525609	-4.25364	1.38542
1963	ANKHD1	HGLibA_01963	GACGGGTCTTACCCCCTTGA	5.41249	2.83999	0.123118	0.0952331		0.0175951	0.0335329	-5.82869	-4.89828	0.0890534	66276	0.165824	0.025564	-5.36348	0.780352
1964	ANKHD1	HGLibA_01964	CAGCCTCAGATTGCTATTAC	7.60432	6.48376	0.164157	0.0476165		0.00626177	0.00734397	-7.31921	-7.08922	0.00652728	18559	0.0434042	0.00680287	-7.20422	1.36247
1965	ANKHD1	HGLibA_01965	GTGCAGTTGCTAGTGCAAGC	5.05464	0.964526	0.0410392	0.14285		0.0282611	0.148103	-5.14504	-2.75532	0.289907	104000	0.344016	0.0881823	-3.95018	0.463421
1966	ANKHD1-EIF4EBP3	HGLibA_01966	AGTGTATGCGTTGGCACACG	20.9343	36.8127	0.53351	0.476165		0.0227458	0.0129348	-5.45826	-6.2726	0.0701776	59482	0.145602	0.0178403	-5.86543	0.836833
1967	ANKHD1-EIF4EBP3	HGLibA_01967	CAGCCTCAGATTGCTATTAC	0.0447313	0.0535848	0.0410392	0.0476165		1.0645	0.888621	0.0901775	-0.17036	0.473465	117300	0.498131	0.976561	-0.0400912	0.302656
1968	ANKHD1-EIF4EBP3	HGLibA_01968	GCCAACGCATACACTTGCCA	4.60733	6.00149	0.0820784	0.0952331		0.0206699	0.0158682	-5.59632	-5.97771	0.017399	30552	0.070281	0.0182691	-5.78702	1.15316
1969	ANKIB1	HGLibA_01969	GGCGTGCCAAGCGAGGATGA	9.84089	3.37584	0.123118	0.0476165		0.00483864	0.0141051	-7.69118	-6.14764	0.181104	88702	0.25197	0.00947187	-6.91941	0.598651
1970	ANKIB1	HGLibA_01970	GGCTCCCCATAAGATGTATT	0.223657	0.910941	0.0410392	0.0476165		0.2129	0.0522718	-2.23175	-4.25782	0.267479	101400	0.325541	0.132586	-3.24479	0.487395
1971	ANKIB1	HGLibA_01971	TTTAGTCTACGAAGATCCTG	15.3428	12.1637	0.164157	0.238083		0.0155175	0.0195731	-6.00996	-5.67498	0.0134868	26808	0.0620868	0.0175453	-5.84247	1.207
1972	ANKK1	HGLibA_01972	GAGGCGGCTTAATGCTGTGC	5.50195	3.32226	0.0820784	0.0476165		0.00865448	0.0143326	-6.85234	-6.12456	0.0574969	54330	0.130605	0.0114935	-6.48845	0.884042
1973	ANKK1	HGLibA_01973	ACATCGAGAGGTCGGCTCTG	0.178925	3.26867	0.0410392	0.0476165		0.266125	0.0145676	-1.90982	-6.1011	0.390548	111854	0.4309	0.140346	-4.00546	0.365624
1974	ANKK1	HGLibA_01974	GCCGCATGCCTGCCGCCACT	18.5635	20.1479	0.246235	0.428549		0.0230856	0.0212702	-5.43686	-5.55502	0.0017534	9511	0.0227515	0.0221779	-5.49594	1.64299
1975	ANKLE2	HGLibA_01975	CCCAGTTCCTCCGCCAAGCG	8.67788	6.16225	0.205196	0.14285		0.0164614	0.0231814	-5.92477	-5.43089	0.0288522	39016	0.0912622	0.0198214	-5.67783	1.03971
1976	ANKLE2	HGLibA_01976	GACACCGACACCTACAGAGC	1.07355	0.535848	0.0410392	0.0952331		0.0887084	0.177724	-3.49478	-2.49229	0.112353	73211	0.189393	0.133216	-2.99354	0.722637
1977	ANKLE2	HGLibA_01977	AAGGAGCCGCCCCTGTACTA	2.41549	0.857356	0.0410392	0.0952331		0.039426	0.111078	-4.66471	-3.17036	0.181905	88848	0.252668	0.0752518	-3.91753	0.597449
1978	ANKMY1	HGLibA_01978	AGCAGAGCGCGAGACGTTCC	2.72861	9.27016	0.123118	0.0476165		0.0174508	0.00513654	-5.84056	-7.60499	0.212335	94020	0.278711	0.0112937	-6.72277	0.554845
1979	ANKMY1	HGLibA_01979	AGGAACGTCTCGCGCTCTGC	19.0108	15.0037	0.287275	0.333316		0.017533	0.0222155	-5.83379	-5.49229	0.0140967	27471	0.0633282	0.0198742	-5.66304	1.1984
1980	ANKMY1	HGLibA_01980	GAAGCAGTTACCTCGCCTGT	1.47613	2.73282	0.205196	0.0952331		0.0645152	0.0348479	-3.95422	-4.84279	0.0902848	66679	0.167101	0.0496816	-4.3985	0.777021
1981	ANKMY2	HGLibA_01981	TGCAAATTACTACTGCGACA	0.223657	1.33962	0.0820784	0.0952331		0.4258	0.0710897	-1.23175	-3.81422	0.340166	108335	0.387504	0.248445	-2.52298	0.411724
1982	ANKMY2	HGLibA_01982	CTACTGGAAGTCATCGGGAA	1.11828	2.41131	0.0410392	0.0952331		0.0851601	0.0394943	-3.55368	-4.66221	0.11986	75288	0.196472	0.0623272	-4.10795	0.706699
1983	ANKMY2	HGLibA_01983	GTTGACACGAACATTCTTGC	10.154	16.7184	0.123118	0.238083		0.0234472	0.0142407	-5.41444	-6.13383	0.0562083	53816	0.128897	0.0188439	-5.77414	0.889757
1984	ANKRA2	HGLibA_01984	TCGAGAAAGTGCACTGTCGT	26.8835	18.5403	0.287275	0.571398		0.0212546	0.0308192	-5.55608	-5.02003	0.0333443	42071	0.0978122	0.0260369	-5.28805	1.00961
1985	ANKRA2	HGLibA_01985	ATGGATCTAGCTGTAGCCCT	5.32303	4.9298	0.123118	0.238083		0.0447269	0.0482946	-4.48271	-4.37199	0.00171104	9403	0.0224568	0.0465108	-4.42735	1.64865
1986	ANKRA2	HGLibA_01986	AGCTTTGTCTGTTCACCAGT	7.11228	7.93054	0.123118	0.0952331		0.01339	0.0120084	-6.22271	-6.37981	0.00303635	12583	0.0297798	0.0126992	-6.30126	1.52608
1987	ANKRD1	HGLibA_01987	CCAGATCGAATTCCGTGATA	1.87872	1.60754	0.0410392	0.0476165		0.0253453	0.0296207	-5.30214	-5.07725	0.00631355	18279	0.042626	0.027483	-5.1897	1.37033
1988	ANKRD1	HGLibA_01988	CCATATCACGGAATTCGATC	7.51486	5.6264	0.205196	0.0952331		0.0126726	0.0169261	-6.30214	-5.88461	0.0210202	33475	0.0774942	0.0147994	-6.09337	1.11073
1989	ANKRD1	HGLibA_01989	TTGGCTTTAGACGGAACCTG	15.9243	10.0203	0.369353	0.285699		0.017941	0.0285119	-5.80059	-5.13229	0.0504247	51151	0.121659	0.0232265	-5.46644	0.914857
1990	ANKRD10	HGLibA_01990	TGGCGTCTGCGCGTACCGTG	0.581507	13.7177	0.164157	0.238083		0.409424	0.0173559	-1.28833	-5.84843	0.401002	112625	0.439405	0.21339	-3.56838	0.357135
1991	ANKRD10	HGLibA_01991	TCTGTGTCGCCATTCGTGAG	36.3218	28.9358	0.779745	0.571398		0.0157315	0.0197471	-5.9902	-5.66221	0.0131062	26427	0.0612045	0.0177393	-5.8262	1.21322
1992	ANKRD10	HGLibA_01992	TCTGCCGTGCCACTCACGAA	44.1498	28.132	0.615588	0.809481		0.0183349	0.0287744	-5.76927	-5.11907	0.0474983	49742	0.117844	0.0235546	-5.44417	0.928692
1993	ANKRD11	HGLibA_01993	CGTCCCCGCGGATGGCGGCT	4.33894	4.60829	0.0820784	0.0952331		0.0219485	0.0206656	-5.50974	-5.59662	0.000944208	6711	0.0173634	0.021307	-5.55318	1.76037
1994	ANKRD11	HGLibA_01994	GTCAACGTCAAGGACTTCGC	3.08646	6.48376	0.123118	0.0952331		0.0308551	0.0146879	-5.01835	-6.08922	0.110524	72632	0.187794	0.0227715	-5.55379	0.726318
1995	ANKRD11	HGLibA_01995	CCCTTCACCGCGGGCGCCAA	3.66797	3.96527	0.0820784	0.0952331		0.0259634	0.0240168	-5.26737	-5.37981	0.00158932	9015	0.0217571	0.0249901	-5.32359	1.6624
1996	ANKRD12	HGLibA_01996	AAAAGGAAGTTTACGTTTCA	0.268388	0.803771	0.0410392	0.0476165		0.177417	0.0592414	-2.49478	-4.07725	0.207634	93276	0.274715	0.118329	-3.28602	0.561117
1997	ANKRD12	HGLibA_01997	ACTCTCTGAGCGAAAACAGA	1.5656	1.23245	0.0410392	0.14285		0.091243	0.115907	-3.45414	-3.10896	0.0172982	30465	0.0700733	0.103575	-3.28155	1.15445
1998	ANKRD12	HGLibA_01998	TTCTGACAGTGACAGCAATA	4.47313	7.0196	0.246235	0.190466		0.04258	0.0271335	-4.55368	-5.20378	0.0491914	50558	0.120075	0.0348568	-4.87873	0.920547
1999	ANKRD13A	HGLibA_01999	TGCAATAATGTTCGACCTCG	6.53077	11.4136	0.205196	0.380932		0.0583288	0.0333754	-4.09965	-4.90507	0.0709061	59771	0.146402	0.0458521	-4.50236	0.834453
[truncated: 121,412 more rows]
